# Supplementary material for: Substituent effects on the stability of the four most stable tautomers of adenine and purine
Source: Royal Society of Chemistry journal article supplement (doi:10.1039/c9ra04615a), 2019-01-01
Supplement: c9ra04615a1.pdf [file c9ra04615a1.pdf]

## Electronic Supplementary Information (ESI)

### Substituent effects on stability of the four most stable tautomers of adenine and purine

Halina Szatyłowicz,<sup>\*a</sup> Anna Jezuita,<sup>b</sup> Paulina H. Marek,<sup>a,c</sup> and Tadeusz M. Krygowski<sup>c</sup>

<sup>a</sup> Faculty of Chemistry, Warsaw University of Technology, Noakowskiego 3, 00-664 Warsaw (Poland) [halina@ch.pw.edu.pl](mailto:halina@ch.pw.edu.pl) [pmarek@ch.pw.edu.pl](mailto:pmarek@ch.pw.edu.pl)

<sup>b</sup> Faculty of Chemistry, Opole University, Oleska 48, 45-052 Opole (Poland) [ajezuita@uni.opole.pl](mailto:ajezuita@uni.opole.pl)

<sup>c</sup> Faculty of Chemistry, University of Warsaw, Pasteura 1, 02-093 Warsaw (Poland) [tmkryg@chem.uw.edu.pl](mailto:tmkryg@chem.uw.edu.pl)

#### Supplementary Information

**Figure S1** Dependences of (a) average  $\Delta E_{8-2}$  values and (b) ranges of variability  $\Delta E_{8-2}$  for adenine tautomers on that for purine tautomers SI 3

**Table S1** Relative energies ( $E_{\text{rel}}$ , relative to 9H tautomer) of the studied C8 and C2 substituted adenine derivatives for all four tautomers. SI 4

**Table S2** Relative energies ( $E_{\text{rel}}$ , relative to 9H tautomer) of the studied C8 and C2 substituted purine derivatives for all tautomers. SI 4

**Table S3** Relative energies ( $E_{\text{rel}}$ , relative to 9H tautomer) of the studied N-X substituted adenine and purine tautomer derivatives SI 5

**Table S4** The obtained slope,  $a$ , and determination coefficient,  $R^2$ , values of the linear regressions between SESE<sub>rel</sub> model for adenine and purine substituted tautomers, shown in Fig. 2. SI 5

**Table S5** The obtained slope,  $a$ , and determination coefficient,  $R^2$ , values of the linear regressions between SESE<sub>rel</sub> and  $\sigma$  for adenine and purine substituted tautomers. SI 6

**Table S6** Slope values,  $a$ , and determination coefficients,  $R^2$ , of relation SESE<sub>PU</sub> vs  $\sigma_p$  and  $\sigma_m$  for C2-X and C8-X substituted adenine tautomers. SI 6

**Table S7** Differences of energies between two conformations for X = CHO, OMe and OH substituted adenine derivatives. SI 6

**Table S8** SESE<sub>AN</sub> (in kcal/mol) estimated for adenine (AD) (a) and purine (PU) (b) with aniline as reference. SI 7

- Table S9** The  $SESE_{AN-BEN}$  values obtained for *para* (4-X) and *meta* (3-X) substituted anilines. SI 8
- Table S10** Values of slopes,  $a$ , and determination coefficients,  $R^2$ , for studied dependences  $SESE_{BEN}$ ,  $SESE_{AN}$ ,  $SESE_{IM}$  and  $SESE_{PY}$  on  $\sigma_p$  for adenine and purine derivatives for all tautomers. SI 9
- Table S11** The obtained  $cSAR(NH_2)$  values for C2-X and C8-X substituted adenine tautomers. SI 10
- Table S12** Slope values,  $a$ , and determination coefficients,  $R^2$ , of relation  $cSAR(NH_2)$  vs  $SESE$  for C2-X and C8-X substituted adenine tautomers. SI 10
- Table S13** Values of total energies and Gibbs free energies, cartesian coordinates of equilibrium geometries of C8-X and C2-X substituted adenine (AD) 9H, 7H, 3H and 1H tautomers. SI 11
- Table S14** Values of total energies and Gibbs free energies, cartesian coordinates of equilibrium geometries of NX substituted adenine (AD) 9H, 7H, 3H and 1H tautomers. SI 35
- Table S15** Values of total energies and Gibbs free energies, cartesian coordinates of equilibrium geometries of C8-X and C2-X substituted purine (PU) 9H, 7H, 3H and 1H tautomers. SI 45
- Table S16** Values of total energies and Gibbs free energies, cartesian coordinates of equilibrium geometries of NX substituted purine (PU) 9H, 7H, 3H and 1H tautomers. SI 63

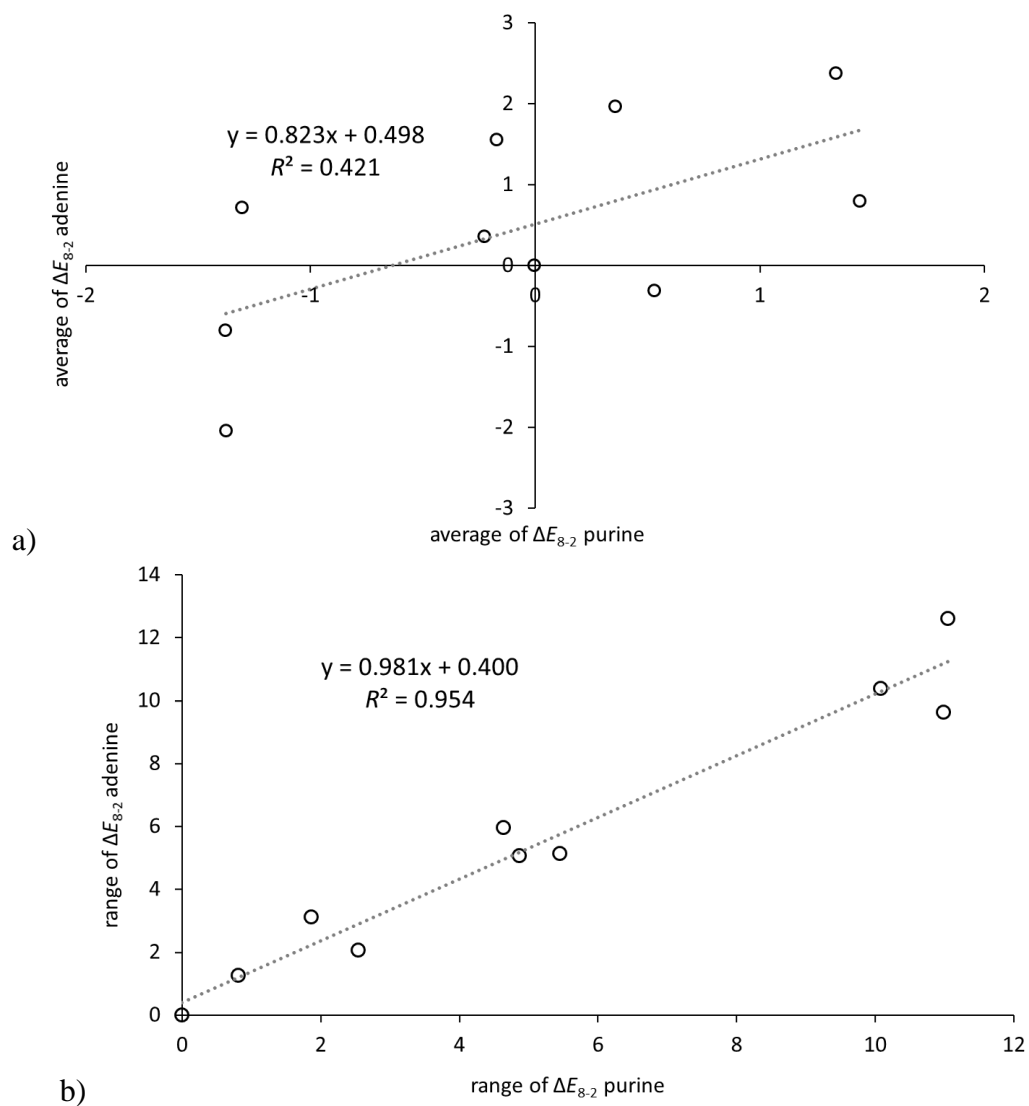

**Figure S1.** Dependences of (a) average  $\Delta E_{8-2}$  values and (b) ranges of variability  $\Delta E_{8-2}$  for adenine tautomers on that for purine tautomers.

**Table S1.** Relative energies ( $E_{\text{rel}}$ , relative to 9H tautomer, in kcal mol<sup>-1</sup>) of the studied C8 and C2 substituted adenine derivatives for all four tautomers.

| $E_{\text{rel}}$<br>kcal mol <sup>-1</sup> | C8-X        |             |              | C2-X        |             |              |
|--------------------------------------------|-------------|-------------|--------------|-------------|-------------|--------------|
|                                            | <b>7H</b>   | <b>3H</b>   | <b>1H</b>    | <b>7H</b>   | <b>3H</b>   | <b>1H</b>    |
| NO <sub>2</sub>                            | 8.50        | 6.81        | 17.16        | 7.09        | 7.17        | 14.39        |
| CN                                         | 8.23        | 4.51        | 14.77        | 7.54        | 9.78        | 18.43        |
| CHO                                        | 8.02        | 10.54       | 21.16        | 6.97        | 2.67        | 8.55         |
| Cl                                         | 6.99        | 4.59        | 13.99        | 7.35        | 9.57        | 19.06        |
| F                                          | 6.71        | 2.47        | 11.37        | 7.30        | 11.81       | 21.76        |
| <b>H</b>                                   | <b>7.18</b> | <b>7.09</b> | <b>16.94</b> | <b>7.18</b> | <b>7.09</b> | <b>16.94</b> |
| Me                                         | 6.92        | 7.54        | 17.04        | 7.16        | 6.52        | 16.30        |
| OMe                                        | 5.59        | 5.76        | 14.53        | 6.55        | 7.55        | 16.60        |
| OH                                         | 5.60        | 4.88        | 13.04        | 6.79        | 8.70        | 18.19        |
| NH <sub>2</sub>                            | 5.70        | 3.77        | 11.50        | 7.32        | 10.61       | 21.15        |
| <i>range</i>                               | 2.91        | 8.07        | 9.79         | 0.99        | 9.14        | 13.21        |
| <i>average</i>                             | 6.95        | 5.80        | 15.15        | 7.12        | 8.14        | 17.14        |
| <i>SD</i>                                  | 1.08        | 2.30        | 3.00         | 0.29        | 2.57        | 3.75         |

**Table S2.** Relative energies ( $E_{\text{rel}}$ , relative to 9H tautomer, in kcal mol<sup>-1</sup>) of the studied C8 and C2 substituted purine derivatives for all tautomers.

| $E_{\text{rel}}$<br>kcal mol <sup>-1</sup> | C8-X        |             |              | C2-X        |             |              |
|--------------------------------------------|-------------|-------------|--------------|-------------|-------------|--------------|
|                                            | <b>7H</b>   | <b>3H</b>   | <b>1H</b>    | <b>7H</b>   | <b>3H</b>   | <b>1H</b>    |
| NO <sub>2</sub>                            | 3.67        | 8.96        | 11.55        | 3.33        | 8.17        | 9.69         |
| CN                                         | 3.62        | 6.56        | 9.18         | 3.38        | 10.94       | 13.28        |
| CHO                                        | 3.54        | 12.34       | 15.93        | 3.62        | 3.67        | 4.95         |
| Cl                                         | 3.20        | 6.14        | 8.39         | 3.28        | 10.71       | 13.26        |
| F                                          | 3.11        | 3.85        | 5.70         | 3.15        | 13.12       | 15.77        |
| <b>H</b>                                   | <b>3.29</b> | <b>8.69</b> | <b>11.50</b> | <b>3.29</b> | <b>8.69</b> | <b>11.50</b> |
| Me                                         | 3.25        | 8.68        | 11.41        | 3.41        | 8.03        | 10.94        |
| OMe                                        | 2.52        | 6.16        | 8.72         | 3.02        | 8.70        | 11.23        |
| OH                                         | 2.55        | 5.43        | 7.47         | 3.59        | 10.16       | 12.92        |
| NH <sub>2</sub>                            | 2.62        | 2.95        | 4.93         | 3.59        | 12.25       | 15.92        |
| <i>range</i>                               | 1.15        | 9.39        | 10.99        | 0.59        | 9.44        | 10.96        |
| <i>average</i>                             | 3.14        | 6.98        | 9.48         | 3.37        | 9.44        | 11.95        |
| <i>SD</i>                                  | 0.44        | 2.76        | 3.24         | 0.19        | 2.66        | 3.17         |

**Table S3.** Relative energies ( $E_{\text{rel}}$ , relative to 9H tautomer, in kcal mol<sup>-1</sup>) of the studied N-X substituted adenine and purine tautomer derivatives

| $E_{\text{rel}}$<br>kcal mol <sup>-1</sup> | N-X adenine |             |              | N-X purine  |             |              |
|--------------------------------------------|-------------|-------------|--------------|-------------|-------------|--------------|
|                                            | <b>7H</b>   | <b>3H</b>   | <b>1H</b>    | <b>7H</b>   | <b>3H</b>   | <b>1H</b>    |
| NO <sub>2</sub>                            | 1.21        | 9.21        | 16.81        | -1.70       | 11.23       | 9.30         |
| CN                                         | 3.98        | 10.99       | 17.81        | 1.85        | 13.66       | 14.83        |
| CHO                                        | 2.31        | 9.29        | 17.12        | 2.18        | 12.48       | 13.77        |
| Cl                                         | 5.34        | 6.48        | 15.92        | 1.97        | 6.90        | 11.27        |
| F                                          | 4.30        | 4.53        | 12.84        | 1.21        | 4.47        | 7.02         |
| <b>H</b>                                   | <b>7.18</b> | <b>7.09</b> | <b>16.94</b> | <b>3.29</b> | <b>8.69</b> | <b>11.50</b> |
| Me                                         | 7.85        | 6.65        | 18.05        | 3.39        | 7.80        | 13.01        |
| OMe                                        | 4.71        | 5.14        | 13.23        | 2.40        | 5.66        | 9.04         |
| OH                                         | 6.06        | 3.52        | 14.66        | 2.84        | 3.10        | 12.27        |
| NH <sub>2</sub>                            | 7.09        | 5.85        | 16.38        | 4.02        | 7.10        | 13.02        |
| <i>range</i>                               | 6.64        | 7.47        | 5.21         | 5.71        | 10.56       | 7.82         |
| <i>average</i>                             | 5.00        | 6.88        | 15.98        | 2.14        | 8.11        | 11.50        |
| <i>SD</i>                                  | 2.15        | 2.34        | 1.82         | 1.59        | 3.45        | 2.41         |

**Table S4.** The obtained slope,  $a$ , and determination coefficient,  $R^2$ , values of the linear regressions between SESE<sub>rel</sub> model for adenine and purine substituted tautomers, shown in Fig. 2.

|                                        | $a$           | $R^2$ |
|----------------------------------------|---------------|-------|
| C8-X                                   |               |       |
| <b>7H</b>                              | 2.447 ± 0.136 | 0.976 |
| 3H                                     | 0.792 ± 0.090 | 0.906 |
| <b>1H</b>                              | 0.922 ± 0.003 | 0.994 |
| C2-X                                   |               |       |
| <b>7H</b>                              | 0.211 ± 0.523 | 0.020 |
| 3H                                     | 0.963 ± 0.029 | 0.993 |
| <b>1H</b>                              | 1.176 ± 0.040 | 0.991 |
| N-X                                    |               |       |
| <b>7H</b>                              | 1.146 ± 0.256 | 0.715 |
| <b>7H</b> without CHO                  | 1.151 ± 0.150 | 0.893 |
| 3H                                     | 0.673 ± 0.031 | 0.983 |
| <b>1H</b>                              | 0.580 ± 0.171 | 0.591 |
| <b>1H</b> without NO <sub>2</sub> , OH | 0.710 ± 0.118 | 0.858 |

**Table S5.** The obtained slope,  $a$ , and determination coefficient,  $R^2$ , values of the linear regressions between  $\text{SESE}_{\text{rel}}$  and  $\sigma$  for adenine and purine substituted tautomers.

|                                                   | adenine            |              | purine             |              |
|---------------------------------------------------|--------------------|--------------|--------------------|--------------|
|                                                   | $a$                | $R^2$        | $a$                | $R^2$        |
| $\text{SESE}_{\text{rel}}$ vs $\sigma_{\text{p}}$ | C8-X               |              |                    |              |
| <b>7H</b>                                         | $2.206 \pm 0.291$  | <b>0.878</b> | $0.855 \pm 0.147$  | <b>0.810</b> |
| 3H                                                | $1.497 \pm 1.682$  | 0.090        | $3.306 \pm 1.768$  | 0.304        |
| <b>1H</b>                                         | $3.348 \pm 1.976$  | 0.264        | $3.815 \pm 2.093$  | 0.294        |
|                                                   | C2-X               |              |                    |              |
| <b>7H</b>                                         | $0.205 \pm 0.212$  | 0.105        | $-0.050 \pm 0.149$ | 0.014        |
| 3H                                                | $-1.484 \pm 1.906$ | 0.070        | $-1.884 \pm 1.934$ | 0.106        |
| <b>1H</b>                                         | $-3.633 \pm 2.576$ | 0.199        | $-3.099 \pm 2.176$ | 0.202        |
| $\text{SESE}_{\text{rel}}$ vs $\sigma_{\text{m}}$ | C2-X               |              |                    |              |
| <b>7H</b>                                         | $0.217 \pm 0.360$  | 0.044        | $-0.128 \pm 0.242$ | 0.034        |
| 3H                                                | $-0.294 \pm 3.250$ | 0.001        | $-1.024 \pm 3.343$ | 0.012        |
| <b>1H</b>                                         | $-3.501 \pm 4.569$ | 0.068        | $-2.913 \pm 3.874$ | 0.066        |

**Table S6.** Slope values,  $a$ , and determination coefficients,  $R^2$ , of relation  $\text{SESE}_{\text{PU}}$  vs  $\sigma_{\text{p}}$  and  $\sigma_{\text{m}}$  for C2-X and C8-X substituted adenine tautomers.

|                                                  | C8-X            |       | C2-X                              |                |
|--------------------------------------------------|-----------------|-------|-----------------------------------|----------------|
|                                                  | $a$             | $R^2$ | $a$                               | $R^2$          |
| $\text{SESE}_{\text{PU}}$ vs $\sigma_{\text{p}}$ |                 |       |                                   |                |
| <b>9H</b>                                        | $3.27 \pm 0.35$ | 0.916 | $1.47 \pm 0.19 / 1.55 \pm 0.18$ * | 0.878 / 0.912* |
| <b>7H</b>                                        | $1.92 \pm 0.21$ | 0.913 | $1.21 \pm 0.23$                   | 0.784          |
| 3H                                               | $5.08 \pm 0.40$ | 0.954 | $1.07 \pm 0.21 / 1.18 \pm 0.17$ * | 0.757 / 0.869* |
| <b>1H</b>                                        | $3.74 \pm 0.39$ | 0.921 | $2.00 \pm 0.39 / 1.77 \pm 0.28$ * | 0.769 / 0.848* |
| $\text{SESE}_{\text{PU}}$ vs $\sigma_{\text{m}}$ |                 |       |                                   |                |
| <b>9H</b>                                        | $4.57 \pm 1.16$ | 0.659 | $2.47 \pm 0.26$                   | 0.921          |
| <b>7H</b>                                        | $2.76 \pm 0.65$ | 0.693 | $2.13 \pm 0.26$                   | 0.892          |
| 3H                                               | $7.08 \pm 1.75$ | 0.672 | $1.74 \pm 0.36$                   | 0.746          |
| <b>1H</b>                                        | $5.15 \pm 1.35$ | 0.645 | $3.06 \pm 0.77 / 2.80 \pm 0.49$ * | 0.665 / 0.827* |

\* without X = CHO

**Table S7.** Differences of energies (in kcal/mol) between two conformations for X = CHO, OMe and OH substituted adenine derivatives.

(a)

| AD  | <b>9H</b> |      | <b>7H</b> |      | <b>3H</b> |      | <b>1H</b> |      |
|-----|-----------|------|-----------|------|-----------|------|-----------|------|
| X   | C8-X      | C2-X | C8-X      | C2-X | C8-X      | C2-X | C8-X      | C2-X |
| CHO | 5.5       | 0.2  | 6.6       | 1.4  | 0.4       | 5.9  | 0.5       | 9.8  |
| OMe | 5.1       | 0.2  | 6.0       | 1.6  | 0.7       | 5.5  | 0.2       | 8.5  |
| OH  | 5.7       | 0.1  | 6.8       | 1.1  | 0.2       | 6.8  | 0.7       | 9.1  |

(b)

| AD  | N9-X      | N7-X      | N3-X      | N1-X      |
|-----|-----------|-----------|-----------|-----------|
|     | <b>9H</b> | <b>7H</b> | <b>3H</b> | <b>1H</b> |
| CHO | 4.8       | 5.3       | 5.5       | 5.2       |
| OMe | -         | -         | -         | -         |
| OH  | -         | -         | -         | -         |

**Table S8.** SESE<sub>AN</sub> (in kcal/mol) estimated for adenine (AD) (a) and purine (PU) (b) with aniline as reference.

| (a)             | SESE <sub>AN</sub> |             |             |             |             |             |             |             |
|-----------------|--------------------|-------------|-------------|-------------|-------------|-------------|-------------|-------------|
| AD              | 9H                 |             | 7H          |             | 3H          |             | 1H          |             |
|                 | C8-X               | C2-X        | C8-X        | C2-X        | C8-X        | C2-X        | C8-X        | C2-X        |
| NO <sub>2</sub> | -8.00              | -8.16       | -9.31       | -8.06       | -7.72       | -8.24       | -8.22       | -5.61       |
| CN              | -6.34              | -6.32       | -7.39       | -6.68       | -3.76       | -9.02       | -4.16       | -7.82       |
| CHO             | -1.15              | -6.85       | -1.99       | -6.63       | -4.61       | -2.44       | -5.38       | 1.54        |
| Cl              | -2.48              | 0.48        | -2.28       | 0.31        | 0.02        | -2.00       | 0.48        | -1.64       |
| F               | -0.57              | 6.88        | -0.10       | 6.77        | 4.04        | 2.15        | 4.99        | 2.06        |
| <b>H</b>        | <b>0.00</b>        | <b>0.00</b> | <b>0.00</b> | <b>0.00</b> | <b>0.00</b> | <b>0.00</b> | <b>0.00</b> | <b>0.00</b> |
| Me              | 3.90               | 2.71        | 4.16        | 2.73        | 3.44        | 3.28        | 3.80        | 3.35        |
| OMe             | 6.51               | 9.27        | 8.11        | 9.90        | 7.84        | 8.81        | 8.92        | 9.61        |
| OH              | 6.24               | 10.69       | 7.83        | 11.09       | 8.26        | 9.08        | 10.14       | 9.44        |
| NH <sub>2</sub> | 5.55               | 10.79       | 7.04        | 10.65       | 8.87        | 7.27        | 10.99       | 6.58        |
| <i>range</i>    | 14.51              | 18.95       | 17.42       | 19.16       | 16.60       | 18.10       | 19.21       | 17.43       |
| <i>average</i>  | 0.37               | 1.95        | 0.61        | 2.01        | 1.64        | 0.89        | 2.16        | 1.75        |
| <i>SD</i>       | 5.14               | 7.36        | 6.15        | 7.46        | 5.82        | 6.49        | 6.75        | 5.84        |

  

| (b)             | SESE <sub>AN</sub> |             |             |             |             |             |             |             |
|-----------------|--------------------|-------------|-------------|-------------|-------------|-------------|-------------|-------------|
| PU              | 9H                 |             | 7H          |             | 3H          |             | 1H          |             |
|                 | C8-X               | C2-X        | C8-X        | C2-X        | C8-X        | C2-X        | C8-X        | C2-X        |
| NO <sub>2</sub> | -10.51             | -9.81       | -10.89      | -9.85       | -10.78      | -9.29       | -10.56      | -8.00       |
| CN              | -8.15              | -7.46       | -8.48       | -7.55       | -6.02       | -9.71       | -5.83       | -9.24       |
| CHO             | -3.01              | -7.37       | -3.26       | -7.69       | -6.66       | -2.35       | -7.44       | -0.82       |
| Cl              | -2.45              | -0.29       | -2.36       | -0.28       | 0.11        | -2.31       | 0.66        | -2.05       |
| F               | -0.12              | 6.07        | 0.06        | 6.21        | 4.72        | 1.64        | 5.68        | 1.79        |
| <b>H</b>        | <b>0.00</b>        | <b>0.00</b> | <b>0.00</b> | <b>0.00</b> | <b>0.00</b> | <b>0.00</b> | <b>0.00</b> | <b>0.00</b> |
| Me              | 4.51               | 2.90        | 4.55        | 2.77        | 4.52        | 3.56        | 4.60        | 3.45        |
| OMe             | 8.24               | 9.46        | 9.01        | 9.72        | 10.77       | 9.45        | 11.02       | 9.73        |
| OH              | 7.82               | 10.98       | 8.56        | 10.69       | 11.08       | 9.52        | 11.85       | 9.57        |
| NH <sub>2</sub> | 7.34               | 11.35       | 8.02        | 11.05       | 13.08       | 7.80        | 13.90       | 6.93        |
| <i>range</i>    | 18.75              | 21.16       | 19.90       | 20.90       | 23.86       | 19.24       | 24.46       | 18.97       |
| <i>average</i>  | 0.37               | 1.58        | 0.52        | 1.51        | 2.08        | 0.83        | 2.39        | 1.14        |
| <i>SD</i>       | 6.62               | 7.93        | 7.02        | 7.94        | 8.20        | 7.00        | 8.52        | 6.59        |

**Table S9.** The  $SESE_{AN-BEN}$  values (in kcal/mol) obtained for *para* (4-X) and *meta* (3-X) substituted anilines.

| method          | B97D3       |       | B3LYP      |       |
|-----------------|-------------|-------|------------|-------|
| bases           | aug-cc-pvdz |       | 6-311++Gdp |       |
|                 | C4-X        | C3-X  | C4-X*      | C3-X* |
| NO <sub>2</sub> | 3.29        | 0.79  | 3.17       | 0.75  |
| CN              | 2.27        | 0.68  | 2.25       | 0.62  |
| CHO             | 3.05        | 0.78  | 2.80       | 0.69  |
| Cl              | -0.35       | 0.31  | -0.27      | 0.34  |
| F               | -1.28       | 0.27  | -1.19      | 0.46  |
| H               | 0.00        | 0.00  | 0.00       | 0.00  |
| Me              | -0.65       | -0.05 | -0.65      | -0.03 |
| OMe             | -2.10       | 0.04  | -2.05      | 0.24  |
| OH              | -2.19       | 0.24  | -2.14      | 0.47  |
| NH <sub>2</sub> | -2.57       | -0.15 | -2.57      | 0.14  |
| range           | 5.86        | 0.94  | 5.74       | 0.78  |
| average         | -0.05       | 0.29  | -0.07      | 0.37  |
| SD              | 2.19        | 0.35  | 2.11       | 0.28  |

\* data taken from [H. Szatyłowicz, T. Siodła, O. A. Stasyuk and T. M. Krygowski, *Phys. Chem. Chem. Phys.*, 2016, **18**, 11711- 11721]



**Table S10.** Values of slopes,  $a$ , and determination coefficients,  $R^2$ , for studied dependences SESE<sub>BEN</sub>, SESE<sub>AN</sub>, SESE<sub>IM</sub> and SESE<sub>PY</sub> on  $\sigma_p$  for adenine and purine derivatives for all tautomers.

|                                   | adenine           |       | purine            |       |
|-----------------------------------|-------------------|-------|-------------------|-------|
| SESE <sub>BEN</sub> vs $\sigma_p$ |                   |       |                   |       |
| <b>C8-X</b>                       |                   |       |                   |       |
|                                   | $a$               | $R^2$ | $a$               | $R^2$ |
| 9H                                | $-6.17 \pm 1.53$  | 0.670 | $-9.44 \pm 1.47$  | 0.838 |
| 7H                                | $-8.37 \pm 1.54$  | 0.788 | $-10.30 \pm 1.50$ | 0.885 |
| 3H                                | $-7.66 \pm 0.96$  | 0.888 | $-12.75 \pm 1.25$ | 0.928 |
| 1H                                | $-9.52 \pm 1.17$  | 0.892 | $-13.26 \pm 1.45$ | 0.913 |
| <b>C2-X</b>                       |                   |       |                   |       |
| 9H                                | $-10.42 \pm 1.59$ | 0.842 | $-11.89 \pm 1.46$ | 0.892 |
| 7H                                | $-10.63 \pm 1.66$ | 0.837 | $-11.84 \pm 1.53$ | 0.882 |
| 3H                                | $-8.67 \pm 1.68$  | 0.769 | $-10.01 \pm 1.74$ | 0.806 |
| 1H                                | $-6.79 \pm 2.26$  | 0.531 | $-8.79 \pm 2.02$  | 0.702 |
| SESE <sub>AN</sub> vs $\sigma_p$  |                   |       |                   |       |
| <b>C8-X</b>                       |                   |       |                   |       |
|                                   | $a$               | $R^2$ | $a$               | $R^2$ |
| 9H                                | $-10.58 \pm 1.28$ | 0.896 | $-13.85 \pm 1.36$ | 0.928 |
| 7H                                | $-12.79 \pm 1.39$ | 0.914 | $-14.71 \pm 1.43$ | 0.929 |
| 3H                                | $-12.03 \pm 1.38$ | 0.905 | $-17.16 \pm 1.72$ | 0.926 |
| 1H                                | $-13.93 \pm 1.63$ | 0.901 | $-17.67 \pm 1.95$ | 0.911 |
| <b>C2-X</b>                       |                   |       |                   |       |
| 9H                                | $-14.83 \pm 2.11$ | 0.861 | $-16.30 \pm 1.97$ | 0.895 |
| 7H                                | $-15.04 \pm 2.15$ | 0.859 | $-16.25 \pm 2.06$ | 0.886 |
| 3H                                | $-13.35 \pm 1.62$ | 0.895 | $-14.42 \pm 1.71$ | 0.899 |
| 1H                                | $-11.20 \pm 2.12$ | 0.778 | $-13.20 \pm 1.96$ | 0.850 |
| SESE <sub>IM</sub> vs $\sigma_p$  |                   |       |                   |       |
| <b>C8-X</b>                       |                   |       |                   |       |
|                                   | $a$               | $R^2$ | $a$               | $R^2$ |
| 9H                                | $-3.57 \pm 0.41$  | 0.906 | $-6.85 \pm 0.73$  | 0.916 |
| 7H                                | $-5.78 \pm 0.66$  | 0.905 | $-7.70 \pm 0.84$  | 0.913 |
| SESE <sub>PY</sub> vs $\sigma_p$  |                   |       |                   |       |
| <b>C2-X</b>                       |                   |       |                   |       |
|                                   | $a$               | $R^2$ | $a$               | $R^2$ |
| 9H                                | $1.87 \pm 0.42$   | 0.717 | $2.04 \pm 0.46$   | 0.708 |
| 7H                                | $1.67 \pm 0.42$   | 0.664 | $2.09 \pm 0.38$   | 0.789 |

**Table S11.** The obtained cSAR(NH<sub>2</sub>) values for C2-X and C8-X substituted adenine tautomers.

| AD-X            | cSAR(NH <sub>2</sub> ) |        |        |        |        |        |        |        |
|-----------------|------------------------|--------|--------|--------|--------|--------|--------|--------|
|                 | 9H                     |        | 7H     |        | 3H     |        | 1H     |        |
|                 | C8-X                   | C2-X   | C8-X   | C2-X   | C8-X   | C2-X   | C8-X   | C2-X   |
| NO <sub>2</sub> | 0.2885                 | 0.2847 | 0.2291 | 0.2305 | 0.3156 | 0.3033 | 0.3009 | 0.3103 |
| CN              | 0.2767                 | 0.2752 | 0.2159 | 0.2196 | 0.3048 | 0.2937 | 0.2887 | 0.2877 |
| CHO             | 0.2741                 | 0.2666 | 0.2185 | 0.2098 | 0.2989 | 0.2785 | 0.2906 | 0.3002 |
| Cl              | 0.2464                 | 0.2676 | 0.1909 | 0.2103 | 0.2763 | 0.2873 | 0.2505 | 0.2626 |
| F               | 0.2411                 | 0.2665 | 0.1869 | 0.2095 | 0.2691 | 0.2898 | 0.2415 | 0.2575 |
| H               | 0.2405                 | 0.2405 | 0.1841 | 0.1841 | 0.2696 | 0.2696 | 0.2439 | 0.2439 |
| Me              | 0.2283                 | 0.2333 | 0.1734 | 0.1780 | 0.2567 | 0.2622 | 0.2268 | 0.2373 |
| OMe             | 0.2120                 | 0.2379 | 0.1620 | 0.1834 | 0.2393 | 0.2653 | 0.2101 | 0.2401 |
| OH              | 0.2171                 | 0.2435 | 0.1679 | 0.1888 | 0.2438 | 0.2706 | 0.2149 | 0.2436 |
| NH <sub>2</sub> | 0.2095                 | 0.2263 | 0.1602 | 0.1730 | 0.2219 | 0.2595 | 0.1862 | 0.2284 |
| <i>range</i>    | 0.0791                 | 0.0584 | 0.0689 | 0.0575 | 0.0937 | 0.0438 | 0.1147 | 0.0819 |
| <i>average</i>  | 0.2434                 | 0.2542 | 0.1889 | 0.1987 | 0.2696 | 0.2780 | 0.2454 | 0.2612 |
| <i>SD</i>       | 0.0282                 | 0.0201 | 0.0247 | 0.0196 | 0.0303 | 0.0149 | 0.0381 | 0.0286 |

**Table S12.** Slope values, *a*, and determination coefficients, *R*<sup>2</sup>, of relation cSAR(NH<sub>2</sub>) vs SESE for C2-X and C8-X substituted adenine tautomers.

|                                               | C8-X                                 |                       | C2-X             |                       |
|-----------------------------------------------|--------------------------------------|-----------------------|------------------|-----------------------|
|                                               | <i>a</i>                             | <i>R</i> <sup>2</sup> | <i>a</i>         | <i>R</i> <sup>2</sup> |
| cSAR(NH <sub>2</sub> ) vs SESE <sub>PU</sub>  |                                      |                       |                  |                       |
| 9H                                            | 0.0178 ± 0.0007                      | 0.988                 | 0.0271 ± 0.0023  | 0.945                 |
| 7H                                            | 0.0265 ± 0.0008                      | 0.992                 | 0.0291 ± 0.0039  | 0.875                 |
| 3H                                            | 0.0125 ± 0.0005                      | 0.989                 | 0.0250 ± 0.0029  | 0.904                 |
| 1H                                            | 0.0211 ± 0.0009                      | 0.987                 | 0.0267 ± 0.0018  | 0.968                 |
| cSAR(NH <sub>2</sub> ) vs SESE <sub>BEN</sub> |                                      |                       |                  |                       |
| 9H                                            | -0.0064 ± 0.0018<br>-0.0071 ± 0.0011 | 0.613<br>0.857*       | -0.0028 ± 0.0009 | 0.534                 |
| 7H                                            | -0.0048 ± 0.0011<br>-0.0049 ± 0.0006 | 0.713<br>0.905*       | -0.0027 ± 0.0009 | 0.525                 |
| 3H                                            | -0.0078 ± 0.0008                     | 0.916                 | -0.0027 ± 0.0007 | 0.643                 |
| 1H                                            | -0.0078 ± 0.0009                     | 0.908                 | -0.0034 ± 0.0020 | 0.267                 |
| cSAR(NH <sub>2</sub> ) vs SESE <sub>AN</sub>  |                                      |                       |                  |                       |
| 9H                                            | -0.0052 ± 0.0007<br>-0.0050 ± 0.0004 | 0.886<br>0.962*       | -0.0021 ± 0.0006 | 0.564                 |
| 7H                                            | -0.0038 ± 0.0005<br>-0.0036 ± 0.0003 | 0.886<br>0.960*       | -0.0020 ± 0.0006 | 0.559                 |
| 3H                                            | -0.0051 ± 0.0004                     | 0.943                 | -0.0019 ± 0.0005 | 0.663                 |
| 1H                                            | -0.0055 ± 0.0005                     | 0.938                 | -0.0036 ± 0.0012 | 0.533                 |

\* without X = CHO

**Table S13.** Values of total energies and Gibbs free energies, cartesian coordinates of equilibrium geometries of C8-X and C2-X substituted adenine (AD) 9H, 7H, 3H and 1H tautomers.

| C8-NO <sub>2</sub> -AD_9H |   |                                     |          | C2-NO <sub>2</sub> -AD_9H |   |                                     |          |          |          |
|---------------------------|---|-------------------------------------|----------|---------------------------|---|-------------------------------------|----------|----------|----------|
|                           |   | E <sub>tot</sub> = -671.528174 a.u. |          |                           |   | E <sub>tot</sub> = -671.527920 a.u. |          |          |          |
|                           |   | E <sub>G</sub> = -671.453526 a.u.   |          |                           |   | E <sub>G</sub> = -671.452683 a.u.   |          |          |          |
|                           |   | Gibbs free energy                   |          |                           |   | Gibbs free energy                   |          |          |          |
| 7                         | N | 3.051385                            | -0.01772 | 0.000257                  | 7 | N                                   | 3.046942 | -0.01773 | 0.000271 |
| 6                         | C | 2.746118                            | -1.33337 | 0.00002                   | 6 | C                                   | 2.721601 | -1.30837 | 0.000153 |
| 7                         | N | 1.53543                             | -1.92744 | -0.00014                  | 7 | N                                   | 1.536128 | -1.91409 | -5.5E-06 |
| 6                         | C | 0.550393                            | -1.01753 | -0.00024                  | 6 | C                                   | 0.550419 | -1.00068 | -8.5E-05 |
| 6                         | C | 0.701554                            | 0.39419  | -0.0001                   | 6 | C                                   | 0.699478 | 0.403469 | -2.7E-05 |
| 6                         | C | 2.039737                            | 0.87859  | 0.000164                  | 6 | C                                   | 2.036062 | 0.883051 | 0.000136 |
| 7                         | N | -0.52075                            | 1.035663 | -0.00042                  | 7 | N                                   | -0.53464 | 1.038806 | -0.00028 |
| 6                         | C | -1.38885                            | 0.039864 | -8.4E-05                  | 6 | C                                   | -1.41325 | 0.046862 | 6.23E-05 |
| 7                         | N | -0.81619                            | -1.21783 | -2E-06                    | 7 | N                                   | -0.8178  | -1.20576 | -7.5E-05 |
| 7                         | N | 2.329792                            | 2.200113 | -0.00034                  | 7 | N                                   | 2.341987 | 2.202056 | -0.00032 |
| 1                         | H | 3.297922                            | 2.492331 | 0.00136                   | 1 | H                                   | 3.312858 | 2.484092 | 0.001186 |
| 1                         | H | 1.588182                            | 2.886888 | 0.001235                  | 1 | H                                   | 1.606485 | 2.894618 | 0.001048 |
| 1                         | H | 3.606125                            | -2.01057 | 0.000368                  | 1 | H                                   | -1.27995 | -2.10767 | -6.1E-05 |
| 1                         | H | -1.32741                            | -2.09385 | 0.000222                  | 7 | N                                   | 3.919078 | -2.26255 | 0.000517 |
| 7                         | N | -2.83393                            | 0.172764 | 0.000083                  | 8 | O                                   | 3.670941 | -3.46573 | -3.5E-05 |
| 8                         | O | -3.46926                            | -0.89808 | 0.000245                  | 8 | O                                   | 5.037433 | -1.75457 | 0.001265 |
| 8                         | O | -3.31558                            | 1.302564 | 0.000032                  | 1 | H                                   | -2.49484 | 0.164399 | 0.000112 |
| C8-CN-AD_9H               |   |                                     |          | C2-CN-AD_9H               |   |                                     |          |          |          |
|                           |   | E <sub>tot</sub> = -559.285658 a.u. |          |                           |   | E <sub>tot</sub> = -559.285679 a.u. |          |          |          |
|                           |   | E <sub>G</sub> = -559.213562 a.u.   |          |                           |   | E <sub>G</sub> = -559.214063 a.u.   |          |          |          |
|                           |   | Gibbs free energy                   |          |                           |   | Gibbs free energy                   |          |          |          |
| 7                         | N | -2.69641                            | -0.02423 | -0.00023                  | 7 | N                                   | 2.707322 | -0.0276  | 0.000394 |
| 6                         | C | -2.38169                            | -1.33751 | -1.6E-05                  | 6 | C                                   | 2.387419 | -1.34143 | 0.000631 |
| 7                         | N | -1.16594                            | -1.91953 | 0.000096                  | 7 | N                                   | 1.169701 | -1.92426 | 0.0003   |
| 6                         | C | -0.18879                            | -0.99872 | 0.000181                  | 6 | C                                   | 0.197908 | -0.99881 | 0.000106 |
| 6                         | C | -0.34955                            | 0.406884 | 0.00007                   | 6 | C                                   | 0.360527 | 0.403264 | 1.79E-05 |
| 6                         | C | -1.69086                            | 0.879203 | -0.00015                  | 6 | C                                   | 1.699396 | 0.873706 | 5.63E-05 |
| 7                         | N | 0.868412                            | 1.05841  | 0.000246                  | 7 | N                                   | -0.86708 | 1.052321 | 5.02E-05 |
| 6                         | C | 1.766702                            | 0.072743 | 0.000038                  | 6 | C                                   | -1.75591 | 0.069837 | -0.00012 |
| 7                         | N | 1.178073                            | -1.19282 | -6.1E-05                  | 7 | N                                   | -1.17327 | -1.18903 | -6.1E-05 |
| 7                         | N | -1.99264                            | 2.199695 | 0.000651                  | 7 | N                                   | 2.007235 | 2.193509 | -0.00063 |
| 1                         | H | -2.96295                            | 2.483723 | -0.00187                  | 1 | H                                   | 2.977914 | 2.475431 | 0.001759 |
| 1                         | H | -1.2568                             | 2.892178 | -0.00188                  | 1 | H                                   | 1.272208 | 2.886522 | 0.001618 |
| 1                         | H | -3.23594                            | -2.022   | -0.00031                  | 1 | H                                   | -1.64609 | -2.08525 | -0.00011 |
| 1                         | H | 1.659664                            | -2.08493 | -0.00016                  | 1 | H                                   | -2.83649 | 0.198267 | -0.00021 |
| 6                         | C | 3.179585                            | 0.236019 | -7.3E-05                  | 6 | C                                   | 3.518081 | -2.25069 | 0.000342 |
| 7                         | N | 4.349025                            | 0.332665 | -0.00015                  | 7 | N                                   | 4.431238 | -2.98403 | 0.000146 |

|                                                  |   |          |          |                                                  |   |   |           |           |           |
|--------------------------------------------------|---|----------|----------|--------------------------------------------------|---|---|-----------|-----------|-----------|
| C8-CHO-AD_9H $E_{\text{tot}} = -580.377851$ a.u. |   |          |          | C2-CHO-AD_9H $E_{\text{tot}} = -580.368390$ a.u. |   |   |           |           |           |
| Gibbs free energy $E_G = -580.295182$ a.u.       |   |          |          | Gibbs free energy $E_G = -580.286234$ a.u.       |   |   |           |           |           |
| 7                                                | N | -2.75516 | -0.21694 | -0.00021                                         | 7 | N | 2.74373   | -0.24696  | -7.1E-06  |
| 6                                                | C | -2.31075 | -1.49311 | -2.5E-05                                         | 6 | C | 2.293642  | -1.52667  | -0.00019  |
| 7                                                | N | -1.0445  | -1.954   | 0.000129                                         | 7 | N | 1.017433  | -1.96458  | -0.00016  |
| 6                                                | C | -0.15797 | -0.94504 | 0.000199                                         | 6 | C | 0.154087  | -0.94277  | -0.00026  |
| 6                                                | C | -0.45971 | 0.443685 | 0.000056                                         | 6 | C | 0.463469  | 0.436726  | -0.00022  |
| 6                                                | C | -1.84254 | 0.779489 | -0.00015                                         | 6 | C | 1.844206  | 0.760338  | -7.1E-05  |
| 7                                                | N | 0.686237 | 1.206    | 0.000255                                         | 7 | N | -0.68766  | 1.212792  | -0.00072  |
| 6                                                | C | 1.681948 | 0.31035  | 0.000055                                         | 6 | C | -1.67625  | 0.329145  | 0.000106  |
| 7                                                | N | 1.216827 | -0.99926 | -5.2E-05                                         | 7 | N | -1.23217  | -0.98339  | 0.000247  |
| 7                                                | N | -2.27373 | 2.063953 | 0.000543                                         | 7 | N | 2.290952  | 2.04245   | -0.00097  |
| 1                                                | H | -3.26751 | 2.250206 | -0.00175                                         | 1 | H | 3.285719  | 2.219932  | 0.001386  |
| 1                                                | H | -1.6099  | 2.825688 | -0.00176                                         | 1 | H | 1.633981  | 2.809665  | 0.001312  |
| 1                                                | H | -3.09419 | -2.25783 | -0.00019                                         | 1 | H | -1.79747  | -1.8243   | 0.000641  |
| 1                                                | H | 1.805223 | -1.82567 | -0.00019                                         | 6 | C | 3.396173  | -2.55271  | 0.000419  |
| 6                                                | C | 3.108805 | 0.633609 | 0.000004                                         | 8 | O | 3.228385  | -3.75862  | 0.000795  |
| 8                                                | O | 3.988866 | -0.22394 | -0.00021                                         | 1 | H | 4.41503   | -2.08959  | 0.001152  |
| 1                                                | H | 3.329063 | 1.726862 | 0.000115                                         | 1 | H | -2.73684  | 0.573254  | 0.000341  |
| C8-CHO-AD_9H $E_{\text{tot}} = -580.369005$ a.u. |   |          |          | C2-CHO-AD_9H $E_{\text{tot}} = -580.368769$ a.u. |   |   |           |           |           |
| Gibbs free energy $E_G = -580.286774$ a.u.       |   |          |          | Gibbs free energy $E_G = -580.287453$ a.u.       |   |   |           |           |           |
| 7                                                | N | 2.735495 | -0.13251 | 0.000183                                         | 7 | N | 0.980462  | 1.447537  | 0.000038  |
| 6                                                | C | 2.275491 | -1.40377 | 0.000328                                         | 6 | C | 1.522341  | 0.211110  | 0.000264  |
| 7                                                | N | 1.004037 | -1.84911 | 8.79E-05                                         | 7 | N | 0.886732  | -0.985811 | 0.000332  |
| 6                                                | C | 0.131231 | -0.82676 | 8.1E-05                                          | 6 | C | -0.444536 | -0.834088 | 0.000223  |
| 6                                                | C | 0.447833 | 0.556022 | 8.32E-05                                         | 6 | C | -1.155632 | 0.385198  | -0.000023 |
| 6                                                | C | 1.835909 | 0.875336 | 2.46E-05                                         | 6 | C | -0.362706 | 1.564859  | -0.000204 |
| 7                                                | N | -0.68368 | 1.335977 | 0.000383                                         | 7 | N | -2.526697 | 0.169261  | 0.000375  |
| 6                                                | C | -1.69652 | 0.46487  | 4.76E-05                                         | 6 | C | -2.650039 | -1.151032 | -0.000294 |
| 7                                                | N | -1.24359 | -0.86179 | -9.9E-05                                         | 7 | N | -1.430739 | -1.809300 | 0.000387  |
| 7                                                | N | 2.277168 | 2.155233 | -0.00032                                         | 7 | N | -0.911612 | 2.805253  | -0.000896 |
| 1                                                | H | 3.272029 | 2.335197 | 0.001323                                         | 1 | H | -0.302224 | 3.611883  | 0.001312  |
| 1                                                | H | 1.617037 | 2.920739 | 0.001356                                         | 1 | H | -1.915229 | 2.919038  | 0.001486  |
| 1                                                | H | 3.04972  | -2.17784 | -9.9E-06                                         | 1 | H | -1.273384 | -2.810126 | 0.000608  |
| 1                                                | H | -1.81356 | -1.70036 | -0.00027                                         | 6 | C | 3.022830  | 0.093499  | 0.000435  |
| 6                                                | C | -3.13722 | 0.762826 | -1.6E-05                                         | 1 | H | -3.592911 | -1.694519 | -0.000423 |
| 8                                                | O | -3.62355 | 1.882712 | 0.000109                                         | 1 | H | 3.366962  | -0.971638 | 0.000463  |
| 1                                                | H | -3.7857  | -0.15537 | -0.00036                                         | 8 | O | 3.800990  | 1.029952  | 0.000561  |

|                                                 |    |          |          |                                                 |    |    |          |          |          |
|-------------------------------------------------|----|----------|----------|-------------------------------------------------|----|----|----------|----------|----------|
| C8-Cl-AD_9H $E_{\text{tot}} = -926.728065$ a.u. |    |          |          | C2-Cl-AD_9H $E_{\text{tot}} = -926.732773$ a.u. |    |    |          |          |          |
| Gibbs free energy $E_G = -926.663$ a.u.         |    |          |          | Gibbs free energy $E_G = -926.667577$ a.u.      |    |    |          |          |          |
| 7                                               | N  | -2.80562 | -0.03014 | 0.006289                                        | 7  | N  | -2.80734 | -0.0337  | 0.019792 |
| 6                                               | C  | -2.49557 | -1.34259 | 0.004669                                        | 6  | C  | -2.47941 | -1.33143 | 0.005714 |
| 7                                               | N  | -1.2781  | -1.92359 | -0.00085                                        | 7  | N  | -1.27922 | -1.91941 | -0.00546 |
| 6                                               | C  | -0.30372 | -1.00156 | -0.00329                                        | 6  | C  | -0.3015  | -0.99388 | -0.00096 |
| 6                                               | C  | -0.46172 | 0.399317 | -0.00323                                        | 6  | C  | -0.46067 | 0.406281 | 0.013339 |
| 6                                               | C  | -1.79585 | 0.872003 | -0.00096                                        | 6  | C  | -1.79933 | 0.871222 | 0.023965 |
| 7                                               | N  | 0.773768 | 1.052237 | -0.00043                                        | 7  | N  | 0.771099 | 1.053895 | 0.013972 |
| 6                                               | C  | 1.643569 | 0.067604 | -0.0005                                         | 6  | C  | 1.656351 | 0.071058 | 0.000401 |
| 7                                               | N  | 1.072919 | -1.19592 | -0.00264                                        | 7  | N  | 1.067699 | -1.1887  | -0.0091  |
| 7                                               | N  | -2.1027  | 2.197444 | -0.03228                                        | 7  | N  | -2.11524 | 2.189889 | 0.038241 |
| 1                                               | H  | -3.06853 | 2.469556 | 0.093513                                        | 1  | H  | -3.08736 | 2.466006 | 0.045147 |
| 1                                               | H  | -1.37022 | 2.882132 | 0.095229                                        | 1  | H  | -1.38355 | 2.886223 | 0.041454 |
| 1                                               | H  | -3.34983 | -2.02713 | 0.009894                                        | 1  | H  | 1.537289 | -2.08622 | -0.01997 |
| 1                                               | H  | 1.563556 | -2.08186 | -0.00282                                        | 17 | Cl | -3.85189 | -2.43694 | 0.001266 |
| 17                                              | Cl | 3.357786 | 0.240379 | 0.002737                                        | 1  | H  | 2.737532 | 0.194593 | -0.00335 |
| C8-F-AD_9H $E_{\text{tot}} = -566.298514$ a.u.  |    |          |          | C2-F-AD_9H $E_{\text{tot}} = -566.310389$ a.u.  |    |    |          |          |          |
| Gibbs free energy $E_G = -566.230975$ a.u.      |    |          |          | Gibbs free energy $E_G = -566.242457$ a.u.      |    |    |          |          |          |
| 7                                               | N  | -2.40905 | -0.1512  | 0.005658                                        | 7  | N  | -2.41619 | -0.15724 | 0.017325 |
| 6                                               | C  | -2.01939 | -1.44093 | 0.004872                                        | 6  | C  | -1.99565 | -1.42294 | 0.004033 |
| 7                                               | N  | -0.76661 | -1.9437  | -0.00078                                        | 7  | N  | -0.77128 | -1.94381 | -0.00625 |
| 6                                               | C  | 0.14607  | -0.96298 | -0.00303                                        | 6  | C  | 0.148608 | -0.95875 | -0.00144 |
| 6                                               | C  | -0.09785 | 0.425072 | -0.00321                                        | 6  | C  | -0.10093 | 0.428    | 0.011992 |
| 6                                               | C  | -1.45683 | 0.812719 | -0.00153                                        | 6  | C  | -1.4664  | 0.808703 | 0.021178 |
| 7                                               | N  | 1.099946 | 1.156507 | -9.5E-05                                        | 7  | N  | 1.087373 | 1.153675 | 0.014247 |
| 6                                               | C  | 2.009867 | 0.222565 | 0.00071                                         | 6  | C  | 2.033778 | 0.230743 | 0.002212 |
| 7                                               | N  | 1.537605 | -1.07353 | -0.0018                                         | 7  | N  | 1.526292 | -1.06537 | -0.00773 |
| 7                                               | N  | -1.8484  | 2.116848 | -0.03467                                        | 7  | N  | -1.8615  | 2.105746 | 0.029822 |
| 1                                               | H  | -2.82904 | 2.324738 | 0.098849                                        | 1  | H  | -2.84784 | 2.32412  | 0.054519 |
| 1                                               | H  | -1.1623  | 2.846449 | 0.101304                                        | 1  | H  | -1.17204 | 2.843565 | 0.05246  |
| 1                                               | H  | -2.82869 | -2.17797 | 0.008451                                        | 1  | H  | 2.052527 | -1.93085 | -0.01763 |
| 1                                               | H  | 2.084715 | -1.92593 | -0.00173                                        | 1  | H  | 3.104888 | 0.422643 | -4.1E-05 |
| 9                                               | F  | 3.327782 | 0.42881  | 0.003966                                        | 9  | F  | -2.99448 | -2.33469 | 0.000832 |
| C8-H-AD_9H $E_{\text{tot}} = -467.096786$ a.u.  |    |          |          | C2-H-AD_9H $E_{\text{tot}} = -467.096786$ a.u.  |    |    |          |          |          |
| Gibbs free energy $E_G = -467.019892$ a.u.      |    |          |          | Gibbs free energy $E_G = -467.019892$ a.u.      |    |    |          |          |          |
| 7                                               | N  | 1.962029 | 0.527275 | 0.004592                                        | 7  | N  | 1.962029 | 0.527275 | 0.004592 |
| 6                                               | C  | 1.304445 | 1.706449 | 0.002924                                        | 6  | C  | 1.304445 | 1.706449 | 0.002924 |
| 7                                               | N  | -0.02351 | 1.934087 | -0.00124                                        | 7  | N  | -0.02351 | 1.934087 | -0.00124 |
| 6                                               | C  | -0.71338 | 0.780032 | -0.00262                                        | 6  | C  | -0.71338 | 0.780032 | -0.00262 |
| 6                                               | C  | -0.17923 | -0.52523 | -0.00271                                        | 6  | C  | -0.17923 | -0.52523 | -0.00271 |
| 6                                               | C  | 1.234633 | -0.6137  | -0.00179                                        | 6  | C  | 1.234633 | -0.6137  | -0.00179 |
| 7                                               | N  | -1.18892 | -1.48459 | 0.002006                                        | 7  | N  | -1.18892 | -1.48459 | 0.002006 |
| 6                                               | C  | -2.30842 | -0.7791  | 0.002786                                        | 6  | C  | -2.30842 | -0.7791  | 0.002786 |
| 7                                               | N  | -2.08635 | 0.591594 | -0.00028                                        | 7  | N  | -2.08635 | 0.591594 | -0.00028 |
| 7                                               | N  | 1.889474 | -1.80705 | -0.03371                                        | 7  | N  | 1.889474 | -1.80705 | -0.03371 |
| 1                                               | H  | 2.892382 | -1.80781 | 0.096014                                        | 1  | H  | 2.892382 | -1.80781 | 0.096014 |
| 1                                               | H  | 1.367686 | -2.66248 | 0.09916                                         | 1  | H  | 1.367686 | -2.66248 | 0.09916  |
| 1                                               | H  | 1.940976 | 2.597346 | 0.008033                                        | 1  | H  | 1.940976 | 2.597346 | 0.008033 |
| 1                                               | H  | -3.31484 | -1.19342 | 0.006012                                        | 1  | H  | -3.31484 | -1.19342 | 0.006012 |
| 1                                               | H  | -2.78351 | 1.326384 | -0.00041                                        | 1  | H  | -2.78351 | 1.326384 | -0.00041 |

|                                     |   |          |          |                                     |   |   |          |          |          |
|-------------------------------------|---|----------|----------|-------------------------------------|---|---|----------|----------|----------|
| C8-Me-AD_9H                         |   |          |          | C2-Me-AD_9H                         |   |   |          |          |          |
| E <sub>tot</sub> = -506.398603 a.u. |   |          |          | E <sub>tot</sub> = -506.396710 a.u. |   |   |          |          |          |
| Gibbs free energy                   |   |          |          | Gibbs free energy                   |   |   |          |          |          |
| E <sub>G</sub> = -506.29734 a.u.    |   |          |          | E <sub>G</sub> = -506.29638 a.u.    |   |   |          |          |          |
| 7                                   | N | -2.45329 | -0.10302 | 0.006983                            | 7 | N | -2.44549 | -0.10853 | 0.013165 |
| 6                                   | C | -2.09174 | -1.40278 | 0.005275                            | 6 | C | -2.09655 | -1.4204  | 0.007372 |
| 7                                   | N | -0.8526  | -1.9345  | -0.00118                            | 7 | N | -0.84502 | -1.93126 | -0.00276 |
| 6                                   | C | 0.087738 | -0.97488 | -0.00427                            | 6 | C | 0.091644 | -0.96828 | -0.0053  |
| 6                                   | C | -0.12524 | 0.41862  | -0.00477                            | 6 | C | -0.12178 | 0.423799 | -0.00246 |
| 6                                   | C | -1.47692 | 0.835079 | -0.00242                            | 6 | C | -1.4782  | 0.831503 | 0.003786 |
| 7                                   | N | 1.083376 | 1.111687 | -0.0004                             | 7 | N | 1.083738 | 1.122091 | 0.000967 |
| 6                                   | C | 2.017527 | 0.169197 | 0.000985                            | 6 | C | 2.00809  | 0.175341 | -0.002   |
| 7                                   | N | 1.466576 | -1.11222 | -0.00276                            | 7 | N | 1.470793 | -1.10612 | -0.00647 |
| 7                                   | N | -1.83636 | 2.151097 | -0.04285                            | 7 | N | -1.84127 | 2.145418 | -0.03002 |
| 1                                   | H | -2.8072  | 2.379831 | 0.126621                            | 1 | H | -2.81398 | 2.373773 | 0.12772  |
| 1                                   | H | -1.12948 | 2.854179 | 0.126144                            | 1 | H | -1.13562 | 2.852904 | 0.124273 |
| 1                                   | H | -2.9187  | -2.12039 | 0.012297                            | 1 | H | 1.976208 | -1.98378 | -0.00885 |
| 1                                   | H | 1.970078 | -1.991   | -0.00227                            | 1 | H | 3.083417 | 0.343029 | -0.00082 |
| 6                                   | C | 3.491565 | 0.401851 | 0.004501                            | 6 | C | -3.23822 | -2.40422 | 0.014047 |
| 1                                   | H | 3.966429 | -0.04837 | 0.893153                            | 1 | H | -3.8731  | -2.24183 | 0.900442 |
| 1                                   | H | 3.968099 | -0.03556 | -0.88967                            | 1 | H | -3.87628 | -2.24936 | -0.87152 |
| 1                                   | H | 3.677777 | 1.483323 | 0.012035                            | 1 | H | -2.85449 | -3.43236 | 0.017231 |
| C8-OMe-AD_9H                        |   |          |          | C2-OMe-AD_9H                        |   |   |          |          |          |
| E <sub>tot</sub> = -581.577754 a.u. |   |          |          | E <sub>tot</sub> = -581.582143 a.u. |   |   |          |          |          |
| Gibbs free energy                   |   |          |          | Gibbs free energy                   |   |   |          |          |          |
| E <sub>G</sub> = -581.472704 a.u.   |   |          |          | E <sub>G</sub> = -581.477071 a.u.   |   |   |          |          |          |
| 7                                   | N | -2.78495 | 0.270621 | 0.00619                             | 7 | N | 1.172431 | 0.743748 | -0.01034 |
| 6                                   | C | -2.68422 | -1.07221 | 0.005121                            | 6 | C | 1.271205 | -0.60296 | -0.00689 |
| 7                                   | N | -1.56777 | -1.83232 | -0.0004                             | 7 | N | 0.290019 | -1.52498 | -0.0008  |
| 6                                   | C | -0.46345 | -1.07378 | -0.00334                            | 6 | C | -0.92248 | -0.94173 | 0.000879 |
| 6                                   | C | -0.40224 | 0.334835 | -0.00473                            | 6 | C | -1.19661 | 0.438243 | 0.000564 |
| 6                                   | C | -1.64433 | 1.002837 | -0.00334                            | 6 | C | -0.05916 | 1.287303 | -0.00255 |
| 7                                   | N | 0.924131 | 0.787615 | -0.00019                            | 7 | N | -2.56853 | 0.681959 | -0.00362 |
| 6                                   | C | 1.632019 | -0.32703 | 0.001051                            | 6 | C | -3.11518 | -0.52146 | -0.00403 |
| 7                                   | N | 0.867814 | -1.4836  | -0.00093                            | 7 | N | -2.16853 | -1.54371 | -0.00078 |
| 7                                   | N | -1.74707 | 2.368079 | -0.05368                            | 7 | N | -0.17266 | 2.644035 | 0.029323 |
| 1                                   | H | -2.65402 | 2.765224 | 0.158397                            | 1 | H | 0.661257 | 3.199244 | -0.10836 |
| 1                                   | H | -0.92554 | 2.914755 | 0.17007                             | 1 | H | -1.08139 | 3.064806 | -0.10774 |
| 1                                   | H | -3.63313 | -1.61807 | 0.012029                            | 1 | H | -2.34393 | -2.54101 | -0.00067 |
| 1                                   | H | 1.212162 | -2.43554 | -0.00062                            | 8 | O | 2.557264 | -1.0306  | -0.01291 |
| 8                                   | O | 2.965689 | -0.4561  | 0.003888                            | 1 | H | -4.18246 | -0.73333 | -0.00679 |
| 6                                   | C | 3.694486 | 0.798326 | 0.000613                            | 6 | C | 2.766683 | -2.4562  | -0.01125 |
| 1                                   | H | 4.752494 | 0.510708 | -0.00232                            | 1 | H | 3.85732  | -2.57989 | -0.01602 |
| 1                                   | H | 3.438958 | 1.379873 | -0.89786                            | 1 | H | 2.326762 | -2.91418 | 0.888457 |
| 1                                   | H | 3.444885 | 1.381156 | 0.900001                            | 1 | H | 2.318457 | -2.9176  | -0.90512 |

| C8-OMe-AD_9H |   |                                     |          | C2-OMe-AD_9H |   |                                     |          |          |          |
|--------------|---|-------------------------------------|----------|--------------|---|-------------------------------------|----------|----------|----------|
|              |   | E <sub>tot</sub> = -581.569543 a.u. |          |              |   | E <sub>tot</sub> = -581.581759 a.u. |          |          |          |
|              |   | E <sub>G</sub> = -581.464982 a.u.   |          |              |   | E <sub>G</sub> = -581.476584 a.u.   |          |          |          |
|              |   | Gibbs free energy                   |          |              |   | Gibbs free energy                   |          |          |          |
| 7            | N | -2.78414                            | 0.28138  | 0.008074     | 7 | N                                   | 1.174032 | 0.793835 | -0.00302 |
| 6            | C | -2.70655                            | -1.06384 | 0.004425     | 6 | C                                   | 1.298732 | -0.55015 | 0.000068 |
| 7            | N | -1.60305                            | -1.84225 | -0.00209     | 7 | N                                   | 0.333552 | -1.48937 | 0.004074 |
| 6            | C | -0.48762                            | -1.09937 | -0.00241     | 6 | C                                   | -0.88268 | -0.92642 | 0.004    |
| 6            | C | -0.39955                            | 0.305334 | -0.00058     | 6 | C                                   | -1.18606 | 0.452017 | 0.004112 |
| 6            | C | -1.63256                            | 0.995011 | 0.000801     | 6 | C                                   | -0.07064 | 1.320238 | 0.003429 |
| 7            | N | 0.929066                            | 0.736475 | 0.007161     | 7 | N                                   | -2.56347 | 0.668177 | -0.00364 |
| 6            | C | 1.625919                            | -0.38243 | 0.007135     | 6 | C                                   | -3.08393 | -0.54622 | -0.00531 |
| 7            | N | 0.837944                            | -1.53332 | 0.000768     | 7 | N                                   | -2.11859 | -1.5506  | -0.00039 |
| 7            | N | -1.7078                             | 2.359449 | -0.04299     | 7 | N                                   | -0.20248 | 2.67699  | 0.041224 |
| 1            | H | -2.60714                            | 2.781977 | 0.148896     | 1 | H                                   | 0.619943 | 3.2412   | -0.12656 |
| 1            | H | -0.8711                             | 2.893517 | 0.152357     | 1 | H                                   | -1.11619 | 3.079552 | -0.11916 |
| 1            | H | -3.66475                            | -1.59303 | 0.009449     | 1 | H                                   | -2.27349 | -2.55137 | -0.00152 |
| 1            | H | 1.134391                            | -2.50031 | 0.00049      | 8 | O                                   | 2.550524 | -1.07086 | -0.0036  |
| 8            | O | 2.97111                             | -0.39746 | 0.013974     | 6 | C                                   | 3.650528 | -0.13995 | -0.0022  |
| 6            | C | 3.61758                             | -1.68257 | 0.007826     | 1 | H                                   | 4.549462 | -0.77014 | 0.0003   |
| 1            | H | 3.35351                             | -2.26114 | 0.910553     | 1 | H                                   | 3.625102 | 0.496978 | -0.90012 |
| 1            | H | 3.359054                            | -2.24942 | -0.90384     | 1 | H                                   | 3.620931 | 0.499075 | 0.894014 |
| 1            | H | 4.692797                            | -1.46844 | 0.012585     | 1 | H                                   | -4.14704 | -0.77885 | -0.01055 |

| C8-OH-AD_9H |   |                                     |          | C2-OH-AD_9H |   |                                     |          |          |          |
|-------------|---|-------------------------------------|----------|-------------|---|-------------------------------------|----------|----------|----------|
|             |   | E <sub>tot</sub> = -542.301221 a.u. |          |             |   | E <sub>tot</sub> = -542.308123 a.u. |          |          |          |
|             |   | E <sub>G</sub> = -542.220982 a.u.   |          |             |   | E <sub>G</sub> = -542.228153 a.u.   |          |          |          |
|             |   | Gibbs free energy                   |          |             |   | Gibbs free energy                   |          |          |          |
| 7           | N | -2.41898                            | -0.12014 | 0.006536    | 7 | N                                   | -1.59565 | 0.732259 | 0.009828 |
| 6           | C | -2.05175                            | -1.41558 | 0.005832    | 6 | C                                   | -1.66958 | -0.60926 | 0.003569 |
| 7           | N | -0.80551                            | -1.93629 | -9.1E-05    | 7 | N                                   | -0.67781 | -1.52279 | -0.00307 |
| 6           | C | 0.123263                            | -0.97187 | -0.0032     | 6 | C                                   | 0.527595 | -0.92613 | -0.00176 |
| 6           | C | -0.09789                            | 0.420565 | -0.0049     | 6 | C                                   | 0.779441 | 0.459732 | 0.002971 |
| 6           | C | -1.4492                             | 0.826579 | -0.00324    | 6 | C                                   | -0.36741 | 1.293121 | 0.006729 |
| 7           | N | 1.11389                             | 1.125945 | 7.95E-05    | 7 | N                                   | 2.147765 | 0.724222 | 0.00758  |
| 6           | C | 2.024621                            | 0.173914 | 0.001081    | 6 | C                                   | 2.712818 | -0.46985 | 0.004374 |
| 7           | N | 1.511861                            | -1.10831 | -0.00152    | 7 | N                                   | 1.782255 | -1.50776 | -0.002   |
| 7           | N | -1.82405                            | 2.142048 | -0.05131    | 7 | N                                   | -0.27569 | 2.648957 | -0.01265 |
| 1           | H | -2.79394                            | 2.35059  | 0.150426    | 1 | H                                   | -1.1199  | 3.195832 | 0.088026 |
| 1           | H | -1.12976                            | 2.846718 | 0.160293    | 1 | H                                   | 0.628313 | 3.088882 | 0.088176 |
| 1           | H | -2.87192                            | -2.1405  | 0.01172     | 1 | H                                   | 1.973953 | -2.50205 | -0.00533 |
| 1           | H | 2.039039                            | -1.97271 | -0.00136    | 1 | H                                   | 3.783234 | -0.66528 | 0.006286 |
| 8           | O | 3.362373                            | 0.337007 | 0.004601    | 8 | O                                   | -2.93783 | -1.09806 | 0.006018 |
| 1           | H | 3.521142                            | 1.296595 | 0.001374    | 1 | H                                   | -2.84534 | -2.06625 | 0.002192 |

C8-OH-AD\_9H  $E_{\text{tot}} = -542.292184$  a.u.  
Gibbs free energy  $E_G = -542.213349$  a.u.

|   |   |          |          |          |
|---|---|----------|----------|----------|
| 7 | N | -2.42323 | -0.11787 | 0.010082 |
| 6 | C | -2.06755 | -1.41671 | 0.005142 |
| 7 | N | -0.82579 | -1.94883 | -0.00384 |
| 6 | C | 0.109685 | -0.99026 | -0.00603 |
| 6 | C | -0.09648 | 0.402078 | -0.0035  |
| 6 | C | -1.44533 | 0.820569 | 0.00122  |
| 7 | N | 1.115572 | 1.100766 | 0.001627 |
| 6 | C | 2.025218 | 0.152989 | -0.00011 |
| 7 | N | 1.498089 | -1.13662 | -0.00596 |
| 7 | N | -1.80416 | 2.138255 | -0.03962 |
| 1 | H | -2.77254 | 2.364357 | 0.14763  |
| 1 | H | -1.09749 | 2.837809 | 0.145993 |
| 1 | H | -2.89424 | -2.13417 | 0.012357 |
| 1 | H | 1.992386 | -2.02091 | -0.0042  |
| 8 | O | 3.353674 | 0.406679 | 0.005044 |
| 1 | H | 3.85417  | -0.4228  | -0.0066  |

C2-OH-AD\_9H  $E_{\text{tot}} = -542.308312$  a.u.  
Gibbs free energy  $E_G = -542.227964$  a.u.

|   |   |          |          |          |
|---|---|----------|----------|----------|
| 7 | N | -2.43487 | -0.14946 | 0.014406 |
| 6 | C | -2.04568 | -1.44547 | 0.004444 |
| 7 | N | -0.80976 | -1.96237 | -0.00556 |
| 6 | C | 0.113393 | -0.98543 | -0.00426 |
| 6 | C | -0.11698 | 0.405257 | 0.002709 |
| 6 | C | -1.47624 | 0.802052 | 0.009853 |
| 7 | N | 1.080742 | 1.117392 | 0.008368 |
| 6 | C | 2.0156   | 0.183208 | 0.002891 |
| 7 | N | 1.491193 | -1.10712 | -0.00516 |
| 7 | N | -1.85105 | 2.110552 | -0.01643 |
| 1 | H | -2.82473 | 2.338512 | 0.132714 |
| 1 | H | -1.14752 | 2.822712 | 0.125014 |
| 1 | H | 2.006242 | -1.97917 | -0.00954 |
| 1 | H | 3.089026 | 0.361871 | 0.004779 |
| 8 | O | -3.05186 | -2.35894 | 0.007065 |
| 1 | H | -3.87436 | -1.83998 | 0.011617 |

C8-NH<sub>2</sub>-AD\_9H  $E_{\text{tot}} = -522.439419$  a.u.  
Gibbs free energy  $E_G = -522.347455$  a.u.

|   |   |          |          |          |
|---|---|----------|----------|----------|
| 7 | N | -2.43342 | -0.11678 | 0.005091 |
| 6 | C | -2.06818 | -1.41293 | 0.005296 |
| 7 | N | -0.82218 | -1.93493 | -0.00203 |
| 6 | C | 0.108298 | -0.9712  | -0.00281 |
| 6 | C | -0.10979 | 0.420932 | -0.00311 |
| 6 | C | -1.46118 | 0.827325 | -0.00474 |
| 7 | N | 1.098245 | 1.124344 | -0.00715 |
| 6 | C | 2.025272 | 0.177659 | 0.000592 |
| 7 | N | 1.494623 | -1.1088  | -0.00459 |
| 7 | N | -1.83257 | 2.145592 | -0.05872 |
| 1 | H | -2.79883 | 2.354933 | 0.160255 |
| 1 | H | -1.13448 | 2.842291 | 0.168448 |
| 1 | H | -2.8893  | -2.13683 | 0.015086 |
| 1 | H | 2.001183 | -1.98127 | 0.080494 |
| 7 | N | 3.391618 | 0.392401 | 0.0896   |
| 1 | H | 3.619174 | 1.372494 | -0.05702 |
| 1 | H | 3.961502 | -0.21507 | -0.49406 |

C2-NH<sub>2</sub>-AD\_9H  $E_{\text{tot}} = -522.447764$  a.u.  
Gibbs free energy  $E_G = -522.355774$  a.u.

|   |   |          |          |          |
|---|---|----------|----------|----------|
| 7 | N | 2.454677 | -0.12805 | -0.04902 |
| 6 | C | 2.08476  | -1.43623 | -0.06598 |
| 7 | N | 0.833293 | -1.95446 | -0.04613 |
| 6 | C | -0.09416 | -0.98555 | -0.02743 |
| 6 | C | 0.128795 | 0.406344 | -0.01512 |
| 6 | C | 1.487364 | 0.807918 | -0.01969 |
| 7 | N | -1.07291 | 1.112904 | 0.000541 |
| 6 | C | -2.00412 | 0.175804 | 5.99E-05 |
| 7 | N | -1.4728  | -1.11331 | -0.01461 |
| 7 | N | 1.850985 | 2.122375 | 0.043743 |
| 1 | H | 2.817561 | 2.354386 | -0.14422 |
| 1 | H | 1.140814 | 2.824884 | -0.11486 |
| 1 | H | -1.98457 | -1.98688 | -0.02382 |
| 1 | H | 3.121273 | -2.34304 | -0.15612 |
| 7 | N | -3.07829 | 0.34895  | 0.009487 |
| 1 | H | 4.034146 | -1.9982  | 0.112351 |
| 1 | H | 2.897234 | -3.29659 | 0.099345 |



|                                     |   |          |          |                                     |   |   |          |          |          |
|-------------------------------------|---|----------|----------|-------------------------------------|---|---|----------|----------|----------|
| C8-NO <sub>2</sub> -AD_7H           |   |          |          | C2-NO <sub>2</sub> -AD_7H           |   |   |          |          |          |
| E <sub>tot</sub> = -671.514633 a.u. |   |          |          | E <sub>tot</sub> = -671.516624 a.u. |   |   |          |          |          |
| Gibbs free energy                   |   |          |          | Gibbs free energy                   |   |   |          |          |          |
| E <sub>G</sub> = -671.440228 a.u.   |   |          |          | E <sub>G</sub> = -671.4435 a.u.     |   |   |          |          |          |
| 7                                   | N | -1.9551  | -0.49365 | 0.001328                            | 7 | N | -1.96367 | -0.50606 | 0.037673 |
| 6                                   | C | -1.32718 | -1.69881 | -0.00813                            | 6 | C | -1.30252 | -1.66757 | -0.01593 |
| 7                                   | N | -0.01691 | -1.9628  | 0.000457                            | 7 | N | -0.01037 | -1.94734 | -0.04173 |
| 6                                   | C | 0.743247 | -0.8473  | 0.003918                            | 6 | C | 0.742849 | -0.82309 | -0.04754 |
| 6                                   | C | 0.1989   | 0.469894 | 0.000115                            | 6 | C | 0.181461 | 0.481418 | 0.004456 |
| 6                                   | C | -1.20809 | 0.621382 | 0.009085                            | 6 | C | -1.22084 | 0.618285 | 0.06843  |
| 7                                   | N | 1.291625 | 1.318933 | -0.00749                            | 7 | N | 1.270973 | 1.340571 | -0.02854 |
| 6                                   | C | 2.393614 | 0.495358 | -0.00813                            | 6 | C | 2.398151 | 0.539999 | -0.1021  |
| 7                                   | N | 2.130259 | -0.79467 | 0.002423                            | 7 | N | 2.125827 | -0.75373 | -0.11019 |
| 7                                   | N | -1.84683 | 1.838198 | -0.0314                             | 7 | N | -1.88304 | 1.824198 | 0.099021 |
| 1                                   | H | -2.84661 | 1.801365 | 0.139275                            | 1 | H | -2.87722 | 1.754646 | 0.292676 |
| 1                                   | H | -1.37044 | 2.655681 | 0.328739                            | 1 | H | -1.41755 | 2.618709 | 0.52037  |
| 1                                   | H | -1.99665 | -2.56469 | -0.0176                             | 1 | H | 1.259939 | 2.352361 | -0.05921 |
| 1                                   | H | 1.347315 | 2.33058  | -0.04855                            | 1 | H | 3.396301 | 0.972684 | -0.14591 |
| 7                                   | N | 3.722177 | 1.103841 | -0.02084                            | 7 | N | -2.21211 | -2.87548 | -0.04973 |
| 8                                   | O | 3.73699  | 2.348694 | -0.03759                            | 8 | O | -2.03281 | -3.72798 | 0.815309 |
| 8                                   | O | 4.698603 | 0.365949 | -0.01452                            | 8 | O | -3.05577 | -2.90124 | -0.94361 |

|                                     |   |          |          |                                     |   |   |          |          |          |
|-------------------------------------|---|----------|----------|-------------------------------------|---|---|----------|----------|----------|
| C8-CN-AD_7H                         |   |          |          | C2-CN-AD_7H                         |   |   |          |          |          |
| E <sub>tot</sub> = -559.272535 a.u. |   |          |          | E <sub>tot</sub> = -559.273660 a.u. |   |   |          |          |          |
| Gibbs free energy                   |   |          |          | Gibbs free energy                   |   |   |          |          |          |
| E <sub>G</sub> = -559.200373 a.u.   |   |          |          | E <sub>G</sub> = -559.201542 a.u.   |   |   |          |          |          |
| 7                                   | N | -1.94893 | -0.49362 | -0.00432                            | 7 | N | -1.97013 | -0.50756 | -0.00283 |
| 6                                   | C | -1.31743 | -1.69605 | -0.00963                            | 6 | C | -1.32569 | -1.70242 | -0.00818 |
| 7                                   | N | -0.00562 | -1.95327 | 0.006606                            | 7 | N | -0.00852 | -1.95518 | 0.006965 |
| 6                                   | C | 0.750955 | -0.8347  | 0.009112                            | 6 | C | 0.736926 | -0.83186 | 0.010033 |
| 6                                   | C | 0.202522 | 0.47697  | -0.00122                            | 6 | C | 0.177302 | 0.474123 | 0.000512 |
| 6                                   | C | -1.20334 | 0.62262  | 0.004976                            | 6 | C | -1.2263  | 0.611577 | 0.00518  |
| 7                                   | N | 1.290004 | 1.332338 | -0.00979                            | 7 | N | 1.266289 | 1.332777 | -0.00865 |
| 6                                   | C | 2.419842 | 0.520159 | -0.007                              | 6 | C | 2.396773 | 0.530303 | -0.00808 |
| 7                                   | N | 2.136124 | -0.77856 | 0.010038                            | 7 | N | 2.124799 | -0.76182 | 0.00883  |
| 7                                   | N | -1.84727 | 1.840887 | -0.04088                            | 7 | N | -1.88386 | 1.822536 | -0.04365 |
| 1                                   | H | -2.8465  | 1.789276 | 0.132767                            | 1 | H | -2.88254 | 1.760483 | 0.130196 |
| 1                                   | H | -1.38499 | 2.644211 | 0.368294                            | 1 | H | -1.43025 | 2.628715 | 0.36928  |
| 1                                   | H | -1.98278 | -2.56512 | -0.02029                            | 1 | H | 1.256791 | 2.343251 | -0.06992 |
| 1                                   | H | 1.297828 | 2.343152 | -0.07565                            | 6 | C | -2.19917 | -2.86195 | -0.02234 |
| 6                                   | C | 3.724996 | 1.092976 | -0.01994                            | 7 | N | -2.91088 | -3.79175 | -0.03367 |
| 7                                   | N | 4.775038 | 1.614725 | -0.03159                            | 1 | H | 3.39563  | 0.96358  | -0.0194  |

|                                                  |   |          |          |                                                  |   |   |          |          |          |
|--------------------------------------------------|---|----------|----------|--------------------------------------------------|---|---|----------|----------|----------|
| C8-CHO-AD_7H $E_{\text{tot}} = -580.365063$ a.u. |   |          |          | C2-CHO-AD_7H $E_{\text{tot}} = -580.357663$ a.u. |   |   |          |          |          |
| Gibbs free energy $E_G = -580.282361$ a.u.       |   |          |          | Gibbs free energy $E_G = -580.275525$ a.u.       |   |   |          |          |          |
| 7                                                | N | -1.95033 | -0.49711 | -0.00057                                         | 7 | N | -2.09234 | -0.44428 | -0.00546 |
| 6                                                | C | -1.31556 | -1.69992 | -0.00777                                         | 6 | C | -1.47836 | -1.65277 | -0.01005 |
| 7                                                | N | -0.00501 | -1.95661 | 0.003081                                         | 7 | N | -0.15878 | -1.91802 | 0.006378 |
| 6                                                | C | 0.753473 | -0.8365  | 0.006139                                         | 6 | C | 0.608989 | -0.81194 | 0.009404 |
| 6                                                | C | 0.201704 | 0.478428 | -0.00025                                         | 6 | C | 0.069998 | 0.502307 | -0.00108 |
| 6                                                | C | -1.20654 | 0.619514 | 0.006309                                         | 6 | C | -1.33354 | 0.659957 | 0.003275 |
| 7                                                | N | 1.284544 | 1.332253 | -0.00827                                         | 7 | N | 1.171178 | 1.343949 | -0.01192 |
| 6                                                | C | 2.415237 | 0.533076 | -0.00744                                         | 6 | C | 2.291027 | 0.525116 | -0.01047 |
| 7                                                | N | 2.134453 | -0.77159 | 0.004994                                         | 7 | N | 1.999933 | -0.76231 | 0.008012 |
| 7                                                | N | -1.85043 | 1.836299 | -0.03904                                         | 7 | N | -1.9683  | 1.885566 | -0.04714 |
| 1                                                | H | -2.849   | 1.792514 | 0.138247                                         | 1 | H | -2.9681  | 1.8331   | 0.126406 |
| 1                                                | H | -1.37862 | 2.648827 | 0.338813                                         | 1 | H | -1.50671 | 2.676572 | 0.386845 |
| 1                                                | H | -1.98145 | -2.56885 | -0.01665                                         | 1 | H | 1.175551 | 2.354382 | -0.07424 |
| 1                                                | H | 1.316818 | 2.345019 | -0.0502                                          | 6 | C | -2.349   | -2.88156 | -0.02395 |
| 6                                                | C | 3.76111  | 1.123106 | -0.02222                                         | 8 | O | -3.56669 | -2.87693 | -0.0386  |
| 8                                                | O | 3.947976 | 2.336188 | -0.03675                                         | 1 | H | -1.75079 | -3.82662 | -0.0195  |
| 1                                                | H | 4.591993 | 0.381285 | -0.01995                                         | 1 | H | 3.295874 | 0.944426 | -0.02241 |
| C8-CHO-AD_7H $E_{\text{tot}} = -580.354559$ a.u. |   |          |          | C2-CHO-AD_7H $E_{\text{tot}} = -580.355458$ a.u. |   |   |          |          |          |
| Gibbs free energy $E_G = -580.272533$ a.u.       |   |          |          | Gibbs free energy $E_G = -580.273565$ a.u.       |   |   |          |          |          |
| 7                                                | N | -1.94976 | -0.47843 | -0.00692                                         | 7 | N | -2.04106 | -0.51287 | -0.01246 |
| 6                                                | C | -1.33544 | -1.69234 | -0.00912                                         | 6 | C | -1.39158 | -1.70959 | -0.01466 |
| 7                                                | N | -0.02981 | -1.97146 | 0.01027                                          | 7 | N | -0.06985 | -1.93659 | 0.005748 |
| 6                                                | C | 0.749427 | -0.86579 | 0.013243                                         | 6 | C | 0.661116 | -0.80854 | 0.009067 |
| 6                                                | C | 0.21869  | 0.457503 | 0.000448                                         | 6 | C | 0.088    | 0.494212 | -0.00371 |
| 6                                                | C | -1.18619 | 0.623955 | 0.002457                                         | 6 | C | -1.31566 | 0.616104 | -0.00136 |
| 7                                                | N | 1.316995 | 1.289869 | -0.00934                                         | 7 | N | 1.166346 | 1.364926 | -0.01208 |
| 6                                                | C | 2.443904 | 0.46405  | -0.00373                                         | 6 | C | 2.30721  | 0.574273 | -0.00753 |
| 7                                                | N | 2.129363 | -0.82898 | 0.015307                                         | 7 | N | 2.051107 | -0.71963 | 0.011181 |
| 7                                                | N | -1.81001 | 1.853474 | -0.04775                                         | 7 | N | -1.98518 | 1.825501 | -0.05281 |
| 1                                                | H | -2.81047 | 1.817852 | 0.123673                                         | 1 | H | -2.98168 | 1.746424 | 0.128563 |
| 1                                                | H | -1.33638 | 2.647913 | 0.365878                                         | 1 | H | -1.54523 | 2.623345 | 0.391781 |
| 1                                                | H | -2.01606 | -2.54969 | -0.02048                                         | 1 | H | 1.144893 | 2.3748   | -0.07907 |
| 1                                                | H | 1.330035 | 2.301435 | -0.07051                                         | 1 | H | 3.300738 | 1.020144 | -0.01778 |
| 6                                                | C | 3.787685 | 1.077306 | -0.01834                                         | 6 | C | -2.32768 | -2.89202 | -0.03374 |
| 1                                                | H | 3.763855 | 2.202349 | -0.03936                                         | 8 | O | -1.98191 | -4.05803 | -0.02232 |
| 8                                                | O | 4.840326 | 0.465549 | -0.00951                                         | 1 | H | -3.40499 | -2.58736 | -0.06031 |

|                                     |    |          |          |                                     |    |    |          |          |          |
|-------------------------------------|----|----------|----------|-------------------------------------|----|----|----------|----------|----------|
| C8-Cl-AD_7H                         |    |          |          | C2-Cl-AD_7H                         |    |    |          |          |          |
| E <sub>tot</sub> = -926.716931 a.u. |    |          |          | E <sub>tot</sub> = -926.721057 a.u. |    |    |          |          |          |
| Gibbs free energy                   |    |          |          | Gibbs free energy                   |    |    |          |          |          |
| E <sub>G</sub> = -926.651791 a.u.   |    |          |          | E <sub>G</sub> = -926.656036 a.u.   |    |    |          |          |          |
| 7                                   | N  | -1.95875 | -0.50126 | -0.00946                            | 7  | N  | -1.96296 | -0.50317 | -0.00367 |
| 6                                   | C  | -1.31891 | -1.695   | -0.00885                            | 6  | C  | -1.3148  | -1.68161 | -0.00791 |
| 7                                   | N  | -0.00139 | -1.9409  | 0.011872                            | 7  | N  | -0.01408 | -1.94355 | 0.007715 |
| 6                                   | C  | 0.742744 | -0.81749 | 0.01264                             | 6  | C  | 0.738561 | -0.82027 | 0.010126 |
| 6                                   | C  | 0.182794 | 0.486047 | -0.00368                            | 6  | C  | 0.183463 | 0.485478 | -0.0012  |
| 6                                   | C  | -1.2169  | 0.622053 | -0.00155                            | 6  | C  | -1.21813 | 0.61867  | 0.002448 |
| 7                                   | N  | 1.276274 | 1.352138 | -0.01102                            | 7  | N  | 1.27774  | 1.342771 | -0.00903 |
| 6                                   | C  | 2.39393  | 0.539297 | -0.00469                            | 6  | C  | 2.402496 | 0.5372   | -0.00683 |
| 7                                   | N  | 2.136715 | -0.74853 | 0.015895                            | 7  | N  | 2.125372 | -0.75604 | 0.010651 |
| 7                                   | N  | -1.87474 | 1.839266 | -0.05544                            | 7  | N  | -1.88273 | 1.827707 | -0.04844 |
| 1                                   | H  | -2.87089 | 1.764327 | 0.130999                            | 1  | H  | -2.87933 | 1.756635 | 0.13462  |
| 1                                   | H  | -1.42946 | 2.627346 | 0.401958                            | 1  | H  | -1.43303 | 2.630535 | 0.375864 |
| 1                                   | H  | -1.97441 | -2.57178 | -0.0196                             | 1  | H  | 1.271914 | 2.352642 | -0.07563 |
| 1                                   | H  | 1.288121 | 2.360907 | -0.09081                            | 17 | Cl | -2.37746 | -3.08891 | -0.02569 |
| 17                                  | Cl | 3.963231 | 1.248462 | -0.02311                            | 1  | H  | 3.40383  | 0.964717 | -0.01749 |
| C8-F-AD_7H                          |    |          |          | C2-F-AD_7H                          |    |    |          |          |          |
| E <sub>tot</sub> = -566.287822 a.u. |    |          |          | E <sub>tot</sub> = -566.298761 a.u. |    |    |          |          |          |
| Gibbs free energy                   |    |          |          | Gibbs free energy                   |    |    |          |          |          |
| E <sub>G</sub> = -566.220271 a.u.   |    |          |          | E <sub>G</sub> = -566.230971 a.u.   |    |    |          |          |          |
| 7                                   | N  | -1.95888 | -0.50066 | -0.01127                            | 7  | N  | -1.96518 | -0.50559 | -0.00485 |
| 6                                   | C  | -1.32231 | -1.69395 | -0.01056                            | 6  | C  | -1.3079  | -1.67291 | -0.0087  |
| 7                                   | N  | -0.00371 | -1.94212 | 0.011935                            | 7  | N  | -0.01513 | -1.94667 | 0.006793 |
| 6                                   | C  | 0.741412 | -0.82175 | 0.012946                            | 6  | C  | 0.738782 | -0.82282 | 0.009409 |
| 6                                   | C  | 0.183237 | 0.483026 | -0.00353                            | 6  | C  | 0.18172  | 0.482473 | -0.00121 |
| 6                                   | C  | -1.21361 | 0.622331 | -0.00131                            | 6  | C  | -1.21984 | 0.616461 | 0.002052 |
| 7                                   | N  | 1.283625 | 1.350856 | -0.00497                            | 7  | N  | 1.276353 | 1.34131  | -0.00757 |
| 6                                   | C  | 2.382742 | 0.523988 | -0.00227                            | 6  | C  | 2.400667 | 0.537202 | -0.00628 |
| 7                                   | N  | 2.13917  | -0.75681 | 0.019163                            | 7  | N  | 2.124269 | -0.75699 | 0.010387 |
| 7                                   | N  | -1.87169 | 1.840279 | -0.05439                            | 7  | N  | -1.88343 | 1.825793 | -0.04797 |
| 1                                   | H  | -2.86781 | 1.762665 | 0.131443                            | 1  | H  | -2.8795  | 1.758043 | 0.138332 |
| 1                                   | H  | -1.42918 | 2.625479 | 0.41074                             | 1  | H  | -1.43036 | 2.629197 | 0.371339 |
| 1                                   | H  | -1.97824 | -2.57042 | -0.02191                            | 1  | H  | 1.270184 | 2.350992 | -0.0753  |
| 1                                   | H  | 1.301231 | 2.357335 | -0.11065                            | 9  | F  | -2.12548 | -2.75082 | -0.02055 |
| 9                                   | F  | 3.594846 | 1.076551 | -0.01678                            | 1  | H  | 3.401919 | 0.964965 | -0.0166  |
| C8-H-AD_7H                          |    |          |          | C2-H-AD_7H                          |    |    |          |          |          |
| E <sub>tot</sub> = -467.085338 a.u. |    |          |          | E <sub>tot</sub> = -467.085338 a.u. |    |    |          |          |          |
| Gibbs free energy                   |    |          |          | Gibbs free energy                   |    |    |          |          |          |
| E <sub>G</sub> = -467.00833 a.u.    |    |          |          | E <sub>G</sub> = -467.00833 a.u.    |    |    |          |          |          |
| 7                                   | N  | -1.96277 | -0.50017 | -0.01                               | 7  | N  | -1.96277 | -0.50017 | -0.01    |
| 6                                   | C  | -1.32248 | -1.69578 | -0.00871                            | 6  | C  | -1.32248 | -1.69578 | -0.00871 |
| 7                                   | N  | -0.0069  | -1.94233 | 0.012901                            | 7  | N  | -0.0069  | -1.94233 | 0.012901 |
| 6                                   | C  | 0.742057 | -0.8186  | 0.01347                             | 6  | C  | 0.742057 | -0.8186  | 0.01347  |
| 6                                   | C  | 0.182197 | 0.48572  | -0.00383                            | 6  | C  | 0.182197 | 0.48572  | -0.00383 |
| 6                                   | C  | -1.2189  | 0.620205 | -0.00265                            | 6  | C  | -1.2189  | 0.620205 | -0.00265 |
| 7                                   | N  | 1.272567 | 1.348798 | -0.01317                            | 7  | N  | 1.272567 | 1.348798 | -0.01317 |
| 6                                   | C  | 2.402066 | 0.548237 | -0.00608                            | 6  | C  | 2.402066 | 0.548237 | -0.00608 |
| 7                                   | N  | 2.131882 | -0.74505 | 0.016318                            | 7  | N  | 2.131882 | -0.74505 | 0.016318 |
| 7                                   | N  | -1.87607 | 1.839342 | -0.05822                            | 7  | N  | -1.87607 | 1.839342 | -0.05822 |
| 1                                   | H  | -2.87193 | 1.76392  | 0.130168                            | 1  | H  | -2.87193 | 1.76392  | 0.130168 |
| 1                                   | H  | -1.4308  | 2.624304 | 0.404726                            | 1  | H  | -1.4308  | 2.624304 | 0.404726 |
| 1                                   | H  | -1.98003 | -2.57131 | -0.01873                            | 1  | H  | -1.98003 | -2.57131 | -0.01873 |
| 1                                   | H  | 3.400837 | 0.982174 | -0.01724                            | 1  | H  | 3.400837 | 0.982174 | -0.01724 |
| 1                                   | H  | 1.261259 | 2.358063 | -0.08695                            | 1  | H  | 1.261259 | 2.358063 | -0.08695 |

|                   |   |          |          |                                     |   |   |          |                   |          |  |  |                                     |  |  |  |
|-------------------|---|----------|----------|-------------------------------------|---|---|----------|-------------------|----------|--|--|-------------------------------------|--|--|--|
| C8-Me-AD_7H       |   |          |          | E <sub>tot</sub> = -506.387571 a.u. |   |   |          | C2-Me-AD_7H       |          |  |  | E <sub>tot</sub> = -506.385299 a.u. |  |  |  |
| Gibbs free energy |   |          |          | E <sub>G</sub> = -506.288694 a.u.   |   |   |          | Gibbs free energy |          |  |  | E <sub>G</sub> = -506.284691 a.u.   |  |  |  |
| 7                 | N | -1.96162 | -0.49656 | -0.01316                            | 7 | N | -1.95518 | -0.50342          | -0.00291 |  |  |                                     |  |  |  |
| 6                 | C | -1.32795 | -1.6943  | -0.00969                            | 6 | C | -1.32927 | -1.7151           | -0.00614 |  |  |                                     |  |  |  |
| 7                 | N | -0.01226 | -1.94648 | 0.014821                            | 7 | N | -0.00544 | -1.94077          | 0.012202 |  |  |                                     |  |  |  |
| 6                 | C | 0.741832 | -0.82699 | 0.01535                             | 6 | C | 0.742092 | -0.81759          | 0.011282 |  |  |                                     |  |  |  |
| 6                 | C | 0.188129 | 0.479216 | -0.0047                             | 6 | C | 0.186536 | 0.486219          | -0.00452 |  |  |                                     |  |  |  |
| 6                 | C | -1.20994 | 0.620215 | -0.00531                            | 6 | C | -1.21481 | 0.614578          | 0.00157  |  |  |                                     |  |  |  |
| 7                 | N | 1.284606 | 1.335209 | -0.01193                            | 7 | N | 1.277982 | 1.348659          | -0.0165  |  |  |                                     |  |  |  |
| 6                 | C | 2.421692 | 0.535447 | -0.00343                            | 6 | C | 2.405867 | 0.546626          | -0.01271 |  |  |                                     |  |  |  |
| 7                 | N | 2.130636 | -0.75835 | 0.021007                            | 7 | N | 2.132852 | -0.7467           | 0.010964 |  |  |                                     |  |  |  |
| 7                 | N | -1.86205 | 1.84491  | -0.06291                            | 7 | N | -1.87449 | 1.834449          | -0.05197 |  |  |                                     |  |  |  |
| 1                 | H | -2.85782 | 1.768747 | 0.127214                            | 1 | H | -2.86875 | 1.754174          | 0.143853 |  |  |                                     |  |  |  |
| 1                 | H | -1.41791 | 2.619042 | 0.419812                            | 1 | H | -1.42992 | 2.614782          | 0.419939 |  |  |                                     |  |  |  |
| 1                 | H | -1.98864 | -2.56749 | -0.02022                            | 1 | H | 1.267168 | 2.357594          | -0.09408 |  |  |                                     |  |  |  |
| 1                 | H | 1.275957 | 2.343873 | -0.09482                            | 6 | C | -2.23899 | -2.91685          | -0.02423 |  |  |                                     |  |  |  |
| 6                 | C | 3.797599 | 1.115011 | -0.02216                            | 1 | H | -2.92176 | -2.89108          | 0.840793 |  |  |                                     |  |  |  |
| 1                 | H | 3.967803 | 1.707928 | -0.9371                             | 1 | H | -2.86613 | -2.90347          | -0.93105 |  |  |                                     |  |  |  |
| 1                 | H | 3.964895 | 1.775544 | 0.845443                            | 1 | H | -1.64461 | -3.83877          | -0.00051 |  |  |                                     |  |  |  |
| 1                 | H | 4.525217 | 0.294768 | 0.008704                            | 1 | H | 3.40551  | 0.978495          | -0.0266  |  |  |                                     |  |  |  |
| C8-OMe-AD_7H      |   |          |          | E <sub>tot</sub> = -581.568845 a.u. |   |   |          | C2-OMe-AD_7H      |          |  |  | E <sub>tot</sub> = -581.571698 a.u. |  |  |  |
| Gibbs free energy |   |          |          | E <sub>G</sub> = -581.464301 a.u.   |   |   |          | Gibbs free energy |          |  |  | E <sub>G</sub> = -581.466513 a.u.   |  |  |  |
| 7                 | N | 2.784998 | 0.21089  | 0.018535                            | 7 | N | -1.17118 | 0.746123          | 0.008924 |  |  |                                     |  |  |  |
| 6                 | C | 2.655038 | -1.13404 | 0.017309                            | 6 | C | -1.28018 | -0.60615          | 0.01049  |  |  |                                     |  |  |  |
| 7                 | N | 1.531583 | -1.86992 | -0.00846                            | 7 | N | -0.31051 | -1.52667          | 0.026179 |  |  |                                     |  |  |  |
| 6                 | C | 0.410971 | -1.12346 | -0.01234                            | 6 | C | 0.92903  | -0.99006          | 0.016863 |  |  |                                     |  |  |  |
| 6                 | C | 0.427089 | 0.29607  | 0.00486                             | 6 | C | 1.168908 | 0.405401          | -0.00477 |  |  |                                     |  |  |  |
| 6                 | C | 1.661005 | 0.958412 | 0.005268                            | 6 | C | 0.059205 | 1.274876          | 0.003082 |  |  |                                     |  |  |  |
| 7                 | N | -0.9195  | 0.677888 | -0.00099                            | 7 | N | 2.555867 | 0.535878          | -0.02212 |  |  |                                     |  |  |  |
| 6                 | C | -1.64098 | -0.50156 | -0.00205                            | 6 | C | 3.065965 | -0.74763          | -0.01648 |  |  |                                     |  |  |  |
| 7                 | N | -0.90075 | -1.59584 | -0.0223                             | 7 | N | 2.131834 | -1.68629          | 0.013889 |  |  |                                     |  |  |  |
| 7                 | N | 1.798939 | 2.340628 | 0.058981                            | 7 | N | 0.168505 | 2.655337          | -0.05679 |  |  |                                     |  |  |  |
| 1                 | H | 2.750201 | 2.643459 | -0.13364                            | 1 | H | -0.70628 | 3.133586          | 0.140391 |  |  |                                     |  |  |  |
| 1                 | H | 1.099481 | 2.882541 | -0.43833                            | 1 | H | 0.974237 | 3.071066          | 0.397485 |  |  |                                     |  |  |  |
| 1                 | H | 3.596911 | -1.69242 | 0.031403                            | 1 | H | 3.094685 | 1.387976          | -0.10804 |  |  |                                     |  |  |  |
| 1                 | H | -1.31476 | 1.601192 | 0.12064                             | 8 | O | -2.57193 | -1.01611          | 0.005856 |  |  |                                     |  |  |  |
| 8                 | O | -2.97522 | -0.41802 | 0.013844                            | 1 | H | 4.139282 | -0.93016          | -0.03404 |  |  |                                     |  |  |  |
| 6                 | C | -3.66417 | -1.69904 | 0.016914                            | 6 | C | -2.79089 | -2.44255          | 0.016496 |  |  |                                     |  |  |  |
| 1                 | H | -3.4062  | -2.26493 | -0.89005                            | 1 | H | -3.88242 | -2.55775          | 0.010374 |  |  |                                     |  |  |  |
| 1                 | H | -3.37522 | -2.27751 | 0.906485                            | 1 | H | -2.34162 | -2.91142          | -0.87241 |  |  |                                     |  |  |  |
| 1                 | H | -4.73029 | -1.44398 | 0.036902                            | 1 | H | -2.35319 | -2.89636          | 0.918924 |  |  |                                     |  |  |  |

|                                     |   |          |          |                                     |   |   |          |          |          |
|-------------------------------------|---|----------|----------|-------------------------------------|---|---|----------|----------|----------|
| C8-OMe-AD_7H                        |   |          |          | C2-OMe-AD_7H                        |   |   |          |          |          |
| E <sub>tot</sub> = -581.559228 a.u. |   |          |          | E <sub>tot</sub> = -581.569196 a.u. |   |   |          |          |          |
| Gibbs free energy                   |   |          |          | Gibbs free energy                   |   |   |          |          |          |
| E <sub>G</sub> = -581.454953 a.u.   |   |          |          | E <sub>G</sub> = -581.464275 a.u.   |   |   |          |          |          |
| 7                                   | N | -1.93794 | -0.48467 | -0.01185                            | 7 | N | -1.98637 | -0.49806 | 0.004537 |
| 6                                   | C | -1.29947 | -1.67702 | -0.00485                            | 6 | C | -1.35407 | -1.69608 | 0.005084 |
| 7                                   | N | 0.01921  | -1.92543 | 0.022058                            | 7 | N | -0.04018 | -1.95178 | 0.023541 |
| 6                                   | C | 0.769375 | -0.80549 | 0.015892                            | 6 | C | 0.709678 | -0.83524 | 0.016674 |
| 6                                   | C | 0.206014 | 0.496536 | -0.00858                            | 6 | C | 0.163653 | 0.476894 | -0.00448 |
| 6                                   | C | -1.18677 | 0.636002 | -0.00448                            | 6 | C | -1.23284 | 0.616023 | 0.002763 |
| 7                                   | N | 1.300563 | 1.371007 | -0.00618                            | 7 | N | 1.265014 | 1.33076  | -0.01772 |
| 6                                   | C | 2.42739  | 0.552541 | -0.0137                             | 6 | C | 2.383036 | 0.518224 | -0.0111  |
| 7                                   | N | 2.157923 | -0.73765 | 0.021206                            | 7 | N | 2.100555 | -0.77367 | 0.017439 |
| 7                                   | N | -1.84316 | 1.862138 | -0.06034                            | 7 | N | -1.88963 | 1.836329 | -0.05408 |
| 1                                   | H | -2.83905 | 1.771906 | 0.125725                            | 1 | H | -2.88156 | 1.767046 | 0.154995 |
| 1                                   | H | -1.41358 | 2.620301 | 0.461049                            | 1 | H | -1.43267 | 2.621635 | 0.396622 |
| 1                                   | H | -1.95506 | -2.55417 | -0.01378                            | 1 | H | 1.265111 | 2.33864  | -0.10591 |
| 1                                   | H | 1.275874 | 2.363215 | -0.20017                            | 8 | O | -2.12578 | -2.81204 | -0.00355 |
| 8                                   | O | 3.684105 | 1.023484 | -0.03642                            | 1 | H | 3.386853 | 0.940452 | -0.02652 |
| 6                                   | C | 3.857207 | 2.451355 | -0.05209                            | 6 | C | -3.5533  | -2.62875 | -0.02749 |
| 1                                   | H | 4.94098  | 2.61459  | -0.03788                            | 1 | H | -3.86325 | -2.07299 | -0.92652 |
| 1                                   | H | 3.433773 | 2.88946  | -0.97357                            | 1 | H | -3.96612 | -3.64588 | -0.04129 |
| 1                                   | H | 3.401189 | 2.912071 | 0.841445                            | 1 | H | -3.89463 | -2.08511 | 0.867737 |
| C8-OH-AD_7H                         |   |          |          | C2-OH-AD_7H                         |   |   |          |          |          |
| E <sub>tot</sub> = -542.292302 a.u. |   |          |          | E <sub>tot</sub> = -542.297497 a.u. |   |   |          |          |          |
| Gibbs free energy                   |   |          |          | Gibbs free energy                   |   |   |          |          |          |
| E <sub>G</sub> = -542.212344 a.u.   |   |          |          | E <sub>G</sub> = -542.217166 a.u.   |   |   |          |          |          |
| 7                                   | N | -2.40804 | -0.16261 | 4.04E-05                            | 7 | N | -1.59514 | 0.74378  | -0.00116 |
| 6                                   | C | -2.01331 | -1.45475 | 0.001022                            | 6 | C | -1.6849  | -0.60279 | -0.00055 |
| 7                                   | N | -0.76579 | -1.95258 | 0.008835                            | 7 | N | -0.70887 | -1.51907 | 0.017972 |
| 6                                   | C | 0.183065 | -0.99803 | -0.00719                            | 6 | C | 0.525843 | -0.97335 | 0.014695 |
| 6                                   | C | -0.11523 | 0.390201 | -0.02653                            | 6 | C | 0.749811 | 0.426869 | -0.00312 |
| 6                                   | C | -1.45608 | 0.794447 | -0.007                              | 6 | C | -0.36625 | 1.28527  | 0.000267 |
| 7                                   | N | 1.130381 | 1.032503 | -0.0462                             | 7 | N | 2.135743 | 0.57147  | -0.01488 |
| 6                                   | C | 2.065343 | 0.021617 | -0.05242                            | 6 | C | 2.658961 | -0.70631 | -0.00933 |
| 7                                   | N | 1.563621 | -1.19714 | -0.0184                             | 7 | N | 1.735582 | -1.65567 | 0.015305 |
| 7                                   | N | -1.86834 | 2.119641 | -0.06012                            | 7 | N | -0.2745  | 2.665074 | -0.05651 |
| 1                                   | H | -2.85777 | 2.229344 | 0.14586                             | 1 | H | -1.15443 | 3.135653 | 0.135026 |
| 1                                   | H | -1.28164 | 2.796904 | 0.416168                            | 1 | H | 0.529681 | 3.094245 | 0.387199 |
| 1                                   | H | -2.8253  | -2.18937 | 0.003725                            | 1 | H | 2.666582 | 1.429099 | -0.09512 |
| 1                                   | H | 1.332716 | 2.016766 | -0.1644                             | 1 | H | 3.73425  | -0.87731 | -0.02282 |
| 8                                   | O | 3.369488 | 0.347685 | -0.08872                            | 8 | O | -2.96218 | -1.06862 | -0.01121 |
| 1                                   | H | 3.860133 | -0.49273 | -0.09302                            | 1 | H | -2.88152 | -2.03862 | -0.00453 |

|                           |   |          |          |                                     |   |   |          |                           |          |   |   |                                     |          |          |   |   |          |          |          |
|---------------------------|---|----------|----------|-------------------------------------|---|---|----------|---------------------------|----------|---|---|-------------------------------------|----------|----------|---|---|----------|----------|----------|
| C8-OH-AD_7H               |   |          |          | E <sub>tot</sub> = -542.281660 a.u. |   |   |          | C2-OH-AD_7H               |          |   |   | E <sub>tot</sub> = -542.295711 a.u. |          |          |   |   |          |          |          |
| Gibbs free energy         |   |          |          | E <sub>G</sub> = -542.20272 a.u.    |   |   |          | Gibbs free energy         |          |   |   | E <sub>G</sub> = -542.215488 a.u.   |          |          |   |   |          |          |          |
| 7                         | N | -1.94581 | -0.49057 | -0.01117                            | 7 | N | -1.96797 | -0.53171                  | -0.00775 | 7 | N | -1.96797                            | -0.53171 | -0.00775 | 7 | N | -1.96797 | -0.53171 | -0.00775 |
| 6                         | C | -1.30825 | -1.68234 | -0.00939                            | 6 | C | -1.31543 | -1.72309                  | -0.00974 | 6 | C | -1.31543                            | -1.72309 | -0.00974 | 6 | C | -1.31543 | -1.72309 | -0.00974 |
| 7                         | N | 0.011649 | -1.92983 | 0.015022                            | 7 | N | -0.00646 | -1.96778                  | 0.01064  | 7 | N | -0.00646                            | -1.96778 | 0.01064  | 7 | N | -0.00646 | -1.96778 | 0.01064  |
| 6                         | C | 0.759117 | -0.81042 | 0.007808                            | 6 | C | 0.732121 | -0.83892                  | 0.011604 | 6 | C | 0.732121                            | -0.83892 | 0.011604 | 6 | C | 0.732121 | -0.83892 | 0.011604 |
| 6                         | C | 0.197895 | 0.49112  | -0.01318                            | 6 | C | 0.17049  | 0.464971                  | -0.00426 | 6 | C | 0.17049                             | 0.464971 | -0.00426 | 6 | C | 0.17049  | 0.464971 | -0.00426 |
| 6                         | C | -1.19491 | 0.63087  | 0.000163                            | 6 | C | -1.22969 | 0.591476                  | -0.00246 | 6 | C | -1.22969                            | 0.591476 | -0.00246 | 6 | C | -1.22969 | 0.591476 | -0.00246 |
| 7                         | N | 1.29475  | 1.368609 | 0.005172                            | 7 | N | 1.26098  | 1.331752                  | -0.01108 | 7 | N | 1.26098                             | 1.331752 | -0.01108 | 7 | N | 1.26098  | 1.331752 | -0.01108 |
| 6                         | C | 2.417796 | 0.542178 | -0.01405                            | 6 | C | 2.388748 | 0.533511                  | -0.0051  | 6 | C | 2.388748                            | 0.533511 | -0.0051  | 6 | C | 2.388748 | 0.533511 | -0.0051  |
| 7                         | N | 2.152096 | -0.74295 | 0.020448                            | 7 | N | 2.119973 | -0.76218                  | 0.01605  | 7 | N | 2.119973                            | -0.76218 | 0.01605  | 7 | N | 2.119973 | -0.76218 | 0.01605  |
| 7                         | N | -1.8504  | 1.856215 | -0.04464                            | 7 | N | -1.89603 | 1.804501                  | -0.05769 | 7 | N | -1.89603                            | 1.804501 | -0.05769 | 7 | N | -1.89603 | 1.804501 | -0.05769 |
| 1                         | H | -2.84551 | 1.768767 | 0.145979                            | 1 | H | -2.88941 | 1.73074                   | 0.141838 | 1 | H | -2.88941                            | 1.73074  | 0.141838 | 1 | H | -2.88941 | 1.73074  | 0.141838 |
| 1                         | H | -1.41366 | 2.613977 | 0.47124                             | 1 | H | -1.44656 | 2.59537                   | 0.390209 | 1 | H | -1.44656                            | 2.59537  | 0.390209 | 1 | H | -1.44656 | 2.59537  | 0.390209 |
| 1                         | H | -1.96294 | -2.55999 | -0.01943                            | 1 | H | 1.248972 | 2.340446                  | -0.08936 | 1 | H | 1.248972                            | 2.340446 | -0.08936 | 1 | H | 1.248972 | 2.340446 | -0.08936 |
| 1                         | H | 1.276488 | 2.332269 | -0.3096                             | 1 | H | 3.387584 | 0.967234                  | -0.01548 | 1 | H | 3.387584                            | 0.967234 | -0.01548 | 1 | H | 3.387584 | 0.967234 | -0.01548 |
| 8                         | O | 3.674739 | 1.03107  | -0.0553                             | 8 | O | -2.11714 | -2.82151                  | -0.02445 | 8 | O | -2.11714                            | -2.82151 | -0.02445 | 8 | O | -2.11714 | -2.82151 | -0.02445 |
| 1                         | H | 3.66824  | 1.98664  | 0.109126                            | 1 | H | -3.0287  | -2.48391                  | -0.03804 | 1 | H | -3.0287                             | -2.48391 | -0.03804 | 1 | H | -3.0287  | -2.48391 | -0.03804 |
| C8-NH <sub>2</sub> -AD_7H |   |          |          | E <sub>tot</sub> = -522.430336 a.u. |   |   |          | C2-NH <sub>2</sub> -AD_7H |          |   |   | E <sub>tot</sub> = -522.436103 a.u. |          |          |   |   |          |          |          |
| Gibbs free energy         |   |          |          | E <sub>G</sub> = -522.338657 a.u.   |   |   |          | Gibbs free energy         |          |   |   | E <sub>G</sub> = -522.344372 a.u.   |          |          |   |   |          |          |          |
| 7                         | N | -1.93757 | -0.49698 | 0.006836                            | 7 | N | -1.98356 | -0.51386                  | 0.031323 | 7 | N | -1.98356                            | -0.51386 | 0.031323 | 7 | N | -1.98356 | -0.51386 | 0.031323 |
| 6                         | C | -1.29406 | -1.68474 | 0.014114                            | 6 | C | -1.34715 | -1.72119                  | 0.05001  | 6 | C | -1.34715                            | -1.72119 | 0.05001  | 6 | C | -1.34715 | -1.72119 | 0.05001  |
| 7                         | N | 0.027849 | -1.92563 | 0.025122                            | 7 | N | -0.02282 | -1.96304                  | 0.055132 | 7 | N | -0.02282                            | -1.96304 | 0.055132 | 7 | N | -0.02282 | -1.96304 | 0.055132 |
| 6                         | C | 0.770638 | -0.80228 | -0.00306                            | 6 | C | 0.721525 | -0.84163                  | 0.035878 | 6 | C | 0.721525                            | -0.84163 | 0.035878 | 6 | C | 0.721525 | -0.84163 | 0.035878 |
| 6                         | C | 0.202257 | 0.49697  | -0.03242                            | 6 | C | 0.167422 | 0.464482                  | 0.010102 | 6 | C | 0.167422                            | 0.464482 | 0.010102 | 6 | C | 0.167422 | 0.464482 | 0.010102 |
| 6                         | C | -1.18999 | 0.628127 | -0.00222                            | 6 | C | -1.23312 | 0.596212                  | 0.013945 | 6 | C | -1.23312                            | 0.596212 | 0.013945 | 6 | C | -1.23312 | 0.596212 | 0.013945 |
| 7                         | N | 1.29198  | 1.380881 | -0.0314                             | 7 | N | 1.263371 | 1.326265                  | -0.02274 | 7 | N | 1.263371                            | 1.326265 | -0.02274 | 7 | N | 1.263371 | 1.326265 | -0.02274 |
| 6                         | C | 2.425938 | 0.573025 | -0.04957                            | 6 | C | 2.386506 | 0.523074                  | -0.02124 | 6 | C | 2.386506                            | 0.523074 | -0.02124 | 6 | C | 2.386506 | 0.523074 | -0.02124 |
| 7                         | N | 2.160672 | -0.72372 | 0.001381                            | 7 | N | 2.111852 | -0.77159                  | 0.019953 | 7 | N | 2.111852                            | -0.77159 | 0.019953 | 7 | N | 2.111852 | -0.77159 | 0.019953 |
| 7                         | N | -1.85323 | 1.850544 | -0.05147                            | 7 | N | -1.88801 | 1.818212                  | -0.06577 | 7 | N | -1.88801                            | 1.818212 | -0.06577 | 7 | N | -1.88801 | 1.818212 | -0.06577 |
| 1                         | H | -2.84386 | 1.75945  | 0.159506                            | 1 | H | -2.87967 | 1.750105                  | 0.146327 | 1 | H | -2.87967                            | 1.750105 | 0.146327 | 1 | H | -2.87967 | 1.750105 | 0.146327 |
| 1                         | H | -1.41094 | 2.615041 | 0.449673                            | 1 | H | -1.43266 | 2.604602                  | 0.385151 | 1 | H | -1.43266                            | 2.604602 | 0.385151 | 1 | H | -1.43266 | 2.604602 | 0.385151 |
| 1                         | H | -1.94411 | -2.56606 | 0.021235                            | 1 | H | 1.254956 | 2.333535                  | -0.11648 | 1 | H | 1.254956                            | 2.333535 | -0.11648 | 1 | H | 1.254956 | 2.333535 | -0.11648 |
| 1                         | H | 1.273429 | 2.338698 | -0.36111                            | 1 | H | 3.387307 | 0.951485                  | -0.04935 | 1 | H | 3.387307                            | 0.951485 | -0.04935 | 1 | H | 3.387307 | 0.951485 | -0.04935 |
| 7                         | N | 3.687295 | 1.119287 | -0.17515                            | 7 | N | -2.17951 | -2.82119                  | 0.122191 | 7 | N | -2.17951                            | -2.82119 | 0.122191 | 7 | N | -2.17951 | -2.82119 | 0.122191 |
| 1                         | H | 4.415744 | 0.4264   | -0.02716                            | 1 | H | -1.75211 | -3.70611                  | -0.12208 | 1 | H | -1.75211                            | -3.70611 | -0.12208 | 1 | H | -1.75211 | -3.70611 | -0.12208 |
| 1                         | H | 3.851412 | 1.974813 | 0.347514                            | 1 | H | -3.13507 | -2.67619                  | -0.17829 | 1 | H | -3.13507                            | -2.67619 | -0.17829 | 1 | H | -3.13507 | -2.67619 | -0.17829 |

| C8-NO <sub>2</sub> -AD_3H           |   |          |          | C2-NO <sub>2</sub> -AD_3H           |   |   |          |          |          |
|-------------------------------------|---|----------|----------|-------------------------------------|---|---|----------|----------|----------|
| E <sub>tot</sub> = -671.517325 a.u. |   |          |          | E <sub>tot</sub> = -671.516501 a.u. |   |   |          |          |          |
| Gibbs free energy                   |   |          |          | Gibbs free energy                   |   |   |          |          |          |
| E <sub>G</sub> = -671.444252 a.u.   |   |          |          | E <sub>G</sub> = -671.442059 a.u.   |   |   |          |          |          |
| 7                                   | N | 1.942399 | 0.350453 | 0.000333                            | 7 | N | 1.962134 | 0.430105 | 0.000244 |
| 6                                   | C | 1.357998 | 1.532717 | 9E-05                               | 6 | C | 1.376937 | 1.59742  | 2.7E-05  |
| 7                                   | N | 0.01124  | 1.7428   | -0.00024                            | 7 | N | 0.043212 | 1.84366  | -0.00027 |
| 6                                   | C | -0.82023 | 0.644681 | -0.00019                            | 6 | C | -0.79382 | 0.75882  | -0.00022 |
| 6                                   | C | -0.24232 | -0.65908 | 8.61E-05                            | 6 | C | -0.22538 | -0.55981 | 1.01E-05 |
| 6                                   | C | 1.164623 | -0.78092 | 0.000252                            | 6 | C | 1.179861 | -0.69486 | 0.00014  |
| 7                                   | N | -1.2569  | -1.57917 | 0.000241                            | 7 | N | -1.25009 | -1.46273 | 0.000112 |
| 6                                   | C | -2.33617 | -0.77557 | 0.000129                            | 6 | C | -2.34516 | -0.65573 | 0.000265 |
| 7                                   | N | -2.15781 | 0.585122 | -0.00031                            | 7 | N | -2.1341  | 0.705543 | -0.00028 |
| 7                                   | N | 1.794987 | -1.97211 | -0.00012                            | 7 | N | 1.806112 | -1.89151 | -0.00046 |
| 1                                   | H | 2.805669 | -2.00638 | 0.00221                             | 1 | H | 2.816201 | -1.93253 | 0.002552 |
| 1                                   | H | 1.251093 | -2.82546 | 0.00182                             | 1 | H | 1.256123 | -2.74012 | 0.002085 |
| 1                                   | H | 1.981206 | 2.429908 | 0.00013                             | 1 | H | -3.35672 | -1.06315 | 0.000266 |
| 1                                   | H | -0.37253 | 2.684577 | -0.00045                            | 1 | H | -0.27689 | 2.812888 | -0.00044 |
| 7                                   | N | -3.6986  | -1.34202 | 0.000294                            | 7 | N | 2.219556 | 2.831299 | 0.000155 |
| 8                                   | O | -4.6382  | -0.54297 | -2.6E-05                            | 8 | O | 1.60186  | 3.909268 | -0.00013 |
| 8                                   | O | -3.79635 | -2.57132 | 0.000745                            | 8 | O | 3.434895 | 2.694674 | 0.000616 |

| C8-CN-AD_3H                         |   |          |          | C2-CN-AD_3H                         |   |   |          |          |          |
|-------------------------------------|---|----------|----------|-------------------------------------|---|---|----------|----------|----------|
| E <sub>tot</sub> = -559.278473 a.u. |   |          |          | E <sub>tot</sub> = -559.270093 a.u. |   |   |          |          |          |
| Gibbs free energy                   |   |          |          | Gibbs free energy                   |   |   |          |          |          |
| E <sub>G</sub> = -559.205701 a.u.   |   |          |          | E <sub>G</sub> = -559.198058 a.u.   |   |   |          |          |          |
| 7                                   | N | 1.937225 | 0.348865 | 0.000303                            | 7 | N | 1.969919 | 0.441826 | 9.36E-05 |
| 6                                   | C | 1.353518 | 1.53086  | 6.01E-05                            | 6 | C | 1.395761 | 1.635248 | -7.4E-05 |
| 7                                   | N | 0.005653 | 1.738676 | -0.00027                            | 7 | N | 0.039807 | 1.852506 | -0.00015 |
| 6                                   | C | -0.82641 | 0.641601 | -0.00019                            | 6 | C | -0.79039 | 0.76321  | -6.6E-05 |
| 6                                   | C | -0.24875 | -0.6616  | 8.33E-05                            | 6 | C | -0.22026 | -0.55013 | 9.46E-05 |
| 6                                   | C | 1.157485 | -0.78161 | 0.000214                            | 6 | C | 1.18343  | -0.67957 | 0.000106 |
| 7                                   | N | -1.2614  | -1.58384 | 0.000153                            | 7 | N | -1.24488 | -1.45769 | 0.000654 |
| 6                                   | C | -2.36401 | -0.78813 | 0.000429                            | 6 | C | -2.33981 | -0.65502 | -0.00056 |
| 7                                   | N | -2.16356 | 0.585096 | -0.00032                            | 7 | N | -2.13095 | 0.708371 | 0.000241 |
| 7                                   | N | 1.789495 | -1.97373 | -0.00031                            | 7 | N | 1.810643 | -1.87713 | -0.00036 |
| 1                                   | H | 2.800018 | -2.00691 | 0.002384                            | 1 | H | 2.820565 | -1.91771 | 0.002493 |
| 1                                   | H | 1.24644  | -2.82724 | 0.001993                            | 1 | H | 1.260862 | -2.72582 | 0.002204 |
| 1                                   | H | 1.975327 | 2.428951 | 8.99E-05                            | 1 | H | -3.35103 | -1.06325 | -0.00013 |
| 1                                   | H | -0.37833 | 2.680183 | -0.00051                            | 1 | H | -0.33489 | 2.799067 | -0.00017 |
| 6                                   | C | -3.6864  | -1.33644 | 0.00035                             | 6 | C | 2.221994 | 2.811869 | 3.37E-05 |
| 7                                   | N | -4.76917 | -1.78657 | 0.000273                            | 7 | N | 2.864326 | 3.792561 | 0.00012  |

|                                                     |   |          |          |                                                     |   |   |          |          |          |
|-----------------------------------------------------|---|----------|----------|-----------------------------------------------------|---|---|----------|----------|----------|
| C8-CHO-AD_3H $E_{\text{tot}} = -580.361048$ a.u.    |   |          |          | C2-CHO-AD_3H $E_{\text{tot}} = -580.364512$ a.u.    |   |   |          |          |          |
| Gibbs free energy $E_{\text{G}} = -580.278319$ a.u. |   |          |          | Gibbs free energy $E_{\text{G}} = -580.281952$ a.u. |   |   |          |          |          |
| 7                                                   | N | 1.946593 | 0.439622 | 0.000281                                            | 7 | N | 1.967249 | 0.444632 | 0.000163 |
| 6                                                   | C | 1.376372 | 1.62904  | 2.83E-05                                            | 6 | C | 1.385433 | 1.639967 | -9.6E-06 |
| 7                                                   | N | 0.032432 | 1.854398 | -0.00025                                            | 7 | N | 0.036415 | 1.848571 | -0.00022 |
| 6                                                   | C | -0.81755 | 0.768605 | -0.00016                                            | 6 | C | -0.79491 | 0.767183 | -0.00014 |
| 6                                                   | C | -0.25331 | -0.5452  | 0.000136                                            | 6 | C | -0.21934 | -0.54858 | 2.03E-05 |
| 6                                                   | C | 1.151785 | -0.6804  | 0.000281                                            | 6 | C | 1.186738 | -0.67672 | 8.34E-05 |
| 7                                                   | N | -1.27955 | -1.44656 | 0.00039                                             | 7 | N | -1.237   | -1.45941 | 7.85E-05 |
| 6                                                   | C | -2.38045 | -0.63826 | 0.0002                                              | 6 | C | -2.33833 | -0.6589  | 0.000505 |
| 7                                                   | N | -2.15065 | 0.730415 | -0.00035                                            | 7 | N | -2.13752 | 0.702327 | -0.00012 |
| 7                                                   | N | 1.771135 | -1.87998 | 0.000139                                            | 7 | N | 1.807966 | -1.87954 | -0.00057 |
| 1                                                   | H | 2.781187 | -1.9244  | 0.002086                                            | 1 | H | 2.817389 | -1.9258  | 0.002422 |
| 1                                                   | H | 1.218196 | -2.72693 | 0.001823                                            | 1 | H | 1.253825 | -2.72519 | 0.001997 |
| 1                                                   | H | 2.0105   | 2.518611 | -2.9E-05                                            | 1 | H | -3.34678 | -1.07442 | 0.000512 |
| 1                                                   | H | -0.33959 | 2.800852 | -0.00049                                            | 1 | H | -0.2988  | 2.813487 | -0.00032 |
| 6                                                   | C | -3.72635 | -1.2488  | 0.00021                                             | 6 | C | 2.232923 | 2.858215 | 4.28E-05 |
| 8                                                   | O | -4.78329 | -0.63389 | 0.000619                                            | 8 | O | 1.762611 | 3.989998 | -0.00017 |
| 1                                                   | H | -3.69048 | -2.36785 | -0.00024                                            | 1 | H | 3.327529 | 2.652435 | 0.00045  |
| C8-CHO-AD_3H $E_{\text{tot}} = -580.360469$ a.u.    |   |          |          | C2-CHO-AD_3H $E_{\text{tot}} = -580.355066$ a.u.    |   |   |          |          |          |
| Gibbs free energy $E_{\text{G}} = -580.277681$ a.u. |   |          |          | Gibbs free energy $E_{\text{G}} = -580.272806$ a.u. |   |   |          |          |          |
| 7                                                   | N | 1.939583 | 0.360708 | 0.000362                                            | 7 | N | 2.082648 | 0.391685 | 0.000418 |
| 6                                                   | C | 1.340558 | 1.53633  | 0.000263                                            | 6 | C | 1.530983 | 1.595821 | 0.000176 |
| 7                                                   | N | -0.00876 | 1.728975 | -2.9E-05                                            | 7 | N | 0.173406 | 1.816548 | -0.00021 |
| 6                                                   | C | -0.83155 | 0.622528 | -0.0001                                             | 6 | C | -0.67187 | 0.745214 | -0.00017 |
| 6                                                   | C | -0.23697 | -0.67657 | 6.63E-06                                            | 6 | C | -0.11845 | -0.57566 | 7.99E-05 |
| 6                                                   | C | 1.172934 | -0.77768 | 0.00014                                             | 6 | C | 1.288217 | -0.71711 | 0.000283 |
| 7                                                   | N | -1.23144 | -1.61016 | 6.01E-05                                            | 7 | N | -1.15031 | -1.46995 | -0.00012 |
| 6                                                   | C | -2.35327 | -0.83954 | 0.000144                                            | 6 | C | -2.23988 | -0.65238 | 0.000675 |
| 7                                                   | N | -2.1642  | 0.541471 | -0.00019                                            | 7 | N | -2.01689 | 0.704355 | -0.00035 |
| 7                                                   | N | 1.814384 | -1.96414 | -0.00044                                            | 7 | N | 1.896871 | -1.92435 | -0.00027 |
| 1                                                   | H | 2.825047 | -1.99108 | 0.002133                                            | 1 | H | 2.90654  | -1.97574 | 0.002199 |
| 1                                                   | H | 1.274528 | -2.82018 | 0.001521                                            | 1 | H | 1.336622 | -2.76601 | 0.001782 |
| 1                                                   | H | 1.952489 | 2.44128  | 0.00041                                             | 1 | H | -3.25454 | -1.05222 | 0.000468 |
| 1                                                   | H | -0.40114 | 2.667024 | -0.00013                                            | 1 | H | -0.19423 | 2.767138 | -0.00041 |
| 6                                                   | C | -3.73452 | -1.36951 | 0.000204                                            | 6 | C | 2.365103 | 2.831912 | 0.000283 |
| 8                                                   | O | -4.03594 | -2.55454 | 0.000184                                            | 8 | O | 3.580983 | 2.853228 | 0.000506 |
| 1                                                   | H | -4.51003 | -0.56183 | 0.000219                                            | 1 | H | 1.761939 | 3.781601 | -0.00011 |



|                   |    |          |          |                                     |    |    |          |                   |          |   |   |                                     |          |          |    |    |          |          |          |   |   |          |          |          |
|-------------------|----|----------|----------|-------------------------------------|----|----|----------|-------------------|----------|---|---|-------------------------------------|----------|----------|----|----|----------|----------|----------|---|---|----------|----------|----------|
| C8-Cl-AD_3H       |    |          |          | E <sub>tot</sub> = -926.720746 a.u. |    |    |          | C2-Cl-AD_3H       |          |   |   | E <sub>tot</sub> = -926.717529 a.u. |          |          |    |    |          |          |          |   |   |          |          |          |
| Gibbs free energy |    |          |          | E <sub>G</sub> = -926.655651 a.u.   |    |    |          | Gibbs free energy |          |   |   | E <sub>G</sub> = -926.65264 a.u.    |          |          |    |    |          |          |          |   |   |          |          |          |
| 7                 | N  | 1.944357 | 0.352402 | 0.000109                            | 7  | N  | 1.950454 | 0.455204          | 1.45E-05 | 6 | C | 1.370993                            | 1.623858 | -0.00016 | 7  | N  | 0.02822  | 1.849829 | -0.00023 | 6 | C | -0.80512 | 0.748054 | -0.00013 |
| 6                 | C  | 1.364181 | 1.534826 | -2.3E-05                            | 6  | C  | -0.23166 | -0.55758          | 1.54E-05 | 6 | C | 1.168044                            | -0.67787 | 1.39E-05 | 7  | N  | -1.25976 | -1.4732  | 0.000397 | 6 | C | -2.35044 | -0.67645 | -0.00026 |
| 7                 | N  | 0.013865 | 1.740684 | -0.0002                             | 7  | N  | -2.14226 | 0.693789          | 0.000212 | 7 | N | 1.811083                            | -1.86767 | -0.00073 | 7  | N  | -2.15773 | 0.586168 | -4E-05   | 7 | N | 1.798506 | -1.97313 | -0.0008  |
| 6                 | C  | -0.81581 | 0.644167 | -0.00016                            | 1  | H  | 2.808502 | -2.00421          | 0.002816 | 1 | H | 1.256972                            | -2.82682 | 0.002393 | 1  | H  | 1.984988 | 2.4335   | 8.62E-05 | 1 | H | 1.984988 | 2.4335   | 8.62E-05 |
| 6                 | C  | -0.2391  | -0.65832 | -1.6E-05                            | 1  | H  | 1.256972 | -2.82682          | 0.002393 | 1 | H | 1.984988                            | 2.4335   | 8.62E-05 | 1  | H  | -0.37152 | 2.681324 | -0.00029 |   |   |          |          |          |
| 6                 | C  | 1.162275 | -0.77821 | 9.3E-06                             | 1  | H  | 1.984988 | 2.4335            | 8.62E-05 | 1 | H | -0.37152                            | 2.681324 | -0.00029 | 17 | Cl | -3.94641 | -1.42896 | 0.00033  |   |   |          |          |          |
| 7                 | N  | -1.26291 | -1.58123 | 0.000195                            | 17 | Cl | -3.94641 | -1.42896          | 0.00033  |   |   |                                     |          |          |    |    |          |          |          |   |   |          |          |          |
| 6                 | C  | -2.34267 | -0.77843 | -7.2E-05                            |    |    |          |                   |          |   |   |                                     |          |          |    |    |          |          |          |   |   |          |          |          |
| 7                 | N  | -2.15773 | 0.586168 | -4E-05                              |    |    |          |                   |          |   |   |                                     |          |          |    |    |          |          |          |   |   |          |          |          |
| 7                 | N  | 1.798506 | -1.97313 | -0.0008                             |    |    |          |                   |          |   |   |                                     |          |          |    |    |          |          |          |   |   |          |          |          |
| 1                 | H  | 2.808502 | -2.00421 | 0.002816                            |    |    |          |                   |          |   |   |                                     |          |          |    |    |          |          |          |   |   |          |          |          |
| 1                 | H  | 1.256972 | -2.82682 | 0.002393                            |    |    |          |                   |          |   |   |                                     |          |          |    |    |          |          |          |   |   |          |          |          |
| 1                 | H  | 1.984988 | 2.4335   | 8.62E-05                            |    |    |          |                   |          |   |   |                                     |          |          |    |    |          |          |          |   |   |          |          |          |
| 1                 | H  | -0.37152 | 2.681324 | -0.00029                            |    |    |          |                   |          |   |   |                                     |          |          |    |    |          |          |          |   |   |          |          |          |
| 17                | Cl | -3.94641 | -1.42896 | 0.00033                             |    |    |          |                   |          |   |   |                                     |          |          |    |    |          |          |          |   |   |          |          |          |
|                   |    |          |          |                                     |    |    |          |                   |          |   |   |                                     |          |          |    |    |          |          |          |   |   |          |          |          |
| C8-F-AD_3H        |    |          |          | E <sub>tot</sub> = -566.294574 a.u. |    |    |          | C2-F-AD_3H        |          |   |   | E <sub>tot</sub> = -566.291563 a.u. |          |          |    |    |          |          |          |   |   |          |          |          |
| Gibbs free energy |    |          |          | E <sub>G</sub> = -566.227142 a.u.   |    |    |          | Gibbs free energy |          |   |   | E <sub>G</sub> = -566.224013 a.u.   |          |          |    |    |          |          |          |   |   |          |          |          |
| 7                 | N  | 1.942541 | 0.352287 | 7.07E-05                            | 7  | N  | 1.957967 | 0.453321          | 6.76E-05 | 6 | C | 1.366241                            | 1.607954 | -6.8E-05 | 7  | N  | 0.033841 | 1.853099 | -0.00018 |   |   |          |          |          |
| 6                 | C  | 1.363983 | 1.534793 | -2.7E-05                            | 6  | C  | -0.80511 | 0.749031          | -9.1E-05 | 6 | C | -0.22844                            | -0.55425 | 4.79E-05 | 6  | C  | 1.170204 | -0.67906 | 5.39E-05 |   |   |          |          |          |
| 7                 | N  | 0.012879 | 1.739995 | -0.00018                            | 6  | C  | -0.22844 | -0.55425          | 4.79E-05 | 7 | N | -1.2581                             | -1.47224 | 0.000544 | 6  | C  | -2.34801 | -0.67897 | -0.0003  |   |   |          |          |          |
| 6                 | C  | -0.81558 | 0.644249 | -0.00016                            | 6  | C  | 1.170204 | -0.67906          | 5.39E-05 | 7 | N | -2.13973                            | 0.694319 | 0.000104 | 7  | N  | 1.809395 | -1.87011 | -0.00046 |   |   |          |          |          |
| 6                 | C  | -0.23934 | -0.65966 | -5E-05                              | 7  | N  | -1.2581  | -1.47224          | 0.000544 | 1 | H | 2.819202                            | -1.9043  | 0.002665 | 1  | H  | 1.26418  | -2.7218  | 0.002154 |   |   |          |          |          |
| 6                 | C  | 1.160367 | -0.77864 | -4.3E-05                            | 6  | C  | -2.34801 | -0.67897          | -0.0003  | 1 | H | 1.26418                             | -2.7218  | 0.002154 | 1  | H  | -3.36023 | -1.08497 | -4.6E-05 |   |   |          |          |          |
| 7                 | N  | -1.26643 | -1.58279 | 0.000145                            | 7  | N  | -2.13973 | 0.694319          | 0.000104 | 1 | H | -3.36023                            | -1.08497 | -4.6E-05 | 1  | H  | -0.32441 | 2.804612 | -0.00022 |   |   |          |          |          |
| 6                 | C  | -2.33029 | -0.77191 | -4.8E-05                            | 7  | N  | 1.809395 | -1.87011          | -0.00046 | 9 | F | 2.119618                            | 2.725312 | 1.69E-05 |    |    |          |          |          |   |   |          |          |          |
| 7                 | N  | -2.15928 | 0.585836 | -3.7E-05                            | 1  | H  | 2.819202 | -1.9043           | 0.002665 |   |   |                                     |          |          |    |    |          |          |          |   |   |          |          |          |
| 7                 | N  | 1.798454 | -1.97405 | -0.0009                             | 1  | H  | 1.26418  | -2.7218           | 0.002154 |   |   |                                     |          |          |    |    |          |          |          |   |   |          |          |          |
| 1                 | H  | 2.808333 | -2.00391 | 0.00292                             | 1  | H  | -3.36023 | -1.08497          | -4.6E-05 |   |   |                                     |          |          |    |    |          |          |          |   |   |          |          |          |
| 1                 | H  | 1.258406 | -2.82847 | 0.002473                            | 1  | H  | -0.32441 | 2.804612          | -0.00022 |   |   |                                     |          |          |    |    |          |          |          |   |   |          |          |          |
| 1                 | H  | 1.984578 | 2.433568 | 8.89E-05                            | 9  | F  | 2.119618 | 2.725312          | 1.69E-05 |   |   |                                     |          |          |    |    |          |          |          |   |   |          |          |          |
| 1                 | H  | -0.37291 | 2.680417 | -0.00026                            |    |    |          |                   |          |   |   |                                     |          |          |    |    |          |          |          |   |   |          |          |          |
| 9                 | F  | -3.57022 | -1.26913 | 0.000298                            |    |    |          |                   |          |   |   |                                     |          |          |    |    |          |          |          |   |   |          |          |          |
|                   |    |          |          |                                     |    |    |          |                   |          |   |   |                                     |          |          |    |    |          |          |          |   |   |          |          |          |
| C8-H-AD_3H        |    |          |          | E <sub>tot</sub> = -467.085495 a.u. |    |    |          | C2-H-AD_3H        |          |   |   | E <sub>tot</sub> = -467.085495 a.u. |          |          |    |    |          |          |          |   |   |          |          |          |
| Gibbs free energy |    |          |          | E <sub>G</sub> = -467.008726 a.u.   |    |    |          | Gibbs free energy |          |   |   | E <sub>G</sub> = -467.008726 a.u.   |          |          |    |    |          |          |          |   |   |          |          |          |
| 7                 | N  | 1.956751 | 0.45435  | 0.000391                            | 7  | N  | 1.956751 | 0.45435           | 0.000391 | 6 | C | 1.376085                            | 1.637636 | 0.000118 | 7  | N  | 0.027617 | 1.844188 | -0.00022 |   |   |          |          |          |
| 6                 | C  | 1.376085 | 1.637636 | 0.000118                            | 6  | C  | -0.80757 | 0.749745          | 0.000092 | 6 | C | -0.80757                            | 0.749745 | 0.000092 | 6  | C  | -0.23136 | -0.55468 | 0.000106 |   |   |          |          |          |
| 7                 | N  | 0.027617 | 1.844188 | -0.00022                            | 6  | C  | -0.23136 | -0.55468          | 0.000106 | 6 | C | 1.170301                            | -0.6737  | -6.9E-05 | 7  | N  | -1.256   | -1.47343 | 0.000079 |   |   |          |          |          |
| 6                 | C  | -0.80757 | 0.749745 | 0.000092                            | 6  | C  | 1.170301 | -0.6737           | -6.9E-05 | 7 | N | -1.256                              | -1.47343 | 0.000079 | 6  | C  | -2.3504  | -0.67884 | 0.000098 |   |   |          |          |          |
| 6                 | C  | -0.23136 | -0.55468 | 0.000106                            | 7  | N  | -1.256   | -1.47343          | 0.000079 | 6 | C | -2.3504                             | -0.67884 | 0.000098 | 7  | N  | -2.14758 | 0.689367 | -5.4E-05 |   |   |          |          |          |
| 6                 | C  | 1.170301 | -0.6737  | -6.9E-05                            | 6  | C  | -2.3504  | -0.67884          | 0.000098 | 7 | N | 1.805039                            | -1.86988 | -0.00118 | 7  | N  | 1.805039 | -1.86988 | -0.00118 |   |   |          |          |          |
| 7                 | N  | -1.256   | -1.47343 | 0.000079                            | 7  | N  | -2.14758 | 0.689367          | -5.4E-05 | 1 | H | 2.814875                            | -1.90314 | 0.00295  | 1  | H  | 2.814875 | -1.90314 | 0.00295  |   |   |          |          |          |
| 6                 | C  | -2.3504  | -0.67884 | 0.000098                            | 7  | N  | 1.805039 | -1.86988          | -0.00118 | 1 | H | 1.259925                            | -2.72134 | 0.002325 | 1  | H  | 1.259925 | -2.72134 | 0.002325 |   |   |          |          |          |
| 7                 | N  | -2.14758 | 0.689367 | -5.4E-05                            | 1  | H  | 2.814875 | -1.90314          | 0.00295  | 1 | H | 1.998167                            | 2.535542 | 0.000062 | 1  | H  | 1.998167 | 2.535542 | 0.000062 |   |   |          |          |          |
| 7                 | N  | 1.805039 | -1.86988 | -0.00118                            | 1  | H  | 1.259925 | -2.72134          | 0.002325 | 1 | H | -3.3607                             | -1.09023 | 0.000181 | 1  | H  | -3.3607  | -1.09023 | 0.000181 |   |   |          |          |          |
| 1                 | H  | 2.814875 | -1.90314 | 0.00295                             | 1  | H  | 1.998167 | 2.535542          | 0.000062 | 1 | H | -3.3607                             | -1.09023 | 0.000181 | 1  | H  | -0.35538 | 2.786045 | -0.00071 |   |   |          |          |          |
| 1                 | H  | 1.259925 | -2.72134 | 0.002325                            | 1  | H  | -3.3607  | -1.09023          | 0.000181 | 1 | H | -0.35538                            | 2.786045 | -0.00071 |    |    |          |          |          |   |   |          |          |          |
| 1                 | H  | 1.998167 | 2.535542 | 0.000062                            | 1  | H  | -0.35538 | 2.786045          | -0.00071 |   |   |                                     |          |          |    |    |          |          |          |   |   |          |          |          |
| 1                 | H  | -3.3607  | -1.09023 | 0.000181                            |    |    |          |                   |          |   |   |                                     |          |          |    |    |          |          |          |   |   |          |          |          |
| 1                 | H  | -0.35538 | 2.786045 | -0.00071                            |    |    |          |                   |          |   |   |                                     |          |          |    |    |          |          |          |   |   |          |          |          |

|                   |   |          |          |                                     |   |   |          |                   |          |   |   |                                     |          |          |   |   |          |          |          |
|-------------------|---|----------|----------|-------------------------------------|---|---|----------|-------------------|----------|---|---|-------------------------------------|----------|----------|---|---|----------|----------|----------|
| C8-Me-AD_3H       |   |          |          | E <sub>tot</sub> = -506.386585 a.u. |   |   |          | C2-Me-AD_3H       |          |   |   | E <sub>tot</sub> = -506.386326 a.u. |          |          |   |   |          |          |          |
| Gibbs free energy |   |          |          | E <sub>G</sub> = -506.287823 a.u.   |   |   |          | Gibbs free energy |          |   |   | E <sub>G</sub> = -506.284818 a.u.   |          |          |   |   |          |          |          |
| 7                 | N | 1.954797 | 0.453989 | 0.008523                            | 7 | N | 1.95918  | 0.443145          | 8.43E-05 | 7 | N | 1.399987                            | 1.643224 | -2.9E-05 | 7 | N | 0.044053 | 1.835623 | -0.00016 |
| 6                 | C | 1.375169 | 1.634386 | -0.06502                            | 6 | C | -0.79668 | 0.744786          | -0.00013 | 6 | C | -0.2308                             | -0.56118 | -3.2E-05 | 6 | C | 1.168214 | -0.68058 | -3E-05   |
| 7                 | N | 0.024862 | 1.838206 | -0.1008                             | 6 | C | -1.2631  | -1.47542          | 0.00029  | 6 | C | -2.3506                             | -0.67425 | -0.0002  | 7 | N | -2.13681 | 0.694627 | 0.000121 |
| 6                 | C | -0.80932 | 0.744414 | -0.05774                            | 7 | N | 1.802556 | -1.87821          | -0.00089 | 7 | N | 2.812195                            | -1.91235 | 0.003031 | 7 | N | 1.802556 | -1.87821 | -0.00089 |
| 6                 | C | -0.23152 | -0.55755 | 0.022239                            | 1 | H | 2.812195 | -1.91235          | 0.003031 | 1 | H | 1.256466                            | -2.7289  | 0.002404 | 1 | H | 2.812195 | -1.91235 | 0.003031 |
| 6                 | C | 1.167758 | -0.6739  | 0.054013                            | 1 | H | 1.256466 | -2.7289           | 0.002404 | 1 | H | -3.36432                            | -1.07729 | 3.44E-05 | 1 | H | 1.256466 | -2.7289  | 0.002404 |
| 7                 | N | -1.25768 | -1.47401 | 0.052735                            | 1 | H | -3.36432 | -1.07729          | 3.44E-05 | 1 | H | -0.34402                            | 2.775182 | -0.0002  | 1 | H | -3.36432 | -1.07729 | 3.44E-05 |
| 6                 | C | -2.36309 | -0.69055 | -0.00902                            | 1 | H | -0.34402 | 2.775182          | -0.0002  | 6 | C | 2.26599                             | 2.872665 | 0.000124 | 6 | C | 2.26599  | 2.872665 | 0.000124 |
| 7                 | N | -2.14606 | 0.682377 | -0.07864                            | 6 | C | 2.26599  | 2.872665          | 0.000124 | 1 | H | 2.07211                             | 3.4929   | -0.89176 | 1 | H | 2.07211  | 3.4929   | -0.89176 |
| 7                 | N | 1.805493 | -1.86874 | 0.127953                            | 1 | H | 2.07211  | 3.4929            | -0.89176 | 1 | H | 2.071441                            | 3.493193 | 0.89166  | 1 | H | 2.071441 | 3.493193 | 0.89166  |
| 1                 | H | 2.814837 | -1.89899 | 0.15448                             | 1 | H | 2.071441 | 3.493193          | 0.89166  | 1 | H | 3.318827                            | 2.567453 | 0.000549 | 1 | H | 3.318827 | 2.567453 | 0.000549 |
| 1                 | H | 1.261789 | -2.71973 | 0.168963                            | 1 | H | 3.318827 | 2.567453          | 0.000549 |   |   |                                     |          |          |   |   |          |          |          |
| 1                 | H | 1.995881 | 2.532558 | -0.10139                            |   |   |          |                   |          |   |   |                                     |          |          |   |   |          |          |          |
| 1                 | H | -0.35857 | 2.777819 | -0.15788                            |   |   |          |                   |          |   |   |                                     |          |          |   |   |          |          |          |
| 6                 | C | -3.74914 | -1.24938 | -0.00394                            |   |   |          |                   |          |   |   |                                     |          |          |   |   |          |          |          |
| 1                 | H | -4.29001 | -0.94927 | -0.91729                            |   |   |          |                   |          |   |   |                                     |          |          |   |   |          |          |          |
| 1                 | H | -3.71157 | -2.34536 | 0.054097                            |   |   |          |                   |          |   |   |                                     |          |          |   |   |          |          |          |
| 1                 | H | -4.3209  | -0.8564  | 0.853658                            |   |   |          |                   |          |   |   |                                     |          |          |   |   |          |          |          |
|                   |   |          |          |                                     |   |   |          |                   |          |   |   |                                     |          |          |   |   |          |          |          |
| C8-OMe-AD_3H      |   |          |          | E <sub>tot</sub> = -581.568580 a.u. |   |   |          | C2-OMe-AD_3H      |          |   |   | E <sub>tot</sub> = -581.570115 a.u. |          |          |   |   |          |          |          |
| Gibbs free energy |   |          |          | E <sub>G</sub> = -581.463461 a.u.   |   |   |          | Gibbs free energy |          |   |   | E <sub>G</sub> = -581.466612 a.u.   |          |          |   |   |          |          |          |
| 7                 | N | 1.963561 | 0.389726 | -0.00019                            | 7 | N | 1.972319 | 0.350517          | 9.59E-05 | 7 | N | 1.430021                            | 1.549325 | 1.33E-05 | 7 | N | 0.090666 | 1.809088 | -0.0002  |
| 6                 | C | 1.35879  | 1.557638 | -0.00017                            | 6 | C | -0.77874 | 0.733367          | -0.00018 | 6 | C | -0.24618                            | -0.58595 | -0.00011 | 6 | C | 1.147034 | -0.74958 | -8.7E-05 |
| 7                 | N | 0.000397 | 1.728438 | -0.00018                            | 6 | C | -0.24618 | -0.58595          | -0.00011 | 6 | C | 1.147034                            | -0.74958 | -8.7E-05 | 7 | N | -1.30516 | -1.47431 | 4.05E-05 |
| 6                 | C | -0.80373 | 0.614591 | -0.0001                             | 7 | N | -1.30516 | -1.47431          | 4.05E-05 | 7 | N | -2.11641                            | 0.719831 | -0.00011 | 6 | C | -2.36813 | -0.6465  | 0.000204 |
| 6                 | C | -0.19406 | -0.67632 | -0.00013                            | 6 | C | -2.36813 | -0.6465           | 0.000204 | 7 | N | -2.11641                            | 0.719831 | -0.00011 | 7 | N | 1.743392 | -1.96645 | -0.001   |
| 6                 | C | 1.205376 | -0.7593  | -0.00027                            | 7 | N | 1.743392 | -1.96645          | -0.001   | 1 | H | 2.750674                            | -2.03878 | 0.003198 | 1 | H | 1.1662   | -2.79647 | 0.002294 |
| 7                 | N | -1.19917 | -1.62098 | 0.000143                            | 1 | H | 2.750674 | -2.03878          | 0.003198 | 1 | H | 1.1662                              | -2.79647 | 0.002294 | 1 | H | -3.39292 | -1.02014 | 0.000323 |
| 6                 | C | -2.30466 | -0.84079 | 0.000325                            | 1 | H | 1.1662   | -2.79647          | 0.002294 | 1 | H | -3.39292                            | -1.02014 | 0.000323 | 1 | H | -0.24321 | 2.768701 | -0.0003  |
| 7                 | N | -2.14046 | 0.531152 | 0.000152                            | 1 | H | -3.39292 | -1.02014          | 0.000323 | 1 | H | -0.24321                            | 2.768701 | -0.0003  | 8 | O | 2.17722  | 2.672715 | 0.000137 |
| 7                 | N | 1.877612 | -1.94142 | -0.00137                            | 8 | O | 2.17722  | 2.672715          | 0.000137 | 6 | C | 3.612384                            | 2.486442 | 0.000139 | 6 | C | 3.612384 | 2.486442 | 0.000139 |
| 1                 | H | 2.887446 | -1.94351 | 0.003466                            | 6 | C | 3.612384 | 2.486442          | 0.000139 | 1 | H | 4.023796                            | 3.502865 | 9.38E-05 | 1 | H | 4.023796 | 3.502865 | 9.38E-05 |
| 1                 | H | 1.36116  | -2.80944 | 0.003                               | 1 | H | 4.023796 | 3.502865          | 9.38E-05 | 1 | H | 3.925099                            | 1.934533 | 0.89874  | 1 | H | 3.925099 | 1.934533 | 0.89874  |
| 1                 | H | 1.956032 | 2.472018 | -9.8E-05                            | 1 | H | 3.925099 | 1.934533          | 0.89874  | 1 | H | 3.92509                             | 1.934444 | -0.89841 | 1 | H | 3.92509  | 1.934444 | -0.89841 |
| 1                 | H | -0.40913 | 2.658534 | -0.00015                            | 1 | H | 3.92509  | 1.934444          | -0.89841 |   |   |                                     |          |          |   |   |          |          |          |
| 8                 | O | -3.55835 | -1.32005 | 0.000564                            |   |   |          |                   |          |   |   |                                     |          |          |   |   |          |          |          |
| 6                 | C | -3.67081 | -2.75833 | 0.000611                            |   |   |          |                   |          |   |   |                                     |          |          |   |   |          |          |          |
| 1                 | H | -4.74906 | -2.96214 | 0.000787                            |   |   |          |                   |          |   |   |                                     |          |          |   |   |          |          |          |
| 1                 | H | -3.19248 | -3.1814  | -0.89676                            |   |   |          |                   |          |   |   |                                     |          |          |   |   |          |          |          |
| 1                 | H | -3.1922  | -3.18137 | 0.897846                            |   |   |          |                   |          |   |   |                                     |          |          |   |   |          |          |          |

|                   |   |          |          |                                     |   |   |          |                   |          |   |   |                                     |          |          |   |   |          |          |          |
|-------------------|---|----------|----------|-------------------------------------|---|---|----------|-------------------|----------|---|---|-------------------------------------|----------|----------|---|---|----------|----------|----------|
| C8-OMe-AD_3H      |   |          |          | E <sub>tot</sub> = -581.567454 a.u. |   |   |          | C2-OMe-AD_3H      |          |   |   | E <sub>tot</sub> = -581.561330 a.u. |          |          |   |   |          |          |          |
| Gibbs free energy |   |          |          | E <sub>G</sub> = -581.462549 a.u.   |   |   |          | Gibbs free energy |          |   |   | E <sub>G</sub> = -581.456966 a.u.   |          |          |   |   |          |          |          |
| 7                 | N | 1.911482 | 0.354717 | 4.32E-06                            | 7 | N | 1.9477   | 0.481835          | 0.000191 | 7 | N | 1.9477                              | 0.481835 | 0.000191 | 7 | N | 1.9477   | 0.481835 | 0.000191 |
| 6                 | C | 1.331842 | 1.536397 | -3.9E-05                            | 6 | C | 1.366897 | 1.662344          | 7.29E-05 | 6 | C | 1.366897                            | 1.662344 | 7.29E-05 | 6 | C | 1.366897 | 1.662344 | 7.29E-05 |
| 7                 | N | -0.02353 | 1.733605 | -0.0002                             | 7 | N | 0.014045 | 1.864121          | -0.00019 | 7 | N | 0.014045                            | 1.864121 | -0.00019 | 7 | N | 0.014045 | 1.864121 | -0.00019 |
| 6                 | C | -0.84858 | 0.636522 | -0.0002                             | 6 | C | -0.81    | 0.748831          | -0.00018 | 6 | C | -0.81                               | 0.748831 | -0.00018 | 6 | C | -0.81    | 0.748831 | -0.00018 |
| 6                 | C | -0.26936 | -0.66658 | -0.00016                            | 6 | C | -0.23038 | -0.54511          | -7.5E-05 | 6 | C | -0.23038                            | -0.54511 | -7.5E-05 | 6 | C | -0.23038 | -0.54511 | -7.5E-05 |
| 6                 | C | 1.131282 | -0.777   | -0.00017                            | 6 | C | 1.172361 | -0.64724          | -1.5E-05 | 6 | C | 1.172361                            | -0.64724 | -1.5E-05 | 6 | C | 1.172361 | -0.64724 | -1.5E-05 |
| 7                 | N | -1.28568 | -1.5933  | 2.28E-07                            | 7 | N | -1.25511 | -1.47156          | 1.79E-05 | 7 | N | -1.25511                            | -1.47156 | 1.79E-05 | 7 | N | -1.25511 | -1.47156 | 1.79E-05 |
| 6                 | C | -2.37806 | -0.7983  | 3.93E-05                            | 6 | C | -2.34964 | -0.68392          | 0.000209 | 6 | C | -2.34964                            | -0.68392 | 0.000209 | 6 | C | -2.34964 | -0.68392 | 0.000209 |
| 7                 | N | -2.19006 | 0.573896 | -8.9E-05                            | 7 | N | -2.14749 | 0.689696          | -0.00017 | 7 | N | -2.14749                            | 0.689696 | -0.00017 | 7 | N | -2.14749 | 0.689696 | -0.00017 |
| 7                 | N | 1.772294 | -1.97474 | -0.0012                             | 7 | N | 1.819045 | -1.83699          | -0.00086 | 7 | N | 1.819045                            | -1.83699 | -0.00086 | 7 | N | 1.819045 | -1.83699 | -0.00086 |
| 1                 | H | 2.781738 | -2.00424 | 0.003298                            | 1 | H | 2.828967 | -1.8623           | 0.002943 | 1 | H | 2.828967                            | -1.8623  | 0.002943 | 1 | H | 2.828967 | -1.8623  | 0.002943 |
| 1                 | H | 1.231138 | -2.82816 | 0.002701                            | 1 | H | 1.279739 | -2.692            | 0.002245 | 1 | H | 1.279739                            | -2.692   | 0.002245 | 1 | H | 1.279739 | -2.692   | 0.002245 |
| 1                 | H | 1.947266 | 2.438427 | 0.000106                            | 1 | H | -3.35979 | -1.09528          | 0.000293 | 1 | H | -3.35979                            | -1.09528 | 0.000293 | 1 | H | -3.35979 | -1.09528 | 0.000293 |
| 1                 | H | -0.41277 | 2.672344 | -0.00022                            | 1 | H | -0.4007  | 2.789942          | -0.00037 | 1 | H | -0.4007                             | 2.789942 | -0.00037 | 1 | H | -0.4007  | 2.789942 | -0.00037 |
| 8                 | O | -3.60085 | -1.35377 | 0.000148                            | 8 | O | 2.201475 | 2.728761          | 0.000215 | 8 | O | 2.201475                            | 2.728761 | 0.000215 | 8 | O | 2.201475 | 2.728761 | 0.000215 |
| 6                 | C | -4.71392 | -0.4369  | 4.29E-05                            | 6 | C | 1.638062 | 4.050814          | 0.000236 | 6 | C | 1.638062                            | 4.050814 | 0.000236 | 6 | C | 1.638062 | 4.050814 | 0.000236 |
| 1                 | H | -5.60828 | -1.07304 | 9.92E-05                            | 1 | H | 1.034304 | 4.225987          | 0.908501 | 1 | H | 1.034304                            | 4.225987 | 0.908501 | 1 | H | 1.034304 | 4.225987 | 0.908501 |
| 1                 | H | -4.69055 | 0.200911 | 0.897632                            | 1 | H | 2.49843  | 4.730291          | 0.000473 | 1 | H | 2.49843                             | 4.730291 | 0.000473 | 1 | H | 2.49843  | 4.730291 | 0.000473 |
| 1                 | H | -4.69053 | 0.200726 | -0.89768                            | 1 | H | 1.034679 | 4.226169          | -0.90824 | 1 | H | 1.034679                            | 4.226169 | -0.90824 | 1 | H | 1.034679 | 4.226169 | -0.90824 |
| C8-OH-AD_3H       |   |          |          | E <sub>tot</sub> = -542.293445 a.u. |   |   |          | C2-OH-AD_3H       |          |   |   | E <sub>tot</sub> = -542.294453 a.u. |          |          |   |   |          |          |          |
| Gibbs free energy |   |          |          | E <sub>G</sub> = -542.213071 a.u.   |   |   |          | Gibbs free energy |          |   |   | E <sub>G</sub> = -542.214882 a.u.   |          |          |   |   |          |          |          |
| 7                 | N | 1.934924 | 0.348774 | -8.3E-05                            | 7 | N | 1.968854 | 0.453897          | 7.3E-05  | 7 | N | 1.968854                            | 0.453897 | 7.3E-05  | 7 | N | 1.968854 | 0.453897 | 7.3E-05  |
| 6                 | C | 1.355988 | 1.53011  | -7.8E-05                            | 6 | C | 1.385327 | 1.633357          | -1.7E-05 | 6 | C | 1.385327                            | 1.633357 | -1.7E-05 | 6 | C | 1.385327 | 1.633357 | -1.7E-05 |
| 7                 | N | 0.001826 | 1.729642 | -0.00014                            | 7 | N | 0.045903 | 1.857692          | -0.00017 | 7 | N | 0.045903                            | 1.857692 | -0.00017 | 7 | N | 0.045903 | 1.857692 | -0.00017 |
| 6                 | C | -0.82508 | 0.633955 | -0.0001                             | 6 | C | -0.7914  | 0.753656          | -0.00014 | 6 | C | -0.7914                             | 0.753656 | -0.00014 | 6 | C | -0.7914  | 0.753656 | -0.00014 |
| 6                 | C | -0.24513 | -0.67025 | -0.00012                            | 6 | C | -0.21904 | -0.54857          | -6E-05   | 6 | C | -0.21904                            | -0.54857 | -6E-05   | 6 | C | -0.21904 | -0.54857 | -6E-05   |
| 6                 | C | 1.15324  | -0.78329 | -0.00021                            | 6 | C | 1.17952  | -0.67293          | -7.1E-05 | 6 | C | 1.17952                             | -0.67293 | -7.1E-05 | 6 | C | 1.17952  | -0.67293 | -7.1E-05 |
| 7                 | N | -1.27473 | -1.58889 | 6.76E-05                            | 7 | N | -1.24993 | -1.46756          | 0.000195 | 7 | N | -1.24993                            | -1.46756 | 0.000195 | 7 | N | -1.24993 | -1.46756 | 0.000195 |
| 6                 | C | -2.35902 | -0.78148 | 0.000226                            | 6 | C | -2.33808 | -0.67222          | -1.9E-06 | 6 | C | -2.33808                            | -0.67222 | -1.9E-06 | 6 | C | -2.33808 | -0.67222 | -1.9E-06 |
| 7                 | N | -2.16657 | 0.580325 | 5.82E-05                            | 7 | N | -2.12743 | 0.700435          | 1.67E-06 | 7 | N | -2.12743                            | 0.700435 | 1.67E-06 | 7 | N | -2.12743 | 0.700435 | 1.67E-06 |
| 7                 | N | 1.798972 | -1.97935 | -0.0013                             | 7 | N | 1.810886 | -1.87047          | -0.00092 | 7 | N | 1.810886                            | -1.87047 | -0.00092 | 7 | N | 1.810886 | -1.87047 | -0.00092 |
| 1                 | H | 2.808652 | -2.00346 | 0.003208                            | 1 | H | 2.819879 | -1.91484          | 0.003085 | 1 | H | 2.819879                            | -1.91484 | 0.003085 | 1 | H | 2.819879 | -1.91484 | 0.003085 |
| 1                 | H | 1.264406 | -2.83639 | 0.00286                             | 1 | H | 1.257632 | -2.71676          | 0.002307 | 1 | H | 1.257632                            | -2.71676 | 0.002307 | 1 | H | 1.257632 | -2.71676 | 0.002307 |
| 1                 | H | 1.972889 | 2.431247 | 2.09E-05                            | 1 | H | -3.35077 | -1.0771           | 0.000163 | 1 | H | -3.35077                            | -1.0771  | 0.000163 | 1 | H | -3.35077 | -1.0771  | 0.000163 |
| 1                 | H | -0.38786 | 2.668285 | -0.00014                            | 1 | H | -0.31788 | 2.806515          | -0.00026 | 1 | H | -0.31788                            | 2.806515 | -0.00026 | 1 | H | -0.31788 | 2.806515 | -0.00026 |
| 8                 | O | -3.61798 | -1.26582 | 0.000321                            | 8 | O | 2.131843 | 2.763371          | 0.000128 | 8 | O | 2.131843                            | 2.763371 | 0.000128 | 8 | O | 2.131843 | 2.763371 | 0.000128 |
| 1                 | H | -3.53189 | -2.23418 | 0.000267                            | 1 | H | 3.059969 | 2.470606          | 0.000138 | 1 | H | 3.059969                            | 2.470606 | 0.000138 | 1 | H | 3.059969 | 2.470606 | 0.000138 |

|                           |   |          |          |                                     |   |   |          |                           |          |   |   |                                     |          |          |   |   |          |          |          |
|---------------------------|---|----------|----------|-------------------------------------|---|---|----------|---------------------------|----------|---|---|-------------------------------------|----------|----------|---|---|----------|----------|----------|
| C8-OH-AD_3H               |   |          |          | E <sub>tot</sub> = -542.293128 a.u. |   |   |          | C2-OH-AD_3H               |          |   |   | E <sub>tot</sub> = -542.283675 a.u. |          |          |   |   |          |          |          |
| Gibbs free energy         |   |          |          | E <sub>G</sub> = -542.212789 a.u.   |   |   |          | Gibbs free energy         |          |   |   | E <sub>G</sub> = -542.204802 a.u.   |          |          |   |   |          |          |          |
| 7                         | N | 1.922788 | 0.354763 | 4.54E-06                            | 7 | N | 1.964607 | 0.463798                  | 0.00027  | 6 | C | 1.39449                             | 1.644117 | 0.000111 | 6 | C | 1.39449  | 1.644117 | 0.000111 |
| 6                         | C | 1.340122 | 1.534107 | -2.4E-05                            | 6 | C | 1.39449  | 1.644117                  | 0.000111 | 7 | N | 0.04325                             | 1.86271  | -0.00025 | 7 | N | 0.04325  | 1.86271  | -0.00025 |
| 7                         | N | -0.01548 | 1.729401 | -0.00017                            | 6 | C | -0.79402 | 0.756556                  | -0.00023 | 6 | C | -0.79402                            | 0.756556 | -0.00023 |   |   |          |          |          |
| 6                         | C | -0.83797 | 0.630419 | -0.00017                            | 6 | C | -0.22381 | -0.54337                  | -5E-05   | 6 | C | -0.22381                            | -0.54337 | -5E-05   |   |   |          |          |          |
| 6                         | C | -0.25466 | -0.67159 | -0.00014                            | 6 | C | 1.176196 | -0.66004                  | 4.97E-05 | 6 | C | 1.176196                            | -0.66004 | 4.97E-05 |   |   |          |          |          |
| 6                         | C | 1.144958 | -0.77974 | -0.00017                            | 7 | N | -1.25686 | -1.46086                  | -5.6E-05 | 7 | N | -1.25686                            | -1.46086 | -5.6E-05 |   |   |          |          |          |
| 7                         | N | -1.27096 | -1.60349 | 3.63E-05                            | 6 | C | -2.34413 | -0.66477                  | 0.000391 | 6 | C | -2.34413                            | -0.66477 | 0.000391 |   |   |          |          |          |
| 6                         | C | -2.35872 | -0.81255 | 0.000115                            | 7 | N | -2.13049 | 0.708216                  | -0.00035 | 7 | N | -2.13049                            | 0.708216 | -0.00035 |   |   |          |          |          |
| 7                         | N | -2.17942 | 0.55955  | -6E-05                              | 7 | N | 1.813559 | -1.85371                  | -0.00075 | 7 | N | 1.813559                            | -1.85371 | -0.00075 |   |   |          |          |          |
| 7                         | N | 1.789539 | -1.97505 | -0.00119                            | 1 | H | 2.823354 | -1.88665                  | 0.002853 | 1 | H | 2.823354                            | -1.88665 | 0.002853 |   |   |          |          |          |
| 1                         | H | 2.799118 | -2.00139 | 0.003203                            | 1 | H | 1.267863 | -2.70481                  | 0.002127 | 1 | H | 1.267863                            | -2.70481 | 0.002127 |   |   |          |          |          |
| 1                         | H | 1.251452 | -2.83045 | 0.00263                             | 1 | H | -3.35773 | -1.0674                   | 0.000406 | 1 | H | -3.35773                            | -1.0674  | 0.000406 |   |   |          |          |          |
| 1                         | H | 1.953747 | 2.437498 | 0.000113                            | 1 | H | -0.36148 | 2.795377                  | -0.00056 | 1 | H | -0.36148                            | 2.795377 | -0.00056 |   |   |          |          |          |
| 1                         | H | -0.40569 | 2.66766  | -0.0002                             | 8 | O | 2.22568  | 2.719664                  | 0.000211 | 8 | O | 2.22568                             | 2.719664 | 0.000211 |   |   |          |          |          |
| 8                         | O | -3.60183 | -1.33767 | 0.000226                            | 1 | H | 1.719766 | 3.546861                  | 0.000327 | 1 | H | 1.719766                            | 3.546861 | 0.000327 |   |   |          |          |          |
| 1                         | H | -4.21458 | -0.58336 | 0.000178                            |   |   |          |                           |          |   |   |                                     |          |          |   |   |          |          |          |
| C8-NH <sub>2</sub> -AD_3H |   |          |          | E <sub>tot</sub> = -522.433418 a.u. |   |   |          | C2-NH <sub>2</sub> -AD_3H |          |   |   | E <sub>tot</sub> = -522.430863 a.u. |          |          |   |   |          |          |          |
| Gibbs free energy         |   |          |          | E <sub>G</sub> = -522.342048 a.u.   |   |   |          | Gibbs free energy         |          |   |   | E <sub>G</sub> = -522.340542 a.u.   |          |          |   |   |          |          |          |
| 7                         | N | 1.93107  | 0.352474 | -0.00023                            | 7 | N | 1.966316 | 0.465645                  | 0.000243 | 6 | C | 1.390457                            | 1.661822 | 0.000166 | 6 | C | 1.390457 | 1.661822 | 0.000166 |
| 6                         | C | 1.353137 | 1.533539 | -0.00011                            | 6 | C | 1.390457 | 1.661822                  | 0.000166 | 7 | N | 0.033981                            | 1.862307 | -0.00028 | 7 | N | 0.033981 | 1.862307 | -0.00028 |
| 7                         | N | -0.00483 | 1.729538 | -0.00011                            | 6 | C | -0.79571 | 0.75248                   | -0.00029 | 6 | C | -0.79571                            | 0.75248  | -0.00029 |   |   |          |          |          |
| 6                         | C | -0.83102 | 0.633961 | -8.8E-05                            | 6 | C | -0.22137 | -0.54341                  | -0.00019 | 6 | C | -0.22137                            | -0.54341 | -0.00019 |   |   |          |          |          |
| 6                         | C | -0.24918 | -0.67086 | -0.00021                            | 6 | C | 1.179641 | -0.65437                  | -0.0001  | 6 | C | 1.179641                            | -0.65437 | -0.0001  |   |   |          |          |          |
| 6                         | C | 1.149167 | -0.77941 | -0.0004                             | 7 | N | -1.25092 | -1.468                    | -0.0003  | 7 | N | -1.25092                            | -1.468   | -0.0003  |   |   |          |          |          |
| 7                         | N | -1.26969 | -1.59557 | 2.96E-06                            | 6 | C | -2.34115 | -0.67718                  | 0.000657 | 6 | C | -2.34115                            | -0.67718 | 0.000657 |   |   |          |          |          |
| 6                         | C | -2.37073 | -0.79957 | 0.000326                            | 7 | N | -2.13319 | 0.697315                  | -0.0005  | 7 | N | -2.13319                            | 0.697315 | -0.0005  |   |   |          |          |          |
| 7                         | N | -2.17035 | 0.5758   | 0.000117                            | 7 | N | 1.812928 | -1.85314                  | -0.00106 | 7 | N | 1.812928                            | -1.85314 | -0.00106 |   |   |          |          |          |
| 7                         | N | 1.794946 | -1.97929 | -0.00172                            | 1 | H | 2.822017 | -1.89293                  | 0.003175 | 1 | H | 2.822017                            | -1.89293 | 0.003175 |   |   |          |          |          |
| 1                         | H | 2.804145 | -2.00587 | 0.003595                            | 1 | H | 1.261686 | -2.70044                  | 0.002213 | 1 | H | 1.261686                            | -2.70044 | 0.002213 |   |   |          |          |          |
| 1                         | H | 1.256935 | -2.83394 | 0.003155                            | 1 | H | -3.35319 | -1.08401                  | 0.000661 | 1 | H | -3.35319                            | -1.08401 | 0.000661 |   |   |          |          |          |
| 1                         | H | 1.96726  | 2.436377 | 1.59E-05                            | 1 | H | -0.37087 | 2.793687                  | -0.00058 | 1 | H | -0.37087                            | 2.793687 | -0.00058 |   |   |          |          |          |
| 1                         | H | -0.39467 | 2.667754 | -4E-05                              | 7 | N | 2.196452 | 2.769199                  | 0.000185 | 7 | N | 2.196452                            | 2.769199 | 0.000185 |   |   |          |          |          |
| 7                         | N | -3.636   | -1.30589 | 0.000474                            | 1 | H | 3.194702 | 2.622362                  | 0.000326 | 1 | H | 3.194702                            | 2.622362 | 0.000326 |   |   |          |          |          |
| 1                         | H | -3.77374 | -2.30456 | 7.16E-05                            | 1 | H | 1.833103 | 3.709533                  | 0.000344 | 1 | H | 1.833103                            | 3.709533 | 0.000344 |   |   |          |          |          |
| 1                         | H | -4.42638 | -0.68041 | 0.000128                            |   |   |          |                           |          |   |   |                                     |          |          |   |   |          |          |          |

|                           |   |          |          |                                     |   |   |          |                           |          |   |   |                                     |          |          |   |   |          |          |          |
|---------------------------|---|----------|----------|-------------------------------------|---|---|----------|---------------------------|----------|---|---|-------------------------------------|----------|----------|---|---|----------|----------|----------|
| C8-NO <sub>2</sub> -AD_1H |   |          |          | E <sub>tot</sub> = -671.500835 a.u. |   |   |          | C2-NO <sub>2</sub> -AD_1H |          |   |   | E <sub>tot</sub> = -671.504987 a.u. |          |          |   |   |          |          |          |
| Gibbs free energy         |   |          |          | E <sub>G</sub> = -671.428109 a.u.   |   |   |          | Gibbs free energy         |          |   |   | E <sub>G</sub> = -671.430871 a.u.   |          |          |   |   |          |          |          |
| 7                         | N | 1.834676 | -0.48512 | 0.014291                            | 7 | N | 1.821619 | -0.51578                  | 0.020951 | 6 | C | 1.181953                            | -1.74067 | 0.006213 | 6 | C | 1.181953 | -1.74067 | 0.006213 |
| 6                         | C | 1.226675 | -1.74285 | 0.03459                             | 7 | N | -0.10129 | -1.9492                   | -0.00893 | 6 | C | -0.84489                            | -0.80942 | -0.01002 | 7 | N | -0.10129 | -1.9492  | -0.00893 |
| 7                         | N | -0.06008 | -1.94874 | 0.036463                            | 6 | C | -0.26955 | 0.522251                  | 0.00551  | 6 | C | -0.26955                            | 0.522251 | 0.00551  |   |   |          |          |          |
| 6                         | C | -0.82134 | -0.80815 | 0.014241                            | 6 | C | 1.123324 | 0.664806                  | 0.021758 | 6 | C | 1.123324                            | 0.664806 | 0.021758 |   |   |          |          |          |
| 6                         | C | -0.2636  | 0.524884 | -0.00218                            | 7 | N | -1.26139 | 1.450247                  | 0.012589 | 7 | N | -1.26139                            | 1.450247 | 0.012589 |   |   |          |          |          |
| 6                         | C | 1.121792 | 0.69155  | -0.00311                            | 6 | C | -2.37767 | 0.656213                  | -0.00137 | 6 | C | -2.37767                            | 0.656213 | -0.00137 |   |   |          |          |          |
| 7                         | N | -1.26678 | 1.45127  | 0.005142                            | 7 | N | -2.19569 | -0.69466                  | -0.01409 | 7 | N | -2.19569                            | -0.69466 | -0.01409 |   |   |          |          |          |
| 6                         | C | -2.34183 | 0.637259 | 0.014035                            | 7 | N | 1.779484 | 1.851849                  | -0.00352 | 7 | N | 1.779484                            | 1.851849 | -0.00352 |   |   |          |          |          |
| 7                         | N | -2.16766 | -0.71415 | 0.019853                            | 1 | H | 2.75937  | 1.920913                  | 0.238398 | 1 | H | 2.75937                             | 1.920913 | 0.238398 |   |   |          |          |          |
| 7                         | N | 1.760681 | 1.890938 | -0.06918                            | 1 | H | 1.205111 | 2.67876                   | 0.114596 | 1 | H | 1.205111                            | 2.67876  | 0.114596 |   |   |          |          |          |
| 1                         | H | 2.716643 | 1.987454 | 0.250711                            | 1 | H | -3.37713 | 1.093473                  | -0.00084 | 1 | H | -3.37713                            | 1.093473 | -0.00084 |   |   |          |          |          |
| 1                         | H | 1.162226 | 2.703177 | 0.043519                            | 1 | H | 2.841691 | -0.57048                  | 0.020559 | 1 | H | 2.841691                            | -0.57048 | 0.020559 |   |   |          |          |          |
| 1                         | H | 1.928838 | -2.57969 | 0.050451                            | 7 | N | 2.133114 | -2.87444                  | 0.011338 | 7 | N | 2.133114                            | -2.87444 | 0.011338 |   |   |          |          |          |
| 1                         | H | 2.849173 | -0.4517  | -0.01114                            | 8 | O | 3.345284 | -2.56463                  | 0.026709 | 8 | O | 3.345284                            | -2.56463 | 0.026709 |   |   |          |          |          |
| 7                         | N | -3.70469 | 1.215275 | 0.014327                            | 8 | O | 1.686322 | -4.01182                  | -2.7E-05 | 8 | O | 1.686322                            | -4.01182 | -2.7E-05 |   |   |          |          |          |
| 8                         | O | -4.6306  | 0.466033 | -0.29823                            |   |   |          |                           |          |   |   |                                     |          |          |   |   |          |          |          |
| 8                         | O | -3.80801 | 2.404486 | 0.325092                            |   |   |          |                           |          |   |   |                                     |          |          |   |   |          |          |          |
|                           |   |          |          |                                     |   |   |          |                           |          |   |   |                                     |          |          |   |   |          |          |          |
| C8-CN-AD_1H               |   |          |          | E <sub>tot</sub> = -559.262127 a.u. |   |   |          | C2-CN-AD_1H               |          |   |   | E <sub>tot</sub> = -559.256303 a.u. |          |          |   |   |          |          |          |
| Gibbs free energy         |   |          |          | E <sub>G</sub> = -559.1899 a.u.     |   |   |          | Gibbs free energy         |          |   |   | E <sub>G</sub> = -559.184415 a.u.   |          |          |   |   |          |          |          |
| 7                         | N | 1.829419 | -0.48385 | 0.011031                            | 7 | N | 1.849765 | -0.49622                  | 0.011055 | 6 | C | 1.235683                            | -1.75808 | 0.005503 | 6 | C | 1.235683 | -1.75808 | 0.005503 |
| 6                         | C | 1.22123  | -1.74045 | 0.003563                            | 7 | N | -0.06336 | -1.95463                  | -0.00473 | 7 | N | -0.06336                            | -1.95463 | -0.00473 |   |   |          |          |          |
| 7                         | N | -0.06624 | -1.94398 | -0.00705                            | 6 | C | -0.81373 | -0.81841                  | -0.0104  | 6 | C | -0.81373                            | -0.81841 | -0.0104  |   |   |          |          |          |
| 6                         | C | -0.82771 | -0.80274 | -0.01096                            | 6 | C | -0.25205 | 0.517852                  | -0.00153 | 6 | C | -0.25205                            | 0.517852 | -0.00153 |   |   |          |          |          |
| 6                         | C | -0.26925 | 0.530265 | -0.00238                            | 6 | C | 1.133536 | 0.6764                    | 0.010278 | 6 | C | 1.133536                            | 0.6764   | 0.010278 |   |   |          |          |          |
| 6                         | C | 1.11567  | 0.692885 | 0.01007                             | 7 | N | -1.25526 | 1.439388                  | 0.008855 | 7 | N | -1.25526                            | 1.439388 | 0.008855 |   |   |          |          |          |
| 7                         | N | -1.26982 | 1.458168 | 0.008929                            | 6 | C | -2.35904 | 0.636588                  | 0.002411 | 6 | C | -2.35904                            | 0.636588 | 0.002411 |   |   |          |          |          |
| 6                         | C | -2.37015 | 0.652475 | 0.004175                            | 7 | N | -2.16343 | -0.7166                   | -0.00702 | 7 | N | -2.16343                            | -0.7166  | -0.00702 |   |   |          |          |          |
| 7                         | N | -2.17242 | -0.71135 | -0.00558                            | 7 | N | 1.781229 | 1.875701                  | -0.037   | 7 | N | 1.781229                            | 1.875701 | -0.037   |   |   |          |          |          |
| 7                         | N | 1.760668 | 1.893482 | -0.03735                            | 1 | H | 2.724546 | 1.960257                  | 0.323168 | 1 | H | 2.724546                            | 1.960257 | 0.323168 |   |   |          |          |          |
| 1                         | H | 2.701108 | 1.981222 | 0.329511                            | 1 | H | 1.179766 | 2.682331                  | 0.098183 | 1 | H | 1.179766                            | 2.682331 | 0.098183 |   |   |          |          |          |
| 1                         | H | 1.158086 | 2.7005   | 0.092031                            | 1 | H | -3.36388 | 1.061586                  | 0.006653 | 1 | H | -3.36388                            | 1.061586 | 0.006653 |   |   |          |          |          |
| 1                         | H | 1.921902 | -2.57869 | 0.008805                            | 1 | H | 2.865026 | -0.46861                  | -0.01392 | 1 | H | 2.865026                            | -0.46861 | -0.01392 |   |   |          |          |          |
| 1                         | H | 2.843818 | -0.44913 | -0.01383                            | 6 | C | 2.154187 | -2.85981                  | 0.015832 | 6 | C | 2.154187                            | -2.85981 | 0.015832 |   |   |          |          |          |
| 6                         | C | -3.69164 | 1.208938 | 0.012448                            | 7 | N | 2.956517 | -3.71584                  | 0.024327 | 7 | N | 2.956517                            | -3.71584 | 0.024327 |   |   |          |          |          |
| 7                         | N | -4.76872 | 1.671109 | 0.020038                            |   |   |          |                           |          |   |   |                                     |          |          |   |   |          |          |          |

|                   |   |          |          |                                     |   |   |          |                   |          |   |   |                                     |          |          |   |   |          |          |          |
|-------------------|---|----------|----------|-------------------------------------|---|---|----------|-------------------|----------|---|---|-------------------------------------|----------|----------|---|---|----------|----------|----------|
| C8-CHO-AD_1H      |   |          |          | E <sub>tot</sub> = -580.344124 a.u. |   |   |          | C2-CHO-AD_1H      |          |   |   | E <sub>tot</sub> = -580.355145 a.u. |          |          |   |   |          |          |          |
| Gibbs free energy |   |          |          | E <sub>G</sub> = -580.262066 a.u.   |   |   |          | Gibbs free energy |          |   |   | E <sub>G</sub> = -580.272473 a.u.   |          |          |   |   |          |          |          |
| 7                 | N | 1.824815 | -0.39242 | 0.012742                            | 7 | N | 1.846864 | -0.48795          | 0.020428 | 7 | N | 1.846864                            | -0.48795 | 0.020428 | 7 | N | 1.846864 | -0.48795 | 0.020428 |
| 6                 | C | 1.198066 | -1.64202 | 0.005143                            | 6 | C | 1.246716 | -1.74433          | 0.007174 | 6 | C | 1.246716                            | -1.74433 | 0.007174 | 6 | C | 1.246716 | -1.74433 | 0.007174 |
| 7                 | N | -0.09178 | -1.828   | -0.00606                            | 7 | N | -0.05792 | -1.95168          | -0.00805 | 7 | N | -0.05792                            | -1.95168 | -0.00805 | 7 | N | -0.05792 | -1.95168 | -0.00805 |
| 6                 | C | -0.83975 | -0.67609 | -0.01016                            | 6 | C | -0.81064 | -0.82289          | -0.00948 | 6 | C | -0.81064                            | -0.82289 | -0.00948 | 6 | C | -0.81064 | -0.82289 | -0.00948 |
| 6                 | C | -0.26146 | 0.650834 | -0.00121                            | 6 | C | -0.25383 | 0.515971          | 0.00455  | 6 | C | -0.25383                            | 0.515971 | 0.00455  | 6 | C | -0.25383 | 0.515971 | 0.00455  |
| 6                 | C | 1.127695 | 0.793115 | 0.011211                            | 6 | C | 1.138827 | 0.679091          | 0.019773 | 6 | C | 1.138827                            | 0.679091 | 0.019773 | 6 | C | 1.138827 | 0.679091 | 0.019773 |
| 7                 | N | -1.2425  | 1.593035 | 0.010535                            | 7 | N | -1.25539 | 1.432922          | 0.0118   | 7 | N | -1.25539                            | 1.432922 | 0.0118   | 7 | N | -1.25539 | 1.432922 | 0.0118   |
| 6                 | C | -2.36301 | 0.815045 | 0.00478                             | 6 | C | -2.3637  | 0.625782          | -0.00021 | 6 | C | -2.3637                             | 0.625782 | -0.00021 | 6 | C | -2.3637  | 0.625782 | -0.00021 |
| 7                 | N | -2.17964 | -0.55633 | -0.00601                            | 7 | N | -2.16668 | -0.72087          | -0.01218 | 7 | N | -2.16668                            | -0.72087 | -0.01218 | 7 | N | -2.16668 | -0.72087 | -0.01218 |
| 7                 | N | 1.783482 | 1.986351 | -0.03396                            | 7 | N | 1.770431 | 1.88125           | -0.00925 | 7 | N | 1.770431                            | 1.88125  | -0.00925 | 7 | N | 1.770431 | 1.88125  | -0.00925 |
| 1                 | H | 2.729685 | 2.06718  | 0.318577                            | 1 | H | 2.745377 | 1.968311          | 0.246787 | 1 | H | 2.745377                            | 1.968311 | 0.246787 | 1 | H | 2.745377 | 1.968311 | 0.246787 |
| 1                 | H | 1.186897 | 2.798929 | 0.090445                            | 1 | H | 1.178082 | 2.694477          | 0.115466 | 1 | H | 1.178082                            | 2.694477 | 0.115466 | 1 | H | 1.178082 | 2.694477 | 0.115466 |
| 1                 | H | 1.888241 | -2.48906 | 0.01087                             | 1 | H | -3.36767 | 1.05299           | 0.000999 | 1 | H | -3.36767                            | 1.05299  | 0.000999 | 1 | H | -3.36767 | 1.05299  | 0.000999 |
| 1                 | H | 2.839621 | -0.37267 | -0.01034                            | 1 | H | 2.868505 | -0.51373          | 0.01939  | 1 | H | 2.868505                            | -0.51373 | 0.01939  | 1 | H | 2.868505 | -0.51373 | 0.01939  |
| 6                 | C | -3.74391 | 1.356184 | 0.013206                            | 6 | C | 2.196654 | -2.86874          | 0.012616 | 6 | C | 2.196654                            | -2.86874 | 0.012616 | 6 | C | 2.196654 | -2.86874 | 0.012616 |
| 8                 | O | -4.03306 | 2.543727 | 0.028817                            | 8 | O | 3.416484 | -2.69823          | 0.028107 | 8 | O | 3.416484                            | -2.69823 | 0.028107 | 8 | O | 3.416484 | -2.69823 | 0.028107 |
| 1                 | H | -4.52521 | 0.555447 | 0.004283                            | 1 | H | 1.721036 | -3.87412          | 0.001342 | 1 | H | 1.721036                            | -3.87412 | 0.001342 | 1 | H | 1.721036 | -3.87412 | 0.001342 |
| C8-CHO-AD_1H      |   |          |          | E <sub>tot</sub> = -580.343273 a.u. |   |   |          | C2-CHO-AD_1H      |          |   |   | E <sub>tot</sub> = -580.339473 a.u. |          |          |   |   |          |          |          |
| Gibbs free energy |   |          |          | E <sub>G</sub> = -580.261129 a.u.   |   |   |          | Gibbs free energy |          |   |   | E <sub>G</sub> = -580.257639 a.u.   |          |          |   |   |          |          |          |
| 7                 | N | 1.835315 | -0.47635 | 0.009655                            | 7 | N | 1.786291 | -0.60532          | 0.009309 | 7 | N | 1.786291                            | -0.60532 | 0.009309 | 7 | N | 1.786291 | -0.60532 | 0.009309 |
| 6                 | C | 1.240486 | -1.74087 | 0.003623                            | 6 | C | 1.173971 | -1.86923          | 0.00744  | 6 | C | 1.173971                            | -1.86923 | 0.00744  | 6 | C | 1.173971 | -1.86923 | 0.00744  |
| 7                 | N | -0.04334 | -1.96048 | -0.00553                            | 7 | N | -0.13168 | -2.04462          | -0.00064 | 7 | N | -0.13168                            | -2.04462 | -0.00064 | 7 | N | -0.13168 | -2.04462 | -0.00064 |
| 6                 | C | -0.82271 | -0.82845 | -0.00965                            | 6 | C | -0.869   | -0.90781          | -0.0081  | 6 | C | -0.869                              | -0.90781 | -0.0081  | 6 | C | -0.869   | -0.90781 | -0.0081  |
| 6                 | C | -0.27592 | 0.513957 | -0.00282                            | 6 | C | -0.29868 | 0.428191          | -0.00336 | 6 | C | -0.29868                            | 0.428191 | -0.00336 | 6 | C | -0.29868 | 0.428191 | -0.00336 |
| 6                 | C | 1.106961 | 0.691347 | 0.008456                            | 6 | C | 1.090425 | 0.572917          | 0.007434 | 6 | C | 1.090425                            | 0.572917 | 0.007434 | 6 | C | 1.090425 | 0.572917 | 0.007434 |
| 7                 | N | -1.28957 | 1.4235   | 0.009079                            | 7 | N | -1.2907  | 1.35622           | 0.006638 | 7 | N | -1.2907                             | 1.35622  | 0.006638 | 7 | N | -1.2907  | 1.35622  | 0.006638 |
| 6                 | C | -2.38884 | 0.607748 | 0.005607                            | 6 | C | -2.40527 | 0.559427          | 0.003585 | 6 | C | -2.40527                            | 0.559427 | 0.003585 | 6 | C | -2.40527 | 0.559427 | 0.003585 |
| 7                 | N | -2.16397 | -0.7525  | -0.00364                            | 7 | N | -2.22238 | -0.79066          | -0.00291 | 7 | N | -2.22238                            | -0.79066 | -0.00291 | 7 | N | -2.22238 | -0.79066 | -0.00291 |
| 7                 | N | 1.741318 | 1.89888  | -0.04027                            | 7 | N | 1.74711  | 1.769864          | -0.04379 | 7 | N | 1.74711                             | 1.769864 | -0.04379 | 7 | N | 1.74711  | 1.769864 | -0.04379 |
| 1                 | H | 2.678072 | 1.995117 | 0.334269                            | 1 | H | 2.683871 | 1.847603          | 0.33529  | 1 | H | 2.683871                            | 1.847603 | 0.33529  | 1 | H | 2.683871 | 1.847603 | 0.33529  |
| 1                 | H | 1.129326 | 2.69823  | 0.092136                            | 1 | H | 1.148865 | 2.578428          | 0.095434 | 1 | H | 1.148865                            | 2.578428 | 0.095434 | 1 | H | 1.148865 | 2.578428 | 0.095434 |
| 1                 | H | 1.952152 | -2.57013 | 0.008581                            | 1 | H | -3.40546 | 0.99566           | 0.008416 | 1 | H | -3.40546                            | 0.99566  | 0.008416 | 1 | H | -3.40546 | 0.99566  | 0.008416 |
| 1                 | H | 2.849093 | -0.42994 | -0.01768                            | 1 | H | 2.803263 | -0.58343          | -0.01487 | 1 | H | 2.803263                            | -0.58343 | -0.01487 | 1 | H | 2.803263 | -0.58343 | -0.01487 |
| 6                 | C | -3.73298 | 1.233221 | 0.013937                            | 6 | C | 2.135773 | -3.00104          | 0.017516 | 6 | C | 2.135773                            | -3.00104 | 0.017516 | 6 | C | 2.135773 | -3.00104 | 0.017516 |
| 8                 | O | -4.79521 | 0.630856 | 0.014141                            | 8 | O | 1.838329 | -4.1804           | 0.014989 | 8 | O | 1.838329                            | -4.1804  | 0.014989 | 8 | O | 1.838329 | -4.1804  | 0.014989 |
| 1                 | H | -3.68517 | 2.352495 | 0.020193                            | 1 | H | 3.216316 | -2.67472          | 0.02734  | 1 | H | 3.216316                            | -2.67472 | 0.02734  | 1 | H | 3.216316 | -2.67472 | 0.02734  |

|                                                     |    |          |          |                                                     |    |    |          |          |          |
|-----------------------------------------------------|----|----------|----------|-----------------------------------------------------|----|----|----------|----------|----------|
| C8-Cl-AD_1H $E_{\text{tot}} = -926.705777$ a.u.     |    |          |          | C2-Cl-AD_1H $E_{\text{tot}} = -926.702403$ a.u.     |    |    |          |          |          |
| Gibbs free energy $E_{\text{G}} = -926.640506$ a.u. |    |          |          | Gibbs free energy $E_{\text{G}} = -926.637384$ a.u. |    |    |          |          |          |
| 7                                                   | N  | 1.837789 | -0.4892  | 0.000646                                            | 7  | N  | 1.839498 | -0.50067 | 0.003836 |
| 6                                                   | C  | 1.232278 | -1.74099 | 0.00534                                             | 6  | C  | 1.214501 | -1.73975 | 0.00555  |
| 7                                                   | N  | -0.05883 | -1.9433  | 0.001961                                            | 7  | N  | -0.06    | -1.9451  | 0.001651 |
| 6                                                   | C  | -0.81674 | -0.80341 | -0.00794                                            | 6  | C  | -0.8258  | -0.80317 | -0.00911 |
| 6                                                   | C  | -0.25652 | 0.531318 | -0.00855                                            | 6  | C  | -0.26069 | 0.529465 | -0.00784 |
| 6                                                   | C  | 1.122496 | 0.690442 | -0.00155                                            | 6  | C  | 1.117217 | 0.680296 | 0.000973 |
| 7                                                   | N  | -1.26753 | 1.459108 | 0.003135                                            | 7  | N  | -1.2735  | 1.45576  | 0.004548 |
| 6                                                   | C  | -2.3463  | 0.647837 | 0.006855                                            | 6  | C  | -2.36612 | 0.656237 | 0.006024 |
| 7                                                   | N  | -2.16447 | -0.70921 | 0.0036                                              | 7  | N  | -2.16716 | -0.70805 | 0.001465 |
| 7                                                   | N  | 1.787438 | 1.891284 | -0.06952                                            | 7  | N  | 1.790564 | 1.872721 | -0.06103 |
| 1                                                   | H  | 2.67337  | 1.975032 | 0.41947                                             | 1  | H  | 2.693949 | 1.945781 | 0.395416 |
| 1                                                   | H  | 1.171782 | 2.690103 | 0.058749                                            | 1  | H  | 1.185714 | 2.678605 | 0.071615 |
| 1                                                   | H  | 1.929619 | -2.58196 | 0.013618                                            | 1  | H  | -3.37473 | 1.072794 | 0.013251 |
| 1                                                   | H  | 2.851252 | -0.4507  | -0.0433                                             | 1  | H  | 2.852985 | -0.47948 | -0.04213 |
| 17                                                  | Cl | -3.94584 | 1.308399 | 0.019091                                            | 17 | Cl | 2.34794  | -3.07591 | 0.019723 |
| C8-F-AD_1H $E_{\text{tot}} = -566.280394$ a.u.      |    |          |          | C2-F-AD_1H $E_{\text{tot}} = -566.275710$ a.u.      |    |    |          |          |          |
| Gibbs free energy $E_{\text{G}} = -566.212364$ a.u. |    |          |          | Gibbs free energy $E_{\text{G}} = -566.208069$ a.u. |    |    |          |          |          |
| 7                                                   | N  | 1.836326 | -0.48973 | -0.002                                              | 7  | N  | 1.843815 | -0.50091 | 0.004092 |
| 6                                                   | C  | 1.232704 | -1.73978 | 0.005166                                            | 6  | C  | 1.207702 | -1.72522 | 0.005575 |
| 7                                                   | N  | -0.05975 | -1.94192 | 0.004103                                            | 7  | N  | -0.05601 | -1.9514  | 0.002792 |
| 6                                                   | C  | -0.81691 | -0.80403 | -0.00625                                            | 6  | C  | -0.82559 | -0.80647 | -0.00858 |
| 6                                                   | C  | -0.25667 | 0.533276 | -0.0084                                             | 6  | C  | -0.25775 | 0.52692  | -0.00788 |
| 6                                                   | C  | 1.120624 | 0.690954 | -0.00312                                            | 6  | C  | 1.117268 | 0.682431 | 0.000439 |
| 7                                                   | N  | -1.27105 | 1.460369 | 0.003607                                            | 7  | N  | -1.27365 | 1.45435  | 0.004599 |
| 6                                                   | C  | -2.33347 | 0.640819 | 0.008733                                            | 6  | C  | -2.36311 | 0.65644  | 0.007624 |
| 7                                                   | N  | -2.16573 | -0.70979 | 0.00666                                             | 7  | N  | -2.16333 | -0.71148 | 0.003321 |
| 7                                                   | N  | 1.791527 | 1.891161 | -0.07474                                            | 7  | N  | 1.793902 | 1.874269 | -0.06641 |
| 1                                                   | H  | 2.664229 | 1.974009 | 0.438479                                            | 1  | H  | 2.681683 | 1.951429 | 0.420228 |
| 1                                                   | H  | 1.174778 | 2.689995 | 0.049438                                            | 1  | H  | 1.184008 | 2.678536 | 0.055461 |
| 1                                                   | H  | 1.928802 | -2.58173 | 0.013133                                            | 1  | H  | -3.37261 | 1.070858 | 0.015243 |
| 1                                                   | H  | 2.849503 | -0.44964 | -0.05048                                            | 1  | H  | 2.857219 | -0.48724 | -0.05111 |
| 9                                                   | F  | -3.56853 | 1.148494 | 0.018907                                            | 9  | F  | 2.09651  | -2.74372 | 0.015823 |
| C8-H-AD_1H $E_{\text{tot}} = -467.069792$ a.u.      |    |          |          | C2-H-AD_1H $E_{\text{tot}} = -467.069792$ a.u.      |    |    |          |          |          |
| Gibbs free energy $E_{\text{G}} = -466.99272$ a.u.  |    |          |          | Gibbs free energy $E_{\text{G}} = -466.99272$ a.u.  |    |    |          |          |          |
| 7                                                   | N  | 1.843838 | -0.48974 | -0.00037                                            | 7  | N  | 1.843838 | -0.48974 | -0.00037 |
| 6                                                   | C  | 1.238324 | -1.74401 | 0.005322                                            | 6  | C  | 1.238324 | -1.74401 | 0.005322 |
| 7                                                   | N  | -0.0518  | -1.94645 | 0.002588                                            | 7  | N  | -0.0518  | -1.94645 | 0.002588 |
| 6                                                   | C  | -0.8139  | -0.80699 | -0.00787                                            | 6  | C  | -0.8139  | -0.80699 | -0.00787 |
| 6                                                   | C  | -0.25316 | 0.529442 | -0.00976                                            | 6  | C  | -0.25316 | 0.529442 | -0.00976 |
| 6                                                   | C  | 1.1257   | 0.687191 | -0.00332                                            | 6  | C  | 1.1257   | 0.687191 | -0.00332 |
| 7                                                   | N  | -1.26468 | 1.454384 | 0.003038                                            | 7  | N  | -1.26468 | 1.454384 | 0.003038 |
| 6                                                   | C  | -2.35845 | 0.651982 | 0.008009                                            | 6  | C  | -2.35845 | 0.651982 | 0.008009 |
| 7                                                   | N  | -2.15946 | -0.7083  | 0.0051                                              | 7  | N  | -2.15946 | -0.7083  | 0.0051   |
| 7                                                   | N  | 1.789146 | 1.88985  | -0.07085                                            | 7  | N  | 1.789146 | 1.88985  | -0.07085 |
| 1                                                   | H  | 2.673125 | 1.975185 | 0.421389                                            | 1  | H  | 2.673125 | 1.975185 | 0.421389 |
| 1                                                   | H  | 1.168191 | 2.684323 | 0.060485                                            | 1  | H  | 1.168191 | 2.684323 | 0.060485 |
| 1                                                   | H  | 1.937806 | -2.58348 | 0.014141                                            | 1  | H  | 1.937806 | -2.58348 | 0.014141 |
| 1                                                   | H  | -3.36668 | 1.070055 | 0.017315                                            | 1  | H  | -3.36668 | 1.070055 | 0.017315 |
| 1                                                   | H  | 2.857129 | -0.45    | -0.04418                                            | 1  | H  | 2.857129 | -0.45    | -0.04418 |

|                   |   |          |          |                                     |   |   |          |                   |          |  |  |                                     |  |  |  |
|-------------------|---|----------|----------|-------------------------------------|---|---|----------|-------------------|----------|--|--|-------------------------------------|--|--|--|
| C8-Me-AD_1H       |   |          |          | E <sub>tot</sub> = -506.371454 a.u. |   |   |          | C2-Me-AD_1H       |          |  |  | E <sub>tot</sub> = -506.370739 a.u. |  |  |  |
| Gibbs free energy |   |          |          | E <sub>G</sub> = -506.270763 a.u.   |   |   |          | Gibbs free energy |          |  |  | E <sub>G</sub> = -506.269624 a.u.   |  |  |  |
| 7                 | N | 1.843535 | -0.48706 | -0.01734                            | 7 | N | 1.824737 | -0.51139          | -0.00187 |  |  |                                     |  |  |  |
| 6                 | C | 1.237493 | -1.73316 | -0.13095                            | 6 | C | 1.223773 | -1.77437          | 0.005661 |  |  |                                     |  |  |  |
| 7                 | N | -0.05357 | -1.93059 | -0.18135                            | 7 | N | -0.07544 | -1.94579          | 0.004994 |  |  |                                     |  |  |  |
| 6                 | C | -0.81431 | -0.79191 | -0.11493                            | 6 | C | -0.82817 | -0.80073          | -0.00605 |  |  |                                     |  |  |  |
| 6                 | C | -0.25087 | 0.539179 | 0.009985                            | 6 | C | -0.26165 | 0.530891          | -0.01079 |  |  |                                     |  |  |  |
| 6                 | C | 1.125494 | 0.689609 | 0.062473                            | 6 | C | 1.116069 | 0.67202           | -0.0061  |  |  |                                     |  |  |  |
| 7                 | N | -1.26358 | 1.459842 | 0.075298                            | 7 | N | -1.26968 | 1.463531          | 0.002705 |  |  |                                     |  |  |  |
| 6                 | C | -2.36879 | 0.671633 | -0.01406                            | 6 | C | -2.36589 | 0.667497          | 0.010598 |  |  |                                     |  |  |  |
| 7                 | N | -2.15562 | -0.69071 | -0.12643                            | 7 | N | -2.17315 | -0.69559          | 0.009362 |  |  |                                     |  |  |  |
| 7                 | N | 1.801366 | 1.891636 | 0.108384                            | 7 | N | 1.796838 | 1.866368          | -0.07663 |  |  |                                     |  |  |  |
| 1                 | H | 2.644818 | 1.92835  | 0.674259                            | 1 | H | 2.675315 | 1.940506          | 0.427642 |  |  |                                     |  |  |  |
| 1                 | H | 1.173207 | 2.672783 | 0.282048                            | 1 | H | 1.18493  | 2.668176          | 0.05293  |  |  |                                     |  |  |  |
| 1                 | H | 1.934043 | -2.57391 | -0.1763                             | 1 | H | -3.3725  | 1.089643          | 0.0204   |  |  |                                     |  |  |  |
| 1                 | H | 2.857259 | -0.44432 | -0.04181                            | 1 | H | 2.837556 | -0.47029          | -0.05306 |  |  |                                     |  |  |  |
| 6                 | C | -3.7523  | 1.235966 | 0.00874                             | 6 | C | 2.167402 | -2.94443          | 0.017053 |  |  |                                     |  |  |  |
| 1                 | H | -3.71507 | 2.328406 | 0.114507                            | 1 | H | 2.823631 | -2.94107          | -0.87095 |  |  |                                     |  |  |  |
| 1                 | H | -4.2866  | 0.973632 | -0.91974                            | 1 | H | 2.810303 | -2.9338           | 0.914613 |  |  |                                     |  |  |  |
| 1                 | H | -4.32803 | 0.802781 | 0.843526                            | 1 | H | 1.574576 | -3.86642          | 0.015819 |  |  |                                     |  |  |  |
| C8-OMe-AD_1H      |   |          |          | E <sub>tot</sub> = -581.554600 a.u. |   |   |          | C2-OMe-AD_1H      |          |  |  | E <sub>tot</sub> = -581.555696 a.u. |  |  |  |
| Gibbs free energy |   |          |          | E <sub>G</sub> = -581.44955 a.u.    |   |   |          | Gibbs free energy |          |  |  | E <sub>G</sub> = -581.450664 a.u.   |  |  |  |
| 7                 | N | 1.805936 | -0.49501 | -0.00723                            | 7 | N | 1.827005 | -0.54669          | 0.006125 |  |  |                                     |  |  |  |
| 6                 | C | 1.200013 | -1.7403  | 0.00435                             | 6 | C | 1.194045 | -1.78279          | 0.014064 |  |  |                                     |  |  |  |
| 7                 | N | -0.09658 | -1.93558 | 0.004287                            | 7 | N | -0.0935  | -1.97076          | 0.011439 |  |  |                                     |  |  |  |
| 6                 | C | -0.8491  | -0.79565 | -0.01086                            | 6 | C | -0.84244 | -0.81663          | -0.00369 |  |  |                                     |  |  |  |
| 6                 | C | -0.28477 | 0.542683 | -0.01496                            | 6 | C | -0.26029 | 0.508381          | -0.01021 |  |  |                                     |  |  |  |
| 6                 | C | 1.093523 | 0.688977 | -0.00816                            | 6 | C | 1.115771 | 0.640904          | -0.00377 |  |  |                                     |  |  |  |
| 7                 | N | -1.28876 | 1.472047 | -0.00634                            | 7 | N | -1.26624 | 1.45175           | 0.000163 |  |  |                                     |  |  |  |
| 6                 | C | -2.3805  | 0.66851  | -0.00033                            | 6 | C | -2.36402 | 0.667733          | 0.007319 |  |  |                                     |  |  |  |
| 7                 | N | -2.19397 | -0.69607 | 0.00185                             | 7 | N | -2.18145 | -0.7034           | 0.008653 |  |  |                                     |  |  |  |
| 7                 | N | 1.780262 | 1.888841 | -0.08445                            | 7 | N | 1.809574 | 1.826449          | -0.07662 |  |  |                                     |  |  |  |
| 1                 | H | 2.600206 | 1.977537 | 0.511351                            | 1 | H | 2.688583 | 1.8912            | 0.428086 |  |  |                                     |  |  |  |
| 1                 | H | 1.14969  | 2.681686 | 0.015694                            | 1 | H | 1.206457 | 2.635328          | 0.049037 |  |  |                                     |  |  |  |
| 1                 | H | 1.890976 | -2.58629 | 0.015144                            | 1 | H | -3.36865 | 1.094528          | 0.014367 |  |  |                                     |  |  |  |
| 1                 | H | 2.818569 | -0.45538 | -0.06411                            | 1 | H | 2.84021  | -0.5412           | -0.05129 |  |  |                                     |  |  |  |
| 8                 | O | -3.59844 | 1.227965 | 0.00746                             | 8 | O | 2.099784 | -2.78712          | 0.025872 |  |  |                                     |  |  |  |
| 6                 | C | -4.71593 | 0.310136 | 0.00971                             | 6 | C | 1.535234 | -4.12448          | 0.023657 |  |  |                                     |  |  |  |
| 1                 | H | -5.60779 | 0.949931 | 0.017016                            | 1 | H | 0.923589 | -4.27431          | -0.87761 |  |  |                                     |  |  |  |
| 1                 | H | -4.69561 | -0.32326 | -0.89025                            | 1 | H | 2.404964 | -4.792            | 0.030459 |  |  |                                     |  |  |  |
| 1                 | H | -4.68581 | -0.3309  | 0.903948                            | 1 | H | 0.911183 | -4.272            | 0.916699 |  |  |                                     |  |  |  |



C8-OMe-AD\_1H  $E_{\text{tot}} = -581.554279$  a.u.  
 Gibbs free energy  $E_{\text{G}} = -581.449095$  a.u.

|   |   |          |          |          |
|---|---|----------|----------|----------|
| 7 | N | 1.856561 | -0.52292 | -0.013   |
| 6 | C | 1.224597 | -1.75528 | 0.000212 |
| 7 | N | -0.07334 | -1.92728 | 0.008899 |
| 6 | C | -0.80785 | -0.77195 | 0.000444 |
| 6 | C | -0.2127  | 0.554824 | -0.00486 |
| 6 | C | 1.164726 | 0.67564  | -0.00758 |
| 7 | N | -1.20621 | 1.501581 | 0.010464 |
| 6 | C | -2.31043 | 0.713514 | 0.020164 |
| 7 | N | -2.14689 | -0.65241 | 0.019746 |
| 7 | N | 1.881458 | 1.860193 | -0.08775 |
| 1 | H | 2.697438 | 1.928038 | 0.516883 |
| 1 | H | 1.269641 | 2.666714 | 0.016954 |
| 1 | H | 1.899327 | -2.61486 | 0.004259 |
| 1 | H | 2.868715 | -0.50243 | -0.08403 |
| 8 | O | -3.56009 | 1.196844 | 0.032855 |
| 6 | C | -3.67351 | 2.635815 | 0.032144 |
| 1 | H | -4.75207 | 2.837895 | 0.039169 |
| 1 | H | -3.19019 | 3.059828 | 0.926354 |
| 1 | H | -3.20184 | 3.057961 | -0.86902 |

C2-OMe-AD\_1H  $E_{\text{tot}} = -581.542138$  a.u.  
 Gibbs free energy  $E_{\text{G}} = -581.437865$  a.u.

|   |   |          |          |          |
|---|---|----------|----------|----------|
| 7 | N | 1.848803 | -0.41708 | -0.00839 |
| 6 | C | 1.266695 | -1.68131 | -0.00435 |
| 7 | N | -0.01535 | -1.90644 | 0.000716 |
| 6 | C | -0.80504 | -0.78786 | -0.00762 |
| 6 | C | -0.27749 | 0.564845 | -0.00651 |
| 6 | C | 1.08821  | 0.745701 | -0.00598 |
| 7 | N | -1.31978 | 1.465913 | 0.013787 |
| 6 | C | -2.38437 | 0.635366 | 0.018763 |
| 7 | N | -2.14851 | -0.72594 | 0.010994 |
| 7 | N | 1.753768 | 1.954318 | -0.08345 |
| 1 | H | 2.575874 | 2.059894 | 0.506518 |
| 1 | H | 1.109904 | 2.737114 | 0.009669 |
| 1 | H | -3.40536 | 1.02172  | 0.031537 |
| 8 | H | 2.852576 | -0.32365 | -0.1112  |
| 6 | O | 2.089585 | -2.76382 | 0.000253 |
| 6 | C | 3.510152 | -2.57507 | 0.017092 |
| 1 | H | 3.859701 | -2.05711 | -0.89569 |
| 1 | H | 3.833337 | -2.02977 | 0.922623 |
| 1 | H | 3.936343 | -3.58511 | 0.035804 |

C8-OH-AD\_1H  $E_{\text{tot}} = -542.280433$  a.u.  
 Gibbs free energy  $E_{\text{G}} = -542.199927$  a.u.

|   |   |          |          |          |
|---|---|----------|----------|----------|
| 7 | N | 1.816125 | -0.49437 | -0.00733 |
| 6 | C | 1.205483 | -1.73724 | 0.005059 |
| 7 | N | -0.09085 | -1.92938 | 0.007204 |
| 6 | C | -0.84026 | -0.78664 | -0.006   |
| 6 | C | -0.27037 | 0.549593 | -0.01115 |
| 6 | C | 1.106954 | 0.692628 | -0.00782 |
| 7 | N | -1.27387 | 1.485218 | -0.00044 |
| 6 | C | -2.36075 | 0.687344 | 0.007085 |
| 7 | N | -2.18427 | -0.67845 | 0.008173 |
| 7 | N | 1.79695  | 1.889311 | -0.08721 |
| 1 | H | 2.623856 | 1.974622 | 0.499115 |
| 1 | H | 1.171787 | 2.685993 | 0.014996 |
| 1 | H | 1.893698 | -2.58564 | 0.014322 |
| 1 | H | 2.82875  | -0.45839 | -0.06641 |
| 8 | O | -3.59948 | 1.215709 | 0.016929 |
| 1 | H | -4.2109  | 0.459445 | 0.020811 |

C2-OH-AD\_1H  $E_{\text{tot}} = -542.279325$  a.u.  
 Gibbs free energy  $E_{\text{G}} = -542.199126$  a.u.

|   |   |          |          |          |
|---|---|----------|----------|----------|
| 7 | N | 1.852626 | -0.516   | 0.004206 |
| 6 | C | 1.234392 | -1.75244 | 0.009176 |
| 7 | N | -0.04849 | -1.96464 | 0.006771 |
| 6 | C | -0.81667 | -0.82282 | -0.00635 |
| 6 | C | -0.24992 | 0.510874 | -0.0092  |
| 6 | C | 1.123218 | 0.663892 | -0.00231 |
| 7 | N | -1.26818 | 1.440162 | 0.002996 |
| 6 | C | -2.35567 | 0.642239 | 0.00777  |
| 7 | N | -2.15581 | -0.72682 | 0.006375 |
| 7 | N | 1.802484 | 1.857459 | -0.07343 |
| 1 | H | 2.677461 | 1.934771 | 0.436679 |
| 1 | H | 1.188289 | 2.658763 | 0.047988 |
| 1 | H | -3.36572 | 1.055864 | 0.015606 |
| 1 | H | 2.865393 | -0.4947  | -0.05611 |
| 8 | O | 2.13575  | -2.76893 | 0.018711 |
| 1 | H | 1.607303 | -3.58637 | 0.015014 |

C8-OH-AD\_1H  $E_{tot} = -542.279278$  a.u.  
Gibbs free energy  $E_G = -542.198816$  a.u.

|   |   |          |          |          |
|---|---|----------|----------|----------|
| 7 | N | 1.829347 | -0.4886  | -0.01015 |
| 6 | C | 1.223827 | -1.73397 | 0.004035 |
| 7 | N | -0.071   | -1.9315  | 0.009978 |
| 6 | C | -0.82725 | -0.79302 | -0.00182 |
| 6 | C | -0.26123 | 0.54651  | -0.00896 |
| 6 | C | 1.114659 | 0.695331 | -0.00852 |
| 7 | N | -1.27751 | 1.468365 | 0.003324 |
| 6 | C | -2.3616  | 0.653896 | 0.013518 |
| 7 | N | -2.17225 | -0.70186 | 0.015884 |
| 7 | N | 1.805345 | 1.893637 | -0.08878 |
| 1 | H | 2.629087 | 1.977325 | 0.502687 |
| 1 | H | 1.181121 | 2.690102 | 0.017306 |
| 1 | H | 1.915824 | -2.57942 | 0.011197 |
| 1 | H | 2.841529 | -0.44787 | -0.07351 |
| 8 | O | -3.61487 | 1.146275 | 0.02405  |
| 1 | H | -3.52419 | 2.114505 | 0.019462 |

C2-OH-AD\_1H  $E_{tot} = -542.264826$  a.u.  
Gibbs free energy  $E_G = -542.186423$  a.u.

|   |   |          |          |          |
|---|---|----------|----------|----------|
| 7 | N | 1.860778 | -0.48852 | -0.04538 |
| 6 | C | 1.248802 | -1.74352 | -0.05383 |
| 7 | N | -0.03095 | -1.94791 | -0.0424  |
| 6 | C | -0.8003  | -0.80913 | -0.03557 |
| 6 | C | -0.24588 | 0.530132 | 0.007002 |
| 6 | C | 1.124393 | 0.689312 | -0.0067  |
| 7 | N | -1.26999 | 1.450289 | 0.056571 |
| 6 | C | -2.3513  | 0.642924 | 0.034208 |
| 7 | N | -2.14062 | -0.72276 | -0.01502 |
| 7 | N | 1.804215 | 1.886081 | -0.06911 |
| 1 | H | 2.661728 | 1.961674 | 0.471265 |
| 1 | H | 1.183499 | 2.682383 | 0.055877 |
| 1 | H | -3.36449 | 1.048281 | 0.057408 |
| 1 | H | 2.847942 | -0.42781 | -0.27423 |
| 8 | O | 2.098016 | -2.81278 | -0.12277 |
| 1 | H | 2.899823 | -2.64419 | 0.396937 |

C8-NH<sub>2</sub>-AD\_1H  $E_{tot} = -522.421093$  a.u.  
Gibbs free energy  $E_G = -522.329075$  a.u.

|   |   |          |          |          |
|---|---|----------|----------|----------|
| 7 | N | 1.821857 | -0.49234 | -0.02741 |
| 6 | C | 1.21548  | -1.73462 | -0.00935 |
| 7 | N | -0.08137 | -1.9297  | 0.017763 |
| 6 | C | -0.83563 | -0.78924 | 0.024631 |
| 6 | C | -0.26752 | 0.551266 | 0.014924 |
| 6 | C | 1.10838  | 0.694076 | -0.00595 |
| 7 | N | -1.2755  | 1.478128 | 0.042265 |
| 6 | C | -2.37496 | 0.67575  | 0.068735 |
| 7 | N | -2.17676 | -0.69266 | 0.062461 |
| 7 | N | 1.807606 | 1.892835 | -0.09238 |
| 1 | H | 2.598649 | 1.982696 | 0.543099 |
| 1 | H | 1.173336 | 2.683854 | 0.002073 |
| 1 | H | 1.90458  | -2.58243 | -0.01845 |
| 1 | H | 2.83225  | -0.45043 | -0.11261 |
| 7 | N | -3.64262 | 1.187497 | 0.150532 |
| 1 | H | -3.75299 | 2.157641 | -0.11676 |
| 1 | H | -4.39191 | 0.556552 | -0.10547 |

C2-NH<sub>2</sub>-AD\_1H  $E_{tot} = -522.414063$  a.u.  
Gibbs free energy  $E_G = -522.322177$  a.u.

|   |   |          |          |          |
|---|---|----------|----------|----------|
| 7 | N | 1.867562 | -0.50066 | -0.05628 |
| 6 | C | 1.268699 | -1.7602  | -0.05508 |
| 7 | N | -0.0244  | -1.96193 | -0.03304 |
| 6 | C | -0.79338 | -0.82558 | -0.02672 |
| 6 | C | -0.23962 | 0.513722 | 0.007689 |
| 6 | C | 1.130796 | 0.672629 | -0.01391 |
| 7 | N | -1.26452 | 1.434731 | 0.062252 |
| 6 | C | -2.34543 | 0.627138 | 0.050375 |
| 7 | N | -2.1353  | -0.73858 | 0.003588 |
| 7 | N | 1.807358 | 1.872476 | -0.07883 |
| 1 | H | 2.66835  | 1.946645 | 0.456202 |
| 1 | H | 1.185269 | 2.665748 | 0.057663 |
| 1 | H | -3.35857 | 1.032572 | 0.080142 |
| 1 | H | 2.857444 | -0.44475 | -0.2724  |
| 7 | N | 2.164839 | -2.82777 | -0.15604 |
| 1 | H | 2.936185 | -2.80332 | 0.508435 |
| 1 | H | 1.660408 | -3.70925 | -0.09495 |

**Table S14.** Values of total energies and Gibbs free energies, cartesian coordinates of equilibrium geometries of NX substituted adenine (AD) 9H, 7H, 3H and 1H tautomers.

| N9-NO <sub>2</sub> -AD_9H                           |   |           |           | N7-NO <sub>2</sub> -AD_7H                          |   |   |          |          |          |
|-----------------------------------------------------|---|-----------|-----------|----------------------------------------------------|---|---|----------|----------|----------|
| E <sub>tot</sub> = -671.492041 a.u.                 |   |           |           | E <sub>tot</sub> = -671.4901144 a.u.               |   |   |          |          |          |
| Gibbs free energy E <sub>G</sub> = -671.419679 a.u. |   |           |           | Gibbs free energy E <sub>G</sub> = -671.41608 a.u. |   |   |          |          |          |
| 7                                                   | N | 3.075438  | -0.009967 | 0.000172                                           | 7 | N | -3.06426 | -0.0483  | 0.048716 |
| 6                                                   | C | 2.785791  | -1.324234 | 0.000101                                           | 6 | C | -2.74386 | -1.35259 | 0.087473 |
| 7                                                   | N | 1.576966  | -1.929022 | 0.000073                                           | 7 | N | -1.52304 | -1.91601 | 0.051302 |
| 6                                                   | C | 0.587013  | -1.031651 | 0.000010                                           | 6 | C | -0.53534 | -1.01093 | 0.008296 |
| 6                                                   | C | 0.720821  | 0.369295  | -0.000006                                          | 6 | C | -0.73839 | 0.392584 | 0.013428 |
| 6                                                   | C | 2.045854  | 0.870583  | 0.000057                                           | 6 | C | -2.07208 | 0.873166 | -0.02083 |
| 7                                                   | N | -0.516285 | 1.020554  | -0.000059                                          | 7 | N | 0.569442 | 0.91627  | -0.09651 |
| 6                                                   | C | -1.411119 | 0.061619  | 0.000068                                           | 6 | C | 1.455828 | -0.18047 | -0.1253  |
| 7                                                   | N | -0.814654 | -1.212695 | 0.000005                                           | 7 | N | 0.833249 | -1.32502 | -0.07293 |
| 7                                                   | N | 2.320976  | 2.198131  | -0.000386                                          | 7 | N | -2.44421 | 2.17163  | -0.17177 |
| 1                                                   | H | 3.285411  | 2.500587  | 0.001177                                           | 1 | H | -3.43052 | 2.366275 | -0.05002 |
| 1                                                   | H | 1.571673  | 2.875653  | 0.001082                                           | 1 | H | -1.76584 | 2.900924 | 0.009197 |
| 1                                                   | H | 3.648551  | -1.997558 | 0.000365                                           | 1 | H | -3.592   | -2.0425  | 0.146075 |
| 1                                                   | H | -2.491476 | 0.165958  | 0.000098                                           | 1 | H | 2.528461 | -0.01473 | -0.17337 |
| 7                                                   | N | -1.562733 | -2.447789 | 0.000013                                           | 7 | N | 1.031958 | 2.246792 | 0.109752 |
| 8                                                   | O | -2.779166 | -2.307408 | 0.000331                                           | 8 | O | 0.193977 | 3.075621 | 0.457497 |
| 8                                                   | O | -0.910202 | -3.470692 | 0.000254                                           | 8 | O | 2.22501  | 2.432731 | -0.07979 |

  

| N9-CN-AD_9H                                         |   |           |           | N7-CN-AD_7H                                         |   |   |          |          |          |
|-----------------------------------------------------|---|-----------|-----------|-----------------------------------------------------|---|---|----------|----------|----------|
| E <sub>tot</sub> = -559.263292 a.u.                 |   |           |           | E <sub>tot</sub> = -559.256945 a.u.                 |   |   |          |          |          |
| Gibbs free energy E <sub>G</sub> = -559.192009 a.u. |   |           |           | Gibbs free energy E <sub>G</sub> = -559.186408 a.u. |   |   |          |          |          |
| 7                                                   | N | 2.701585  | -0.026905 | 0.000157                                            | 7 | N | -2.69055 | -0.03091 | 0.035411 |
| 6                                                   | C | 2.400440  | -1.339361 | 0.000688                                            | 6 | C | -2.37146 | -1.34331 | 0.023268 |
| 7                                                   | N | 1.182962  | -1.926024 | 0.000356                                            | 7 | N | -1.15698 | -1.91725 | -0.00054 |
| 6                                                   | C | 0.212950  | -1.010358 | 0.000267                                            | 6 | C | -0.15779 | -1.01634 | -0.01179 |
| 6                                                   | C | 0.352256  | 0.386750  | 0.000077                                            | 6 | C | -0.37287 | 0.376347 | -0.001   |
| 6                                                   | C | 1.685776  | 0.869443  | -0.000176                                           | 6 | C | -1.69058 | 0.877746 | 0.021718 |
| 7                                                   | N | -0.886302 | 1.031726  | 0.000551                                            | 7 | N | 0.917929 | 0.950648 | -0.01759 |
| 6                                                   | C | -1.776775 | 0.071917  | 0.000063                                            | 6 | C | 1.821281 | -0.14327 | -0.03742 |
| 7                                                   | N | -1.185026 | -1.218516 | 0.000036                                            | 7 | N | 1.216158 | -1.29945 | -0.035   |
| 7                                                   | N | 1.982513  | 2.192212  | -0.000805                                           | 7 | N | -2.01811 | 2.199233 | 0.017204 |
| 1                                                   | H | 2.951901  | 2.478624  | 0.001488                                            | 1 | H | -2.99787 | 2.441892 | 0.080521 |
| 1                                                   | H | 1.245428  | 2.882884  | 0.001609                                            | 1 | H | -1.32089 | 2.928828 | 0.067306 |
| 1                                                   | H | 3.256400  | -2.020992 | -0.000068                                           | 1 | H | -3.22616 | -2.02723 | 0.034941 |
| 1                                                   | H | -2.859268 | 0.176949  | -0.000017                                           | 1 | H | 2.893943 | 0.039487 | -0.05223 |
| 6                                                   | C | -1.838178 | -2.395507 | -0.000152                                           | 6 | C | 1.219311 | 2.257667 | -0.0069  |
| 7                                                   | N | -2.440106 | -3.401936 | -0.000275                                           | 7 | N | 1.451731 | 3.409719 | 0.004696 |

N9-CHO-AD\_9H  $E_{\text{tot}} = -580.374927$  a.u.  
 Gibbs free energy  $E_G = -580.293037$  a.u.

|   |   |           |           |           |
|---|---|-----------|-----------|-----------|
| 7 | N | 2.744507  | -0.235900 | 0.000188  |
| 6 | C | 2.301101  | -1.506963 | -0.000104 |
| 7 | N | 1.026912  | -1.957136 | -0.000144 |
| 6 | C | 0.156390  | -0.939526 | -0.000190 |
| 6 | C | 0.455421  | 0.431478  | -0.000065 |
| 6 | C | 1.831625  | 0.766475  | 0.000142  |
| 7 | N | -0.710496 | 1.206354  | -0.000355 |
| 6 | C | -1.696693 | 0.337886  | 0.000088  |
| 7 | N | -1.250211 | -0.998650 | 0.000031  |
| 7 | N | 2.271668  | 2.049652  | -0.000506 |
| 1 | H | 3.266142  | 2.229982  | 0.001736  |
| 1 | H | 1.612548  | 2.815148  | 0.001639  |
| 1 | H | 3.078234  | -2.277574 | 0.000388  |
| 1 | H | -2.759786 | 0.563381  | 0.000238  |
| 6 | C | -2.040600 | -2.165596 | 0.000212  |
| 8 | O | -3.255316 | -2.143632 | 0.000225  |
| 1 | H | -1.414883 | -3.081083 | 0.000244  |

N7-CHO-AD\_7H  $E_{\text{tot}} = -580.371250$  a.u.  
 Gibbs free energy  $E_G = -580.287887$  a.u.

|   |   |          |          |          |
|---|---|----------|----------|----------|
| 7 | N | -2.82581 | 0.188357 | 0.030636 |
| 6 | C | -2.60311 | -1.13892 | 0.012089 |
| 7 | N | -1.43124 | -1.79929 | -0.01165 |
| 6 | C | -0.37481 | -0.96968 | -0.01645 |
| 6 | C | -0.47225 | 0.439213 | 0.001274 |
| 6 | C | -1.76072 | 1.028716 | 0.025865 |
| 7 | N | 0.863568 | 0.902896 | -0.01164 |
| 6 | C | 1.662068 | -0.26481 | -0.03616 |
| 7 | N | 0.974726 | -1.37286 | -0.03962 |
| 7 | N | -1.99969 | 2.360637 | 0.04468  |
| 1 | H | -2.96243 | 2.668359 | 0.061535 |
| 1 | H | -1.2224  | 3.015703 | 0.041572 |
| 1 | H | -3.50418 | -1.76146 | 0.017204 |
| 1 | H | 2.748618 | -0.18635 | -0.05013 |
| 6 | C | 1.394297 | 2.188458 | -0.00404 |
| 8 | O | 0.74628  | 3.224504 | 0.016704 |
| 1 | H | 2.504262 | 2.170943 | -0.01925 |

N9-CHO-AD\_9H  $E_{\text{tot}} = -580.367327$  a.u.  
 Gibbs free energy  $E_G = -580.285083$  a.u.

|   |   |           |           |           |
|---|---|-----------|-----------|-----------|
| 7 | N | 2.829687  | -0.290032 | 0.000066  |
| 6 | C | 2.414950  | -1.572474 | 0.000336  |
| 7 | N | 1.155530  | -2.057890 | 0.000194  |
| 6 | C | 0.252752  | -1.069693 | 0.000140  |
| 6 | C | 0.523524  | 0.311043  | -0.000008 |
| 6 | C | 1.890042  | 0.684220  | -0.000166 |
| 7 | N | -0.650901 | 1.071436  | 0.000364  |
| 6 | C | -1.617521 | 0.185400  | 0.000039  |
| 7 | N | -1.158114 | -1.148565 | 0.000076  |
| 7 | N | 2.291016  | 1.981124  | -0.000799 |
| 1 | H | 3.279680  | 2.190620  | 0.001609  |
| 1 | H | 1.609197  | 2.726222  | 0.001652  |
| 1 | H | 3.211422  | -2.323298 | 0.000032  |
| 1 | H | -2.683730 | 0.405767  | 0.000020  |
| 6 | C | -2.014575 | -2.271879 | 0.000005  |
| 8 | O | -1.654413 | -3.425705 | -0.000028 |
| 1 | H | -3.082074 | -1.949620 | 0.000080  |

N7-CHO-AD\_7H  $E_{\text{tot}} = -580.362767$  a.u.  
 Gibbs free energy  $E_G = -580.27991$  a.u.

|   |   |          |          |          |
|---|---|----------|----------|----------|
| 7 | N | -2.72643 | 0.156198 | -0.03273 |
| 6 | C | -2.53719 | -1.1793  | -0.04222 |
| 7 | N | -1.37889 | -1.85769 | 0.002623 |
| 6 | C | -0.30371 | -1.05362 | 0.022024 |
| 6 | C | -0.37285 | 0.360776 | -0.00431 |
| 6 | C | -1.64565 | 0.964271 | 0.000403 |
| 7 | N | 0.969323 | 0.795639 | 0.001528 |
| 6 | C | 1.745875 | -0.38133 | 0.043379 |
| 7 | N | 1.033892 | -1.47855 | 0.057239 |
| 7 | N | -1.88156 | 2.326517 | -0.02012 |
| 1 | H | -2.85771 | 2.557447 | 0.143859 |
| 1 | H | -1.23031 | 2.923931 | 0.476716 |
| 1 | H | -3.45082 | -1.78117 | -0.07764 |
| 1 | H | 2.83096  | -0.31192 | 0.049127 |
| 6 | C | 1.495604 | 2.092409 | -0.11808 |
| 8 | O | 2.686155 | 2.336609 | -0.10238 |
| 1 | H | 0.709247 | 2.86498  | -0.24622 |

|                   |    |           |           |                                     |    |    |          |                   |          |  |  |                                     |  |  |  |
|-------------------|----|-----------|-----------|-------------------------------------|----|----|----------|-------------------|----------|--|--|-------------------------------------|--|--|--|
| N9-Cl-AD_9H       |    |           |           | E <sub>tot</sub> = -926.679501 a.u. |    |    |          | N7-Cl-AD_7H       |          |  |  | E <sub>tot</sub> = -926.670997 a.u. |  |  |  |
| Gibbs free energy |    |           |           | E <sub>G</sub> = -926.61612 a.u.    |    |    |          | Gibbs free energy |          |  |  | E <sub>G</sub> = -926.60822 a.u.    |  |  |  |
| 7                 | N  | -2.813263 | -0.031582 | 0.010803                            | 7  | N  | -2.80994 | -0.06949          | 0.017768 |  |  |                                     |  |  |  |
| 6                 | C  | -2.501077 | -1.344464 | 0.004543                            | 6  | C  | -2.47553 | -1.38183          | 0.008677 |  |  |                                     |  |  |  |
| 7                 | N  | -1.283828 | -1.923309 | -0.00297                            | 7  | N  | -1.25707 | -1.93534          | -0.00542 |  |  |                                     |  |  |  |
| 6                 | C  | -0.312389 | -1.001406 | -0.00256                            | 6  | C  | -0.26094 | -1.02558          | -0.00659 |  |  |                                     |  |  |  |
| 6                 | C  | -0.465135 | 0.399257  | 0.002792                            | 6  | C  | -0.4934  | 0.373434          | 0.000519 |  |  |                                     |  |  |  |
| 6                 | C  | -1.803147 | 0.868714  | 0.007798                            | 6  | C  | -1.82357 | 0.847701          | 0.007338 |  |  |                                     |  |  |  |
| 7                 | N  | 0.765089  | 1.055549  | 0.005446                            | 7  | N  | 0.788468 | 0.920042          | -0.01854 |  |  |                                     |  |  |  |
| 6                 | C  | 1.664284  | 0.088161  | 0.000623                            | 6  | C  | 1.701343 | -0.11971          | -0.01863 |  |  |                                     |  |  |  |
| 7                 | N  | 1.068107  | -1.170600 | -0.00488                            | 7  | N  | 1.104268 | -1.29765          | -0.02061 |  |  |                                     |  |  |  |
| 7                 | N  | -2.106724 | 2.192875  | -0.00685                            | 7  | N  | -2.17925 | 2.171512          | -0.04328 |  |  |                                     |  |  |  |
| 1                 | H  | -3.074814 | 2.471794  | 0.075864                            | 1  | H  | -3.15529 | 2.369302          | 0.144027 |  |  |                                     |  |  |  |
| 1                 | H  | -1.371716 | 2.881319  | 0.073814                            | 1  | H  | -1.50309 | 2.88129           | 0.204152 |  |  |                                     |  |  |  |
| 1                 | H  | -3.354046 | -2.030472 | 0.006672                            | 1  | H  | -3.32272 | -2.07531          | 0.015881 |  |  |                                     |  |  |  |
| 1                 | H  | 2.745850  | 0.197955  | 0.000728                            | 1  | H  | 2.772026 | 0.07174           | -0.0225  |  |  |                                     |  |  |  |
| 17                | Cl | 1.894575  | -2.681357 | -0.01067                            | 17 | Cl | 1.200857 | 2.610378          | 0.058586 |  |  |                                     |  |  |  |
|                   |    |           |           |                                     |    |    |          |                   |          |  |  |                                     |  |  |  |
| N9-F-AD_9H        |    |           |           | E <sub>tot</sub> = -566.212576 a.u. |    |    |          | N7-F-AD_7H        |          |  |  | E <sub>tot</sub> = -566.205716 a.u. |  |  |  |
| Gibbs free energy |    |           |           | E <sub>G</sub> = -566.149434 a.u.   |    |    |          | Gibbs free energy |          |  |  | E <sub>G</sub> = -566.141068 a.u.   |  |  |  |
| 7                 | N  | -2.420863 | -0.153021 | 0.018612                            | 7  | N  | -2.41746 | -0.18549          | 0.027054 |  |  |                                     |  |  |  |
| 6                 | C  | -2.029488 | -1.444873 | 0.003636                            | 6  | C  | -2.00367 | -1.47591          | 0.019985 |  |  |                                     |  |  |  |
| 7                 | N  | -0.781008 | -1.952904 | -0.006947                           | 7  | N  | -0.75362 | -1.95657          | -0.00561 |  |  |                                     |  |  |  |
| 6                 | C  | 0.130221  | -0.969674 | -0.000767                           | 6  | C  | 0.1879   | -0.99223          | -0.00537 |  |  |                                     |  |  |  |
| 6                 | C  | -0.103011 | 0.422643  | 0.014515                            | 6  | C  | -0.13359 | 0.389182          | 0.001511 |  |  |                                     |  |  |  |
| 6                 | C  | -1.468545 | 0.807711  | 0.024368                            | 6  | C  | -1.48697 | 0.786921          | 0.003553 |  |  |                                     |  |  |  |
| 7                 | N  | 1.080350  | 1.157816  | 0.016989                            | 7  | N  | 1.107094 | 0.994942          | -0.10065 |  |  |                                     |  |  |  |
| 6                 | C  | 2.046185  | 0.252334  | 0.003543                            | 6  | C  | 2.094015 | 0.033891          | -0.03796 |  |  |                                     |  |  |  |
| 7                 | N  | 1.513205  | -1.023904 | -0.007128                           | 7  | N  | 1.569943 | -1.18118          | -0.04036 |  |  |                                     |  |  |  |
| 7                 | N  | -1.851221 | 2.109529  | 0.039282                            | 7  | N  | -1.90212 | 2.091333          | -0.05353 |  |  |                                     |  |  |  |
| 1                 | H  | -2.836826 | 2.332922  | 0.046444                            | 1  | H  | -2.88617 | 2.252387          | 0.126297 |  |  |                                     |  |  |  |
| 1                 | H  | -1.159120 | 2.845250  | 0.044523                            | 1  | H  | -1.25617 | 2.831819          | 0.185109 |  |  |                                     |  |  |  |
| 1                 | H  | -2.840201 | -2.180417 | -0.000426                           | 1  | H  | -2.80726 | -2.2191           | 0.035566 |  |  |                                     |  |  |  |
| 1                 | H  | 3.119039  | 0.424615  | 0.000723                            | 1  | H  | 3.148841 | 0.297721          | -0.03675 |  |  |                                     |  |  |  |
| 9                 | F  | 2.261545  | -2.177326 | -0.022663                           | 9  | F  | 1.333613 | 2.347926          | 0.200396 |  |  |                                     |  |  |  |
|                   |    |           |           |                                     |    |    |          |                   |          |  |  |                                     |  |  |  |
| N9-H-AD_9H        |    |           |           | E <sub>tot</sub> = -467.096786 a.u. |    |    |          | N7-H-AD_7H        |          |  |  | E <sub>tot</sub> = -467.085338 a.u. |  |  |  |
| Gibbs free energy |    |           |           | E <sub>G</sub> = -467.019892 a.u.   |    |    |          | Gibbs free energy |          |  |  | E <sub>G</sub> = -467.00833 a.u.    |  |  |  |
| 7                 | N  | 1.962029  | 0.527275  | 0.004592                            | 7  | N  | -1.96277 | -0.50017          | -0.01    |  |  |                                     |  |  |  |
| 6                 | C  | 1.304445  | 1.706449  | 0.002924                            | 6  | C  | -1.32248 | -1.69578          | -0.00871 |  |  |                                     |  |  |  |
| 7                 | N  | -0.02351  | 1.934087  | -0.00124                            | 7  | N  | -0.0069  | -1.94233          | 0.012901 |  |  |                                     |  |  |  |
| 6                 | C  | -0.71338  | 0.780032  | -0.00262                            | 6  | C  | 0.742057 | -0.8186           | 0.01347  |  |  |                                     |  |  |  |
| 6                 | C  | -0.17923  | -0.52523  | -0.00271                            | 6  | C  | 0.182197 | 0.48572           | -0.00383 |  |  |                                     |  |  |  |
| 6                 | C  | 1.234633  | -0.6137   | -0.00179                            | 6  | C  | -1.2189  | 0.620205          | -0.00265 |  |  |                                     |  |  |  |
| 7                 | N  | -1.18892  | -1.48459  | 0.002006                            | 7  | N  | 1.272567 | 1.348798          | -0.01317 |  |  |                                     |  |  |  |
| 6                 | C  | -2.30842  | -0.7791   | 0.002786                            | 6  | C  | 2.402066 | 0.548237          | -0.00608 |  |  |                                     |  |  |  |
| 7                 | N  | -2.08635  | 0.591594  | -0.00028                            | 7  | N  | 2.131882 | -0.74505          | 0.016318 |  |  |                                     |  |  |  |
| 7                 | N  | 1.889474  | -1.80705  | -0.03371                            | 7  | N  | -1.87607 | 1.839342          | -0.05822 |  |  |                                     |  |  |  |
| 1                 | H  | 2.892382  | -1.80781  | 0.096014                            | 1  | H  | -2.87193 | 1.76392           | 0.130168 |  |  |                                     |  |  |  |
| 1                 | H  | 1.367686  | -2.66248  | 0.09916                             | 1  | H  | -1.4308  | 2.624304          | 0.404726 |  |  |                                     |  |  |  |
| 1                 | H  | 1.940976  | 2.597346  | 0.008033                            | 1  | H  | -1.98003 | -2.57131          | -0.01873 |  |  |                                     |  |  |  |
| 1                 | H  | -3.31484  | -1.19342  | 0.006012                            | 1  | H  | 3.400837 | 0.982174          | -0.01724 |  |  |                                     |  |  |  |
| 1                 | H  | -2.78351  | 1.326384  | -0.00041                            | 1  | H  | 1.261259 | 2.358063          | -0.08695 |  |  |                                     |  |  |  |

|                   |   |           |           |                                     |   |   |          |                   |          |  |  |                                       |  |  |  |
|-------------------|---|-----------|-----------|-------------------------------------|---|---|----------|-------------------|----------|--|--|---------------------------------------|--|--|--|
| N9-Me-AD_9H       |   |           |           | E <sub>tot</sub> = -506.385688 a.u. |   |   |          | N7-Me-AD_7H       |          |  |  | E <sub>tot</sub> = -506.37318104 a.u. |  |  |  |
| Gibbs free energy |   |           |           | E <sub>G</sub> = -506.283306 a.u.   |   |   |          | Gibbs free energy |          |  |  | E <sub>G</sub> = -506.270869 a.u.     |  |  |  |
| 7                 | N | -2.450516 | -0.103569 | 0.009877                            | 7 | N | 2.446743 | -0.14999          | 0.009402 |  |  |                                       |  |  |  |
| 6                 | C | -2.083262 | -1.403057 | 0.006481                            | 6 | C | 2.057048 | -1.44874          | -0.00936 |  |  |                                       |  |  |  |
| 7                 | N | -0.843296 | -1.930292 | -0.000717                           | 7 | N | 0.816832 | -1.94935          | -0.03205 |  |  |                                       |  |  |  |
| 6                 | C | 0.094587  | -0.965434 | -0.002740                           | 6 | C | -0.13973 | -0.99552          | -0.01999 |  |  |                                       |  |  |  |
| 6                 | C | -0.124525 | 0.427846  | -0.001128                           | 6 | C | 0.147375 | 0.397285          | 0.010573 |  |  |                                       |  |  |  |
| 6                 | C | -1.479411 | 0.839344  | 0.002305                            | 6 | C | 1.49752  | 0.803244          | 0.018128 |  |  |                                       |  |  |  |
| 7                 | N | 1.080340  | 1.123197  | 0.002965                            | 7 | N | -1.09358 | 1.031363          | 0.039096 |  |  |                                       |  |  |  |
| 6                 | C | 2.000718  | 0.169386  | 0.001831                            | 6 | C | -2.03139 | 0.015335          | 0.017295 |  |  |                                       |  |  |  |
| 7                 | N | 1.472158  | -1.114897 | -0.002203                           | 7 | N | -1.51288 | -1.20176          | -0.01895 |  |  |                                       |  |  |  |
| 7                 | N | -1.842904 | 2.152234  | -0.030960                           | 7 | N | 1.922128 | 2.121822          | 0.1011   |  |  |                                       |  |  |  |
| 1                 | H | -2.816749 | 2.381943  | 0.116650                            | 1 | H | 2.914047 | 2.228108          | -0.09156 |  |  |                                       |  |  |  |
| 1                 | H | -1.137460 | 2.861610  | 0.114693                            | 1 | H | 1.339939 | 2.82766           | -0.33339 |  |  |                                       |  |  |  |
| 1                 | H | -2.908600 | -2.122618 | 0.011991                            | 1 | H | 2.875441 | -2.17637          | -0.01296 |  |  |                                       |  |  |  |
| 1                 | H | 3.077584  | 0.332237  | 0.004023                            | 1 | H | -3.0969  | 0.244056          | 0.033242 |  |  |                                       |  |  |  |
| 6                 | C | 2.191342  | -2.381488 | -0.003453                           | 6 | C | -1.37121 | 2.459976          | 0.087823 |  |  |                                       |  |  |  |
| 1                 | H | 1.926846  | -2.966437 | 0.890166                            | 1 | H | -0.84714 | 2.923233          | 0.937307 |  |  |                                       |  |  |  |
| 1                 | H | 1.927557  | -2.964163 | -0.898744                           | 1 | H | -1.06715 | 2.953372          | -0.8506  |  |  |                                       |  |  |  |
| 1                 | H | 3.269596  | -2.173625 | -0.002827                           | 1 | H | -2.45227 | 2.601812          | 0.219406 |  |  |                                       |  |  |  |
| N9-OMe-AD_9H      |   |           |           | E <sub>tot</sub> = -581.508846 a.u. |   |   |          | N7-OMe-AD_7H      |          |  |  | E <sub>tot</sub> = -581.501347 a.u.   |  |  |  |
| Gibbs free energy |   |           |           | E <sub>G</sub> = -581.405627 a.u.   |   |   |          | Gibbs free energy |          |  |  | E <sub>G</sub> = -581.397678 a.u.     |  |  |  |
| 7                 | N | -2.510247 | 0.037766  | -0.391422                           | 7 | N | -2.53626 | -0.35058          | 0.323233 |  |  |                                       |  |  |  |
| 6                 | C | -2.198395 | -1.274229 | -0.329004                           | 6 | C | -1.94163 | -1.50205          | 0.729734 |  |  |                                       |  |  |  |
| 7                 | N | -1.020709 | -1.850729 | -0.017466                           | 7 | N | -0.64819 | -1.84254          | 0.680655 |  |  |                                       |  |  |  |
| 6                 | C | -0.089209 | -0.921640 | 0.258895                            | 6 | C | 0.139075 | -0.87098          | 0.168613 |  |  |                                       |  |  |  |
| 6                 | C | -0.248257 | 0.480013  | 0.231682                            | 6 | C | -0.3744  | 0.378346          | -0.26526 |  |  |                                       |  |  |  |
| 6                 | C | -1.541527 | 0.942143  | -0.117268                           | 6 | C | -1.75965 | 0.617505          | -0.19282 |  |  |                                       |  |  |  |
| 7                 | N | 0.928927  | 1.141277  | 0.572816                            | 7 | N | 0.74333  | 1.068171          | -0.71135 |  |  |                                       |  |  |  |
| 6                 | C | 1.801912  | 0.169407  | 0.794762                            | 6 | C | 1.842231 | 0.253733          | -0.53159 |  |  |                                       |  |  |  |
| 7                 | N | 1.242028  | -1.086467 | 0.615578                            | 7 | N | 1.517218 | -0.92331          | -0.01428 |  |  |                                       |  |  |  |
| 7                 | N | -1.837083 | 2.267341  | -0.214445                           | 7 | N | -2.34603 | 1.81091           | -0.57093 |  |  |                                       |  |  |  |
| 1                 | H | -2.804804 | 2.534803  | -0.336688                           | 1 | H | -3.35613 | 1.760662          | -0.66067 |  |  |                                       |  |  |  |
| 1                 | H | -1.169525 | 2.948552  | 0.120960                            | 1 | H | -1.87391 | 2.337653          | -1.29776 |  |  |                                       |  |  |  |
| 1                 | H | -3.017382 | -1.962058 | -0.563158                           | 1 | H | -2.62441 | -2.25098          | 1.144179 |  |  |                                       |  |  |  |
| 1                 | H | 2.840565  | 0.281035  | 1.097021                            | 1 | H | 2.839577 | 0.584679          | -0.81426 |  |  |                                       |  |  |  |
| 8                 | O | 1.890796  | -2.276989 | 0.870633                            | 8 | O | 0.763669 | 2.365429          | -1.20413 |  |  |                                       |  |  |  |
| 6                 | C | 2.145052  | -2.986402 | -0.374840                           | 6 | C | 0.847447 | 3.314218          | -0.10088 |  |  |                                       |  |  |  |
| 1                 | H | 2.678234  | -3.895158 | -0.065137                           | 1 | H | -0.03796 | 3.22091           | 0.547772 |  |  |                                       |  |  |  |
| 1                 | H | 1.192975  | -3.243140 | -0.862516                           | 1 | H | 1.77189  | 3.144644          | 0.473627 |  |  |                                       |  |  |  |
| 1                 | H | 2.777799  | -2.371971 | -1.036586                           | 1 | H | 0.869213 | 4.299656          | -0.58569 |  |  |                                       |  |  |  |

|                   |   |           |           |                                     |   |   |          |          |          |
|-------------------|---|-----------|-----------|-------------------------------------|---|---|----------|----------|----------|
| N9-OH-AD_9H       |   |           |           | E <sub>tot</sub> = -542.229559 a.u. |   |   |          |          |          |
| Gibbs free energy |   |           |           | E <sub>G</sub> = -542.152512 a.u.   |   |   |          |          |          |
| 7                 | N | -2.305009 | -0.204970 | -0.042086                           | 7 | N | -2.38376 | -0.12831 | 0.13653  |
| 6                 | C | -1.853037 | -1.475369 | -0.093507                           | 6 | C | -2.00841 | -1.43297 | 0.114493 |
| 7                 | N | -0.576833 | -1.912508 | -0.080414                           | 7 | N | -0.77869 | -1.95154 | 0.015696 |
| 6                 | C | 0.273483  | -0.875755 | -0.005510                           | 6 | C | 0.190107 | -1.0126  | -0.0563  |
| 6                 | C | -0.023402 | 0.499803  | 0.055895                            | 6 | C | -0.08837 | 0.377706 | -0.02098 |
| 6                 | C | -1.407512 | 0.808426  | 0.034837                            | 6 | C | -1.42567 | 0.811945 | 0.066478 |
| 7                 | N | 1.136007  | 1.262268  | 0.122557                            | 7 | N | 1.162893 | 0.972569 | -0.08982 |
| 6                 | C | 2.127457  | 0.373339  | 0.103196                            | 6 | C | 2.105878 | -0.02905 | -0.19567 |
| 7                 | N | 1.647577  | -0.918968 | 0.027065                            | 7 | N | 1.559197 | -1.23555 | -0.16685 |
| 7                 | N | -1.870580 | 2.083049  | 0.099941                            | 7 | N | -1.7939  | 2.140213 | 0.134858 |
| 1                 | H | -2.865064 | 2.248886  | 0.029327                            | 1 | H | -2.7849  | 2.303951 | -0.01177 |
| 1                 | H | -1.222714 | 2.858162  | 0.102415                            | 1 | H | -1.17014 | 2.814024 | -0.29445 |
| 1                 | H | -2.624935 | -2.248814 | -0.154308                           | 1 | H | -2.83295 | -2.15038 | 0.179653 |
| 1                 | H | 3.192765  | 0.584911  | 0.140208                            | 1 | H | 3.164979 | 0.203483 | -0.28749 |
| 8                 | O | 2.417125  | -2.073211 | -0.011583                           | 8 | O | 1.415166 | 2.342025 | -0.1898  |
| 1                 | H | 1.740027  | -2.779454 | -0.064406                           | 1 | H | 1.535616 | 2.640703 | 0.730742 |

|                           |   |           |           |                                     |   |   |          |          |          |
|---------------------------|---|-----------|-----------|-------------------------------------|---|---|----------|----------|----------|
| N9-NH <sub>2</sub> -AD_9H |   |           |           | E <sub>tot</sub> = -522.395376 a.u. |   |   |          |          |          |
| Gibbs free energy         |   |           |           | E <sub>G</sub> = -522.297862 a.u.   |   |   |          |          |          |
| 7                         | N | 2.380696  | -0.164701 | 0.078897                            | 7 | N | -2.12393 | 0.625906 | -0.07454 |
| 6                         | C | 1.979598  | -1.452799 | 0.093225                            | 6 | C | -2.34242 | -0.71339 | -0.09109 |
| 7                         | N | 0.724962  | -1.946608 | 0.046701                            | 7 | N | -1.45503 | -1.71394 | -0.02447 |
| 6                         | C | -0.178350 | -0.954815 | -0.023435                           | 6 | C | -0.17887 | -1.27892 | 0.08035  |
| 6                         | C | 0.072554  | 0.430527  | -0.047080                           | 6 | C | 0.166873 | 0.092241 | 0.110552 |
| 6                         | C | 1.437249  | 0.805318  | 0.011817                            | 6 | C | -0.85333 | 1.061854 | 0.019326 |
| 7                         | N | -1.112897 | 1.158866  | -0.130738                           | 7 | N | 1.552105 | 0.117297 | 0.226936 |
| 6                         | C | -2.062925 | 0.236648  | -0.155738                           | 6 | C | 1.966397 | -1.2065  | 0.262553 |
| 7                         | N | -1.562133 | -1.056921 | -0.093003                           | 7 | N | 0.966373 | -2.06777 | 0.176647 |
| 7                         | N | 1.836036  | 2.106226  | 0.027819                            | 7 | N | -0.6077  | 2.409811 | -0.02213 |
| 1                         | H | 2.823544  | 2.309695  | -0.048243                           | 1 | H | -1.40515 | 3.021511 | 0.100249 |
| 1                         | H | 1.158404  | 2.835760  | -0.145995                           | 1 | H | 0.310055 | 2.73795  | 0.252611 |
| 1                         | H | 2.783363  | -2.194158 | 0.148709                            | 1 | H | -3.39487 | -1.00595 | -0.17013 |
| 1                         | H | -3.134771 | 0.411760  | -0.217875                           | 1 | H | 3.022307 | -1.46061 | 0.355977 |
| 7                         | N | -2.348879 | -2.220731 | -0.104496                           | 7 | N | 2.320652 | 1.293652 | 0.335376 |
| 1                         | H | -2.029775 | -2.795552 | -0.890194                           | 1 | H | 2.871907 | 1.245883 | 1.195308 |
| 1                         | H | -2.120496 | -2.750431 | 0.742201                            | 1 | H | 2.96801  | 1.337992 | -0.45529 |

| N3-NO <sub>2</sub> -AD_3H |   | E <sub>tot</sub> = -671.477355 a.u. |          |          |
|---------------------------|---|-------------------------------------|----------|----------|
| Gibbs free energy         |   | E <sub>G</sub> = -671.403201 a.u.   |          |          |
| 7                         | N | -2.7773                             | 0.027249 | 0.0004   |
| 6                         | C | -2.52707                            | -1.25953 | 7.52E-05 |
| 7                         | N | -1.26534                            | -1.81187 | -0.00025 |
| 6                         | C | -0.15275                            | -0.97858 | -0.0002  |
| 6                         | C | -0.40536                            | 0.435891 | 0.000162 |
| 6                         | C | -1.72224                            | 0.914953 | 0.000426 |
| 7                         | N | 0.804574                            | 1.085182 | 0.000267 |
| 6                         | C | 1.681111                            | 0.061891 | -8.4E-05 |
| 7                         | N | 1.164392                            | -1.22254 | -0.00032 |
| 7                         | N | -2.03047                            | 2.229246 | 0.000536 |
| 1                         | H | -2.99894                            | 2.51909  | 0.00163  |
| 1                         | H | -1.28541                            | 2.913659 | 0.001334 |
| 1                         | H | -3.3461                             | -1.97689 | 5.04E-05 |
| 1                         | H | 2.7599                              | 0.220202 | -9.3E-05 |
| 7                         | N | -1.16273                            | -3.33664 | -0.00068 |
| 8                         | O | -0.03913                            | -3.7683  | -0.0012  |
| 8                         | O | -2.23121                            | -3.9196  | -0.00024 |

| N1-NO <sub>2</sub> -AD_1H |   | E <sub>tot</sub> = -671.46525243 a.u. |          |          |
|---------------------------|---|---------------------------------------|----------|----------|
| Gibbs free energy         |   | E <sub>G</sub> = -671.392863a.u.      |          |          |
| 7                         | N | 2.656686                              | 0.24338  | 0.011821 |
| 6                         | C | 2.502994                              | -1.17429 | 0.011646 |
| 7                         | N | 1.360796                              | -1.78633 | 0.012885 |
| 6                         | C | 0.249064                              | -0.97894 | 0.006173 |
| 6                         | C | 0.327018                              | 0.454863 | 0.017978 |
| 6                         | C | 1.551423                              | 1.118154 | 0.015819 |
| 7                         | N | -0.9407                               | 0.985578 | 0.009605 |
| 6                         | C | -1.69917                              | -0.13504 | -0.00432 |
| 7                         | N | -1.04413                              | -1.34975 | -0.00626 |
| 7                         | N | 1.647155                              | 2.462755 | -0.06229 |
| 1                         | H | 2.507471                              | 2.944408 | 0.155964 |
| 1                         | H | 0.755688                              | 2.946426 | -0.02149 |
| 1                         | H | 3.447904                              | -1.71175 | 0.024863 |
| 1                         | H | -2.78896                              | -0.08555 | -0.01111 |
| 7                         | N | 4.040067                              | 0.738297 | 0.035553 |
| 8                         | O | 4.901758                              | -0.07913 | -0.21965 |
| 8                         | O | 4.198566                              | 1.918163 | 0.323123 |

| N3-CN-AD_3H       |   | E <sub>tot</sub> = -559.245777 a.u. |          |          |
|-------------------|---|-------------------------------------|----------|----------|
| Gibbs free energy |   | E <sub>G</sub> = -559.173896 a.u.   |          |          |
| 7                 | N | -2.77514                            | 0.005039 | 0.000294 |
| 6                 | C | -2.54144                            | -1.27687 | 2.19E-05 |
| 7                 | N | -1.26724                            | -1.85239 | -0.00027 |
| 6                 | C | -0.16932                            | -0.98391 | -0.00021 |
| 6                 | C | -0.40507                            | 0.422687 | 9.14E-05 |
| 6                 | C | -1.72256                            | 0.901019 | 0.000283 |
| 7                 | N | 0.819897                            | 1.050807 | 0.00031  |
| 6                 | C | 1.677521                            | 0.009539 | -0.00026 |
| 7                 | N | 1.131584                            | -1.2668  | -0.0003  |
| 7                 | N | -2.04057                            | 2.212037 | 0.000129 |
| 1                 | H | -3.01088                            | 2.495988 | 0.002036 |
| 1                 | H | -1.30106                            | 2.902502 | 0.001626 |
| 1                 | H | -3.365                              | -1.99348 | 4E-05    |
| 1                 | H | 2.758718                            | 0.148425 | -0.00021 |
| 6                 | C | -1.129                              | -3.20313 | -0.00055 |
| 7                 | N | -1.06102                            | -4.37267 | -0.00078 |

| N1-CN-AD_1H       |   | E <sub>tot</sub> = -559.234917 a.u. |          |          |
|-------------------|---|-------------------------------------|----------|----------|
| Gibbs free energy |   | E <sub>G</sub> = -559.165285 a.u.   |          |          |
| 7                 | N | 2.663727                            | 0.240794 | 0.024688 |
| 6                 | C | 2.51102                             | -1.18871 | -0.0039  |
| 7                 | N | 1.371089                            | -1.79331 | -0.02279 |
| 6                 | C | 0.257725                            | -0.9846  | -0.01417 |
| 6                 | C | 0.322554                            | 0.457298 | 0.014199 |
| 6                 | C | 1.54886                             | 1.10367  | 0.034375 |
| 7                 | N | -0.9501                             | 0.973484 | 0.016141 |
| 6                 | C | -1.6971                             | -0.15437 | -0.01042 |
| 7                 | N | -1.03171                            | -1.36268 | -0.0296  |
| 7                 | N | 1.743437                            | 2.438327 | 0.061228 |
| 1                 | H | 2.662832                            | 2.860819 | 0.07593  |
| 1                 | H | 0.917644                            | 3.023942 | 0.067534 |
| 1                 | H | 3.464585                            | -1.71948 | -0.00812 |
| 1                 | H | -2.78729                            | -0.11543 | -0.0165  |
| 6                 | C | 3.907769                            | 0.766064 | 0.042725 |
| 7                 | N | 4.977422                            | 1.24908  | 0.058885 |



N3-CHO-AD\_3H  $E_{\text{tot}} = -580.360120$  a.u.  
 Gibbs free energy  $E_{\text{G}} = -580.27727$  a.u.

|   |   |          |          |          |
|---|---|----------|----------|----------|
| 7 | N | -2.81742 | 0.167658 | 0.000128 |
| 6 | C | -2.71025 | -1.13648 | -3.7E-05 |
| 7 | N | -1.51578 | -1.83841 | -9.6E-05 |
| 6 | C | -0.33895 | -1.09138 | -2.5E-05 |
| 6 | C | -0.41172 | 0.331053 | 0.00014  |
| 6 | C | -1.67226 | 0.944424 | 0.000204 |
| 7 | N | 0.874989 | 0.824711 | 0.00069  |
| 6 | C | 1.613536 | -0.30296 | -0.00068 |
| 7 | N | 0.931896 | -1.51144 | 0.000157 |
| 7 | N | -1.85054 | 2.281935 | 0.000175 |
| 1 | H | -2.78689 | 2.663566 | 0.001551 |
| 1 | H | -1.04344 | 2.891916 | 0.001408 |
| 1 | H | -3.604   | -1.76174 | -3.6E-05 |
| 1 | H | 2.703656 | -0.28212 | -0.00035 |
| 6 | C | -1.49166 | -3.27221 | -0.00018 |
| 8 | O | -2.49661 | -3.94893 | -0.00017 |
| 1 | H | -0.45082 | -3.64914 | -6.2E-05 |

N1-CHO-AD\_1H  $E_{\text{tot}} = -580.339335$  a.u.  
 Gibbs free energy  $E_{\text{G}} = -580.256612$  a.u.

|   |   |          |          |          |
|---|---|----------|----------|----------|
| 7 | N | 2.682397 | 0.133981 | 0.023441 |
| 6 | C | 2.507068 | -1.27607 | 0.067464 |
| 7 | N | 1.363567 | -1.89071 | 0.050699 |
| 6 | C | 0.2572   | -1.07735 | -0.01431 |
| 6 | C | 0.341987 | 0.365783 | -0.04657 |
| 6 | C | 1.571717 | 0.991625 | 0.007244 |
| 7 | N | -0.9278  | 0.899153 | -0.04941 |
| 6 | C | -1.68627 | -0.21665 | -0.03309 |
| 7 | N | -1.0352  | -1.43815 | -0.0003  |
| 7 | N | 1.738374 | 2.357876 | -0.00684 |
| 1 | H | 2.431454 | 2.763706 | 0.614171 |
| 1 | H | 0.839273 | 2.83367  | 0.040359 |
| 1 | H | 3.450507 | -1.82023 | 0.099519 |
| 1 | H | -2.77627 | -0.16678 | -0.03925 |
| 6 | C | 4.009798 | 0.637719 | -0.12443 |
| 8 | O | 5.00343  | -0.04652 | -0.01227 |
| 1 | H | 4.02893  | 1.713806 | -0.38612 |

N3-CHO-AD\_3H  $E_{\text{tot}} = -580.351426$  a.u.  
 Gibbs free energy  $E_{\text{G}} = -580.269146$  a.u.

|   |   |          |          |          |
|---|---|----------|----------|----------|
| 7 | N | -2.70587 | 0.178098 | 0.000313 |
| 6 | C | -2.55931 | -1.11987 | 0.000141 |
| 7 | N | -1.35554 | -1.81146 | -9.2E-05 |
| 6 | C | -0.18793 | -1.04419 | -8.7E-05 |
| 6 | C | -0.30803 | 0.382933 | 9.2E-05  |
| 6 | C | -1.57654 | 0.975815 | 0.000251 |
| 7 | N | 0.956436 | 0.921791 | 0.000143 |
| 6 | C | 1.733898 | -0.18154 | -7.7E-06 |
| 7 | N | 1.09886  | -1.41164 | -0.00014 |
| 7 | N | -1.77495 | 2.310673 | 9.2E-05  |
| 1 | H | -2.71574 | 2.680627 | 0.001536 |
| 1 | H | -0.9749  | 2.930064 | 0.001114 |
| 1 | H | -3.4516  | -1.75128 | 0.00019  |
| 1 | H | 2.822858 | -0.12243 | -1E-05   |
| 6 | C | -1.41108 | -3.24592 | -0.0003  |
| 8 | O | -0.45212 | -3.97389 | -0.00052 |
| 1 | H | -2.46932 | -3.59287 | -0.00019 |

N1-CHO-AD\_1H  $E_{\text{tot}} = -580.347637$  a.u.  
 Gibbs free energy  $E_{\text{G}} = -580.264507$  a.u.

|   |   |          |          |          |
|---|---|----------|----------|----------|
| 7 | N | 2.674345 | 0.288923 | 0.005122 |
| 6 | C | 2.517332 | -1.13291 | -0.01834 |
| 7 | N | 1.393466 | -1.77108 | -0.02806 |
| 6 | C | 0.267558 | -0.97659 | -0.01397 |
| 6 | C | 0.321466 | 0.461053 | 0.009918 |
| 6 | C | 1.540615 | 1.129849 | 0.02001  |
| 7 | N | -0.95657 | 0.966886 | 0.019343 |
| 6 | C | -1.69464 | -0.16599 | 0.001081 |
| 7 | N | -1.01813 | -1.36963 | -0.01951 |
| 7 | N | 1.673777 | 2.469452 | 0.042029 |
| 1 | H | 2.590322 | 2.902331 | 0.048634 |
| 1 | H | 0.815109 | 3.006575 | 0.052018 |
| 1 | H | 3.467892 | -1.67118 | -0.02798 |
| 6 | H | -2.7853  | -0.13707 | 0.002477 |
| 1 | C | 3.996225 | 0.776626 | 0.012002 |
| 1 | O | 4.316658 | 1.952708 | 0.031242 |
| 8 | H | 4.735718 | -0.04976 | -0.00243 |

N3-Cl-AD\_3H  $E_{\text{tot}} = -926.669178$  a.u.  
Gibbs free energy  $E_G = -926.605777$  a.u.

|    |    |          |          |          |
|----|----|----------|----------|----------|
| 7  | N  | -2.78318 | 0.029191 | 0.000415 |
| 6  | C  | -2.54584 | -1.26662 | 0.000168 |
| 7  | N  | -1.28957 | -1.80613 | -0.00035 |
| 6  | C  | -0.18704 | -0.98552 | -0.00042 |
| 6  | C  | -0.41517 | 0.430865 | -0.00014 |
| 6  | C  | -1.73654 | 0.913298 | 0.000174 |
| 7  | N  | 0.808648 | 1.051031 | -0.00057 |
| 6  | C  | 1.665108 | 0.006326 | 0.000617 |
| 7  | N  | 1.120357 | -1.26408 | -0.00078 |
| 7  | N  | -2.03281 | 2.234643 | -0.00049 |
| 1  | H  | -2.99709 | 2.535912 | 0.002599 |
| 1  | H  | -1.2813  | 2.9109   | 0.001832 |
| 1  | H  | -3.36908 | -1.98193 | 0.000289 |
| 1  | H  | 2.746258 | 0.145058 | 0.000346 |
| 17 | Cl | -1.10206 | -3.55386 | -0.00074 |

N1-Cl-AD\_1H  $E_{\text{tot}} = -926.654125$  a.u.  
Gibbs free energy  $E_G = -926.590587$  a.u.

|    |    |          |          |          |
|----|----|----------|----------|----------|
| 7  | N  | 2.633253 | 0.220162 | 0.003839 |
| 6  | C  | 2.507219 | -1.17674 | 0.004585 |
| 7  | N  | 1.356754 | -1.78511 | -0.00784 |
| 6  | C  | 0.244851 | -0.98511 | -0.01426 |
| 6  | C  | 0.31428  | 0.453804 | -0.01017 |
| 6  | C  | 1.557079 | 1.092119 | -0.00311 |
| 7  | N  | -0.94717 | 0.980988 | -0.0032  |
| 6  | C  | -1.70473 | -0.14925 | -0.00551 |
| 7  | N  | -1.05305 | -1.357   | -0.01156 |
| 7  | N  | 1.729864 | 2.438417 | -0.05745 |
| 1  | H  | 2.601808 | 2.853112 | 0.246752 |
| 1  | H  | 0.879231 | 2.974822 | 0.078561 |
| 1  | H  | 3.456401 | -1.71383 | 0.01611  |
| 1  | H  | -2.79488 | -0.09768 | -0.00126 |
| 17 | Cl | 4.258061 | 0.884796 | 0.039076 |

N3-F-AD\_3H  $E_{\text{tot}} = -566.205357$  a.u.  
Gibbs free energy  $E_G = -566.140402$  a.u.

|   |   |          |          |          |
|---|---|----------|----------|----------|
| 7 | N | -2.79193 | 0.033398 | 0.000232 |
| 6 | C | -2.5517  | -1.26487 | 8.72E-05 |
| 7 | N | -1.29448 | -1.77683 | -0.00032 |
| 6 | C | -0.17656 | -0.98886 | -0.00039 |
| 6 | C | -0.41728 | 0.42757  | -0.00022 |
| 6 | C | -1.7406  | 0.911017 | 1.46E-05 |
| 7 | N | 0.804483 | 1.049975 | -0.00027 |
| 6 | C | 1.666947 | 0.009941 | 0.000238 |
| 7 | N | 1.131881 | -1.26556 | -0.00063 |
| 7 | N | -2.02974 | 2.234132 | -0.00057 |
| 1 | H | -2.99237 | 2.540495 | 0.002776 |
| 1 | H | -1.27483 | 2.906609 | 0.002011 |
| 1 | H | -3.36158 | -1.99544 | 0.000197 |
| 1 | H | 2.747514 | 0.154001 | 0.000279 |
| 9 | F | -1.16951 | -3.16962 | -0.00044 |

N1-F-AD\_1H  $E_{\text{tot}} = -566.192113$  a.u.  
Gibbs free energy  $E_G = -566.126786$  a.u.

|   |   |          |          |          |
|---|---|----------|----------|----------|
| 7 | N | 2.586115 | 0.209885 | 0.000213 |
| 6 | C | 2.503965 | -1.17488 | 0.006816 |
| 7 | N | 1.352731 | -1.79269 | -0.00444 |
| 6 | C | 0.24316  | -0.9892  | -0.01311 |
| 6 | C | 0.298387 | 0.456345 | -0.01196 |
| 6 | C | 1.537952 | 1.100457 | -0.0037  |
| 7 | N | -0.96585 | 0.971803 | -0.00836 |
| 6 | C | -1.7141  | -0.16626 | -0.00882 |
| 7 | N | -1.05388 | -1.36682 | -0.01167 |
| 7 | N | 1.75796  | 2.439718 | -0.05575 |
| 1 | H | 2.652107 | 2.81653  | 0.230666 |
| 1 | H | 0.933034 | 3.00913  | 0.098098 |
| 1 | H | 3.465811 | -1.68906 | 0.020065 |
| 1 | H | -2.80445 | -0.12243 | -0.00582 |
| 9 | F | 3.868404 | 0.771293 | 0.04035  |

N3-H-AD\_3H  $E_{\text{tot}} = -467.085495$  a.u.  
Gibbs free energy  $E_G = -467.008726$  a.u.

|   |   |          |          |          |
|---|---|----------|----------|----------|
| 7 | N | 1.956751 | 0.45435  | 0.000391 |
| 6 | C | 1.376085 | 1.637636 | 0.000118 |
| 7 | N | 0.027617 | 1.844188 | -0.00022 |
| 6 | C | -0.80757 | 0.749745 | 0.000092 |
| 6 | C | -0.23136 | -0.55468 | 0.000106 |
| 6 | C | 1.170301 | -0.6737  | -6.9E-05 |
| 7 | N | -1.256   | -1.47343 | 0.000079 |
| 6 | C | -2.3504  | -0.67884 | 0.000098 |
| 7 | N | -2.14758 | 0.689367 | -5.4E-05 |
| 7 | N | 1.805039 | -1.86988 | -0.00118 |
| 1 | H | 2.814875 | -1.90314 | 0.00295  |
| 1 | H | 1.259925 | -2.72134 | 0.002325 |
| 1 | H | 1.998167 | 2.535542 | 0.000062 |
| 1 | H | -3.3607  | -1.09023 | 0.000181 |
| 1 | H | -0.35538 | 2.786045 | -0.00071 |

N1-H-AD\_1H  $E_{\text{tot}} = -467.069792$  a.u.  
Gibbs free energy  $E_G = -466.99272$  a.u.

|   |   |          |          |          |
|---|---|----------|----------|----------|
| 7 | N | 1.843838 | -0.48974 | -0.00037 |
| 6 | C | 1.238324 | -1.74401 | 0.005322 |
| 7 | N | -0.0518  | -1.94645 | 0.002588 |
| 6 | C | -0.8139  | -0.80699 | -0.00787 |
| 6 | C | -0.25316 | 0.529442 | -0.00976 |
| 6 | C | 1.1257   | 0.687191 | -0.00332 |
| 7 | N | -1.26468 | 1.454384 | 0.003038 |
| 6 | C | -2.35845 | 0.651982 | 0.008009 |
| 7 | N | -2.15946 | -0.7083  | 0.0051   |
| 7 | N | 1.789146 | 1.88985  | -0.07085 |
| 1 | H | 2.673125 | 1.975185 | 0.421389 |
| 1 | H | 1.168191 | 2.684323 | 0.060485 |
| 1 | H | 1.937806 | -2.58348 | 0.014141 |
| 1 | H | -3.36668 | 1.070055 | 0.017315 |
| 1 | H | 2.857129 | -0.45    | -0.04418 |

|                   |   |          |          |                                     |   |   |          |                   |          |  |  |                                     |  |  |  |
|-------------------|---|----------|----------|-------------------------------------|---|---|----------|-------------------|----------|--|--|-------------------------------------|--|--|--|
| N3-Me-AD_3H       |   |          |          | E <sub>tot</sub> = -506.375091 a.u. |   |   |          | N1-Me-AD_1H       |          |  |  | E <sub>tot</sub> = -506.356916 a.u. |  |  |  |
| Gibbs free energy |   |          |          | E <sub>G</sub> = -506.274446 a.u.   |   |   |          | Gibbs free energy |          |  |  | E <sub>G</sub> = -506.254292 a.u.   |  |  |  |
| 7                 | N | 2.433879 | -0.03502 | -0.00038                            | 7 | N | 2.662128 | 0.234278          | 0.010102 |  |  |                                     |  |  |  |
| 6                 | C | 2.132468 | -1.32064 | -0.00034                            | 6 | C | 2.494049 | -1.15377          | 0.033182 |  |  |                                     |  |  |  |
| 7                 | N | 0.872358 | -1.84534 | -4.1E-05                            | 7 | N | 1.352484 | -1.78851          | 0.026004 |  |  |                                     |  |  |  |
| 6                 | C | -0.17634 | -0.95029 | 0.000148                            | 6 | C | 0.244131 | -0.98728          | -0.00241 |  |  |                                     |  |  |  |
| 6                 | C | 0.083123 | 0.451046 | 0.000169                            | 6 | C | 0.321675 | 0.454198          | -0.018   |  |  |                                     |  |  |  |
| 6                 | C | 1.419235 | 0.887757 | 4.86E-05                            | 6 | C | 1.564767 | 1.074732          | -0.00841 |  |  |                                     |  |  |  |
| 7                 | N | -1.12589 | 1.109401 | -0.0001                             | 7 | N | -0.94187 | 0.985295          | -0.02402 |  |  |                                     |  |  |  |
| 6                 | C | -2.00879 | 0.086039 | 0.00031                             | 6 | C | -1.7024  | -0.1405           | -0.01487 |  |  |                                     |  |  |  |
| 7                 | N | -1.49708 | -1.19853 | -1.5E-05                            | 7 | N | -1.05674 | -1.35255          | 0.000867 |  |  |                                     |  |  |  |
| 7                 | N | 1.766694 | 2.197921 | 0.001489                            | 7 | N | 1.739022 | 2.437828          | -0.09845 |  |  |                                     |  |  |  |
| 1                 | H | 2.742485 | 2.459345 | -0.00503                            | 1 | H | 2.513371 | 2.862052          | 0.400795 |  |  |                                     |  |  |  |
| 1                 | H | 1.042711 | 2.903242 | -0.00384                            | 1 | H | 0.859505 | 2.937655          | 0.008365 |  |  |                                     |  |  |  |
| 1                 | H | 2.946441 | -2.05004 | -0.0007                             | 1 | H | 3.432492 | -1.71321          | 0.059074 |  |  |                                     |  |  |  |
| 1                 | H | -3.08674 | 0.254249 | 0.000125                            | 1 | H | -2.79254 | -0.08601          | -0.01769 |  |  |                                     |  |  |  |
| 6                 | C | 0.612774 | -3.28982 | 5.17E-05                            | 6 | C | 4.014637 | 0.79914           | -0.00635 |  |  |                                     |  |  |  |
| 1                 | H | 0.029884 | -3.55391 | 0.89405                             | 1 | H | 4.126665 | 1.480111          | -0.86342 |  |  |                                     |  |  |  |
| 1                 | H | 0.027508 | -3.55348 | -0.8925                             | 1 | H | 4.224933 | 1.343454          | 0.929327 |  |  |                                     |  |  |  |
| 1                 | H | 1.572452 | -3.82277 | -0.00133                            | 1 | H | 4.735788 | -0.02087          | -0.10197 |  |  |                                     |  |  |  |
| N3-OMe-AD_3H      |   |          |          | E <sub>tot</sub> = -581.500654 a.u. |   |   |          | N1-OMe-AD_1H      |          |  |  | E <sub>tot</sub> = -581.487770 a.u. |  |  |  |
| Gibbs free energy |   |          |          | E <sub>G</sub> = -581.397613 a.u.   |   |   |          | Gibbs free energy |          |  |  | E <sub>G</sub> = -581.383897 a.u.   |  |  |  |
| 7                 | N | -2.67211 | -0.08031 | -0.10663                            | 7 | N | 2.560577 | 0.518413          | -0.11374 |  |  |                                     |  |  |  |
| 6                 | C | -2.3482  | -1.35395 | 0.029047                            | 6 | C | 2.560108 | -0.85331          | 0.117397 |  |  |                                     |  |  |  |
| 7                 | N | -1.07675 | -1.81068 | 0.198799                            | 7 | N | 1.474944 | -1.56455          | 0.274565 |  |  |                                     |  |  |  |
| 6                 | C | -0.03107 | -0.91541 | 0.237496                            | 6 | C | 0.301352 | -0.86291          | 0.190088 |  |  |                                     |  |  |  |
| 6                 | C | -0.33896 | 0.471363 | 0.079519                            | 6 | C | 0.236649 | 0.559261          | -0.07123 |  |  |                                     |  |  |  |
| 6                 | C | -1.68055 | 0.864214 | -0.08684                            | 6 | C | 1.416246 | 1.279827          | -0.23667 |  |  |                                     |  |  |  |
| 7                 | N | 0.840908 | 1.174803 | 0.14876                             | 7 | N | -1.0708  | 0.960587          | -0.12982 |  |  |                                     |  |  |  |
| 6                 | C | 1.752992 | 0.195308 | 0.331347                            | 6 | C | -1.71878 | -0.21225          | 0.100211 |  |  |                                     |  |  |  |
| 7                 | N | 1.288963 | -1.1062  | 0.393596                            | 7 | N | -0.95917 | -1.3377           | 0.296345 |  |  |                                     |  |  |  |
| 7                 | N | -2.04721 | 2.160154 | -0.24557                            | 7 | N | 1.521052 | 2.628317          | -0.43966 |  |  |                                     |  |  |  |
| 1                 | H | -3.02795 | 2.400177 | -0.28496                            | 1 | H | 2.339315 | 2.957343          | -0.94083 |  |  |                                     |  |  |  |
| 1                 | H | -1.34528 | 2.883596 | -0.16623                            | 1 | H | 0.638822 | 3.063554          | -0.69096 |  |  |                                     |  |  |  |
| 1                 | H | -3.11731 | -2.12793 | 0.024922                            | 1 | H | 3.557973 | -1.29519          | 0.143636 |  |  |                                     |  |  |  |
| 1                 | H | 2.818209 | 0.408162 | 0.428407                            | 1 | H | -2.80897 | -0.25864          | 0.12635  |  |  |                                     |  |  |  |
| 8                 | O | -0.90237 | -3.17445 | 0.43292                             | 8 | O | 3.791816 | 1.156387          | -0.28211 |  |  |                                     |  |  |  |
| 6                 | C | -0.15726 | -3.78749 | -0.6587                             | 6 | C | 4.291493 | 1.615728          | 1.008648 |  |  |                                     |  |  |  |
| 1                 | H | -0.70431 | -3.65551 | -1.60699                            | 1 | H | 5.238727 | 2.117999          | 0.770762 |  |  |                                     |  |  |  |
| 1                 | H | 0.852475 | -3.35657 | -0.71303                            | 1 | H | 3.579737 | 2.32123           | 1.464316 |  |  |                                     |  |  |  |
| 1                 | H | -0.11537 | -4.84953 | -0.38314                            | 1 | H | 4.466672 | 0.75491           | 1.672768 |  |  |                                     |  |  |  |

N3-OH-AD\_3H  $E_{\text{tot}} = -542.223954$  a.u.  
Gibbs free energy  $E_G = -542.14811$  a.u.

|   |   |          |          |          |
|---|---|----------|----------|----------|
| 7 | N | -2.78957 | 0.024269 | -0.00676 |
| 6 | C | -2.55563 | -1.28091 | -0.02666 |
| 7 | N | -1.30844 | -1.80994 | -0.03826 |
| 6 | C | -0.2217  | -0.98303 | -0.03004 |
| 6 | C | -0.41823 | 0.422508 | -0.00888 |
| 6 | C | -1.74437 | 0.906212 | 0.0025   |
| 7 | N | 0.827934 | 1.008972 | -0.00451 |
| 6 | C | 1.658971 | -0.05701 | -0.02236 |
| 7 | N | 1.077726 | -1.31427 | -0.03847 |
| 7 | N | -2.03989 | 2.229665 | 0.021921 |
| 1 | H | -3.0046  | 2.529321 | 0.030061 |
| 1 | H | -1.29045 | 2.907524 | 0.029646 |
| 1 | H | -3.37879 | -1.99658 | -0.03407 |
| 1 | H | 2.743342 | 0.054696 | -0.02401 |
| 8 | O | -1.13206 | -3.19383 | -0.05954 |
| 1 | H | -0.15251 | -3.27441 | -0.06358 |

N1-OH-AD\_1H  $E_{\text{tot}} = -542.206189$  a.u.  
Gibbs free energy  $E_G = -542.127644$  a.u.

|   |   |          |          |          |
|---|---|----------|----------|----------|
| 7 | N | 2.612927 | 0.298102 | 0.013935 |
| 6 | C | 2.521286 | -1.091   | -0.03545 |
| 7 | N | 1.389184 | -1.74226 | -0.02538 |
| 6 | C | 0.264625 | -0.96106 | 0.020835 |
| 6 | C | 0.296903 | 0.485398 | 0.044968 |
| 6 | C | 1.522705 | 1.145406 | 0.03073  |
| 7 | N | -0.98006 | 0.977437 | 0.061838 |
| 6 | C | -1.70688 | -0.17146 | 0.051098 |
| 7 | N | -1.02516 | -1.36192 | 0.024963 |
| 7 | N | 1.715699 | 2.496032 | 0.107975 |
| 1 | H | 2.559693 | 2.872702 | -0.30974 |
| 1 | H | 0.865603 | 3.031146 | -0.04153 |
| 1 | H | 3.48861  | -1.59406 | -0.08922 |
| 1 | H | -2.79801 | -0.14879 | 0.061289 |
| 8 | O | 3.887732 | 0.875445 | -0.07129 |
| 1 | H | 4.168377 | 1.001706 | 0.854884 |

N3-NH<sub>2</sub>-AD\_3H  $E_{\text{tot}} = -522.386047$  a.u.  
Gibbs free energy  $E_G = -522.295526$  a.u.

|   |   |          |          |          |
|---|---|----------|----------|----------|
| 7 | N | -0.89433 | -1.49178 | 0.83506  |
| 6 | C | 0.42147  | -1.59342 | 0.843451 |
| 7 | N | 1.264938 | -0.86687 | 0.054485 |
| 6 | C | 0.712729 | 0.044616 | -0.8203  |
| 6 | C | -0.70256 | 0.194426 | -0.86983 |
| 6 | C | -1.4932  | -0.5988  | -0.01816 |
| 7 | N | -0.99301 | 1.155839 | -1.81292 |
| 6 | C | 0.234357 | 1.507922 | -2.25321 |
| 7 | N | 1.324093 | 0.866354 | -1.68758 |
| 7 | N | -2.84562 | -0.52798 | 0.005911 |
| 1 | H | -3.36827 | -1.11708 | 0.638874 |
| 1 | H | -3.32073 | 0.120818 | -0.60664 |
| 1 | H | 0.918109 | -2.29691 | 1.513911 |
| 1 | H | 0.376109 | 2.266587 | -3.02385 |
| 7 | N | 2.664732 | -1.07788 | 0.166769 |
| 1 | H | 3.074207 | -0.15884 | 0.366481 |
| 1 | H | 2.992493 | -1.30954 | -0.7772  |

N1-NH<sub>2</sub>-AD\_1H  $E_{\text{tot}} = -522.369277$  a.u.  
Gibbs free energy  $E_G = -522.278009$  a.u.

|   |   |          |          |          |
|---|---|----------|----------|----------|
| 7 | N | 2.64099  | 0.32375  | -0.01331 |
| 6 | C | 2.52917  | -1.07    | -0.11784 |
| 7 | N | 1.407725 | -1.73309 | -0.15395 |
| 6 | C | 0.275914 | -0.96077 | -0.08247 |
| 6 | C | 0.302855 | 0.476917 | 0.020337 |
| 6 | C | 1.526447 | 1.145218 | 0.052974 |
| 7 | N | -0.97754 | 0.960641 | 0.077905 |
| 6 | C | -1.69995 | -0.18856 | 0.007666 |
| 7 | N | -1.0119  | -1.37165 | -0.09045 |
| 7 | N | 1.686737 | 2.489665 | 0.10423  |
| 1 | H | 2.603647 | 2.86803  | 0.304212 |
| 1 | H | 0.854602 | 3.033472 | 0.295713 |
| 1 | H | 3.494024 | -1.58337 | -0.16497 |
| 1 | H | -2.79108 | -0.17257 | 0.029008 |
| 7 | N | 3.90802  | 0.953791 | 0.049412 |
| 1 | H | 4.442643 | 0.527946 | 0.809108 |
| 1 | H | 4.403617 | 0.778963 | -0.82769 |

**Table S15.** Values of total energies and Gibbs free energies, cartesian coordinates of equilibrium geometries of C8-X and C2-X substituted purine (PU) 9H, 7H, 3H and 1H tautomers.

| C8-NO <sub>2</sub> -PU_9H           |   |          |          |          | C2-NO <sub>2</sub> -PU_9H           |   |          |          |          |
|-------------------------------------|---|----------|----------|----------|-------------------------------------|---|----------|----------|----------|
| E <sub>tot</sub> = -616.168587 a.u. |   |          |          |          | E <sub>tot</sub> = -616.169698 a.u. |   |          |          |          |
| Gibbs free energy                   |   |          |          |          | Gibbs free energy                   |   |          |          |          |
| E <sub>G</sub> = -616.108778 a.u.   |   |          |          |          | E <sub>G</sub> = -616.108863 a.u.   |   |          |          |          |
| 7                                   | N | -3.21234 | 0.665164 | 0.000032 | 7                                   | N | -0.77871 | 1.400018 | -0.00011 |
| 6                                   | C | -3.09987 | -0.68752 | 0.000431 | 6                                   | C | -1.05727 | 0.095056 | -9.3E-05 |
| 7                                   | N | -1.97707 | -1.43298 | 0.000239 | 7                                   | N | -0.2431  | -0.96291 | -8E-06   |
| 6                                   | C | -0.87638 | -0.6769  | 0.000192 | 6                                   | C | 1.035035 | -0.58335 | 0.000125 |
| 6                                   | C | -0.83899 | 0.751088 | 0.000089 | 6                                   | C | 1.511644 | 0.762079 | 0.000166 |
| 6                                   | C | -2.0872  | 1.396861 | -8.9E-05 | 6                                   | C | 0.520509 | 1.754883 | -6E-06   |
| 7                                   | N | 0.472261 | 1.210068 | 0.00031  | 7                                   | N | 2.901634 | 0.785829 | 0.000547 |
| 6                                   | C | 1.180865 | 0.102093 | -0.00005 | 6                                   | C | 3.251993 | -0.48944 | 0.000097 |
| 7                                   | N | 0.447624 | -1.06877 | 0.000045 | 7                                   | N | 2.173086 | -1.36453 | 0.00023  |
| 1                                   | H | -4.04243 | -1.24295 | -0.00019 | 1                                   | H | 2.200888 | -2.37792 | 0.000512 |
| 1                                   | H | 0.836168 | -2.00608 | 0.000203 | 1                                   | H | 0.754512 | 2.824021 | 0.000135 |
| 1                                   | H | -2.18138 | 2.487997 | -9.3E-05 | 1                                   | H | 4.27696  | -0.85636 | 0.00012  |
| 7                                   | N | 2.64252  | 0.027359 | -0.00025 | 7                                   | N | -2.54562 | -0.2517  | -0.00031 |
| 8                                   | O | 3.11465  | -1.12157 | -0.00031 | 8                                   | O | -2.83395 | -1.44614 | 0.000405 |
| 8                                   | O | 3.273602 | 1.07674  | -0.00044 | 8                                   | O | -3.33541 | 0.687129 | -0.00103 |

  

| C8-CN-PU_9H                         |   |          |          |          | C2-CN-PU_9H                         |   |          |          |          |
|-------------------------------------|---|----------|----------|----------|-------------------------------------|---|----------|----------|----------|
| E <sub>tot</sub> = -503.927175 a.u. |   |          |          |          | E <sub>tot</sub> = -503.928272 a.u. |   |          |          |          |
| Gibbs free energy                   |   |          |          |          | Gibbs free energy                   |   |          |          |          |
| E <sub>G</sub> = -503.86959 a.u.    |   |          |          |          | E <sub>G</sub> = -503.870719 a.u.   |   |          |          |          |
| 7                                   | N | -2.84737 | 0.654904 | -1E-06   | 7                                   | N | -1.15942 | 1.351228 | -0.00021 |
| 6                                   | C | -2.73288 | -0.69601 | 0.000342 | 6                                   | C | -1.44397 | 0.025322 | -0.00045 |
| 7                                   | N | -1.60678 | -1.43792 | 0.000208 | 7                                   | N | -0.58349 | -1.01995 | -0.00022 |
| 6                                   | C | -0.50826 | -0.67817 | 0.000136 | 6                                   | C | 0.684989 | -0.6142  | -3E-06   |
| 6                                   | C | -0.47233 | 0.74656  | 0.000039 | 6                                   | C | 1.138827 | 0.737907 | 0.000105 |
| 6                                   | C | -1.72215 | 1.388475 | -0.00011 | 6                                   | C | 0.134012 | 1.716294 | 0.000025 |
| 7                                   | N | 0.835442 | 1.208886 | 0.000313 | 7                                   | N | 2.528666 | 0.786696 | 0.000238 |
| 6                                   | C | 1.572081 | 0.101683 | -0.00029 | 6                                   | C | 2.901728 | -0.48179 | 0.000431 |
| 7                                   | N | 0.813518 | -1.07079 | 0.000063 | 7                                   | N | 1.83765  | -1.37532 | 0.000115 |
| 1                                   | H | -3.6734  | -1.25492 | -0.00013 | 1                                   | H | 1.883573 | -2.38794 | 0.000307 |
| 1                                   | H | 1.165045 | -2.02216 | 0.000484 | 1                                   | H | 0.35734  | 2.788048 | 0.000063 |
| 1                                   | H | -1.81927 | 2.479371 | -0.0001  | 1                                   | H | 3.932967 | -0.83126 | 0.000586 |
| 6                                   | C | 2.996748 | 0.054507 | -0.0004  | 6                                   | C | -2.85155 | -0.3164  | -0.00019 |
| 7                                   | N | 4.16638  | -0.02716 | -0.00038 | 7                                   | N | -3.98885 | -0.59574 | 0.000008 |

|                                                     |    |          |          |          |                                                     |    |          |          |          |
|-----------------------------------------------------|----|----------|----------|----------|-----------------------------------------------------|----|----------|----------|----------|
| C8-CHO-PU_9H $E_{\text{tot}} = -525.019300$ a.u.    |    |          |          |          | C2-CHO-PU_9H $E_{\text{tot}} = -525.012356$ a.u.    |    |          |          |          |
| Gibbs free energy $E_{\text{G}} = -524.951194$ a.u. |    |          |          |          | Gibbs free energy $E_{\text{G}} = -524.944891$ a.u. |    |          |          |          |
| 7                                                   | N  | -2.95537 | 0.495729 | 0.000129 | 7                                                   | N  | 0.996012 | 1.511681 | 0.000007 |
| 6                                                   | C  | -2.72403 | -0.84238 | 0.000165 | 6                                                   | C  | 1.394739 | 0.212853 | 0.000008 |
| 7                                                   | N  | -1.54149 | -1.48716 | 0.000132 | 7                                                   | N  | 0.611533 | -0.89063 | 0.000007 |
| 6                                                   | C  | -0.50713 | -0.63933 | 0.000047 | 6                                                   | C  | -0.68106 | -0.58563 | 0.000001 |
| 6                                                   | C  | -0.59515 | 0.78785  | -5E-06   | 6                                                   | C  | -1.24452 | 0.727092 | -1E-06   |
| 6                                                   | C  | -1.89633 | 1.320591 | 0.000029 | 6                                                   | C  | -0.32019 | 1.781704 | -5.3E-05 |
| 7                                                   | N  | 0.667682 | 1.353881 | -8.9E-05 | 7                                                   | N  | -2.63364 | 0.663992 | 0.000234 |
| 6                                                   | C  | 1.498639 | 0.310168 | -0.00012 | 6                                                   | C  | -2.9028  | -0.63159 | -0.0003  |
| 7                                                   | N  | 0.839811 | -0.9138  | 0.000004 | 7                                                   | N  | -1.77275 | -1.43639 | 0.000118 |
| 1                                                   | H  | -3.6149  | -1.47778 | 0.000271 | 1                                                   | H  | -1.7371  | -2.44936 | -0.00001 |
| 1                                                   | H  | 1.292682 | -1.82196 | 0.000126 | 1                                                   | H  | -0.62874 | 2.832534 | 0.000076 |
| 1                                                   | H  | -2.08569 | 2.399624 | -3E-06   | 1                                                   | H  | -3.90352 | -1.06143 | -0.00037 |
| 6                                                   | C  | 2.966847 | 0.401155 | -0.00019 | 6                                                   | C  | 2.887993 | 0.024921 | -0.00017 |
| 8                                                   | O  | 3.689421 | -0.58903 | -0.00011 | 8                                                   | O  | 3.451561 | -1.0542  | 0.000094 |
| 1                                                   | H  | 3.361121 | 1.443433 | -0.0003  | 1                                                   | H  | 3.443726 | 0.995177 | -0.00039 |
|                                                     |    |          |          |          |                                                     |    |          |          |          |
| C8-CHO-PU_9H $E_{\text{tot}} = -525.009688$ a.u.    |    |          |          |          | C2-CHO-PU_9H $E_{\text{tot}} = -525.011257$ a.u.    |    |          |          |          |
| Gibbs free energy $E_{\text{G}} = -524.94224$ a.u.  |    |          |          |          | Gibbs free energy $E_{\text{G}} = -524.94385$ a.u.  |    |          |          |          |
| 7                                                   | N  | 2.852408 | 0.823963 | -4.5E-05 | 7                                                   | N  | -1.17705 | 1.189913 | 0.000049 |
| 6                                                   | C  | 2.858304 | -0.53441 | 0.000139 | 6                                                   | C  | -1.36426 | -0.15223 | 0.000121 |
| 7                                                   | N  | 1.805447 | -1.37398 | 0.000027 | 7                                                   | N  | -0.41313 | -1.12061 | 0.000085 |
| 6                                                   | C  | 0.640616 | -0.71582 | 0.000021 | 6                                                   | C  | 0.819633 | -0.61971 | 0.000033 |
| 6                                                   | C  | 0.476799 | 0.702668 | -0.00002 | 6                                                   | C  | 1.163147 | 0.763449 | -6E-06   |
| 6                                                   | C  | 1.667294 | 1.453256 | -0.00013 | 6                                                   | C  | 0.079273 | 1.657916 | 0.000012 |
| 7                                                   | N  | -0.86196 | 1.044001 | 0.000164 | 7                                                   | N  | 2.543981 | 0.925254 | -0.00008 |
| 6                                                   | C  | -1.50792 | -0.11952 | -0.00019 | 6                                                   | C  | 3.019611 | -0.30958 | 0.000051 |
| 7                                                   | N  | -0.63815 | -1.21911 | 0.000095 | 7                                                   | N  | 2.032898 | -1.28556 | -0.00011 |
| 7                                                   | H  | 3.846157 | -1.00501 | -0.00018 | 1                                                   | H  | 2.162148 | -2.29073 | 0.000023 |
| 1                                                   | H  | -0.89217 | -2.20108 | -5.2E-05 | 1                                                   | H  | 0.219943 | 2.744411 | -5.4E-05 |
| 1                                                   | H  | 1.666127 | 2.548675 | -4.4E-05 | 1                                                   | H  | 4.076177 | -0.57302 | 0.000031 |
| 6                                                   | C  | -2.97199 | -0.33404 | -0.00024 | 6                                                   | C  | -2.77296 | -0.68318 | 0.000093 |
| 8                                                   | O  | -3.8042  | 0.554751 | 0.00017  | 8                                                   | O  | -3.77783 | 0.002306 | -0.00013 |
| 1                                                   | H  | -3.26945 | -1.41754 | -0.00026 | 1                                                   | H  | -2.80915 | -1.80211 | -0.00034 |
|                                                     |    |          |          |          |                                                     |    |          |          |          |
| C8-Cl-PU_9H $E_{\text{tot}} = -871.372525$ a.u.     |    |          |          |          | C2-Cl-PU_9H $E_{\text{tot}} = -871.375960$ a.u.     |    |          |          |          |
| Gibbs free energy $E_{\text{G}} = -871.321934$ a.u. |    |          |          |          | Gibbs free energy $E_{\text{G}} = -871.325514$ a.u. |    |          |          |          |
| 7                                                   | N  | -2.9564  | 0.662746 | 0.000026 | 7                                                   | N  | -1.06265 | 1.345126 | 0.000155 |
| 6                                                   | C  | -2.85072 | -0.68453 | -0.00016 | 6                                                   | C  | -1.32641 | 0.0283   | 0.000745 |
| 7                                                   | N  | -1.7248  | -1.43232 | -0.00003 | 7                                                   | N  | -0.4776  | -1.00924 | 0.00041  |
| 6                                                   | C  | -0.62593 | -0.6783  | -4.3E-05 | 6                                                   | C  | 0.794294 | -0.59892 | 0.000268 |
| 6                                                   | C  | -0.58024 | 0.744395 | -0.00004 | 6                                                   | C  | 1.242963 | 0.752134 | 0.000145 |
| 6                                                   | C  | -1.82229 | 1.390895 | 0.000039 | 6                                                   | C  | 0.231568 | 1.720825 | -5.3E-05 |
| 7                                                   | N  | 0.742719 | 1.197608 | -0.00026 | 7                                                   | N  | 2.636168 | 0.80477  | 0.000237 |
| 6                                                   | C  | 1.450794 | 0.092886 | 0.000107 | 6                                                   | C  | 3.01219  | -0.46034 | 0.000057 |
| 7                                                   | N  | 0.702847 | -1.07678 | -8.3E-05 | 7                                                   | N  | 1.946758 | -1.35772 | 0.000168 |
| 1                                                   | H  | -3.79307 | -1.24052 | 0.000355 | 1                                                   | H  | 1.994174 | -2.36995 | 0.00043  |
| 1                                                   | H  | 1.059307 | -2.02521 | 0.000484 | 1                                                   | H  | 0.441966 | 2.795162 | -0.00019 |
| 1                                                   | H  | -1.91439 | 2.482211 | -5.9E-05 | 1                                                   | H  | 4.043406 | -0.80945 | -1.3E-05 |
| 17                                                  | Cl | 3.1687   | 0.0078   | 0.000131 | 17                                                  | Cl | -3.02976 | -0.39696 | -0.00082 |

|                                                     |   |          |          |          |                                                     |   |          |          |          |
|-----------------------------------------------------|---|----------|----------|----------|-----------------------------------------------------|---|----------|----------|----------|
| C8-F-PU_9H $E_{\text{tot}} = -510.943647$ a.u.      |   |          |          |          | C2-F-PU_9H $E_{\text{tot}} = -510.953511$ a.u.      |   |          |          |          |
| Gibbs free energy $E_{\text{G}} = -510.890557$ a.u. |   |          |          |          | Gibbs free energy $E_{\text{G}} = -510.900289$ a.u. |   |          |          |          |
| 7                                                   | N | -2.54161 | 0.661651 | 0.000001 | 7                                                   | N | -1.57944 | 1.142159 | -0.00014 |
| 6                                                   | C | -2.43692 | -0.68408 | -0.00017 | 6                                                   | C | -1.70193 | -0.18896 | -8.7E-05 |
| 7                                                   | N | -1.30939 | -1.43157 | -2.5E-05 | 7                                                   | N | -0.77368 | -1.14668 | 0.000026 |
| 6                                                   | C | -0.21272 | -0.67821 | -2.2E-05 | 6                                                   | C | 0.455979 | -0.61875 | 0.000054 |
| 6                                                   | C | -0.16538 | 0.744952 | -1.4E-05 | 6                                                   | C | 0.772276 | 0.769349 | -1.2E-05 |
| 6                                                   | C | -1.40627 | 1.390228 | 0.000042 | 6                                                   | C | -0.32563 | 1.638699 | -0.00012 |
| 7                                                   | N | 1.161569 | 1.198929 | -0.00019 | 7                                                   | N | 2.155262 | 0.954766 | 0.000149 |
| 6                                                   | C | 1.850667 | 0.093303 | 0.000113 | 6                                                   | C | 2.650683 | -0.2673  | -2.3E-05 |
| 7                                                   | N | 1.120378 | -1.07982 | -4.7E-05 | 7                                                   | N | 1.67439  | -1.26324 | 0.000101 |
| 1                                                   | H | -3.37872 | -1.24089 | 0.000281 | 1                                                   | H | 1.818377 | -2.26625 | 0.000405 |
| 1                                                   | H | 1.47934  | -2.0274  | 0.000564 | 1                                                   | H | -0.21602 | 2.72778  | -0.00013 |
| 1                                                   | H | -1.49882 | 2.481461 | -4.9E-05 | 1                                                   | H | 3.710467 | -0.51716 | -0.00004 |
| 9                                                   | F | 3.178369 | 0.016139 | 0.000142 | 9                                                   | F | -2.97298 | -0.63907 | -7E-06   |
| C8-H-PU_9H $E_{\text{tot}} = -411.741198$ a.u.      |   |          |          |          | C2-H-PU_9H $E_{\text{tot}} = -411.741198$ a.u.      |   |          |          |          |
| Gibbs free energy $E_{\text{G}} = -411.678769$ a.u. |   |          |          |          | Gibbs free energy $E_{\text{G}} = -411.678769$ a.u. |   |          |          |          |
| 7                                                   | N | 2.133176 | 0.656495 | 0.000257 | 7                                                   | N | 2.133176 | 0.656495 | 0.000257 |
| 6                                                   | C | 2.020379 | -0.69113 | 0.000211 | 6                                                   | C | 2.020379 | -0.69113 | 0.000211 |
| 7                                                   | N | 0.89314  | -1.43447 | 0.000044 | 7                                                   | N | 0.89314  | -1.43447 | 0.000044 |
| 6                                                   | C | -0.20576 | -0.67547 | -4.3E-05 | 6                                                   | C | -0.20576 | -0.67547 | -4.3E-05 |
| 6                                                   | C | -0.24493 | 0.747737 | 0.000004 | 6                                                   | C | -0.24493 | 0.747737 | 0.000004 |
| 6                                                   | C | 1.001414 | 1.387556 | 0.000157 | 6                                                   | C | 1.001414 | 1.387556 | 0.000157 |
| 7                                                   | N | -1.56412 | 1.203032 | -9.8E-05 | 7                                                   | N | -1.56412 | 1.203032 | -9.8E-05 |
| 6                                                   | C | -2.29031 | 0.100127 | -0.0002  | 6                                                   | C | -2.29031 | 0.100127 | -0.0002  |
| 7                                                   | N | -1.53258 | -1.06594 | -0.00028 | 7                                                   | N | -1.53258 | -1.06594 | -0.00028 |
| 1                                                   | H | 1.099483 | 2.478907 | 0.000216 | 1                                                   | H | 1.099483 | 2.478907 | 0.000216 |
| 1                                                   | H | -3.37889 | 0.065738 | -0.00032 | 1                                                   | H | -3.37889 | 0.065738 | -0.00032 |
| 1                                                   | H | 2.960683 | -1.25118 | 0.000252 | 1                                                   | H | 2.960683 | -1.25118 | 0.000252 |
| 1                                                   | H | -1.87332 | -2.02021 | -0.00041 | 1                                                   | H | -1.87332 | -2.02021 | -0.00041 |
| C8-Me-PU_9H $E_{\text{tot}} = -451.043994$ a.u.     |   |          |          |          | C2-Me-PU_9H $E_{\text{tot}} = -451.041421$ a.u.     |   |          |          |          |
| Gibbs free energy $E_{\text{G}} = -450.957287$ a.u. |   |          |          |          | Gibbs free energy $E_{\text{G}} = -450.95599$ a.u.  |   |          |          |          |
| 7                                                   | N | 2.586578 | 0.669494 | -0.00031 | 7                                                   | N | 1.501101 | 1.193626 | 0.000014 |
| 6                                                   | C | 2.48465  | -0.67772 | 0.000005 | 6                                                   | C | 1.709726 | -0.1518  | 0.000021 |
| 7                                                   | N | 1.360823 | -1.42888 | -5.6E-05 | 7                                                   | N | 0.755725 | -1.11289 | 0.00002  |
| 6                                                   | C | 0.257082 | -0.67899 | 0.000052 | 6                                                   | C | -0.4826  | -0.6139  | 0.000006 |
| 6                                                   | C | 0.206609 | 0.743328 | 0.000009 | 6                                                   | C | -0.838   | 0.761681 | 0.000002 |
| 6                                                   | C | 1.44716  | 1.391772 | -0.00024 | 6                                                   | C | 0.240404 | 1.656825 | 0.000009 |
| 7                                                   | N | -1.11641 | 1.18448  | 0.000493 | 7                                                   | N | -2.2255  | 0.912782 | -1.6E-05 |
| 6                                                   | C | -1.84841 | 0.079977 | -1.6E-05 | 6                                                   | C | -2.68894 | -0.32362 | -9E-06   |
| 7                                                   | N | -1.06677 | -1.07812 | 0.00014  | 7                                                   | N | -1.68882 | -1.29108 | -1.1E-05 |
| 1                                                   | H | 3.428843 | -1.23112 | -0.00077 | 1                                                   | H | -1.80631 | -2.29733 | 0.000084 |
| 1                                                   | H | -1.3966  | -2.03604 | -0.00036 | 1                                                   | H | 0.097707 | 2.743341 | -7E-06   |
| 1                                                   | H | 1.536806 | 2.483653 | -0.00014 | 1                                                   | H | -3.74231 | -0.59971 | -2.3E-05 |
| 6                                                   | C | -3.33922 | 0.026244 | 0.000051 | 6                                                   | C | 3.145628 | -0.6045  | -2.3E-05 |
| 1                                                   | H | -3.71821 | -0.50229 | -0.89159 | 1                                                   | H | 3.66708  | -0.20529 | 0.885218 |
| 1                                                   | H | -3.7181  | -0.50265 | 0.891521 | 1                                                   | H | 3.202129 | -1.70046 | 0.000281 |
| 1                                                   | H | -3.72954 | 1.051921 | 0.000275 | 1                                                   | H | 3.666852 | -0.20583 | -0.88564 |

|                                                     |   |          |          |          |                                                     |   |          |          |          |
|-----------------------------------------------------|---|----------|----------|----------|-----------------------------------------------------|---|----------|----------|----------|
| C8-OMe- PU_9H $E_{\text{tot}} = -526.215871$ a.u.   |   |          |          |          | C2-OMe- PU_9H $E_{\text{tot}} = -526.226856$ a.u.   |   |          |          |          |
| Gibbs free energy $E_{\text{G}} = -526.126105$ a.u. |   |          |          |          | Gibbs free energy $E_{\text{G}} = -526.136473$ a.u. |   |          |          |          |
| 7                                                   | N | 3.041032 | 0.41492  | -0.00032 | 7                                                   | N | 1.168668 | 1.068913 | -6.5E-05 |
| 6                                                   | C | 2.767354 | -0.90512 | -0.0003  | 6                                                   | C | 1.275745 | -0.2798  | -0.00012 |
| 7                                                   | N | 1.551127 | -1.50177 | -0.00017 | 7                                                   | N | 0.284448 | -1.19685 | -3.6E-05 |
| 6                                                   | C | 0.561001 | -0.61391 | -0.00006 | 6                                                   | C | -0.91758 | -0.62342 | 0.000004 |
| 6                                                   | C | 0.690752 | 0.803172 | -9.3E-05 | 6                                                   | C | -1.19279 | 0.774687 | -6E-06   |
| 6                                                   | C | 2.005484 | 1.282605 | -0.00023 | 6                                                   | C | -0.06747 | 1.603708 | -2.4E-05 |
| 7                                                   | N | -0.56164 | 1.417619 | 0.000011 | 7                                                   | N | -2.57101 | 1.00516  | 0.000061 |
| 6                                                   | C | -1.41414 | 0.41293  | 0.000099 | 6                                                   | C | -3.10471 | -0.20005 | -2.1E-05 |
| 7                                                   | N | -0.81005 | -0.84747 | 0.000187 | 7                                                   | N | -2.16023 | -1.22712 | 0.000087 |
| 1                                                   | H | 3.629598 | -1.57872 | -0.0004  | 1                                                   | H | -2.33601 | -2.22472 | -0.00017 |
| 1                                                   | H | -1.24985 | -1.75859 | -0.00035 | 1                                                   | H | -0.14269 | 2.696396 | 0.000012 |
| 1                                                   | H | 2.237825 | 2.352865 | -0.00024 | 1                                                   | H | -4.17195 | -0.4161  | 0        |
| 8                                                   | O | -2.74274 | 0.595497 | 0.000239 | 8                                                   | O | 2.511448 | -0.82765 | -0.00001 |
| 6                                                   | C | -3.57752 | -0.57874 | 0.000491 | 6                                                   | C | 3.632839 | 0.082009 | 0.000094 |
| 1                                                   | H | -4.60733 | -0.20347 | 0.000716 | 1                                                   | H | 4.517229 | -0.56786 | 0.000195 |
| 1                                                   | H | -3.40481 | -1.18244 | -0.90731 | 1                                                   | H | 3.616295 | 0.719944 | -0.89652 |
| 1                                                   | H | -3.40436 | -1.18237 | 0.908252 | 1                                                   | H | 3.616113 | 0.719975 | 0.896681 |
|                                                     |   |          |          |          |                                                     |   |          |          |          |
| C8-OMe- PU_9H $E_{\text{tot}} = -526.224915$ a.u.   |   |          |          |          | C2-OMe- PU_9H $E_{\text{tot}} = -526.226415$ a.u.   |   |          |          |          |
| Gibbs free energy $E_{\text{G}} = -526.134812$ a.u. |   |          |          |          | Gibbs free energy $E_{\text{G}} = -526.135919$ a.u. |   |          |          |          |
| 7                                                   | N | -2.86968 | 0.912592 | 0.000064 | 7                                                   | N | 0.872466 | 1.628833 | 0.000001 |
| 6                                                   | C | -2.94804 | -0.4322  | 0.000287 | 6                                                   | C | 1.333519 | 0.353883 | 0.000077 |
| 7                                                   | N | -1.92971 | -1.32642 | 0.000154 | 7                                                   | N | 0.623972 | -0.79271 | 0.000094 |
| 6                                                   | C | -0.74071 | -0.73074 | 0.000052 | 6                                                   | C | -0.69405 | -0.56333 | -8.3E-05 |
| 6                                                   | C | -0.50013 | 0.67421  | -2.9E-05 | 6                                                   | C | -1.32554 | 0.707604 | -0.00024 |
| 6                                                   | C | -1.6418  | 1.479295 | -6.9E-05 | 6                                                   | C | -0.45574 | 1.809613 | -0.00017 |
| 7                                                   | N | 0.873437 | 0.940904 | -4E-06   | 7                                                   | N | -2.71492 | 0.567124 | -0.00038 |
| 6                                                   | C | 1.427273 | -0.25722 | -0.00012 | 6                                                   | C | -2.91401 | -0.7363  | -0.00043 |
| 7                                                   | N | 0.521473 | -1.31044 | -0.00013 | 7                                                   | N | -1.73013 | -1.47584 | -0.00012 |
| 1                                                   | H | -3.95592 | -0.85846 | 0.000077 | 1                                                   | H | -1.63686 | -2.48443 | -0.00029 |
| 1                                                   | H | 0.74228  | -2.29874 | 0.000327 | 1                                                   | H | -0.82233 | 2.842041 | -0.00024 |
| 1                                                   | H | -1.58693 | 2.57328  | -0.00012 | 1                                                   | H | -3.88586 | -1.22703 | -0.00053 |
| 8                                                   | O | 2.728439 | -0.55702 | -0.00014 | 8                                                   | O | 2.683112 | 0.280653 | 0.000385 |
| 6                                                   | C | 3.618428 | 0.59254  | -6.2E-05 | 6                                                   | C | 3.264953 | -1.03855 | 0.000634 |
| 1                                                   | H | 4.627738 | 0.165268 | -5.8E-05 | 1                                                   | H | 4.34868  | -0.86755 | 0.000862 |
| 6                                                   | H | 3.44324  | 1.201568 | -0.89887 | 1                                                   | H | 2.958295 | -1.59875 | 0.897695 |
| 1                                                   | H | 3.443196 | 1.201483 | 0.898792 | 1                                                   | H | 2.958697 | -1.5989  | -0.89647 |



|                                                                |   |          |          |          |                                                                |   |          |          |          |
|----------------------------------------------------------------|---|----------|----------|----------|----------------------------------------------------------------|---|----------|----------|----------|
| C8-OH- PU_9H $E_{\text{tot}} = -486.938320$ a.u.               |   |          |          |          | C2-OH- PU_9H $E_{\text{tot}} = -486.953186$ a.u.               |   |          |          |          |
| Gibbs free energy $E_{\text{G}} = -486.874055$ a.u             |   |          |          |          | Gibbs free energy $E_{\text{G}} = -486.887437$ a.u             |   |          |          |          |
| 7                                                              | N | 2.556834 | 0.652548 | 0.000001 | 7                                                              | N | 1.5719   | 1.124812 | 0.000317 |
| 6                                                              | C | 2.448037 | -0.69047 | -0.00034 | 6                                                              | C | 1.708047 | -0.2241  | 0.000646 |
| 7                                                              | N | 1.314215 | -1.43286 | -0.00013 | 7                                                              | N | 0.749558 | -1.1652  | 0.000287 |
| 6                                                              | C | 0.222506 | -0.67438 | -4.2E-05 | 6                                                              | C | -0.4697  | -0.62033 | 0.000015 |
| 6                                                              | C | 0.177412 | 0.747923 | 0.00003  | 6                                                              | C | -0.77877 | 0.769144 | -5.5E-05 |
| 6                                                              | C | 1.421781 | 1.385941 | 0.000135 | 6                                                              | C | 0.325084 | 1.629853 | 0.000072 |
| 7                                                              | N | -1.14321 | 1.204335 | -0.00012 | 7                                                              | N | -2.16144 | 0.965362 | -0.00026 |
| 6                                                              | C | -1.86154 | 0.105471 | 0.000092 | 6                                                              | C | -2.66581 | -0.25257 | -0.00044 |
| 7                                                              | N | -1.1112  | -1.07242 | 0.000188 | 7                                                              | N | -1.69488 | -1.25505 | -0.00024 |
| 1                                                              | H | 3.386456 | -1.25309 | 0.000137 | 1                                                              | H | -1.8448  | -2.25699 | -0.00053 |
| 1                                                              | H | -1.43955 | -2.03111 | -0.00044 | 1                                                              | H | 0.222217 | 2.719926 | 0        |
| 1                                                              | H | 1.520011 | 2.476661 | 0.000157 | 1                                                              | H | -3.72708 | -0.49541 | -0.00063 |
| 8                                                              | O | -3.20981 | 0.1117   | 0.00009  | 8                                                              | O | 2.978844 | -0.69523 | -8.6E-05 |
| 1                                                              | H | -3.55413 | -0.79418 | 0.000582 | 1                                                              | H | 3.549791 | 0.092881 | -0.00039 |
|                                                                |   |          |          |          |                                                                |   |          |          |          |
| C8-OH- PU_9H $E_{\text{tot}} = -486.948145$ a.u.               |   |          |          |          | C2-OH- PU_9H $E_{\text{tot}} = -486.951744$ a.u.               |   |          |          |          |
| Gibbs free energy $E_{\text{G}} = -486.88269$ a.u              |   |          |          |          | Gibbs free energy $E_{\text{G}} = -486.88609$ a.u              |   |          |          |          |
| 7                                                              | N | -2.54592 | 0.681927 | 0.000005 | 7                                                              | N | 1.557025 | 1.185213 | 0.000152 |
| 6                                                              | C | -2.4566  | -0.66242 | 0.000187 | 6                                                              | C | 1.723573 | -0.15349 | 0.000351 |
| 7                                                              | N | -1.33427 | -1.42171 | 0.000108 | 7                                                              | N | 0.783402 | -1.12223 | 0.000195 |
| 6                                                              | C | -0.22992 | -0.68212 | 0.000033 | 6                                                              | C | -0.45352 | -0.61545 | 0.000019 |
| 6                                                              | C | -0.16568 | 0.741396 | -4.5E-05 | 6                                                              | C | -0.79016 | 0.765769 | -0.00008 |
| 6                                                              | C | -1.39951 | 1.397867 | -0.0001  | 6                                                              | C | 0.296236 | 1.650934 | -1.7E-05 |
| 7                                                              | N | 1.165611 | 1.17337  | -3.8E-05 | 7                                                              | N | -2.17706 | 0.93219  | -0.00024 |
| 6                                                              | C | 1.858696 | 0.053357 | -6.1E-05 | 6                                                              | C | -2.65639 | -0.29529 | -0.00025 |
| 7                                                              | N | 1.097047 | -1.10153 | -7.2E-05 | 7                                                              | N | -1.66361 | -1.27771 | -8.4E-05 |
| 1                                                              | H | -3.40334 | -1.21098 | 0.000062 | 1                                                              | H | -1.79427 | -2.28217 | -0.00036 |
| 1                                                              | H | 1.438809 | -2.05497 | 0.000415 | 1                                                              | H | 0.163626 | 2.738145 | -0.0001  |
| 1                                                              | H | -1.482   | 2.489994 | -0.00016 | 1                                                              | H | -3.71213 | -0.56114 | -0.00033 |
| 8                                                              | O | 3.197102 | -0.06042 | -5.2E-05 | 8                                                              | O | 3.01653  | -0.56217 | 0.000062 |
| 1                                                              | H | 3.550537 | 0.846452 | -1.3E-05 | 1                                                              | H | 2.993732 | -1.53456 | -3.7E-05 |
|                                                                |   |          |          |          |                                                                |   |          |          |          |
| C8-NH <sub>2</sub> - PU_9H $E_{\text{tot}} = -467.086682$ a.u. |   |          |          |          | C2-NH <sub>2</sub> - PU_9H $E_{\text{tot}} = -467.093074$ a.u. |   |          |          |          |
| Gibbs free energy $E_{\text{G}} = -467.009632$ a.u             |   |          |          |          | Gibbs free energy $E_{\text{G}} = -467.016016$ a.u             |   |          |          |          |
| 7                                                              | N | -2.5647  | 0.671329 | 0.003387 | 7                                                              | N | 1.54184  | 1.176136 | 0.00488  |
| 6                                                              | C | -2.4689  | -0.67129 | 0.000119 | 6                                                              | C | 1.717681 | -0.17729 | -0.00287 |
| 7                                                              | N | -1.34113 | -1.42528 | 0.000245 | 7                                                              | N | 0.759091 | -1.13752 | 0.004223 |
| 6                                                              | C | -0.24124 | -0.67898 | -0.00105 | 6                                                              | C | -0.4694  | -0.6174  | -0.00073 |
| 6                                                              | C | -0.18249 | 0.744548 | -0.00091 | 6                                                              | C | -0.80438 | 0.764518 | -0.00411 |
| 6                                                              | C | -1.42076 | 1.393514 | 0.003496 | 6                                                              | C | 0.285626 | 1.645634 | 0.003742 |
| 7                                                              | N | 1.141784 | 1.183367 | 0.007028 | 7                                                              | N | -2.19101 | 0.936357 | -0.0026  |
| 6                                                              | C | 1.858892 | 0.069586 | 0.000442 | 6                                                              | C | -2.67479 | -0.28956 | 0.000545 |
| 7                                                              | N | 1.08603  | -1.09103 | 0.0028   | 7                                                              | N | -1.68436 | -1.27473 | 0.003782 |
| 1                                                              | H | -3.41215 | -1.22594 | -0.00337 | 1                                                              | H | -1.81706 | -2.27877 | 0.002638 |
| 1                                                              | H | 1.409753 | -2.04766 | -0.07306 | 1                                                              | H | 0.155556 | 2.733523 | 0.013831 |
| 1                                                              | H | -1.50978 | 2.485132 | 0.00697  | 1                                                              | H | -3.73146 | -0.55191 | 0.001158 |
| 7                                                              | N | 3.233981 | 0.013406 | -0.07985 | 7                                                              | N | 3.022212 | -0.60817 | -0.0601  |
| 1                                                              | H | 3.664291 | 0.91868  | 0.085432 | 1                                                              | H | 3.732152 | 0.07314  | 0.174947 |
| 1                                                              | H | 3.683126 | -0.73705 | 0.436153 | 1                                                              | H | 3.198    | -1.5759  | 0.176695 |

C8-NO<sub>2</sub>-PU\_7H E<sub>tot</sub> = -616.162730 a.u.  
Gibbs free energy E<sub>G</sub> = -616.103174 a.u.

|   |   |          |          |          |
|---|---|----------|----------|----------|
| 7 | N | 3.216658 | 0.647833 | 0.000053 |
| 6 | C | 3.097687 | -0.70874 | -0.00017 |
| 7 | N | 1.979247 | -1.44724 | 0.000043 |
| 6 | C | 0.85242  | -0.71574 | 0.000089 |
| 6 | C | 0.861159 | 0.715935 | 0.00009  |
| 6 | C | 2.094873 | 1.379461 | 0.000087 |
| 7 | N | -0.472   | 1.082893 | 0.000098 |
| 6 | C | -1.17701 | -0.09881 | -8E-06   |
| 7 | N | -0.45102 | -1.19536 | 0.000195 |
| 1 | H | 4.042441 | -1.26069 | 0.000378 |
| 1 | H | -0.89882 | 2.003292 | 0.000202 |
| 1 | H | 2.193231 | 2.470913 | 0.000108 |
| 7 | N | -2.64341 | -0.0421  | -0.00013 |
| 8 | O | -3.12865 | 1.101536 | -0.00022 |
| 8 | O | -3.2611  | -1.09759 | -0.00016 |

C2-NO<sub>2</sub>-AD\_7H E<sub>tot</sub> = -616.164390 a.u.  
Gibbs free energy E<sub>G</sub> = -616.103789 a.u.

|   |   |           |           |           |
|---|---|-----------|-----------|-----------|
| 7 | N | -0.778286 | 1.394437  | 0.00003   |
| 6 | C | -1.05578  | 0.085755  | -0.000039 |
| 7 | N | -0.253008 | -0.97154  | -0.00004  |
| 6 | C | 1.046685  | -0.636799 | 0.000055  |
| 6 | C | 1.483745  | 0.727106  | 0.000138  |
| 6 | C | 0.520629  | 1.739294  | 0.000137  |
| 7 | N | 2.863665  | 0.651672  | 0.000196  |
| 6 | C | 3.185962  | -0.697903 | 0.000395  |
| 7 | N | 2.134251  | -1.497187 | -0.000083 |
| 1 | H | 3.519211  | 1.42408   | 0.000131  |
| 1 | H | 0.758995  | 2.808366  | 0.000226  |
| 1 | H | 4.223454  | -1.028278 | 0.000485  |
| 7 | N | -2.55264  | -0.245193 | -0.00024  |
| 8 | O | -2.855151 | -1.434027 | 0.000455  |
| 8 | O | -3.330722 | 0.70475   | -0.000955 |

C8-CN-PU\_7H E<sub>tot</sub> = -503.921405 a.u.  
Gibbs free energy E<sub>G</sub> = -503.864055 a.u.

|   |   |          |          |          |
|---|---|----------|----------|----------|
| 7 | N | 2.848838 | 0.655869 | 0.000043 |
| 6 | C | 2.733274 | -0.69931 | -0.00021 |
| 7 | N | 1.615239 | -1.4401  | 0.000021 |
| 6 | C | 0.4859   | -0.71206 | 0.00006  |
| 6 | C | 0.491673 | 0.716993 | 0.000069 |
| 6 | C | 1.723033 | 1.383299 | 0.00008  |
| 7 | N | -0.83964 | 1.083723 | 0.000116 |
| 6 | C | -1.56935 | -0.10173 | -0.00022 |
| 7 | N | -0.81321 | -1.19538 | 0.000269 |
| 1 | H | 3.678579 | -1.25044 | 0.0004   |
| 1 | H | -1.23008 | 2.01924  | 0.000329 |
| 1 | H | 1.818583 | 2.475154 | 0.000137 |
| 6 | C | -2.99562 | -0.07756 | -0.00024 |
| 7 | N | -4.16559 | -0.00436 | -0.00018 |

C2-CN-PU\_7H E<sub>tot</sub> = -503.922890 a.u.  
Gibbs free energy E<sub>G</sub> = -503.865575 a.u.

|   |   |           |           |           |
|---|---|-----------|-----------|-----------|
| 7 | N | -1.160143 | 1.346391  | -0.000178 |
| 6 | C | -1.444089 | 0.016587  | -0.000381 |
| 7 | N | -0.594212 | -1.028503 | -0.000187 |
| 6 | C | 0.696014  | -0.666001 | 0.000006  |
| 6 | C | 1.109813  | 0.703521  | 0.000097  |
| 6 | C | 0.132959  | 1.702128  | 0.000025  |
| 7 | N | 2.491962  | 0.65321   | 0.000302  |
| 6 | C | 2.837914  | -0.689868 | 0.000239  |
| 7 | N | 1.800191  | -1.50749  | 0.000192  |
| 1 | H | 3.133293  | 1.437443  | 0.000332  |
| 1 | H | 0.360448  | 2.773896  | 0.00011   |
| 1 | H | 3.881128  | -1.002523 | 0.00037   |
| 6 | C | -2.857071 | -0.310695 | -0.000199 |
| 7 | N | -3.998955 | -0.569728 | -0.000062 |

C8-CHO-PU\_7H E<sub>tot</sub> = -525.013652 a.u.  
Gibbs free energy E<sub>G</sub> = -524.945777 a.u.

|   |   |          |          |          |
|---|---|----------|----------|----------|
| 7 | N | 2.844098 | 0.815538 | -0.00002 |
| 6 | C | 2.845361 | -0.54703 | 0.000019 |
| 7 | N | 1.797586 | -1.38134 | 0.000093 |
| 6 | C | 0.606663 | -0.75388 | 0.000023 |
| 6 | C | 0.488809 | 0.674017 | -7.3E-05 |
| 6 | C | 1.660753 | 1.442802 | -8.4E-05 |
| 7 | N | -0.86599 | 0.922584 | -0.00014 |
| 6 | C | -1.49474 | -0.31131 | -0.00014 |
| 7 | N | -0.64561 | -1.34004 | 0.000095 |
| 1 | H | 3.835943 | -1.01228 | 0.000217 |
| 1 | H | -1.35651 | 1.810795 | -0.00021 |
| 1 | H | 1.661576 | 2.539006 | -0.00016 |
| 6 | C | -2.96458 | -0.42086 | -0.00023 |
| 8 | O | -3.69438 | 0.563568 | 0.00049  |
| 1 | H | -3.35028 | -1.46565 | -0.00102 |

C2-CHO-PU\_7H E<sub>tot</sub> = -525.005733 a.u.  
Gibbs free energy E<sub>G</sub> = -524.938678 a.u.

|   |   |           |           |           |
|---|---|-----------|-----------|-----------|
| 7 | N | 0.995362  | 1.507603  | -0.000148 |
| 6 | C | 1.394479  | 0.205626  | -0.000486 |
| 7 | N | 0.621999  | -0.897894 | -0.000252 |
| 6 | C | -0.689202 | -0.639235 | -0.000099 |
| 6 | C | -1.214014 | 0.694329  | 0.000061  |
| 6 | C | -0.320136 | 1.767499  | 0.000069  |
| 7 | N | -2.586981 | 0.534154  | 0.000245  |
| 6 | C | -2.824898 | -0.834041 | -0.000229 |
| 7 | N | -1.727345 | -1.566231 | 0.000215  |
| 1 | H | -3.288825 | 1.264642  | 0.000585  |
| 1 | H | -0.633932 | 2.817808  | 0.000191  |
| 1 | H | -3.840713 | -1.227231 | -0.000195 |
| 6 | C | 2.892859  | 0.034436  | -0.000026 |
| 8 | O | 3.471382  | -1.035354 | 0.000324  |
| 1 | H | 3.436639  | 1.0125    | 0.000662  |

|                                                  |    |          |          |                                                  |    |    |           |           |           |
|--------------------------------------------------|----|----------|----------|--------------------------------------------------|----|----|-----------|-----------|-----------|
| C8-CHO-PU_7H $E_{\text{tot}} = -525.003418$ a.u. |    |          |          | C2-CHO-PU_7H $E_{\text{tot}} = -525.006594$ a.u. |    |    |           |           |           |
| Gibbs free energy $E_G = -524.936268$ a.u.       |    |          |          | Gibbs free energy $E_G = -524.939398$ a.u.       |    |    |           |           |           |
| 7                                                | N  | 2.970464 | 0.487118 | -3.9E-05                                         | 7  | N  | -1.17644  | 1.188475  | 0.000053  |
| 6                                                | C  | 2.733412 | -0.85547 | -7.9E-05                                         | 6  | C  | -1.364897 | -0.157068 | 0.00009   |
| 7                                                | N  | 1.557347 | -1.49514 | 0.000024                                         | 7  | N  | -0.426089 | -1.127526 | 0.000068  |
| 6                                                | C  | 0.49196  | -0.67113 | 0.000035                                         | 6  | C  | 0.832802  | -0.671024 | 0.000015  |
| 6                                                | C  | 0.62689  | 0.754518 | 0.000004                                         | 6  | C  | 1.137149  | 0.725565  | -0.000004 |
| 6                                                | C  | 1.913817 | 1.309395 | -1.5E-05                                         | 6  | C  | 0.081318  | 1.644597  | 0.000023  |
| 7                                                | N  | -0.66428 | 1.233197 | -5.6E-05                                         | 7  | N  | 2.518348  | 0.785624  | 0.000006  |
| 6                                                | C  | -1.50578 | 0.118192 | 0.000083                                         | 6  | C  | 2.971463  | -0.526164 | -0.000146 |
| 7                                                | N  | -0.83993 | -1.03338 | 0.000126                                         | 7  | N  | 2.002426  | -1.423244 | 0.000059  |
| 1                                                | H  | 3.628102 | -1.48576 | 0.000108                                         | 1  | H  | 3.094647  | 1.618805  | -0.000051 |
| 1                                                | H  | -0.95993 | 2.203261 | -7.7E-05                                         | 1  | H  | 0.228816  | 2.731216  | 0.000015  |
| 1                                                | H  | 2.105104 | 2.389038 | -6.9E-05                                         | 1  | H  | 4.036571  | -0.753492 | -0.00019  |
| 6                                                | C  | -2.97445 | 0.313981 | 0.000114                                         | 6  | C  | -2.780711 | -0.674207 | 0.000101  |
| 8                                                | O  | -3.79627 | -0.58263 | -0.00022                                         | 8  | O  | -3.778009 | 0.022746  | -0.000162 |
| 1                                                | H  | -3.2834  | 1.395086 | 0.000574                                         | 1  | H  | -2.826422 | -1.791997 | -0.000252 |
| C8-Cl-PU_7H $E_{\text{tot}} = -871.367421$ a.u.  |    |          |          | C2-Cl-PU_7H $E_{\text{tot}} = -871.370729$ a.u.  |    |    |           |           |           |
| Gibbs free energy $E_G = -871.31708$ a.u.        |    |          |          | Gibbs free energy $E_G = -871.320551$ a.u.       |    |    |           |           |           |
| 7                                                | N  | 2.968099 | 0.639871 | 0.000137                                         | 7  | N  | -1.061812 | 1.342753  | -0.00007  |
| 6                                                | C  | 2.839325 | -0.70945 | 0.000338                                         | 6  | C  | -1.326318 | 0.021505  | -0.00012  |
| 7                                                | N  | 1.71181  | -1.44255 | 0.000045                                         | 7  | N  | -0.488964 | -1.015364 | -0.00004  |
| 6                                                | C  | 0.591451 | -0.70601 | -1.1E-05                                         | 6  | C  | 0.805032  | -0.650891 | 0.00003   |
| 6                                                | C  | 0.611177 | 0.721789 | 0.000021                                         | 6  | C  | 1.215678  | 0.717073  | 0.000034  |
| 6                                                | C  | 1.842561 | 1.376751 | 0.000053                                         | 6  | C  | 0.232771  | 1.706831  | 0.000009  |
| 7                                                | N  | -0.72887 | 1.094856 | -9.4E-05                                         | 7  | N  | 2.601478  | 0.668536  | 0.000088  |
| 6                                                | C  | -1.44846 | -0.08588 | 0.000033                                         | 6  | C  | 2.947112  | -0.671574 | 0.000181  |
| 7                                                | N  | -0.71949 | -1.17912 | -0.00023                                         | 7  | N  | 1.908524  | -1.49136  | 0.000054  |
| 1                                                | H  | 3.778351 | -1.2718  | -0.00018                                         | 1  | H  | 3.242133  | 1.452793  | -0.00000  |
| 1                                                | H  | -1.12337 | 2.027582 | 0.000034                                         | 1  | H  | 0.448982  | 2.780886  | 0.000011  |
| 1                                                | H  | 1.946895 | 2.467893 | 0.000031                                         | 1  | H  | 3.990266  | -0.984774 | 0.000248  |
| 17                                               | Cl | -3.16701 | -0.03519 | -8.6E-05                                         | 17 | Cl | -3.037742 | -0.383443 | -0.00008  |
| C8-F-PU_7H $E_{\text{tot}} = -510.938689$ a.u.   |    |          |          | C2-F-PU_7H $E_{\text{tot}} = -510.948485$ a.u.   |    |    |           |           |           |
| Gibbs free energy $E_G = -510.885856$ a.u.       |    |          |          | Gibbs free energy $E_G = -510.895513$ a.u.       |    |    |           |           |           |
| 7                                                | N  | 2.550567 | 0.650149 | 0.000117                                         | 7  | N  | -1.574291 | 1.148209  | -0.000048 |
| 6                                                | C  | 2.428655 | -0.69817 | 0.000303                                         | 6  | C  | -1.703512 | -0.186637 | -0.000063 |
| 7                                                | N  | 1.30401  | -1.43792 | 0.000031                                         | 7  | N  | -0.790435 | -1.149075 | -0.000019 |
| 6                                                | C  | 0.180803 | -0.70903 | -0.00002                                         | 6  | C  | 0.466944  | -0.669475 | 0.000018  |
| 6                                                | C  | 0.193978 | 0.719616 | 0.000009                                         | 6  | C  | 0.750479  | 0.731072  | 0.000006  |
| 6                                                | C  | 1.41938  | 1.380996 | 0.000027                                         | 6  | C  | -0.317041 | 1.628546  | -0.000006 |
| 7                                                | N  | -1.15332 | 1.086933 | -8.5E-05                                         | 7  | N  | 2.136255  | 0.80843   | 0.000022  |
| 6                                                | C  | -1.84741 | -0.10128 | 0.000005                                         | 6  | C  | 2.601586  | -0.49328  | 0.000164  |
| 7                                                | N  | -1.1299  | -1.19143 | -0.00021                                         | 7  | N  | 1.64132   | -1.404863 | 0.000005  |
| 1                                                | H  | 3.3701   | -1.25653 | -0.00017                                         | 1  | H  | 2.703188  | 1.647398  | -0.000111 |
| 1                                                | H  | -1.5566  | 2.015961 | 0.00007                                          | 1  | H  | -0.197769 | 2.717459  | -0.000019 |
| 1                                                | H  | 1.517268 | 2.472754 | 0.00001                                          | 1  | H  | 3.668793  | -0.710914 | 0.000218  |
| 9                                                | F  | -3.17586 | -0.0599  | -9.4E-05                                         | 9  | F  | -2.983876 | -0.614911 | -0.000057 |

|                   |   |          |          |                                     |   |   |           |                   |           |   |   |                                     |           |           |   |   |           |           |           |
|-------------------|---|----------|----------|-------------------------------------|---|---|-----------|-------------------|-----------|---|---|-------------------------------------|-----------|-----------|---|---|-----------|-----------|-----------|
| C8-H-AD_7H        |   |          |          | E <sub>tot</sub> = -411.735954 a.u. |   |   |           | C2-H-AD_7H        |           |   |   | E <sub>tot</sub> = -411.735954 a.u. |           |           |   |   |           |           |           |
| Gibbs free energy |   |          |          | E <sub>G</sub> = -411.673762 a.u.   |   |   |           | Gibbs free energy |           |   |   | E <sub>G</sub> = -411.673762 a.u.   |           |           |   |   |           |           |           |
| 7                 | N | -2.12563 | 0.684039 | -0.00026                            | 7 | N | -2.12563  | 0.684039          | -0.00026  | 7 | N | -2.12563                            | 0.684039  | -0.00026  | 7 | N | -2.12563  | 0.684039  | -0.00026  |
| 6                 | C | -2.0303  | -0.66959 | -9.7E-05                            | 6 | C | -2.0303   | -0.66959          | -9.7E-05  | 6 | C | -2.0303                             | -0.66959  | -9.7E-05  | 6 | C | -2.0303   | -0.66959  | -9.7E-05  |
| 7                 | N | -0.92259 | -1.42993 | 0.000027                            | 7 | N | -0.92259  | -1.42993          | 0.000027  | 7 | N | -0.92259                            | -1.42993  | 0.000027  | 7 | N | -0.92259  | -1.42993  | 0.000027  |
| 6                 | C | 0.219001 | -0.72192 | 0.000092                            | 6 | C | 0.219001  | -0.72192          | 0.000092  | 6 | C | 0.219001                            | -0.72192  | 0.000092  | 6 | C | 0.219001  | -0.72192  | 0.000092  |
| 6                 | C | 0.234645 | 0.706284 | -5.1E-05                            | 6 | C | 0.234645  | 0.706284          | -5.1E-05  | 6 | C | 0.234645                            | 0.706284  | -5.1E-05  | 6 | C | 0.234645  | 0.706284  | -5.1E-05  |
| 6                 | C | -0.98209 | 1.390693 | -0.00022                            | 6 | C | -0.98209  | 1.390693          | -0.00022  | 6 | C | -0.98209                            | 1.390693  | -0.00022  | 6 | C | -0.98209  | 1.390693  | -0.00022  |
| 7                 | N | 1.579429 | 1.045547 | 0.000083                            | 7 | N | 1.579429  | 1.045547          | 0.000083  | 7 | N | 1.579429                            | 1.045547  | 0.000083  | 7 | N | 1.579429  | 1.045547  | 0.000083  |
| 6                 | C | 2.285114 | -0.14627 | 0.000431                            | 6 | C | 2.285114  | -0.14627          | 0.000431  | 6 | C | 2.285114                            | -0.14627  | 0.000431  | 6 | C | 2.285114  | -0.14627  | 0.000431  |
| 7                 | N | 1.516735 | -1.22169 | 0.000003                            | 7 | N | 1.516735  | -1.22169          | 0.000003  | 7 | N | 1.516735                            | -1.22169  | 0.000003  | 7 | N | 1.516735  | -1.22169  | 0.000003  |
| 1                 | H | -1.0606  | 2.484487 | -0.0003                             | 1 | N | -1.0606   | 2.484487          | -0.0003   | 1 | N | -1.0606                             | 2.484487  | -0.0003   | 1 | N | -1.0606   | 2.484487  | -0.0003   |
| 1                 | H | 3.374333 | -0.15507 | 0.000616                            | 1 | H | 3.374333  | -0.15507          | 0.000616  | 1 | H | 3.374333                            | -0.15507  | 0.000616  | 1 | H | 3.374333  | -0.15507  | 0.000616  |
| 1                 | H | -2.98376 | -1.20761 | -0.00027                            | 1 | H | -2.98376  | -1.20761          | -0.00027  | 1 | H | -2.98376                            | -1.20761  | -0.00027  | 1 | H | -2.98376  | -1.20761  | -0.00027  |
| 1                 | H | 1.97617  | 1.977259 | 0.000072                            | 1 | H | 1.97617   | 1.977259          | 0.000072  | 1 | H | 1.97617                             | 1.977259  | 0.000072  | 1 | H | 1.97617   | 1.977259  | 0.000072  |
| C8-Me-PU_7H       |   |          |          | E <sub>tot</sub> = -451.038815 a.u. |   |   |           | C2-Me-PU_7H       |           |   |   | E <sub>tot</sub> = -451.035984 a.u. |           |           |   |   |           |           |           |
| Gibbs free energy |   |          |          | E <sub>G</sub> = -450.952769 a.u.   |   |   |           | Gibbs free energy |           |   |   | E <sub>G</sub> = -450.95092 a.u.    |           |           |   |   |           |           |           |
| 7                 | N | -2.60006 | 0.641637 | -0.00019                            | 7 | N | 1.496747  | 1.199555          | -0.000042 | 7 | N | 1.496747                            | 1.199555  | -0.000042 | 7 | N | 1.496747  | 1.199555  | -0.000042 |
| 6                 | C | -2.47222 | -0.70748 | -0.00048                            | 6 | C | 1.712007  | -0.148928         | -0.000046 | 6 | C | 1.712007                            | -0.148928 | -0.000046 | 6 | C | 1.712007  | -0.148928 | -0.000046 |
| 7                 | N | -1.3452  | -1.44164 | -9.1E-05                            | 7 | N | 0.772433  | -1.115108         | -0.000032 | 7 | N | 0.772433                            | -1.115108 | -0.000032 | 7 | N | 0.772433  | -1.115108 | -0.000032 |
| 6                 | C | -0.22117 | -0.70756 | 0.000014                            | 6 | C | -0.492567 | -0.665247         | 0.000012  | 6 | C | -0.492567                           | -0.665247 | 0.000012  | 6 | C | -0.492567 | -0.665247 | 0.000012  |
| 6                 | C | -0.23995 | 0.720219 | 0.000001                            | 6 | C | -0.814002 | 0.723426          | 0.000034  | 6 | C | -0.814002                           | 0.723426  | 0.000034  | 6 | C | -0.814002 | 0.723426  | 0.000034  |
| 6                 | C | -1.4709  | 1.375028 | -6.3E-05                            | 6 | C | 0.233029  | 1.646748          | -0.00002  | 6 | C | 0.233029                            | 1.646748  | -0.00002  | 6 | C | 0.233029  | 1.646748  | -0.00002  |
| 7                 | N | 1.097406 | 1.088611 | 0.000175                            | 7 | N | -2.201237 | 0.768519          | -0.000057 | 7 | N | -2.201237                           | 0.768519  | -0.000057 | 7 | N | -2.201237 | 0.768519  | -0.000057 |
| 6                 | C | 1.845648 | -0.08439 | -1.3E-05                            | 6 | C | -2.635626 | -0.545832         | 0.000002  | 6 | C | -2.635626                           | -0.545832 | 0.000002  | 6 | C | -2.635626 | -0.545832 | 0.000002  |
| 7                 | N | 1.087752 | -1.17354 | 0.000384                            | 7 | N | -1.653773 | -1.431727         | -0.000004 | 7 | N | -1.653773                           | -1.431727 | -0.000004 | 7 | N | -1.653773 | -1.431727 | -0.000004 |
| 1                 | H | -3.41207 | -1.269   | 0.000219                            | 1 | H | -2.787769 | 1.593873          | 0.000521  | 1 | H | -2.787769                           | 1.593873  | 0.000521  | 1 | H | -2.787769 | 1.593873  | 0.000521  |
| 1                 | H | 1.470007 | 2.030214 | 0.000098                            | 1 | H | 0.079495  | 2.732811          | -0.00002  | 1 | H | 0.079495                            | 2.732811  | -0.00002  | 1 | H | 0.079495  | 2.732811  | -0.00002  |
| 1                 | H | -1.57472 | 2.466668 | -6E-06                              | 1 | H | -3.697526 | -0.788367         | -0.000019 | 1 | H | -3.697526                           | -0.788367 | -0.000019 | 1 | H | -3.697526 | -0.788367 | -0.000019 |
| 6                 | C | 3.337952 | -0.06806 | 0.000099                            | 6 | C | 3.154414  | -0.584359         | 0.000041  | 6 | C | 3.154414                            | -0.584359 | 0.000041  | 6 | C | 3.154414  | -0.584359 | 0.000041  |
| 1                 | H | 3.729059 | 0.451038 | -0.89175                            | 1 | H | 3.671682  | -0.181647         | 0.886251  | 1 | H | 3.671682                            | -0.181647 | 0.886251  | 1 | H | 3.671682  | -0.181647 | 0.886251  |
| 1                 | H | 3.728928 | 0.451445 | 0.891764                            | 1 | H | 3.219264  | -1.679614         | -0.000518 | 1 | H | 3.219264                            | -1.679614 | -0.000518 | 1 | H | 3.219264  | -1.679614 | -0.000518 |
| 1                 | H | 3.703342 | -1.10245 | 0.000358                            | 1 | H | 3.672135  | -0.180589         | -0.885407 | 1 | H | 3.672135                            | -0.180589 | -0.885407 | 1 | H | 3.672135  | -0.180589 | -0.885407 |
| C8-OMe- PU_7H     |   |          |          | E <sub>tot</sub> = -526.220894 a.u. |   |   |           | C2-OMe- PU_7H     |           |   |   | E <sub>tot</sub> = -526.222037 a.u. |           |           |   |   |           |           |           |
| Gibbs free energy |   |          |          | E <sub>G</sub> = -526.131069 a.u.   |   |   |           | Gibbs free energy |           |   |   | E <sub>G</sub> = -526.131784 a.u.   |           |           |   |   |           |           |           |
| 7                 | N | -3.05633 | 0.368489 | -0.00012                            | 7 | N | -0.87114  | 1.628906          | -0.000144 | 7 | N | -0.87114                            | 1.628906  | -0.000144 | 7 | N | -0.87114  | 1.628906  | -0.000144 |
| 6                 | C | -2.74174 | -0.94521 | 0.000067                            | 6 | C | -1.33506  | 0.350464          | 0.000054  | 6 | C | -1.33506                            | 0.350464  | 0.000054  | 6 | C | -1.33506  | 0.350464  | 0.000054  |
| 7                 | N | -1.52014 | -1.51663 | -0.00001                            | 7 | N | -0.636292 | -0.794465         | 0.000141  | 7 | N | -0.636292                           | -0.794465 | 0.000141  | 7 | N | -0.636292 | -0.794465 | 0.000141  |
| 6                 | C | -0.5119  | -0.63535 | -5E-06                              | 6 | C | 0.696294  | -0.614405         | 0.00011   | 6 | C | 0.696294                            | -0.614405 | 0.00011   | 6 | C | 0.696294  | -0.614405 | 0.00011   |
| 6                 | C | -0.73081 | 0.778008 | -4.6E-05                            | 6 | C | 1.293736  | 0.678106          | -0.000038 | 6 | C | 1.293736                            | 0.678106  | -0.000038 | 6 | C | 1.293736  | 0.678106  | -0.000038 |
| 6                 | C | -2.03673 | 1.25438  | -0.00012                            | 6 | C | 0.456547  | 1.797655          | -0.000174 | 6 | C | 0.456547                            | 1.797655  | -0.000174 | 6 | C | 0.456547  | 1.797655  | -0.000174 |
| 7                 | N | 0.546612 | 1.33624  | 0.000037                            | 7 | N | 2.663003  | 0.436389          | 0.00004   | 7 | N | 2.663003                            | 0.436389  | 0.00004   | 7 | N | 2.663003  | 0.436389  | 0.00004   |
| 6                 | C | 1.427135 | 0.268626 | 0.000099                            | 6 | C | 2.817884  | -0.935884         | 0.000154  | 6 | C | 2.817884                            | -0.935884 | 0.000154  | 6 | C | 2.817884  | -0.935884 | 0.000154  |
| 7                 | N | 0.84993  | -0.92142 | -6E-06                              | 7 | N | 1.671908  | -1.601882         | 0.000246  | 7 | N | 1.671908                            | -1.601882 | 0.000246  | 7 | N | 1.671908  | -1.601882 | 0.000246  |
| 1                 | H | -3.59202 | -1.63497 | -0.00031                            | 1 | H | 3.406517  | 1.123348          | -0.00012  | 1 | H | 3.406517                            | 1.123348  | -0.00012  | 1 | H | 3.406517  | 1.123348  | -0.00012  |
| 1                 | H | 0.80651  | 2.314456 | -0.00015                            | 1 | H | 0.829316  | 2.828901          | -0.000284 | 1 | H | 0.829316                            | 2.828901  | -0.000284 | 1 | H | 0.829316  | 2.828901  | -0.000284 |
| 1                 | H | -2.29063 | 2.320772 | -0.00017                            | 1 | H | 3.80622   | -1.393335         | 0.000213  | 1 | H | 3.80622                             | -1.393335 | 0.000213  | 1 | H | 3.80622   | -1.393335 | 0.000213  |
| 8                 | O | 2.733313 | 0.537797 | 0.000105                            | 8 | O | -2.686472 | 0.289639          | -0.000136 | 8 | O | -2.686472                           | 0.289639  | -0.000136 | 8 | O | -2.686472 | 0.289639  | -0.000136 |
| 6                 | C | 3.599356 | -0.63222 | 0.000065                            | 6 | C | -3.272229 | -1.029651         | -0.000148 | 6 | C | -3.272229                           | -1.029651 | -0.000148 | 6 | C | -3.272229 | -1.029651 | -0.000148 |
| 1                 | H | 4.617222 | -0.22576 | 0.000075                            | 1 | H | -2.965251 | -1.590829         | 0.895763  | 1 | H | -2.965251                           | -1.590829 | 0.895763  | 1 | H | -2.965251 | -1.590829 | 0.895763  |
| 1                 | H | 3.410018 | -1.23656 | 0.898774                            | 1 | H | -4.355436 | -0.854595         | -0.000326 | 1 | H | -4.355436                           | -0.854595 | -0.000326 | 1 | H | -4.355436 | -0.854595 | -0.000326 |
| 1                 | H | 3.410015 | -1.23651 | -0.89868                            | 1 | H | -2.964977 | -1.590945         | -0.895892 | 1 | H | -2.964977                           | -1.590945 | -0.895892 | 1 | H | -2.964977 | -1.590945 | -0.895892 |

|                                                     |   |          |          |                                                     |   |   |           |           |           |
|-----------------------------------------------------|---|----------|----------|-----------------------------------------------------|---|---|-----------|-----------|-----------|
| C8-OMe- PU_7H $E_{\text{tot}} = -526.211236$ a.u.   |   |          |          | C2-OMe- PU_7H $E_{\text{tot}} = -526.220388$ a.u.   |   |   |           |           |           |
| Gibbs free energy $E_{\text{G}} = -526.121766$ a.u. |   |          |          | Gibbs free energy $E_{\text{G}} = -526.130338$ a.u. |   |   |           |           |           |
| 7                                                   | N | -2.89475 | 0.872809 | -0.00019                                            | 7 | N | 1.167766  | 1.068588  | 0.00002   |
| 6                                                   | C | -2.9321  | -0.47915 | -0.00019                                            | 6 | C | 1.277406  | -0.283115 | -0.000011 |
| 7                                                   | N | -1.904   | -1.3496  | -0.00011                                            | 7 | N | 0.297709  | -1.203454 | -0.00002  |
| 6                                                   | C | -0.69806 | -0.76271 | -3.9E-05                                            | 6 | C | -0.931554 | -0.674188 | -0.000037 |
| 6                                                   | C | -0.54512 | 0.65798  | -3.8E-05                                            | 6 | C | -1.169425 | 0.736103  | -0.000042 |
| 6                                                   | C | -1.67955 | 1.460684 | -9.7E-05                                            | 6 | C | -0.071579 | 1.591281  | -0.000008 |
| 7                                                   | N | 0.83491  | 0.86638  | 0.000074                                            | 7 | N | -2.554096 | 0.863382  | -0.00013  |
| 6                                                   | C | 1.410196 | -0.40146 | 0.000069                                            | 6 | C | -3.063692 | -0.421545 | -0.000075 |
| 7                                                   | N | 0.538137 | -1.39254 | 0.000032                                            | 7 | N | -2.137747 | -1.36676  | -0.000118 |
| 1                                                   | H | -3.9334  | -0.92228 | -0.00026                                            | 1 | H | -3.091364 | 1.72123   | -0.000037 |
| 1                                                   | H | 1.311685 | 1.758058 | -0.00011                                            | 1 | H | -0.15354  | 2.684388  | -0.00002  |
| 1                                                   | H | -1.64534 | 2.556757 | -9.9E-05                                            | 1 | H | -4.138155 | -0.600946 | -0.000105 |
| 8                                                   | O | 2.732727 | -0.61341 | 0.000146                                            | 8 | O | 2.520977  | -0.818682 | 0.000121  |
| 6                                                   | C | 3.594418 | 0.540888 | 0.00026                                             | 6 | C | 3.633499  | 0.098462  | 0.000212  |
| 1                                                   | H | 4.615129 | 0.141887 | 0.000367                                            | 1 | H | 3.613997  | 0.736985  | 0.89693   |
| 1                                                   | H | 3.43577  | 1.148069 | -0.90791                                            | 1 | H | 4.52378   | -0.543523 | 0.000252  |
| 1                                                   | H | 3.435561 | 1.148045 | 0.90841                                             | 1 | H | 3.614106  | 0.737031  | -0.896473 |
| C8-OH- PU_7H $E_{\text{tot}} = -486.944078$ a.u.    |   |          |          | C2-OH- PU_7H $E_{\text{tot}} = -486.947466$ a.u.    |   |   |           |           |           |
| Gibbs free energy $E_{\text{G}} = -486.878838$ a.u. |   |          |          | Gibbs free energy $E_{\text{G}} = -486.882007$ a.u. |   |   |           |           |           |
| 7                                                   | N | 2.570194 | 0.625693 | 0.000088                                            | 7 | N | 1.551645  | 1.192762  | 0.00015   |
| 6                                                   | C | 2.431312 | -0.71819 | -6.8E-05                                            | 6 | C | 1.72563   | -0.149076 | 0.000406  |
| 7                                                   | N | 1.295864 | -1.44548 | 0                                                   | 7 | N | 0.800436  | -1.122605 | 0.000187  |
| 6                                                   | C | 0.18069  | -0.70452 | 0.000005                                            | 6 | C | -0.462768 | -0.665405 | 0.000026  |
| 6                                                   | C | 0.212035 | 0.725244 | 0.000039                                            | 6 | C | -0.767733 | 0.728254  | -0.000038 |
| 6                                                   | C | 1.443486 | 1.369789 | 0.000104                                            | 6 | C | 0.287061  | 1.641855  | -0.000012 |
| 7                                                   | N | -1.12971 | 1.111524 | -3.8E-05                                            | 7 | N | -2.157194 | 0.785092  | -0.000183 |
| 6                                                   | C | -1.85621 | -0.05941 | -8.1E-05                                            | 6 | C | -2.602445 | -0.521756 | -0.000157 |
| 7                                                   | N | -1.13378 | -1.16397 | -1.1E-05                                            | 7 | N | -1.627323 | -1.419278 | -0.000114 |
| 1                                                   | H | 3.365036 | -1.28985 | 0.000226                                            | 1 | H | -2.736305 | 1.615409  | -0.000154 |
| 1                                                   | H | -1.51562 | 2.047378 | 0.000135                                            | 1 | H | 0.144246  | 2.728696  | -0.000106 |
| 1                                                   | H | 1.554787 | 2.460305 | 0.000134                                            | 1 | H | -3.665982 | -0.756241 | -0.000253 |
| 8                                                   | O | -3.19603 | 0.014181 | -8.7E-05                                            | 8 | O | 3.024932  | -0.541097 | -0.000106 |
| 1                                                   | H | -3.52175 | -0.90311 | -0.00006                                            | 1 | H | 3.00717   | -1.51412  | -0.000276 |
| C8-OH- PU_7H $E_{\text{tot}} = -486.933447$ a.u.    |   |          |          | C2-OH- PU_7H $E_{\text{tot}} = -486.946823$ a.u.    |   |   |           |           |           |
| Gibbs free energy $E_{\text{G}} = -486.869533$ a.u. |   |          |          | Gibbs free energy $E_{\text{G}} = -486.881414$ a.u. |   |   |           |           |           |
| 7                                                   | N | 2.562673 | 0.655807 | 0.00007                                             | 7 | N | 1.56693   | 1.131727  | 0.000219  |
| 6                                                   | C | 2.44341  | -0.69066 | -0.00027                                            | 6 | C | 1.710908  | -0.21991  | 0.000453  |
| 7                                                   | N | 1.319565 | -1.43452 | -1.1E-05                                            | 7 | N | 0.767112  | -1.167274 | 0.000181  |
| 6                                                   | C | 0.191991 | -0.7114  | 0.000017                                            | 6 | C | -0.480168 | -0.671373 | -0.000002 |
| 6                                                   | C | 0.204105 | 0.71731  | 0.000036                                            | 6 | C | -0.75696  | 0.730464  | -0.000022 |
| 6                                                   | C | 1.424821 | 1.381994 | 0.00011                                             | 6 | C | 0.315504  | 1.620254  | 0.000057  |
| 7                                                   | N | -1.14377 | 1.081613 | -2.6E-05                                            | 7 | N | -2.144126 | 0.818747  | -0.000198 |
| 6                                                   | C | -1.85849 | -0.11182 | -0.0001                                             | 6 | C | -2.617661 | -0.479074 | -0.000225 |
| 7                                                   | N | -1.11173 | -1.19469 | 0.000109                                            | 7 | N | -1.663705 | -1.397412 | -0.000184 |
| 1                                                   | H | 3.385766 | -1.24799 | 0.000478                                            | 1 | H | -2.705071 | 1.661452  | -0.000153 |
| 1                                                   | H | -1.5175  | 2.022975 | 0.000235                                            | 1 | H | 0.202387  | 2.710188  | -0.000009 |
| 1                                                   | H | 1.5195   | 2.474305 | 0.000177                                            | 1 | H | -3.686341 | -0.689296 | -0.000351 |
| 8                                                   | O | -3.20418 | -0.15716 | -0.00006                                            | 8 | O | 2.990436  | -0.67323  | -0.000106 |
| 1                                                   | H | -3.57656 | 0.737926 | -0.00016                                            | 1 | H | 3.552325  | 0.120813  | -0.000326 |

C8-NH<sub>2</sub>- PU\_7H E<sub>tot</sub> = -467.082512 a.u.  
 Gibbs free energy E<sub>G</sub>= -467.00578 a.u.

|   |   |          |          |          |
|---|---|----------|----------|----------|
| 7 | N | 2.583791 | 0.634514 | 0.000082 |
| 6 | C | 2.449926 | -0.7089  | 0.002612 |
| 7 | N | 1.317595 | -1.44232 | 0.002619 |
| 6 | C | 0.196764 | -0.70749 | -0.00184 |
| 6 | C | 0.223813 | 0.722397 | -0.00168 |
| 6 | C | 1.450884 | 1.372637 | 0.001094 |
| 7 | N | -1.11831 | 1.103081 | 0.009631 |
| 6 | C | -1.85648 | -0.07435 | 0.000707 |
| 7 | N | -1.11077 | -1.1724  | 0.006696 |
| 1 | H | 3.385954 | -1.27717 | 0.004728 |
| 1 | H | -1.48478 | 2.039684 | -0.1053  |
| 1 | H | 1.557448 | 2.463839 | 0.000997 |
| 7 | N | -3.22982 | -0.06102 | -0.0774  |
| 1 | H | -3.63843 | -0.97517 | 0.091965 |
| 1 | H | -3.707   | 0.690016 | 0.410844 |

C2-NH<sub>2</sub>- PU\_7H E<sub>tot</sub> = -467.087348 a.u.  
 Gibbs free energy E<sub>G</sub>= -467.010526 a.u.

|   |   |           |           |           |
|---|---|-----------|-----------|-----------|
| 7 | N | -1.536799 | 1.183797  | 0.007392  |
| 6 | C | -1.720715 | -0.171669 | -0.00314  |
| 7 | N | -0.776714 | -1.137809 | 0.005359  |
| 6 | C | 0.478449  | -0.667724 | -0.000251 |
| 6 | C | 0.781574  | 0.72661   | -0.006434 |
| 6 | C | -0.276049 | 1.636627  | 0.005818  |
| 7 | N | 2.172069  | 0.789526  | -0.0053   |
| 6 | C | 2.621476  | -0.515675 | 0.001604  |
| 7 | N | 1.650057  | -1.416743 | 0.006692  |
| 1 | H | 2.748209  | 1.621665  | -0.011058 |
| 1 | H | -0.13514  | 2.724111  | 0.018397  |
| 1 | H | 3.686113  | -0.745971 | 0.002199  |
| 7 | N | -3.032326 | -0.588226 | -0.065868 |
| 1 | H | -3.207453 | -1.555795 | 0.174187  |
| 1 | H | -3.734149 | 0.093154  | 0.192774  |

C8-NO<sub>2</sub>-PU\_3H E<sub>tot</sub> = -616.154310 a.u.  
 Gibbs free energy E<sub>G</sub>= -616.093342 a.u.

|   |   |           |           |           |
|---|---|-----------|-----------|-----------|
| 7 | N | 0.726731  | 1.436678  | 0.000046  |
| 6 | C | 1.062845  | 0.173891  | 0.000039  |
| 7 | N | 0.214242  | -0.892265 | 0.000002  |
| 6 | C | -1.121382 | -0.640365 | 0.000036  |
| 6 | C | -1.565853 | 0.754405  | 0.000053  |
| 6 | C | -0.59918  | 1.75636   | 0.000041  |
| 7 | N | -2.93381  | 0.741005  | 0.000143  |
| 6 | C | -3.215506 | -0.581887 | 0.000137  |
| 7 | N | -2.156081 | -1.478015 | -0.000061 |
| 1 | H | 0.618149  | -1.832519 | -0.000032 |
| 1 | H | -0.846591 | 2.821367  | 0.000111  |
| 1 | H | -4.243444 | -0.947949 | 0.000092  |
| 7 | N | 2.507275  | -0.210606 | -0.000011 |
| 8 | O | 2.736153  | -1.431982 | -0.000208 |
| 8 | O | 3.338578  | 0.682869  | -0.000161 |

C2-NO<sub>2</sub>-PU\_3H E<sub>tot</sub> = -616.156681 a.u.  
 Gibbs free energy E<sub>G</sub>= -616.097011 a.u.

|   |   |           |           |           |
|---|---|-----------|-----------|-----------|
| 7 | N | 0.726731  | 1.436678  | 0.000046  |
| 6 | C | 1.062845  | 0.173891  | 0.000039  |
| 7 | N | 0.214242  | -0.892265 | 0.000002  |
| 6 | C | -1.121382 | -0.640365 | 0.000036  |
| 6 | C | -1.565853 | 0.754405  | 0.000053  |
| 6 | C | -0.59918  | 1.75636   | 0.000041  |
| 7 | N | -2.93381  | 0.741005  | 0.000143  |
| 6 | C | -3.215506 | -0.581887 | 0.000137  |
| 7 | N | -2.156081 | -1.478015 | -0.000061 |
| 1 | H | 0.618149  | -1.832519 | -0.000032 |
| 1 | H | -0.846591 | 2.821367  | 0.000111  |
| 1 | H | -4.243444 | -0.947949 | 0.000092  |
| 7 | N | 2.507275  | -0.210606 | -0.000011 |
| 8 | O | 2.736153  | -1.431982 | -0.000208 |
| 8 | O | 3.338578  | 0.682869  | -0.000161 |

C8-CN- PU\_3H E<sub>tot</sub> = -503.916727 a.u.  
 Gibbs free energy E<sub>G</sub>= -503.859019 a.u.

|   |   |           |           |           |
|---|---|-----------|-----------|-----------|
| 7 | N | -2.804898 | 0.707231  | 0.000209  |
| 6 | C | -2.75132  | -0.612758 | 0.000277  |
| 7 | N | -1.590048 | -1.337483 | 0.000183  |
| 6 | C | -0.394882 | -0.677618 | 0.000077  |
| 6 | C | -0.409123 | 0.772658  | 0.000008  |
| 6 | C | -1.641325 | 1.420477  | 0.000054  |
| 7 | N | 0.896551  | 1.197873  | -0.000144 |
| 6 | C | 1.576328  | 0.028116  | 0.000266  |
| 7 | N | 0.845061  | -1.16029  | -0.000134 |
| 1 | H | -3.676213 | -1.193519 | 0.000341  |
| 1 | H | -1.611493 | -2.356472 | 0.000179  |
| 1 | H | -1.732907 | 2.510755  | 0.000026  |
| 6 | C | 3.009032  | -0.010064 | -0.000205 |
| 7 | N | 4.180242  | -0.048135 | -0.000601 |

C2-CN- PU\_3H E<sub>tot</sub> = -503.910832 a.u.  
 Gibbs free energy E<sub>G</sub>= -503.853456 a.u.

|   |   |           |           |           |
|---|---|-----------|-----------|-----------|
| 7 | N | 1.091952  | 1.391241  | -0.000006 |
| 6 | C | 1.444886  | 0.112897  | -0.000129 |
| 7 | N | 0.550448  | -0.938958 | -0.000083 |
| 6 | C | -0.781173 | -0.667978 | 0.000007  |
| 6 | C | -1.208977 | 0.727107  | 0.000121  |
| 6 | C | -0.230529 | 1.715746  | 0.00015   |
| 7 | N | -2.579522 | 0.729353  | 0.000051  |
| 6 | C | -2.875693 | -0.588009 | -0.00018  |
| 7 | N | -1.824078 | -1.496002 | 0.000302  |
| 1 | H | 0.885397  | -1.902649 | -0.000066 |
| 1 | H | -0.469156 | 2.783189  | 0.000081  |
| 1 | H | -3.906866 | -0.944474 | 0.000106  |
| 6 | C | 2.835666  | -0.24546  | -0.000127 |
| 7 | N | 3.959136  | -0.580189 | -0.000146 |

C8-CHO- PU\_3H  $E_{\text{tot}} = -524.999636$  a.u.  
Gibbs free energy  $E_G = -524.931972$  a.u.

|   |   |           |           |           |
|---|---|-----------|-----------|-----------|
| 7 | N | -2.92171  | 0.565815  | -0.000067 |
| 6 | C | -2.766844 | -0.747008 | 0.000077  |
| 7 | N | -1.556038 | -1.382807 | 0.0001    |
| 6 | C | -0.409931 | -0.636037 | 0.000046  |
| 6 | C | -0.536583 | 0.811698  | -0.000077 |
| 6 | C | -1.814064 | 1.363939  | -0.000176 |
| 7 | N | 0.734403  | 1.326915  | 0.00011   |
| 6 | C | 1.507642  | 0.211836  | 0.000209  |
| 7 | N | 0.859286  | -1.022901 | -0.000175 |
| 1 | H | -3.646091 | -1.395066 | 0.000046  |
| 1 | H | -1.501361 | -2.40062  | 0.0001    |
| 1 | H | -1.988597 | 2.444301  | -0.000092 |
| 6 | C | 2.987071  | 0.353462  | 0.000253  |
| 8 | O | 3.775093  | -0.578255 | -0.000226 |
| 1 | H | 3.319957  | 1.420939  | -0.000013 |

C2-CHO- PU\_3H  $E_{\text{tot}} = -525.006500$  a.u.  
Gibbs free energy  $E_G = -524.938374$  a.u.

|   |   |           |           |           |
|---|---|-----------|-----------|-----------|
| 7 | N | 0.932823  | 1.567859  | -0.000141 |
| 6 | C | 1.390479  | 0.318788  | 0.000021  |
| 7 | N | 0.59096   | -0.795487 | 0.00008   |
| 6 | C | -0.754252 | -0.647247 | 0.000046  |
| 6 | C | -1.301552 | 0.710099  | -0.000116 |
| 6 | C | -0.409589 | 1.781838  | -0.000255 |
| 7 | N | -2.664416 | 0.597899  | 0.000249  |
| 6 | C | -2.848111 | -0.74426  | 0.000145  |
| 7 | N | -1.72886  | -1.559211 | -0.000227 |
| 1 | H | 1.050694  | -1.710337 | 0.000072  |
| 1 | H | -0.744038 | 2.823608  | -0.000087 |
| 1 | H | -3.847392 | -1.182923 | 0.000097  |
| 6 | C | 2.852291  | 0.067271  | -0.000001 |
| 8 | O | 3.32206   | -1.064563 | 0.000183  |
| 1 | H | 3.475107  | 0.989812  | -0.000313 |

C8-CHO- PU\_3H  $E_{\text{tot}} = -524.998002$  a.u.  
Gibbs free energy  $E_G = -524.930509$  a.u.

|   |   |           |           |           |
|---|---|-----------|-----------|-----------|
| 7 | N | 2.813552  | 0.85776   | -0.000017 |
| 6 | C | 2.867003  | -0.463683 | -0.000008 |
| 7 | N | 1.769576  | -1.279969 | 0.00005   |
| 6 | C | 0.522381  | -0.720493 | 0.000035  |
| 6 | C | 0.418375  | 0.728845  | -0.000006 |
| 6 | C | 1.596642  | 1.473429  | -0.000011 |
| 7 | N | -0.913541 | 1.047149  | 0.000018  |
| 6 | C | -1.507494 | -0.168125 | -0.000452 |
| 7 | N | -0.675509 | -1.294427 | 0.000261  |
| 1 | H | 3.836598  | -0.966505 | 0.000075  |
| 1 | H | 1.875841  | -2.293644 | 0.000148  |
| 1 | H | 1.599396  | 2.567744  | -0.000068 |
| 6 | C | -2.980195 | -0.384058 | -0.000366 |
| 8 | O | -3.813393 | 0.506215  | 0.000381  |
| 1 | H | -3.263502 | -1.466399 | -0.000535 |

C2-CHO- PU\_3H  $E_{\text{tot}} = -524.995120$  a.u.  
Gibbs free energy  $E_G = -524.927741$  a.u.

|   |   |           |           |           |
|---|---|-----------|-----------|-----------|
| 7 | N | -1.124141 | 1.212194  | 0.000152  |
| 6 | C | -1.367109 | -0.092932 | 0.000176  |
| 7 | N | -0.370475 | -1.048664 | 0.000002  |
| 6 | C | 0.928662  | -0.664147 | -0.000056 |
| 6 | C | 1.228767  | 0.762538  | -0.000065 |
| 6 | C | 0.157659  | 1.656701  | -0.000033 |
| 7 | N | 2.590729  | 0.890569  | 0.000153  |
| 6 | C | 3.007086  | -0.398416 | 0.00025   |
| 7 | N | 2.046375  | -1.395414 | -0.00006  |
| 1 | H | -0.610754 | -2.041488 | -0.000153 |
| 1 | H | 0.300977  | 2.741761  | 0.00025   |
| 1 | H | 4.06731   | -0.656208 | -0.000215 |
| 6 | C | -2.757556 | -0.634418 | 0.000147  |
| 8 | O | -3.767024 | 0.041047  | -0.000113 |
| 1 | H | -2.803808 | -1.759194 | 0.000558  |

C8-Cl- PU\_3H  $E_{\text{tot}} = -871.362744$  a.u.  
Gibbs free energy  $E_G = -871.31204$  a.u.

|    |    |           |           |          |
|----|----|-----------|-----------|----------|
| 7  | N  | -2.915236 | 0.70673   | 0.000108 |
| 6  | C  | -2.863898 | -0.60994  | 0.000224 |
| 7  | N  | -1.698123 | -1.335566 | 0.000192 |
| 6  | C  | -0.505379 | -0.675812 | 0.000093 |
| 6  | C  | -0.518404 | 0.775801  | -0.00002 |
| 6  | C  | -1.748147 | 1.421744  | -0.00006 |
| 7  | N  | 0.794006  | 1.196575  | 0.000104 |
| 6  | C  | 1.454764  | 0.029645  | 0.000052 |
| 7  | N  | 0.737642  | -1.158016 | -0.00011 |
| 1  | H  | -3.787265 | -1.193159 | 0.000269 |
| 1  | H  | -1.718424 | -2.354106 | 0.000212 |
| 1  | H  | -1.840943 | 2.511697  | 0.000019 |
| 17 | Cl | 3.176764  | -0.028301 | -0.00025 |

C2-Cl- PU\_3H  $E_{\text{tot}} = -871.358895$  a.u.  
Gibbs free energy  $E_G = -871.308459$  a.u.

|    |    |           |           |          |
|----|----|-----------|-----------|----------|
| 7  | N  | 1.002408  | 1.373047  | 0.000046 |
| 6  | C  | 1.329778  | 0.109361  | 0.000051 |
| 7  | N  | 0.445577  | -0.9361   | -0.00004 |
| 6  | C  | -0.894277 | -0.652501 | -0.00003 |
| 6  | C  | -1.308786 | 0.740672  | -0.00000 |
| 6  | C  | -0.324809 | 1.716556  | -0.00001 |
| 7  | N  | -2.68764  | 0.751995  | -0.00004 |
| 6  | C  | -2.990031 | -0.556666 | 0.000553 |
| 7  | N  | -1.937577 | -1.474538 | -0.00029 |
| 1  | H  | 0.779104  | -1.898543 | -0.00015 |
| 1  | H  | -0.546329 | 2.787428  | 0.000044 |
| 1  | H  | -4.022173 | -0.910962 | 0.000181 |
| 17 | Cl | 3.009339  | -0.360194 | -0.00007 |

C8-F- PU\_3H  $E_{\text{tot}} = -510.937515$  a.u.  
Gibbs free energy  $E_G = -510.884072$  a.u.

|   |   |           |           |           |
|---|---|-----------|-----------|-----------|
| 7 | N | -2.493728 | 0.717531  | 0.000044  |
| 6 | C | -2.451702 | -0.598259 | 0.00016   |
| 7 | N | -1.289058 | -1.331503 | 0.000151  |
| 6 | C | -0.094022 | -0.679703 | 0.000072  |
| 6 | C | -0.096707 | 0.774028  | -0.000048 |
| 6 | C | -1.321632 | 1.426146  | -0.000104 |
| 7 | N | 1.22044   | 1.184906  | 0.000107  |
| 6 | C | 1.855805  | 0.012509  | 0.000046  |
| 7 | N | 1.147853  | -1.169438 | -0.000106 |
| 1 | H | -3.378184 | -1.176495 | 0.000194  |
| 1 | H | -1.31561  | -2.34987  | 0.000173  |
| 1 | H | -1.408584 | 2.516525  | -0.000032 |
| 9 | F | 3.183709  | -0.04544  | -0.000274 |

C2-F- PU\_3H  $E_{\text{tot}} = -510.932605$  a.u.  
Gibbs free energy  $E_G = -510.879613$  a.u.

|   |   |           |           |           |
|---|---|-----------|-----------|-----------|
| 7 | N | 1.513638  | 1.192017  | -0.000008 |
| 6 | C | 1.708033  | -0.091007 | -0.000295 |
| 7 | N | 0.754806  | -1.062751 | -0.000195 |
| 6 | C | -0.559902 | -0.662358 | -0.000012 |
| 6 | C | -0.846009 | 0.762427  | 0.000189  |
| 6 | C | 0.217555  | 1.649344  | 0.000322  |
| 7 | N | -2.221346 | 0.896034  | -0.000227 |
| 6 | C | -2.638611 | -0.37783  | -0.000156 |
| 7 | N | -1.669377 | -1.387572 | 0.000544  |
| 1 | H | 1.013546  | -2.048277 | -0.000159 |
| 1 | H | 0.088874  | 2.73506   | 0.000102  |
| 1 | H | -3.697652 | -0.640365 | 0.000142  |
| 9 | F | 2.962754  | -0.57711  | -0.00013  |

C8-H- PU\_3H  $E_{\text{tot}} = -411.727345$  a.u.  
Gibbs free energy  $E_G = -411.664858$  a.u.

|   |   |          |          |          |
|---|---|----------|----------|----------|
| 7 | N | 2.072937 | 0.745955 | 0.000539 |
| 6 | C | 2.048809 | -0.57306 | 0.000429 |
| 7 | N | 0.901102 | -1.3226  | -9E-06   |
| 6 | C | -0.30896 | -0.69164 | -0.00031 |
| 6 | C | -0.327   | 0.761381 | -0.00014 |
| 6 | C | 0.888871 | 1.432181 | 0.000271 |
| 7 | N | -1.6492  | 1.149621 | -0.00059 |
| 6 | C | -2.29914 | -0.0285  | 0.000644 |
| 7 | N | -1.54133 | -1.19673 | -0.00084 |
| 1 | H | 0.958232 | 2.524362 | 0.000366 |
| 1 | H | -3.38904 | -0.08448 | 0.000104 |
| 1 | H | 2.985325 | -1.13528 | 0.000592 |
| 1 | H | 0.945502 | -2.34051 | -0.00015 |

C2-H- PU\_3H  $E_{\text{tot}} = -411.727345$  a.u.  
Gibbs free energy  $E_G = -411.664858$  a.u.

|   |   |          |          |          |
|---|---|----------|----------|----------|
| 7 | N | 2.072937 | 0.745955 | 0.000539 |
| 6 | C | 2.048809 | -0.57306 | 0.000429 |
| 7 | N | 0.901102 | -1.3226  | -9E-06   |
| 6 | C | -0.30896 | -0.69164 | -0.00031 |
| 6 | C | -0.327   | 0.761381 | -0.00014 |
| 6 | C | 0.888871 | 1.432181 | 0.000271 |
| 7 | N | -1.6492  | 1.149621 | -0.00059 |
| 6 | C | -2.29914 | -0.0285  | 0.000644 |
| 7 | N | -1.54133 | -1.19673 | -0.00084 |
| 1 | H | 0.958232 | 2.524362 | 0.000366 |
| 1 | H | -3.38904 | -0.08448 | 0.000104 |
| 1 | H | 2.985325 | -1.13528 | 0.000592 |
| 1 | H | 0.945502 | -2.34051 | -0.00015 |

C8-Me- PU\_3H  $E_{\text{tot}} = -451.030158$  a.u.  
Gibbs free energy  $E_G = -450.943926$  a.u.

|   |   |           |           |           |
|---|---|-----------|-----------|-----------|
| 7 | N | 2.544541  | 0.715094  | -0.000173 |
| 6 | C | 2.498045  | -0.601375 | -0.000283 |
| 7 | N | 1.335088  | -1.331912 | -0.000198 |
| 6 | C | 0.136032  | -0.680142 | -0.000061 |
| 6 | C | 0.144076  | 0.773607  | 0.000057  |
| 6 | C | 1.370568  | 1.422782  | 0.000042  |
| 7 | N | -1.16971  | 1.183228  | -0.000011 |
| 6 | C | -1.856055 | 0.020096  | -0.000037 |
| 7 | N | -1.102111 | -1.161698 | 0.000227  |
| 1 | H | 3.423758  | -1.181168 | -0.000356 |
| 1 | H | 1.361675  | -2.350128 | -0.000205 |
| 1 | H | 1.459328  | 2.513366  | -0.000044 |
| 6 | C | -3.34656  | -0.037763 | 0.000352  |
| 1 | H | -3.70622  | -0.587411 | -0.88567  |
| 1 | H | -3.705807 | -0.588034 | 0.886152  |
| 1 | H | -3.764033 | 0.977166  | 0.000078  |

C2-Me- PU\_3H  $E_{\text{tot}} = -451.028624$  a.u.  
Gibbs free energy  $E_G = -450.9412$  a.u.

|   |   |           |           |           |
|---|---|-----------|-----------|-----------|
| 7 | N | -1.440553 | 1.236491  | 0.000004  |
| 6 | C | -1.713073 | -0.060779 | 0.000129  |
| 7 | N | -0.728303 | -1.02184  | 0.000104  |
| 6 | C | 0.587614  | -0.657864 | 0.000011  |
| 6 | C | 0.911099  | 0.755026  | -0.000103 |
| 6 | C | -0.139829 | 1.659643  | -0.000141 |
| 7 | N | 2.287952  | 0.857846  | 0.000006  |
| 6 | C | 2.67409   | -0.429581 | 0.000033  |
| 7 | N | 1.685086  | -1.412484 | -0.00019  |
| 1 | H | -0.974528 | -2.010433 | 0.000117  |
| 1 | H | 0.01686   | 2.742897  | -0.000081 |
| 1 | H | 3.727425  | -0.71521  | -0.000086 |
| 6 | C | -3.13648  | -0.541864 | 0.000116  |
| 1 | H | -3.348309 | -1.156344 | -0.891645 |
| 1 | H | -3.348239 | -1.156601 | 0.891712  |
| 1 | H | -3.802995 | 0.32812   | 0.000258  |



C8-OMe- PU\_3H  $E_{tot} = -526.215092$  a.u.  
Gibbs free energy  $E_G = -526.124594$  a.u.

|   |   |           |           |           |
|---|---|-----------|-----------|-----------|
| 7 | N | -2.821288 | 0.951938  | 0.000203  |
| 6 | C | -2.949884 | -0.355737 | 0.000228  |
| 7 | N | -1.888695 | -1.234815 | 0.000153  |
| 6 | C | -0.617191 | -0.745403 | 0.000017  |
| 6 | C | -0.43304  | 0.698701  | -0.000017 |
| 6 | C | -1.563314 | 1.502571  | 0.000086  |
| 7 | N | 0.922491  | 0.933876  | -0.00005  |
| 6 | C | 1.425797  | -0.318308 | -0.000343 |
| 7 | N | 0.543017  | -1.393967 | -0.000122 |
| 1 | H | -3.942504 | -0.811383 | 0.000314  |
| 1 | H | -2.046443 | -2.240681 | 0.000174  |
| 1 | H | -1.509232 | 2.595047  | 0.000129  |
| 8 | O | 2.729463  | -0.597194 | -0.000217 |
| 6 | C | 3.614824  | 0.549188  | -0.000015 |
| 1 | H | 4.626593  | 0.125817  | 0.000063  |
| 1 | H | 3.442125  | 1.161803  | -0.897479 |
| 1 | H | 3.441928  | 1.161655  | 0.897514  |

C2-OMe- PU\_3H  $E_{tot} = -526.212989$  a.u.  
Gibbs free energy  $E_G = -526.122762$  a.u.

|   |   |           |           |           |
|---|---|-----------|-----------|-----------|
| 7 | N | 1.118481  | 1.102136  | -0.00004  |
| 6 | C | 1.281589  | -0.204989 | -0.000049 |
| 7 | N | 0.260839  | -1.118824 | 0.000039  |
| 6 | C | -1.032124 | -0.661023 | 0.00004   |
| 6 | C | -1.258648 | 0.769998  | 0.000049  |
| 6 | C | -0.155669 | 1.606773  | 0.000002  |
| 7 | N | -2.630141 | 0.964523  | 0.000552  |
| 6 | C | -3.100176 | -0.289906 | -0.000798 |
| 7 | N | -2.173874 | -1.339366 | 0.000159  |
| 1 | H | 0.470527  | -2.1152   | 0.00009   |
| 1 | H | -0.241765 | 2.697486  | 0.000204  |
| 1 | H | -4.169404 | -0.507903 | -0.000367 |
| 8 | O | 2.495857  | -0.786784 | -0.00002  |
| 6 | C | 3.633431  | 0.114394  | -0.000023 |
| 1 | H | 3.614178  | 0.747891  | -0.898216 |
| 1 | H | 3.61414   | 0.747947  | 0.898131  |
| 1 | H | 4.507906  | -0.546705 | 0.000016  |

C8-OMe- PU\_3H  $E_{tot} = -526.212890$  a.u.  
Gibbs free energy  $E_G = -526.122596$  a.u.

|   |   |           |           |           |
|---|---|-----------|-----------|-----------|
| 7 | N | 3.005447  | 0.443715  | -0.00002  |
| 6 | C | 2.778203  | -0.851569 | 0.000002  |
| 7 | N | 1.517731  | -1.409748 | 0.000008  |
| 6 | C | 0.428395  | -0.594716 | 0.000014  |
| 6 | C | 0.636425  | 0.84537   | -0.000007 |
| 6 | C | 1.945878  | 1.312893  | -0.000035 |
| 7 | N | -0.599462 | 1.440543  | 0.000018  |
| 6 | C | -1.425721 | 0.375481  | 0.000082  |
| 7 | N | -0.867677 | -0.902776 | 0.000012  |
| 1 | H | 3.610464  | -1.55847  | 0         |
| 1 | H | 1.398591  | -2.421013 | 0.000012  |
| 1 | H | 2.188315  | 2.37937   | -0.000037 |
| 8 | O | -2.746998 | 0.564693  | 0.000007  |
| 6 | C | -3.572786 | -0.623291 | -0.00005  |
| 1 | H | -4.604345 | -0.250163 | -0.000091 |
| 1 | H | -3.3758   | -1.227197 | -0.898632 |
| 1 | H | -3.375878 | -1.227223 | 0.898532  |

C2-OMe- PU\_3H  $E_{tot} = -526.203064$  a.u.  
Gibbs free energy  $E_G = -526.113033$  a.u.

|   |   |           |           |           |
|---|---|-----------|-----------|-----------|
| 7 | N | -0.814486 | 1.625303  | -0.000015 |
| 6 | C | -1.320984 | 0.407918  | -0.000067 |
| 7 | N | -0.567049 | -0.739351 | -0.000016 |
| 6 | C | 0.804403  | -0.627295 | -0.000034 |
| 6 | C | 1.394806  | 0.688695  | -0.000039 |
| 6 | C | 0.54009   | 1.782637  | 0.000042  |
| 7 | N | 2.768578  | 0.51836   | -0.000299 |
| 6 | C | 2.89515   | -0.816599 | -0.00031  |
| 7 | N | 1.726256  | -1.584818 | 0.000237  |
| 1 | H | -0.984218 | -1.666606 | 0.000084  |
| 1 | H | 0.904251  | 2.814709  | -0.000133 |
| 1 | H | 3.870027  | -1.306773 | -0.000198 |
| 8 | O | -2.669586 | 0.320424  | 0.000083  |
| 6 | C | -3.285208 | -0.97912  | 0.000281  |
| 1 | H | -3.016096 | -1.54641  | -0.908374 |
| 1 | H | -3.015849 | -1.546262 | 0.908955  |
| 1 | H | -4.364063 | -0.785932 | 0.000412  |

C8-OH- PU\_3H  $E_{\text{tot}} = -486.939490$  a.u.  
Gibbs free energy  $E_G = -486.873581$  a.u.

|   |   |           |           |           |
|---|---|-----------|-----------|-----------|
| 7 | N | -2.49731  | 0.737968  | 0.000016  |
| 6 | C | -2.471129 | -0.576255 | 0.000013  |
| 7 | N | -1.31293  | -1.322676 | -0.00002  |
| 6 | C | -0.110056 | -0.685983 | 0.000003  |
| 6 | C | -0.096398 | 0.769508  | 0.000032  |
| 6 | C | -1.315031 | 1.433885  | 0.000004  |
| 7 | N | 1.223518  | 1.15778   | -0.000162 |
| 6 | C | 1.865763  | -0.027816 | 0.000517  |
| 7 | N | 1.121323  | -1.194955 | 0.000069  |
| 1 | H | -3.402719 | -1.146111 | 0.000016  |
| 1 | H | -1.349511 | -2.340341 | -0.000033 |
| 1 | H | -1.391206 | 2.524994  | -0.000106 |
| 8 | O | 3.203109  | -0.119946 | -0.00026  |
| 1 | H | 3.537458  | 0.79416   | -0.000691 |

C2-OH- PU\_3H  $E_{\text{tot}} = -486.937002$  a.u.  
Gibbs free energy  $E_G = -486.871473$  a.u.

|   |   |           |           |           |
|---|---|-----------|-----------|-----------|
| 7 | N | 1.510664  | 1.174249  | -0.00005  |
| 6 | C | 1.712858  | -0.127247 | -0.000105 |
| 7 | N | 0.732913  | -1.075942 | -0.000045 |
| 6 | C | -0.576998 | -0.660725 | 0.000022  |
| 6 | C | -0.851454 | 0.761647  | 0.000065  |
| 6 | C | 0.221313  | 1.637891  | 0.000039  |
| 7 | N | -2.22819  | 0.908762  | 0.000233  |
| 6 | C | -2.655746 | -0.360825 | -0.000162 |
| 7 | N | -1.693552 | -1.377796 | 0.000127  |
| 1 | H | 0.975337  | -2.065019 | -0.000048 |
| 1 | H | 0.099181  | 2.724844  | 0.000097  |
| 1 | H | -3.716712 | -0.615233 | 0.000004  |
| 8 | O | 2.965555  | -0.635651 | -0.000119 |
| 1 | H | 3.565076  | 0.131258  | -0.000107 |

C8-OH- PU\_3H  $E_{\text{tot}} = -486.938355$  a.u.  
Gibbs free energy  $E_G = -486.872502$  a.u.

|   |   |           |           |           |
|---|---|-----------|-----------|-----------|
| 7 | N | 2.513791  | 0.692686  | -0.000238 |
| 6 | C | 2.456961  | -0.620366 | -0.00027  |
| 7 | N | 1.280703  | -1.33917  | -0.000176 |
| 6 | C | 0.094165  | -0.673264 | -0.000019 |
| 6 | C | 0.113729  | 0.78236   | 0.000021  |
| 6 | C | 1.348941  | 1.416709  | -0.000091 |
| 7 | N | -1.192808 | 1.213473  | 0.000004  |
| 6 | C | -1.867619 | 0.054506  | 0.000398  |
| 7 | N | -1.152923 | -1.142482 | 0.000168  |
| 1 | H | 3.374563  | -1.212456 | -0.000364 |
| 1 | H | 1.295319  | -2.357277 | -0.000194 |
| 1 | H | 1.449816  | 2.505708  | -0.000178 |
| 8 | O | -3.208656 | 0.029981  | 0.000241  |
| 1 | H | -3.468851 | -0.907035 | 0.000271  |

C2-OH- PU\_3H  $E_{\text{tot}} = -486.924866$  a.u.  
Gibbs free energy  $E_G = -486.860497$  a.u.

|   |   |           |           |           |
|---|---|-----------|-----------|-----------|
| 7 | N | 1.491343  | 1.210464  | -0.000038 |
| 6 | C | 1.727887  | -0.081328 | -0.000216 |
| 7 | N | 0.751592  | -1.048302 | -0.000122 |
| 6 | C | -0.566696 | -0.654299 | 0.000014  |
| 6 | C | -0.866235 | 0.759516  | 0.000147  |
| 6 | C | 0.196548  | 1.649262  | 0.000197  |
| 7 | N | -2.245461 | 0.881019  | 0.000036  |
| 6 | C | -2.649684 | -0.396359 | -0.000159 |
| 7 | N | -1.668162 | -1.394947 | 0.000376  |
| 1 | H | 0.967922  | -2.044062 | -0.000099 |
| 1 | H | 0.058004  | 2.734591  | 0.000109  |
| 1 | H | -3.705609 | -0.67077  | 0.000098  |
| 8 | O | 3.027393  | -0.472388 | -0.000196 |
| 1 | H | 3.10444   | -1.439052 | -0.000198 |

C8-NH<sub>2</sub>- PU\_3H  $E_{\text{tot}} = -467.081976$  a.u.  
Gibbs free energy  $E_G = -467.0048$  a.u.

|   |   |           |           |           |
|---|---|-----------|-----------|-----------|
| 7 | N | -2.522604 | 0.712205  | 0.003991  |
| 6 | C | -2.480656 | -0.59974  | 0.003232  |
| 7 | N | -1.308658 | -1.331697 | 0.000187  |
| 6 | C | -0.114222 | -0.679297 | -0.002707 |
| 6 | C | -0.118907 | 0.777832  | -0.002659 |
| 6 | C | -1.34854  | 1.424788  | 0.001171  |
| 7 | N | 1.190386  | 1.189357  | -0.001494 |
| 6 | C | 1.86654   | 0.015951  | -0.003468 |
| 7 | N | 1.122831  | -1.168451 | -0.00252  |
| 1 | H | -3.403274 | -1.183931 | 0.004794  |
| 1 | H | -1.332856 | -2.349237 | -0.000948 |
| 1 | H | -1.439289 | 2.514629  | 0.002132  |
| 7 | N | 3.225037  | -0.043906 | -0.04324  |
| 1 | H | 3.736081  | 0.807076  | 0.150315  |
| 1 | H | 3.665107  | -0.9283   | 0.171835  |

C2-NH<sub>2</sub>- PU\_3H  $E_{\text{tot}} = -467.073558$  a.u.  
Gibbs free energy  $E_G = -466.996686$  a.u.

|   |   |           |           |           |
|---|---|-----------|-----------|-----------|
| 7 | N | 1.481805  | 1.203572  | 0.005288  |
| 6 | C | 1.720895  | -0.102657 | -0.001532 |
| 7 | N | 0.731229  | -1.055968 | -0.015315 |
| 6 | C | -0.58305  | -0.65583  | 0.000584  |
| 6 | C | -0.876934 | 0.757634  | 0.006785  |
| 6 | C | 0.18999   | 1.643677  | -0.005605 |
| 7 | N | -2.256546 | 0.887137  | 0.010205  |
| 6 | C | -2.666898 | -0.388395 | 0.005034  |
| 7 | N | -1.690227 | -1.390995 | -0.002568 |
| 1 | H | 0.952521  | -2.047507 | -0.07979  |
| 1 | H | 0.051944  | 2.729408  | -0.016503 |
| 1 | H | -3.724373 | -0.65769  | 0.005794  |
| 7 | N | 3.029011  | -0.548417 | -0.064036 |
| 1 | H | 3.69756   | 0.195973  | 0.106743  |
| 1 | H | 3.251424  | -1.414061 | 0.417151  |

| C8-NO <sub>2</sub> -PU_1H |   | E <sub>tot</sub> = -616.150185 a.u. |           |           |
|---------------------------|---|-------------------------------------|-----------|-----------|
| Gibbs free energy         |   | E <sub>G</sub> = -616.089244 a.u.   |           |           |
| 7                         | N | 3.092628                            | 0.602164  | 0.000434  |
| 6                         | C | 3.03158                             | -0.778356 | 0.000301  |
| 7                         | N | 1.91666                             | -1.471762 | 0.000091  |
| 6                         | C | 0.776908                            | -0.728514 | 0.000023  |
| 6                         | C | 0.770026                            | 0.742416  | 0.00014   |
| 6                         | C | 1.980075                            | 1.403689  | 0.00036   |
| 7                         | N | -0.525469                           | 1.182826  | 0         |
| 6                         | C | -1.180454                           | 0.010505  | -0.0001   |
| 7                         | N | -0.492306                           | -1.170186 | -0.000275 |
| 1                         | H | 3.998514                            | -1.286864 | 0.000368  |
| 1                         | H | 4.010101                            | 1.037249  | 0.000589  |
| 1                         | H | 2.127003                            | 2.484645  | 0.000476  |
| 7                         | N | -2.672119                           | -0.002616 | -0.000319 |
| 8                         | O | -3.217633                           | -1.105046 | -0.000147 |
| 8                         | O | -3.237392                           | 1.09049   | -0.000514 |

| C2-NO <sub>2</sub> -PU_1H |   | E <sub>tot</sub> = -616.154259 a.u. |           |           |
|---------------------------|---|-------------------------------------|-----------|-----------|
| Gibbs free energy         |   | E <sub>G</sub> = -616.094487 a.u.   |           |           |
| 7                         | N | 0.698681                            | 1.293746  | 0.000192  |
| 6                         | C | 1.021605                            | -0.035864 | 0.000056  |
| 7                         | N | 0.188416                            | -1.041301 | -0.000133 |
| 6                         | C | -1.117484                           | -0.678739 | -0.000174 |
| 6                         | C | -1.564016                           | 0.729424  | -0.000056 |
| 6                         | C | -0.601642                           | 1.720796  | 0.000142  |
| 7                         | N | -2.92584                            | 0.756571  | -0.000264 |
| 6                         | C | -3.230954                           | -0.569236 | -0.000056 |
| 7                         | N | -2.199678                           | -1.476696 | -0.00052  |
| 1                         | H | 1.492281                            | 1.936195  | 0.000307  |
| 1                         | H | -0.778341                           | 2.796835  | 0.000227  |
| 1                         | H | -4.269206                           | -0.906068 | -0.000463 |
| 7                         | N | 2.49265                             | -0.281374 | 0.000123  |
| 8                         | O | 2.883438                            | -1.436684 | 0.000125  |
| 8                         | O | 3.207888                            | 0.73895   | 0.000458  |

| C8-CN-PU_1H       |   | E <sub>tot</sub> = -503.912548 a.u. |           |           |
|-------------------|---|-------------------------------------|-----------|-----------|
| Gibbs free energy |   | E <sub>G</sub> = -503.85486 a.u.    |           |           |
| 7                 | N | 2.720685                            | 0.598393  | 0.000405  |
| 6                 | C | 2.657642                            | -0.780934 | 0.000284  |
| 7                 | N | 1.54095                             | -1.472108 | 0.000077  |
| 6                 | C | 0.401006                            | -0.727777 | -0.000093 |
| 6                 | C | 0.395393                            | 0.742703  | 0.000046  |
| 6                 | C | 1.607463                            | 1.400961  | 0.000307  |
| 7                 | N | -0.89645                            | 1.187806  | 0.000031  |
| 6                 | C | -1.580145                           | 0.013376  | -0.000865 |
| 7                 | N | -0.865572                           | -1.170904 | -0.000091 |
| 1                 | H | 3.623351                            | -1.291813 | 0.000439  |
| 1                 | H | 3.638247                            | 1.032891  | 0.000616  |
| 1                 | H | 1.756556                            | 2.481582  | 0.00047   |
| 6                 | C | -3.015617                           | -0.002694 | -0.000401 |
| 7                 | N | -4.187129                           | -0.014112 | -0.000021 |

| C2-CN-PU_1H       |   | E <sub>tot</sub> = -503.907115 a.u. |           |           |
|-------------------|---|-------------------------------------|-----------|-----------|
| Gibbs free energy |   | E <sub>G</sub> = -503.849669 a.u.   |           |           |
| 7                 | N | 1.066651                            | 1.245509  | 0.000184  |
| 6                 | C | 1.400964                            | -0.102479 | 0.000063  |
| 7                 | N | 0.519849                            | -1.088984 | -0.000085 |
| 6                 | C | -0.776893                           | -0.700136 | -0.000169 |
| 6                 | C | -1.20392                            | 0.712239  | -0.000015 |
| 6                 | C | -0.229541                           | 1.688131  | 0.000147  |
| 7                 | N | -2.567012                           | 0.760913  | 0.000086  |
| 6                 | C | -2.890492                           | -0.558017 | -0.000806 |
| 7                 | N | -1.871159                           | -1.481636 | -0.000019 |
| 1                 | H | 1.825658                            | 1.920939  | 0.000342  |
| 1                 | H | -0.393229                           | 2.766627  | 0.000301  |
| 1                 | H | -3.93305                            | -0.881117 | -0.000393 |
| 6                 | C | 2.810598                            | -0.379269 | 0.000194  |
| 7                 | N | 3.971147                            | -0.545698 | 0.000301  |

| C8-CHO- PU_1H     |   | E <sub>tot</sub> = -524.993922 a.u. |           |           |
|-------------------|---|-------------------------------------|-----------|-----------|
| Gibbs free energy |   | E <sub>G</sub> = -524.926397 a.u.   |           |           |
| 7                 | N | 2.83078                             | 0.466544  | 0.000403  |
| 6                 | C | 2.663968                            | -0.906207 | 0.000155  |
| 7                 | N | 1.501332                            | -1.513442 | -0.000072 |
| 6                 | C | 0.415131                            | -0.687357 | -0.000068 |
| 6                 | C | 0.522387                            | 0.782468  | 0.000202  |
| 6                 | C | 1.779541                            | 1.348799  | 0.000427  |
| 7                 | N | -0.734564                           | 1.315339  | 0.000264  |
| 6                 | C | -1.511436                           | 0.196026  | -0.000327 |
| 7                 | N | -0.877477                           | -1.03285  | -0.000182 |
| 1                 | H | 3.59052                             | -1.485591 | 0.000185  |
| 1                 | H | 3.778249                            | 0.830775  | 0.000591  |
| 1                 | H | 2.009247                            | 2.415508  | 0.000659  |
| 6                 | C | -2.991893                           | 0.362401  | -0.00036  |
| 8                 | O | -3.797378                           | -0.552876 | -0.000463 |
| 1                 | H | -3.305672                           | 1.436396  | -0.000801 |

| C2-CHO- PU_1H     |   | E <sub>tot</sub> = -524.990732 a.u. |           |           |
|-------------------|---|-------------------------------------|-----------|-----------|
| Gibbs free energy |   | E <sub>G</sub> = -524.923335 a.u.   |           |           |
| 7                 | N | 0.889993                            | 1.424246  | 0.000217  |
| 6                 | C | 1.360015                            | 0.117938  | 0.000136  |
| 7                 | N | 0.565688                            | -0.942494 | -0.000024 |
| 6                 | C | -0.75611                            | -0.677019 | -0.000108 |
| 6                 | C | -1.318523                           | 0.689635  | -0.000011 |
| 6                 | C | -0.435763                           | 1.752987  | 0.000157  |
| 7                 | N | -2.676624                           | 0.61061   | -0.000141 |
| 6                 | C | -2.874634                           | -0.738591 | -0.00027  |
| 7                 | N | -1.778184                           | -1.558926 | -0.000235 |
| 1                 | H | 1.582062                            | 2.16995   | 0.000333  |
| 1                 | H | -0.699973                           | 2.811649  | 0.000232  |
| 1                 | H | -3.883926                           | -1.154786 | -0.000372 |
| 6                 | C | 2.845661                            | -0.003263 | 0.000243  |
| 8                 | O | 3.461428                            | -1.050041 | -0.000047 |
| 1                 | H | 3.38043                             | 0.989347  | 0.000572  |

C8-CHO- PU\_1H  $E_{\text{tot}} = -524.993886$  a.u.  
Gibbs free energy  $E_G = -524.926391$  a.u.

|   |   |           |           |           |
|---|---|-----------|-----------|-----------|
| 7 | N | 2.739122  | 0.735461  | 0.000036  |
| 6 | C | 2.784877  | -0.64599  | 0.00007   |
| 7 | N | 1.726112  | -1.422501 | 0.000048  |
| 6 | C | 0.530095  | -0.769813 | -0.000021 |
| 6 | C | 0.408484  | 0.698364  | -0.000053 |
| 6 | C | 1.567715  | 1.448565  | -0.00003  |
| 7 | N | -0.911075 | 1.041066  | -0.000076 |
| 6 | C | -1.511524 | -0.177301 | -0.000236 |
| 7 | N | -0.699452 | -1.302012 | 0.000057  |
| 1 | H | 3.788437  | -1.077954 | 0.000135  |
| 1 | H | 3.620144  | 1.23994   | 0.000067  |
| 1 | H | 1.632362  | 2.537708  | -0.000047 |
| 6 | C | -2.990489 | -0.369754 | -0.000213 |
| 8 | O | -3.808507 | 0.53483   | 0.000302  |
| 1 | H | -3.290781 | -1.446852 | -0.000125 |

C2-CHO- PU\_1H  $E_{\text{tot}} = -525.004460$  a.u.  
Gibbs free energy  $E_G = -524.936198$  a.u.

|   |   |           |           |           |
|---|---|-----------|-----------|-----------|
| 7 | N | 1.102854  | 1.055043  | 0.000251  |
| 6 | C | 1.308136  | -0.308051 | 0.000114  |
| 7 | N | 0.334962  | -1.211442 | -0.000095 |
| 6 | C | -0.915487 | -0.701357 | -0.000163 |
| 6 | C | -1.203278 | 0.745818  | -0.000029 |
| 6 | C | -0.134363 | 1.625336  | 0.000187  |
| 7 | N | -2.552453 | 0.92774   | -0.000186 |
| 6 | C | -3.006776 | -0.356981 | -0.000269 |
| 7 | N | -2.086908 | -1.372331 | -0.00038  |
| 1 | H | 1.955298  | 1.617671  | 0.000405  |
| 1 | H | -0.197114 | 2.714664  | 0.000294  |
| 1 | H | -4.077014 | -0.57215  | -0.00047  |
| 6 | C | 2.726908  | -0.730285 | 0.000212  |
| 8 | O | 3.649965  | 0.079043  | 0.000254  |
| 1 | H | 2.879084  | -1.83248  | 0.000296  |

C8-Cl- PU\_1H  $E_{\text{tot}} = -871.359156$  a.u.  
Gibbs free energy  $E_G = -871.308481$  a.u.

|    |    |           |           |          |
|----|----|-----------|-----------|----------|
| 7  | N  | 2.832796  | 0.593994  | 0.000373 |
| 6  | C  | 2.767002  | -0.78089  | 0.000256 |
| 7  | N  | 1.647131  | -1.471771 | 0.000073 |
| 6  | C  | 0.51038   | -0.725927 | -0.00000 |
| 6  | C  | 0.505878  | 0.746548  | 0.000113 |
| 6  | C  | 1.717171  | 1.401544  | 0.000308 |
| 7  | N  | -0.791165 | 1.188252  | 0.000005 |
| 6  | C  | -1.458137 | 0.017383  | -0.00019 |
| 7  | N  | -0.759301 | -1.166705 | -0.00019 |
| 1  | H  | 3.73087   | -1.295471 | 0.000328 |
| 1  | H  | 3.750546  | 1.026949  | 0.000516 |
| 1  | H  | 1.870345  | 2.481235  | 0.000414 |
| 17 | Cl | -3.183044 | -0.010062 | -0.00035 |

C2-Cl- PU\_1H  $E_{\text{tot}} = -871.354833$  a.u.  
Gibbs free energy  $E_G = -871.304418$  a.u.

|    |    |           |           |          |
|----|----|-----------|-----------|----------|
| 7  | N  | -0.965273 | 1.256414  | -0.00021 |
| 6  | C  | -1.284298 | -0.082421 | -0.00009 |
| 7  | N  | -0.429934 | -1.061912 | 0.000072 |
| 6  | C  | 0.882333  | -0.686582 | 0.000139 |
| 6  | C  | 1.31235   | 0.722882  | 0.000031 |
| 6  | C  | 0.343523  | 1.695915  | -0.00015 |
| 7  | N  | 2.684446  | 0.762615  | 0.000108 |
| 6  | C  | 2.995573  | -0.55026  | 0.000359 |
| 7  | N  | 1.963467  | -1.473783 | 0.000318 |
| 1  | H  | -1.725571 | 1.928136  | -0.00035 |
| 1  | H  | 0.502879  | 2.774841  | -0.00026 |
| 1  | H  | 4.034638  | -0.885408 | 0.000448 |
| 17 | Cl | -3.004575 | -0.399889 | -0.00021 |

C8-F- PU\_1H  $E_{\text{tot}} = -510.934568$  a.u.  
Gibbs free energy  $E_G = -510.881123$  a.u.

|   |   |           |           |           |
|---|---|-----------|-----------|-----------|
| 7 | N | 2.413951  | 0.596893  | 0.000321  |
| 6 | C | 2.351342  | -0.776312 | 0.000205  |
| 7 | N | 1.231985  | -1.470084 | 0.000025  |
| 6 | C | 0.095163  | -0.72815  | -0.000047 |
| 6 | C | 0.086609  | 0.747072  | 0.000065  |
| 6 | C | 1.296019  | 1.403254  | 0.000258  |
| 7 | N | -1.213289 | 1.18379   | -0.000041 |
| 6 | C | -1.860307 | 0.010439  | -0.000235 |
| 7 | N | -1.174973 | -1.171309 | -0.000239 |
| 1 | H | 3.315795  | -1.289753 | 0.000275  |
| 1 | H | 3.330643  | 1.031951  | 0.000462  |
| 1 | H | 1.448059  | 2.482993  | 0.000364  |
| 9 | F | -3.19013  | -0.015337 | -0.000338 |

C2-F- PU\_1H  $E_{\text{tot}} = -510.928373$  a.u.  
Gibbs free energy  $E_G = -510.875401$  a.u.

|   |   |           |           |           |
|---|---|-----------|-----------|-----------|
| 7 | N | 1.469456  | 1.068095  | 0.000236  |
| 6 | C | 1.644023  | -0.28909  | 0.000117  |
| 7 | N | 0.722793  | -1.195048 | -0.000048 |
| 6 | C | -0.552911 | -0.698638 | -0.000112 |
| 6 | C | -0.848478 | 0.747548  | -0.000005 |
| 6 | C | 0.202292  | 1.628832  | 0.000176  |
| 7 | N | -2.213861 | 0.913196  | -0.000078 |
| 6 | C | -2.644048 | -0.362346 | -0.000332 |
| 7 | N | -1.699803 | -1.379937 | -0.000289 |
| 1 | H | 2.294665  | 1.658616  | 0.000374  |
| 1 | H | 0.143167  | 2.717421  | 0.000288  |
| 1 | H | -3.709324 | -0.60139  | -0.000417 |
| 9 | F | 2.946237  | -0.641847 | 0.000216  |

C8-H- PU\_1H  $E_{\text{tot}} = -411.722874$  a.u.  
Gibbs free energy  $E_G = -411.660423$  a.u.

|   |   |          |          |          |
|---|---|----------|----------|----------|
| 7 | N | 1.998293 | 0.60907  | 0.000281 |
| 6 | C | 1.944534 | -0.76881 | 0.000166 |
| 7 | N | 0.831723 | -1.46826 | -2.5E-05 |
| 6 | C | -0.31401 | -0.73292 | -9.3E-05 |
| 6 | C | -0.33035 | 0.740831 | 0.00001  |
| 6 | C | 0.875838 | 1.404443 | 0.000212 |
| 7 | N | -1.63187 | 1.170039 | -0.00012 |
| 6 | C | -2.30446 | -0.00402 | -0.00017 |
| 7 | N | -1.58092 | -1.1785  | -0.00034 |
| 1 | H | 1.020069 | 2.486083 | 0.000314 |
| 1 | H | -3.39633 | -0.02647 | -0.00036 |
| 1 | H | 2.913982 | -1.27315 | 0.000243 |
| 1 | H | 2.912345 | 1.049889 | 0.000424 |

C2-H- PU\_1H  $E_{\text{tot}} = -411.722874$  a.u.  
Gibbs free energy  $E_G = -411.660423$  a.u.

|   |   |          |          |          |
|---|---|----------|----------|----------|
| 7 | N | 1.998293 | 0.60907  | 0.000281 |
| 6 | C | 1.944534 | -0.76881 | 0.000166 |
| 7 | N | 0.831723 | -1.46826 | -2.5E-05 |
| 6 | C | -0.31401 | -0.73292 | -9.3E-05 |
| 6 | C | -0.33035 | 0.740831 | 0.00001  |
| 6 | C | 0.875838 | 1.404443 | 0.000212 |
| 7 | N | -1.63187 | 1.170039 | -0.00012 |
| 6 | C | -2.30446 | -0.00402 | -0.00017 |
| 7 | N | -1.58092 | -1.1785  | -0.00034 |
| 1 | H | 1.020069 | 2.486083 | 0.000314 |
| 1 | H | -3.39633 | -0.02647 | -0.00036 |
| 1 | H | 2.913982 | -1.27315 | 0.000243 |
| 1 | H | 2.912345 | 1.049889 | 0.000424 |

C8-Me- PU\_1H  $E_{\text{tot}} = -451.025819$  a.u.  
Gibbs free energy  $E_G = -450.939693$  a.u.

|   |   |           |           |           |
|---|---|-----------|-----------|-----------|
| 7 | N | -2.463188 | 0.595764  | 0.000055  |
| 6 | C | -2.397897 | -0.779803 | 0.000061  |
| 7 | N | -1.279177 | -1.471421 | 0         |
| 6 | C | -0.137902 | -0.727484 | 0.000003  |
| 6 | C | -0.133516 | 0.747381  | -0.000043 |
| 6 | C | -1.343978 | 1.401181  | -0.000013 |
| 7 | N | 1.163733  | 1.182722  | -0.000196 |
| 6 | C | 1.860814  | 0.017928  | 0.000342  |
| 7 | N | 1.128063  | -1.162006 | -0.000251 |
| 1 | H | -3.362826 | -1.292929 | 0.000072  |
| 1 | H | -3.380023 | 1.029767  | 0.000093  |
| 1 | H | -1.498113 | 2.481111  | -0.000028 |
| 6 | C | 3.352727  | -0.013089 | 0.00001   |
| 1 | H | 3.719219  | -0.555915 | 0.887249  |
| 1 | H | 3.718936  | -0.562167 | -0.883422 |
| 1 | H | 3.755306  | 1.00804   | -0.003381 |

C2-Me- PU\_1H  $E_{\text{tot}} = -451.023980$  a.u.  
Gibbs free energy  $E_G = -450.93801$  a.u.

|   |   |           |           |           |
|---|---|-----------|-----------|-----------|
| 7 | N | -1.382972 | 1.124998  | -0.000232 |
| 6 | C | -1.659978 | -0.231989 | -0.000302 |
| 7 | N | -0.713267 | -1.151004 | -0.000166 |
| 6 | C | 0.567893  | -0.692025 | -0.000004 |
| 6 | C | 0.918058  | 0.737319  | 0.000138  |
| 6 | C | -0.109275 | 1.649002  | -0.000012 |
| 7 | N | 2.28575   | 0.859988  | 0.000553  |
| 6 | C | 2.673493  | -0.433919 | -0.000269 |
| 7 | N | 1.699733  | -1.414138 | 0.000484  |
| 1 | H | -2.168557 | 1.766887  | -0.000302 |
| 1 | H | -0.012475 | 2.735827  | 0.000055  |
| 1 | H | 3.731228  | -0.705791 | 0.000427  |
| 6 | C | -3.112288 | -0.6212   | -0.000233 |
| 1 | H | -3.631451 | -0.232771 | 0.89304   |
| 1 | H | -3.63214  | -0.230849 | -0.892258 |
| 1 | H | -3.178726 | -1.715341 | -0.001339 |

C8-OMe- PU\_1H  $E_{\text{tot}} = -526.211017$  a.u.  
Gibbs free energy  $E_G = -526.120493$  a.u.

|   |   |           |           |           |
|---|---|-----------|-----------|-----------|
| 7 | N | -2.755709 | 0.822855  | -0.000366 |
| 6 | C | -2.871348 | -0.54508  | -0.000267 |
| 7 | N | -1.853396 | -1.380571 | -0.000094 |
| 6 | C | -0.624842 | -0.794983 | -0.000037 |
| 6 | C | -0.424089 | 0.668337  | -0.000136 |
| 6 | C | -1.536935 | 1.476835  | -0.000298 |
| 7 | N | 0.91863   | 0.928563  | -0.000019 |
| 6 | C | 1.43126   | -0.326608 | 0.000018  |
| 7 | N | 0.567358  | -1.403165 | 0.000159  |
| 1 | H | -3.894916 | -0.928298 | -0.000326 |
| 1 | H | -3.607028 | 1.373901  | -0.000488 |
| 1 | H | -1.548161 | 2.567056  | -0.00038  |
| 8 | O | 2.74064   | -0.581533 | 0.000374  |
| 6 | C | 3.609291  | 0.575768  | 0.000517  |
| 1 | H | 3.429621  | 1.186872  | 0.897913  |
| 1 | H | 4.627067  | 0.166623  | 0.00082   |
| 1 | H | 3.430093  | 1.186723  | -0.897075 |

C2-OMe- PU\_1H  $E_{\text{tot}} = -526.196289$  a.u.  
Gibbs free energy  $E_G = -526.10652$  a.u.

|   |   |           |           |           |
|---|---|-----------|-----------|-----------|
| 7 | N | 1.0487    | 1.02521   | 0.000126  |
| 6 | C | 1.228286  | -0.343589 | -0.000003 |
| 7 | N | 0.251568  | -1.216914 | -0.000103 |
| 6 | C | -1.003828 | -0.695667 | -0.000205 |
| 6 | C | -1.279598 | 0.75405   | -0.000034 |
| 6 | C | -0.210942 | 1.60862   | 0.000124  |
| 7 | N | -2.642966 | 0.945017  | 0.000152  |
| 6 | C | -3.092593 | -0.325282 | -0.001059 |
| 7 | N | -2.168774 | -1.357371 | 0.000101  |
| 1 | H | 1.855722  | 1.636426  | 0.000283  |
| 1 | H | -0.246226 | 2.698548  | 0.000303  |
| 1 | H | -4.162514 | -0.545146 | -0.000418 |
| 8 | O | 2.490855  | -0.840866 | 0.000157  |
| 6 | C | 3.605849  | 0.062269  | 0.000392  |
| 1 | H | 3.613579  | 0.69036   | 0.910052  |
| 1 | H | 4.496014  | -0.577749 | 0.000476  |
| 1 | H | 3.613846  | 0.690495  | -0.909172 |

C8-OMe- PU\_1H  $E_{\text{tot}} = -526.210636$  a.u.  
Gibbs free energy  $E_G = -526.120166$  a.u.

|   |   |           |           |           |
|---|---|-----------|-----------|-----------|
| 7 | N | -2.909529 | 0.344349  | -0.000431 |
| 6 | C | -2.657801 | -1.004138 | -0.000288 |
| 7 | N | -1.450268 | -1.535705 | -0.000087 |
| 6 | C | -0.428174 | -0.642347 | -0.000043 |
| 6 | C | -0.620633 | 0.821759  | -0.000184 |
| 6 | C | -1.913403 | 1.301119  | -0.000378 |
| 7 | N | 0.597942  | 1.433791  | -0.000008 |
| 6 | C | 1.430532  | 0.364859  | 0.000032  |
| 7 | N | 0.887246  | -0.90597  | 0.000182  |
| 1 | H | -3.540922 | -1.647374 | -0.000341 |
| 1 | H | -3.87748  | 0.647643  | -0.000576 |
| 1 | H | -2.216805 | 2.348161  | -0.000499 |
| 8 | O | 2.748906  | 0.572044  | 0.000358  |
| 6 | C | 3.584864  | -0.610915 | 0.000709  |
| 1 | H | 3.390528  | -1.216698 | -0.896773 |
| 1 | H | 4.613329  | -0.228845 | 0.000938  |
| 1 | H | 3.39006   | -1.216509 | 0.898217  |

C2-OMe- PU\_1H  $E_{\text{tot}} = -526.208965$  a.u.  
Gibbs free energy  $E_G = -526.118637$  a.u.

|   |   |           |           |           |
|---|---|-----------|-----------|-----------|
| 7 | N | 0.775122  | 1.532804  | 0.000254  |
| 6 | C | 1.297382  | 0.257452  | 0.000142  |
| 7 | N | 0.587924  | -0.843633 | -0.00006  |
| 6 | C | -0.765409 | -0.662273 | -0.000128 |
| 6 | C | -1.398884 | 0.667188  | -0.000022 |
| 6 | C | -0.586596 | 1.771239  | 0.000174  |
| 7 | N | -2.767575 | 0.502528  | -0.000212 |
| 6 | C | -2.879369 | -0.838106 | -0.000129 |
| 7 | N | -1.719192 | -1.599945 | -0.000405 |
| 1 | H | 1.431391  | 2.306268  | 0.000389  |
| 1 | H | -0.906501 | 2.813796  | 0.000258  |
| 1 | H | -3.856893 | -1.325021 | -0.000415 |
| 8 | O | 2.646844  | 0.267645  | 0.000219  |
| 6 | C | 3.281461  | -1.037825 | 0.000093  |
| 1 | H | 2.987773  | -1.601084 | -0.897446 |
| 1 | H | 4.356339  | -0.822125 | 0.000183  |
| 1 | H | 2.987668  | -1.601308 | 0.897457  |

C8-OH- PU\_1H  $E_{\text{tot}} = -486.935811$  a.u.  
Gibbs free energy  $E_G = -486.869894$  a.u.

|   |   |           |           |           |
|---|---|-----------|-----------|-----------|
| 7 | N | 2.419491  | 0.615631  | 0.000308  |
| 6 | C | 2.370953  | -0.75581  | 0.000187  |
| 7 | N | 1.258402  | -1.462186 | -0.000001 |
| 6 | C | 0.111256  | -0.734372 | -0.000021 |
| 6 | C | 0.086337  | 0.742835  | 0.000097  |
| 6 | C | 1.289567  | 1.411362  | 0.000251  |
| 7 | N | -1.216784 | 1.156925  | -0.000013 |
| 6 | C | -1.871617 | -0.029512 | 0.000075  |
| 7 | N | -1.148458 | -1.1971   | -0.000266 |
| 1 | H | 3.340593  | -1.259774 | 0.000225  |
| 1 | H | 3.330978  | 1.060566  | 0.000432  |
| 1 | H | 1.432218  | 2.492189  | 0.000343  |
| 8 | O | -3.210916 | -0.090512 | -0.000515 |
| 1 | H | -3.523998 | 0.831198  | -0.000602 |

C2-OH- PU\_1H  $E_{\text{tot}} = -486.918429$  a.u.  
Gibbs free energy  $E_G = -486.854697$  a.u.

|   |   |           |           |           |
|---|---|-----------|-----------|-----------|
| 7 | N | 1.45011   | 1.080308  | 0.000235  |
| 6 | C | 1.66376   | -0.285815 | 0.000118  |
| 7 | N | 0.715805  | -1.18359  | -0.000046 |
| 6 | C | -0.555457 | -0.694228 | -0.000117 |
| 6 | C | -0.868456 | 0.747481  | -0.000007 |
| 6 | C | 0.175291  | 1.63176   | 0.000174  |
| 7 | N | -2.237186 | 0.902129  | -0.000074 |
| 6 | C | -2.653076 | -0.378159 | -0.000377 |
| 7 | N | -1.70004  | -1.386114 | -0.000262 |
| 1 | H | 2.241095  | 1.714915  | 0.000377  |
| 1 | H | 0.110854  | 2.720361  | 0.000289  |
| 1 | H | -3.716263 | -0.627414 | -0.000417 |
| 8 | O | 2.951163  | -0.728762 | 0.000211  |
| 1 | H | 3.581813  | 0.006875  | 0.000343  |

C8-OH- PU\_1H  $E_{\text{tot}} = -486.936245$  a.u.  
Gibbs free energy  $E_G = -486.870299$  a.u.

|   |   |           |           |           |
|---|---|-----------|-----------|-----------|
| 7 | N | 2.433062  | 0.571228  | 0.000292  |
| 6 | C | 2.35179   | -0.79824  | 0.000195  |
| 7 | N | 1.221384  | -1.477302 | 0.000026  |
| 6 | C | 0.094466  | -0.719562 | 0.000003  |
| 6 | C | 0.103221  | 0.757321  | 0.000086  |
| 6 | C | 1.32388   | 1.394963  | 0.000223  |
| 7 | N | -1.185832 | 1.214283  | -0.000002 |
| 6 | C | -1.872151 | 0.054445  | 0.000089  |
| 7 | N | -1.179306 | -1.141177 | -0.000261 |
| 1 | H | 3.308545  | -1.325991 | 0.000236  |
| 1 | H | 3.355284  | 0.993577  | 0.000407  |
| 1 | H | 1.492209  | 2.472     | 0.000301  |
| 8 | O | -3.213202 | 0.054743  | -0.000512 |
| 1 | H | -3.482805 | -0.880324 | -0.000809 |

C2-OH- PU\_1H  $E_{\text{tot}} = -486.932603$  a.u.  
Gibbs free energy  $E_G = -486.867106$  a.u.

|   |   |           |           |           |
|---|---|-----------|-----------|-----------|
| 7 | N | 1.445227  | 1.107741  | 0.000181  |
| 6 | C | 1.665817  | -0.246305 | 0.000055  |
| 7 | N | 0.735701  | -1.167545 | -0.000047 |
| 6 | C | -0.545258 | -0.695288 | -0.000129 |
| 6 | C | -0.867215 | 0.744072  | 0.000017  |
| 6 | C | 0.167411  | 1.641913  | 0.000172  |
| 7 | N | -2.238354 | 0.885681  | 0.000182  |
| 6 | C | -2.644424 | -0.396369 | -0.000874 |
| 7 | N | -1.681975 | -1.397515 | 0.000039  |
| 1 | H | 2.255104  | 1.718536  | 0.000329  |
| 1 | H | 0.086747  | 2.72923   | 0.000342  |
| 1 | H | -3.705263 | -0.65503  | -0.000406 |
| 8 | O | 2.982771  | -0.567393 | 0.000206  |
| 1 | H | 3.019074  | -1.540268 | 0.000161  |

| C8-NH <sub>2</sub> - PU_1H          |   |           |           | C2-NH <sub>2</sub> - PU_1H          |   |   |           |           |           |
|-------------------------------------|---|-----------|-----------|-------------------------------------|---|---|-----------|-----------|-----------|
| E <sub>tot</sub> = -467.078817 a.u. |   |           |           | E <sub>tot</sub> = -467.067709 a.u. |   |   |           |           |           |
| Gibbs free energy                   |   |           |           | Gibbs free energy                   |   |   |           |           |           |
| E <sub>G</sub> = -467.001666 a.u.   |   |           |           | E <sub>G</sub> = -466.990713 a.u.   |   |   |           |           |           |
| 7                                   | N | -2.44375  | 0.589642  | 0.00269                             | 7 | N | -1.420004 | 1.118265  | -0.016349 |
| 6                                   | C | -2.376093 | -0.778511 | 0.003045                            | 6 | C | -1.670248 | -0.241475 | -0.000483 |
| 7                                   | N | -1.25264  | -1.47066  | 0.000977                            | 7 | N | -0.725396 | -1.160614 | 0.007226  |
| 6                                   | C | -0.115094 | -0.725487 | -0.002372                           | 6 | C | 0.552851  | -0.692938 | -0.006119 |
| 6                                   | C | -0.108136 | 0.753059  | -0.002081                           | 6 | C | 0.889767  | 0.74198   | 0.008474  |
| 6                                   | C | -1.323059 | 1.403812  | 0.000475                            | 6 | C | -0.139592 | 1.644722  | -0.002758 |
| 7                                   | N | 1.184199  | 1.189835  | -0.000814                           | 7 | N | 2.261762  | 0.874018  | 0.017874  |
| 6                                   | C | 1.87207   | 0.015061  | -0.003665                           | 6 | C | 2.656802  | -0.412734 | 0.004088  |
| 7                                   | N | 1.148643  | -1.168223 | -0.003138                           | 7 | N | 1.687803  | -1.404535 | -0.009559 |
| 1                                   | H | -3.33813  | -1.297005 | 0.005342                            | 1 | H | -2.206264 | 1.751352  | -0.110466 |
| 1                                   | H | -3.361071 | 1.021617  | 0.004038                            | 1 | H | -0.051636 | 2.731866  | -0.007669 |
| 1                                   | H | -1.483021 | 2.48196   | 0.00082                             | 1 | H | 3.716008  | -0.679296 | 0.00392   |
| 7                                   | N | 3.230244  | -0.019373 | -0.039668                           | 7 | N | -3.010703 | -0.614643 | -0.069347 |
| 1                                   | H | 3.731798  | 0.838697  | 0.145314                            | 1 | H | -3.1069   | -1.621003 | 0.040545  |
| 1                                   | H | 3.685413  | -0.901424 | 0.151735                            | 1 | H | -3.642923 | -0.107697 | 0.54553   |

**Table S16.** Values of total energies and Gibbs free energies, cartesian coordinates of equilibrium geometries of NX substituted purine (PU) 9H, 7H, 3H and 1H tautomers.

| N9-NO <sub>2</sub> - PU_9H          |   |          |          | N7-NO <sub>2</sub> - PU_7H          |   |   |          |          |          |
|-------------------------------------|---|----------|----------|-------------------------------------|---|---|----------|----------|----------|
| E <sub>tot</sub> = -616.134907 a.u. |   |          |          | E <sub>tot</sub> = -616.137609 a.u. |   |   |          |          |          |
| Gibbs free energy                   |   |          |          | Gibbs free energy                   |   |   |          |          |          |
| E <sub>G</sub> = -616.076861 a.u.   |   |          |          | E <sub>G</sub> = -616.078701 a.u.   |   |   |          |          |          |
| 7                                   | N | -3.03509 | -0.44948 | -0.0002                             | 7 | N | -2.28333 | -1.52189 | -0.00007 |
| 6                                   | C | -2.17337 | -1.48916 | -0.00037                            | 6 | C | -2.96115 | -0.35174 | -0.0002  |
| 7                                   | N | -0.82136 | -1.4556  | -0.00024                            | 7 | N | -2.46228 | 0.89968  | -0.00027 |
| 6                                   | C | -0.3507  | -0.21251 | 0.000043                            | 6 | C | -1.12684 | 0.945111 | 0.000016 |
| 6                                   | C | -1.13088 | 0.974354 | 0.000235                            | 6 | C | -0.31652 | -0.22572 | 0.000422 |
| 6                                   | C | -2.51907 | 0.794221 | 0.000208                            | 6 | C | -0.93815 | -1.4765  | 0.00033  |
| 7                                   | N | -0.32518 | 2.121217 | 0.000251                            | 7 | N | 0.987502 | 0.280011 | 0.000696 |
| 6                                   | C | 0.906596 | 1.675697 | -8E-06                              | 6 | C | 0.900854 | 1.68316  | 0.000156 |
| 7                                   | N | 0.971735 | 0.269562 | 0.000088                            | 7 | N | -0.33804 | 2.1064   | -0.0002  |
| 1                                   | H | -2.62143 | -2.48709 | -0.00075                            | 1 | H | -4.05232 | -0.43439 | -0.00044 |
| 1                                   | H | 1.816901 | 2.268613 | -7.8E-05                            | 1 | H | 1.801955 | 2.290814 | 0.000187 |
| 1                                   | H | -3.2146  | 1.64029  | 0.00022                             | 1 | H | -0.38821 | -2.41952 | 0.000324 |
| 7                                   | N | 2.21308  | -0.48359 | 0.000015                            | 7 | N | 2.209212 | -0.47021 | -5.4E-05 |
| 8                                   | O | 2.102086 | -1.69077 | 0.000965                            | 8 | O | 2.076692 | -1.68407 | -0.00032 |
| 8                                   | O | 3.223075 | 0.204243 | -0.0009                             | 8 | O | 3.235541 | 0.191485 | -0.00032 |

|                   |   |          |          |                                     |   |   |          |                   |          |  |  |                                     |  |  |  |
|-------------------|---|----------|----------|-------------------------------------|---|---|----------|-------------------|----------|--|--|-------------------------------------|--|--|--|
| N9-CN- PU_9H      |   |          |          | E <sub>tot</sub> = -503.905930 a.u. |   |   |          | N7-CN- PU_7H      |          |  |  | E <sub>tot</sub> = -503.902987 a.u. |  |  |  |
| Gibbs free energy |   |          |          | E <sub>G</sub> = -503.848773 a.u.   |   |   |          | Gibbs free energy |          |  |  | E <sub>G</sub> = -503.845936 a.u.   |  |  |  |
| 7                 | N | 2.711185 | -0.49264 | -0.0002                             | 7 | N | -1.97322 | -1.57119          | 0.000239 |  |  |                                     |  |  |  |
| 6                 | C | 1.854541 | -1.53745 | 0.000417                            | 6 | C | -2.64684 | -0.39544          | 0.000678 |  |  |                                     |  |  |  |
| 7                 | N | 0.502193 | -1.50214 | 0.00008                             | 7 | N | -2.14725 | 0.854702          | -0.00012 |  |  |                                     |  |  |  |
| 6                 | C | 0.04102  | -0.25871 | 0.000068                            | 6 | C | -0.80921 | 0.897519          | -0.00014 |  |  |                                     |  |  |  |
| 6                 | C | 0.807555 | 0.931992 | -2.7E-05                            | 6 | C | -0.01222 | -0.27661          | 0.000049 |  |  |                                     |  |  |  |
| 6                 | C | 2.19741  | 0.752092 | -0.00033                            | 6 | C | -0.62875 | -1.52577          | 0.000182 |  |  |                                     |  |  |  |
| 7                 | N | -0.01706 | 2.062649 | 0.000579                            | 7 | N | 1.31614  | 0.189068          | -0.00018 |  |  |                                     |  |  |  |
| 6                 | C | -1.23928 | 1.600189 | -0.00044                            | 6 | C | 1.226464 | 1.604986          | 0.000286 |  |  |                                     |  |  |  |
| 7                 | N | -1.29892 | 0.179944 | 0.000133                            | 7 | N | -0.00426 | 2.042777          | -0.00078 |  |  |                                     |  |  |  |
| 1                 | H | 2.306094 | -2.53354 | -0.00079                            | 1 | H | -3.73802 | -0.47686          | -0.00092 |  |  |                                     |  |  |  |
| 1                 | H | -2.15992 | 2.180734 | -0.00057                            | 1 | H | 2.135154 | 2.204474          | 0.000302 |  |  |                                     |  |  |  |
| 1                 | H | 2.895665 | 1.595636 | -0.00022                            | 1 | H | -0.07737 | -2.47197          | 0.000191 |  |  |                                     |  |  |  |
| 6                 | C | -2.41303 | -0.57653 | 0.00004                             | 6 | C | 2.438779 | -0.55155          | -0.00019 |  |  |                                     |  |  |  |
| 7                 | N | -3.40185 | -1.20673 | -0.00013                            | 7 | N | 3.418715 | -1.19742          | 0.000151 |  |  |                                     |  |  |  |
|                   |   |          |          |                                     |   |   |          |                   |          |  |  |                                     |  |  |  |
| N9-CHO- PU_9H     |   |          |          | E <sub>tot</sub> = -525.017987 a.u. |   |   |          | N7-CHO- PU_7H     |          |  |  | E <sub>tot</sub> = -525.012837 a.u. |  |  |  |
| Gibbs free energy |   |          |          | E <sub>G</sub> = -524.949910 a.u.   |   |   |          | Gibbs free energy |          |  |  | E <sub>G</sub> = -524.945000 a.u.   |  |  |  |
| 7                 | N | -2.84998 | -0.27953 | 0.00008                             | 7 | N | -2.2512  | -1.40624          | -0.00012 |  |  |                                     |  |  |  |
| 6                 | C | -2.09967 | -1.40133 | -0.00025                            | 6 | C | -2.78737 | -0.1637           | 0.00008  |  |  |                                     |  |  |  |
| 7                 | N | -0.74964 | -1.49937 | -5.6E-05                            | 7 | N | -2.1474  | 1.021497          | 0.000005 |  |  |                                     |  |  |  |
| 6                 | C | -0.16303 | -0.30511 | -2E-06                              | 6 | C | -0.81407 | 0.909777          | -0.00013 |  |  |                                     |  |  |  |
| 6                 | C | -0.81661 | 0.951705 | -1.4E-05                            | 6 | C | -0.14466 | -0.34442          | -0.00001 |  |  |                                     |  |  |  |
| 6                 | C | -2.21566 | 0.910699 | 0.000034                            | 6 | C | -0.90865 | -1.51048          | -0.00013 |  |  |                                     |  |  |  |
| 7                 | N | 0.120609 | 1.995267 | 0.000416                            | 7 | N | 1.224542 | -0.02706          | 0.0001   |  |  |                                     |  |  |  |
| 6                 | C | 1.290848 | 1.402654 | -0.00056                            | 6 | C | 1.287745 | 1.380942          | -0.00047 |  |  |                                     |  |  |  |
| 7                 | N | 1.20841  | -0.00571 | -8.2E-05                            | 7 | N | 0.11308  | 1.961633          | 0.000434 |  |  |                                     |  |  |  |
| 1                 | H | -2.64675 | -2.34858 | 0.000292                            | 1 | H | -3.88091 | -0.12029          | -6.4E-05 |  |  |                                     |  |  |  |
| 1                 | H | 2.262306 | 1.891491 | -0.00076                            | 1 | H | 2.254284 | 1.879809          | -0.00051 |  |  |                                     |  |  |  |
| 1                 | H | -2.82981 | 1.817351 | 0.000354                            | 1 | H | -0.48213 | -2.51954          | -0.00016 |  |  |                                     |  |  |  |
| 6                 | C | 2.27873  | -0.92579 | 0.000101                            | 6 | C | 2.320547 | -0.90851          | 0.000509 |  |  |                                     |  |  |  |
| 8                 | O | 3.442969 | -0.58227 | 0.00016                             | 8 | O | 3.476236 | -0.53713          | -0.00026 |  |  |                                     |  |  |  |
| 1                 | H | 1.917104 | -1.97375 | 0.000477                            | 1 | H | 2.004444 | -1.97347          | 0.000747 |  |  |                                     |  |  |  |
|                   |   |          |          |                                     |   |   |          |                   |          |  |  |                                     |  |  |  |
| N9-CHO- PU_9H     |   |          |          | E <sub>tot</sub> = -525.011084 a.u. |   |   |          | N7-CHO- PU_7H     |          |  |  | E <sub>tot</sub> = -525.014519 a.u. |  |  |  |
| Gibbs free energy |   |          |          | E <sub>G</sub> = -524.943514 a.u.   |   |   |          | Gibbs free energy |          |  |  | E <sub>G</sub> = -524.946347 a.u.   |  |  |  |
| 7                 | N | 2.700881 | -0.5777  | -0.00015                            | 7 | N | -1.88575 | -1.6093           | -3.6E-05 |  |  |                                     |  |  |  |
| 6                 | C | 1.783474 | -1.57017 | 0.000297                            | 6 | C | -2.62641 | -0.47678          | 0.000327 |  |  |                                     |  |  |  |
| 7                 | N | 0.43605  | -1.46335 | 0.000196                            | 7 | N | -2.20093 | 0.801851          | -0.00001 |  |  |                                     |  |  |  |
| 6                 | C | 0.031895 | -0.19575 | 0.000109                            | 6 | C | -0.86826 | 0.918443          | -6E-06   |  |  |                                     |  |  |  |
| 6                 | C | 0.87661  | 0.944755 | -6.7E-05                            | 6 | C | 0.003922 | -0.20306          | -1.5E-05 |  |  |                                     |  |  |  |
| 6                 | C | 2.253697 | 0.692441 | -0.00027                            | 6 | C | -0.54437 | -1.4866           | -0.00009 |  |  |                                     |  |  |  |
| 7                 | N | 0.126027 | 2.129069 | 0.000128                            | 7 | N | 1.297238 | 0.342124          | -2.4E-05 |  |  |                                     |  |  |  |
| 6                 | C | -1.1207  | 1.729613 | 0.000014                            | 6 | C | 1.117992 | 1.740918          | 0.000238 |  |  |                                     |  |  |  |
| 7                 | N | -1.27719 | 0.326655 | 0.000171                            | 7 | N | -0.13539 | 2.116945          | -0.00025 |  |  |                                     |  |  |  |
| 1                 | H | 2.179069 | -2.59018 | -0.00027                            | 1 | H | -3.71146 | -0.62086          | -0.00058 |  |  |                                     |  |  |  |
| 1                 | H | -1.99378 | 2.381346 | 0.000046                            | 1 | H | 1.979837 | 2.407647          | 0.000273 |  |  |                                     |  |  |  |
| 1                 | H | 2.995233 | 1.498522 | -0.00034                            | 1 | H | 0.061619 | -2.39564          | -0.00014 |  |  |                                     |  |  |  |
| 6                 | C | -2.53034 | -0.33035 | -4.6E-05                            | 6 | C | 2.528699 | -0.32948          | -1E-06   |  |  |                                     |  |  |  |
| 8                 | O | -2.68583 | -1.5284  | -0.00025                            | 8 | O | 2.636016 | -1.53901          | 0.000015 |  |  |                                     |  |  |  |
| 1                 | H | -3.36208 | 0.411496 | -6.6E-05                            | 1 | H | 3.386315 | 0.378942          | -0.00012 |  |  |                                     |  |  |  |



N9-Cl- PU\_9H  $E_{\text{tot}} = -871.323437$  a.u.  
Gibbs free energy  $E_G = -871.274114$  a.u.

|    |    |          |          |          |
|----|----|----------|----------|----------|
| 7  | N  | 2.809599 | -0.45155 | 0.000055 |
| 6  | C  | 1.958755 | -1.50413 | -0.00022 |
| 7  | N  | 0.609271 | -1.48213 | 0.000049 |
| 6  | C  | 0.130818 | -0.2401  | 0.000031 |
| 6  | C  | 0.892761 | 0.960346 | -1.1E-05 |
| 6  | C  | 2.283875 | 0.787158 | 0.000142 |
| 7  | N  | 0.063297 | 2.084755 | -0.00049 |
| 6  | C  | -1.16247 | 1.600452 | 0.000399 |
| 7  | N  | -1.18279 | 0.205676 | 0.000188 |
| 1  | H  | 2.420456 | -2.49597 | 0.000452 |
| 1  | H  | -2.08944 | 2.170092 | 0.000536 |
| 1  | H  | 2.974554 | 1.637788 | -4.3E-05 |
| 17 | Cl | -2.58963 | -0.79009 | -9.3E-05 |

N7-Cl- PU\_7H  $E_{\text{tot}} = -871.320300$  a.u.  
Gibbs free energy  $E_G = -871.271340$  a.u.

|    |    |          |          |          |
|----|----|----------|----------|----------|
| 7  | N  | 2.088335 | -1.53647 | 0.000143 |
| 6  | C  | 2.750518 | -0.35108 | 0.000638 |
| 7  | N  | 2.237895 | 0.890598 | 0.000189 |
| 6  | C  | 0.896957 | 0.927437 | 0.0001   |
| 6  | C  | 0.108943 | -0.26158 | 0.000053 |
| 6  | C  | 0.745511 | -1.50349 | 0.000014 |
| 7  | N  | -1.19361 | 0.208775 | 0.000015 |
| 6  | C  | -1.15119 | 1.595261 | 0.000041 |
| 7  | N  | 0.086123 | 2.058283 | -0.00041 |
| 1  | H  | 3.842578 | -0.42197 | -0.00046 |
| 1  | H  | -2.06664 | 2.18334  | 0.000416 |
| 1  | H  | 0.203538 | -2.45517 | -0.00007 |
| 17 | Cl | -2.62442 | -0.77022 | -0.0004  |

N9-F- PU\_9H  $E_{\text{tot}} = -510.856023$  a.u.  
Gibbs free energy  $E_G = -510.804949$  a.u.

|   |   |          |          |          |
|---|---|----------|----------|----------|
| 7 | N | 2.537585 | 0.088479 | 0.000031 |
| 6 | C | 1.990566 | -1.1506  | 0.000089 |
| 7 | N | 0.683792 | -1.48618 | -8.8E-05 |
| 6 | C | -0.09942 | -0.40807 | -6.3E-05 |
| 6 | C | 0.318931 | 0.953534 | 0.000103 |
| 6 | C | 1.707849 | 1.147092 | 0.000131 |
| 7 | N | -0.76982 | 1.828008 | 0.000535 |
| 6 | C | -1.83541 | 1.047527 | -0.00048 |
| 7 | N | -1.47495 | -0.29019 | -0.0002  |
| 7 | H | 2.696313 | -1.98659 | -0.00044 |
| 1 | H | -2.87927 | 1.352446 | -0.00061 |
| 1 | H | 2.152681 | 2.14852  | 0.000315 |
| 9 | F | -2.36679 | -1.3369  | 0.000009 |

N7-F- PU\_7H  $E_{\text{tot}} = -510.854103$  a.u.  
Gibbs free energy  $E_G = -510.803556$  a.u.

|   |   |          |          |          |
|---|---|----------|----------|----------|
| 7 | N | -2.10207 | -1.17526 | -6.8E-05 |
| 6 | C | -2.45093 | 0.137951 | -0.00032 |
| 7 | N | -1.64747 | 1.213053 | -5.9E-05 |
| 6 | C | -0.33826 | 0.921031 | -1.9E-05 |
| 6 | C | 0.129391 | -0.43109 | 0.000002 |
| 6 | C | -0.79554 | -1.47883 | 0.000059 |
| 7 | N | 1.494405 | -0.26652 | 0.000026 |
| 6 | C | 1.81355  | 1.072087 | -0.00032 |
| 7 | N | 0.720356 | 1.821715 | 0.000304 |
| 7 | H | -3.52654 | 0.338936 | 0.000201 |
| 1 | H | 2.84591  | 1.41391  | -0.00036 |
| 1 | H | -0.50644 | -2.5346  | 0.000079 |
| 9 | F | 2.420137 | -1.29956 | 0.000247 |

N9-H-PU\_9H  $E_{\text{tot}} = -411.741198$  a.u.  
Gibbs free energy  $E_G = -411.678769$  a.u.

|   |   |          |          |          |
|---|---|----------|----------|----------|
| 7 | N | 2.133176 | 0.656495 | 0.000257 |
| 6 | C | 2.020379 | -0.69113 | 0.000211 |
| 7 | N | 0.89314  | -1.43447 | 0.000044 |
| 6 | C | -0.20576 | -0.67547 | -4.3E-05 |
| 6 | C | -0.24493 | 0.747737 | 0.000004 |
| 6 | C | 1.001414 | 1.387556 | 0.000157 |
| 7 | N | -1.56412 | 1.203032 | -9.8E-05 |
| 6 | C | -2.29031 | 0.100127 | -0.0002  |
| 7 | N | -1.53258 | -1.06594 | -0.00028 |
| 1 | H | 1.099483 | 2.478907 | 0.000216 |
| 1 | H | -3.37889 | 0.065738 | -0.00032 |
| 1 | H | 2.960683 | -1.25118 | 0.000252 |
| 1 | H | -1.87332 | -2.02021 | -0.00041 |

N7-H-AD\_7H  $E_{\text{tot}} = -411.735954$  a.u.  
Gibbs free energy  $E_G = -411.673762$  a.u.

|   |   |          |          |          |
|---|---|----------|----------|----------|
| 7 | N | -2.12563 | 0.684039 | -0.00026 |
| 6 | C | -2.0303  | -0.66959 | -9.7E-05 |
| 7 | N | -0.92259 | -1.42993 | 0.000027 |
| 6 | C | 0.219001 | -0.72192 | 0.000092 |
| 6 | C | 0.234645 | 0.706284 | -5.1E-05 |
| 6 | C | -0.98209 | 1.390693 | -0.00022 |
| 7 | N | 1.579429 | 1.045547 | 0.000083 |
| 6 | C | 2.285114 | -0.14627 | 0.000431 |
| 7 | N | 1.516735 | -1.22169 | 0.000003 |
| 1 | H | -1.0606  | 2.484487 | -0.0003  |
| 1 | H | 3.374333 | -0.15507 | 0.000616 |
| 1 | H | -2.98376 | -1.20761 | -0.00027 |
| 1 | H | 1.97617  | 1.977259 | 0.000072 |

|                                     |   |          |          |                                     |   |   |          |          |          |
|-------------------------------------|---|----------|----------|-------------------------------------|---|---|----------|----------|----------|
| N9-Me- PU_9H                        |   |          |          | N7-Me- PU_7H                        |   |   |          |          |          |
| E <sub>tot</sub> = -451.030304 a.u. |   |          |          | E <sub>tot</sub> = -451.024895 a.u. |   |   |          |          |          |
| Gibbs free energy                   |   |          |          | Gibbs free energy                   |   |   |          |          |          |
| E <sub>G</sub> = -450.943859 a.u.   |   |          |          | E <sub>G</sub> = -450.937923 a.u.   |   |   |          |          |          |
| 7                                   | N | -2.55503 | -0.05808 | 0.000154                            | 7 | N | -2.04051 | -1.27589 | 0.000107 |
| 6                                   | C | -1.91621 | -1.25073 | -0.00017                            | 6 | C | -2.4762  | 0.00967  | 0.000192 |
| 7                                   | N | -0.58657 | -1.48419 | -0.00017                            | 7 | N | -1.75065 | 1.141135 | -0.00014 |
| 6                                   | C | 0.120613 | -0.34977 | -0.00015                            | 6 | C | -0.42377 | 0.93226  | -0.00011 |
| 6                                   | C | -0.40918 | 0.972117 | 0.000028                            | 6 | C | 0.143416 | -0.37949 | 0.000028 |
| 6                                   | C | -1.80717 | 1.063223 | 0.000231                            | 6 | C | -0.71133 | -1.48289 | 0.000108 |
| 7                                   | N | 0.623242 | 1.908045 | -0.00024                            | 7 | N | 1.516125 | -0.18712 | -2.7E-05 |
| 6                                   | C | 1.723629 | 1.173729 | 0.000124                            | 6 | C | 1.702906 | 1.185054 | 0.000078 |
| 7                                   | N | 1.494738 | -0.1977  | -0.00023                            | 7 | N | 0.581882 | 1.890138 | -0.00043 |
| 1                                   | H | -2.55774 | -2.13743 | 0.000242                            | 1 | H | -3.56371 | 0.135731 | -0.00039 |
| 1                                   | H | 2.739912 | 1.567163 | 0.000115                            | 1 | H | 2.70767  | 1.607782 | 0.000058 |
| 1                                   | H | -2.33134 | 2.025359 | 0.000236                            | 1 | H | -0.35798 | -2.52104 | 0.000187 |
| 6                                   | C | 2.477373 | -1.27458 | 0.00023                             | 6 | C | 2.53953  | -1.22273 | 0.000179 |
| 1                                   | H | 2.349174 | -1.90076 | 0.895872                            | 1 | H | 2.445574 | -1.85388 | 0.898459 |
| 1                                   | H | 2.348364 | -1.90221 | -0.89427                            | 1 | H | 2.445482 | -1.85436 | -0.89775 |
| 1                                   | H | 3.482629 | -0.83262 | -0.00059                            | 1 | H | 3.527763 | -0.74332 | -5E-06   |
| N9-OMe-PU_9H                        |   |          |          | N7-OMe- PU_7H                       |   |   |          |          |          |
| E <sub>tot</sub> = -526.152929 a.u. |   |          |          | E <sub>tot</sub> = -526.143533 a.u. |   |   |          |          |          |
| Gibbs free energy                   |   |          |          | Gibbs free energy                   |   |   |          |          |          |
| E <sub>G</sub> = -526.06453 a.u.    |   |          |          | E <sub>G</sub> = -526.053804 a.u.   |   |   |          |          |          |
| 7                                   | N | 2.754488 | -0.58466 | 0.113884                            | 7 | N | 2.320222 | -1.41318 | 0.000512 |
| 6                                   | C | 1.851843 | -1.57062 | -0.09667                            | 6 | C | 2.861286 | -0.16541 | 0.001195 |
| 7                                   | N | 0.513534 | -1.46141 | -0.23577                            | 7 | N | 2.23157  | 1.01935  | 0.001021 |
| 6                                   | C | 0.107819 | -0.19193 | -0.14963                            | 6 | C | 0.890334 | 0.923883 | 0.000029 |
| 6                                   | C | 0.932269 | 0.947993 | 0.072354                            | 6 | C | 0.223638 | -0.34033 | -0.00073 |
| 6                                   | C | 2.301804 | 0.680981 | 0.201876                            | 6 | C | 0.981755 | -1.51435 | -0.0005  |
| 7                                   | N | 0.173181 | 2.118408 | 0.110824                            | 7 | N | -1.11538 | -0.01189 | -0.00151 |
| 6                                   | C | -1.0717  | 1.712044 | -0.07136                            | 6 | C | -1.21537 | 1.368164 | -0.00137 |
| 7                                   | N | -1.17018 | 0.335562 | -0.22691                            | 7 | N | -0.02471 | 1.9624   | -0.00034 |
| 7                                   | H | 2.256713 | -2.58526 | -0.16048                            | 1 | H | 3.955406 | -0.12994 | 0.001972 |
| 1                                   | H | -1.95964 | 2.33958  | -0.11584                            | 1 | H | -2.1708  | 1.884154 | -0.00191 |
| 1                                   | H | 3.03621  | 1.475431 | 0.375536                            | 1 | H | 0.537729 | -2.51504 | -0.00105 |
| 1                                   | O | -2.33329 | -0.33761 | -0.53752                            | 8 | O | -2.10065 | -1.00391 | -0.00353 |
| 8                                   | C | -2.76995 | -1.14119 | 0.596549                            | 6 | C | -3.42659 | -0.45084 | 0.00383  |
| 6                                   | H | -3.70707 | -1.60103 | 0.256049                            | 1 | H | -3.60894 | 0.15342  | -0.90182 |
| 1                                   | H | -2.01924 | -1.91299 | 0.821701                            | 1 | H | -4.07936 | -1.33249 | 0.003685 |
| 1                                   | H | -2.95027 | -0.4938  | 1.470306                            | 1 | H | -3.6011  | 0.147633 | 0.91485  |

| N7-OMe- PU_7H     |   | E <sub>tot</sub> = -526.141230 a.u. |          |          |
|-------------------|---|-------------------------------------|----------|----------|
| Gibbs free energy |   | E <sub>G</sub> = -526.051497 a.u.   |          |          |
| 7                 | N | 1.860871                            | -1.67661 | 0.000442 |
| 6                 | C | 2.660919                            | -0.5801  | 0.000523 |
| 7                 | N | 2.295189                            | 0.708238 | 0.000191 |
| 6                 | C | 0.967221                            | 0.908559 | 0.000017 |
| 6                 | C | 0.023807                            | -0.18039 | 0.000033 |
| 6                 | C | 0.533469                            | -1.48837 | 0.000222 |
| 7                 | N | -1.20341                            | 0.473071 | 0.00006  |
| 6                 | C | -0.96739                            | 1.827938 | -0.00044 |
| 7                 | N | 0.324313                            | 2.131129 | 0.000117 |
| 1                 | H | 3.736877                            | -0.78066 | 0.000296 |
| 1                 | H | -1.79688                            | 2.531867 | -0.00055 |
| 1                 | H | -0.08894                            | -2.38659 | 0.000437 |
| 8                 | O | -2.52773                            | 0.011744 | 0.000376 |
| 6                 | C | -2.63253                            | -1.42164 | -0.0011  |
| 1                 | H | -2.18269                            | -1.85348 | 0.907794 |
| 1                 | H | -3.71548                            | -1.60033 | -0.00121 |
| 1                 | H | -2.18281                            | -1.85157 | -0.91095 |

| N9-OH- PU_9H      |   | E <sub>tot</sub> = -486.872939 a.u. |          |          |
|-------------------|---|-------------------------------------|----------|----------|
| Gibbs free energy |   | E <sub>G</sub> = -486.809613 a.u.   |          |          |
| 7                 | N | 2.523059                            | 0.043752 | 0        |
| 6                 | C | 1.945214                            | -1.17992 | -8E-06   |
| 7                 | N | 0.626196                            | -1.47137 | -3.6E-05 |
| 6                 | C | -0.11607                            | -0.36252 | -5.8E-05 |
| 6                 | C | 0.33466                             | 0.986924 | 0.000007 |
| 6                 | C | 1.72923                             | 1.133963 | 0.000049 |
| 7                 | N | -0.74643                            | 1.863983 | 0.000003 |
| 6                 | C | -1.8189                             | 1.080363 | 0.000005 |
| 7                 | N | -1.4847                             | -0.26158 | -1.2E-05 |
| 1                 | H | 2.626979                            | -2.03537 | -4.6E-05 |
| 1                 | H | -2.85748                            | 1.40303  | 0.000004 |
| 1                 | H | 2.214938                            | 2.115979 | 0.000035 |
| 8                 | O | -2.38248                            | -1.3195  | -0.00007 |
| 1                 | H | -1.79636                            | -2.10405 | 0.000912 |

| N7-OH- PU_7H      |   | E <sub>tot</sub> = -486.868409 a.u. |          |          |
|-------------------|---|-------------------------------------|----------|----------|
| Gibbs free energy |   | E <sub>G</sub> = -486.805107 a.u.   |          |          |
| 7                 | N | 2.082536                            | -1.20873 | -0.00765 |
| 6                 | C | 2.459118                            | 0.095706 | 0.003501 |
| 7                 | N | 1.680988                            | 1.190874 | 0.008534 |
| 6                 | C | 0.36549                             | 0.923323 | 0.004628 |
| 6                 | C | -0.13507                            | -0.41465 | 0.003122 |
| 6                 | C | 0.766407                            | -1.48023 | -0.0078  |
| 7                 | N | -1.50874                            | -0.25005 | 0.021732 |
| 6                 | C | -1.77707                            | 1.105881 | -0.0063  |
| 7                 | N | -0.6777                             | 1.843183 | -0.00247 |
| 1                 | H | 3.539284                            | 0.272475 | 0.006439 |
| 1                 | H | -2.80238                            | 1.471079 | -0.02563 |
| 1                 | H | 0.455916                            | -2.53049 | -0.02358 |
| 8                 | O | -2.45825                            | -1.25793 | -0.11019 |
| 1                 | H | -2.63964                            | -1.55678 | 0.800296 |

| N7-OH- PU_7H      |   | E <sub>tot</sub> = -486.863033 a.u. |          |          |
|-------------------|---|-------------------------------------|----------|----------|
| Gibbs free energy |   | E <sub>G</sub> = -486.800056 a.u.   |          |          |
| 7                 | N | -2.08042                            | -1.20465 | -4.8E-05 |
| 6                 | C | -2.45583                            | 0.101332 | -0.00057 |
| 7                 | N | -1.6771                             | 1.194777 | -0.00023 |
| 6                 | C | -0.36038                            | 0.932037 | -9.8E-05 |
| 6                 | C | 0.139726                            | -0.41202 | 0.00003  |
| 6                 | C | -0.76552                            | -1.47607 | 0.000124 |
| 7                 | N | 1.508596                            | -0.2453  | 0.000047 |
| 6                 | C | 1.781922                            | 1.101793 | -0.00035 |
| 7                 | N | 0.679622                            | 1.845055 | 0.000409 |
| 1                 | H | -3.5359                             | 0.277748 | 0.000316 |
| 1                 | H | 2.80745                             | 1.464916 | -0.00033 |
| 1                 | H | -0.46853                            | -2.53252 | 0.000289 |
| 8                 | O | 2.513027                            | -1.21923 | 0.000494 |
| 1                 | H | 2.038374                            | -2.06798 | -0.00033 |

N9-NH<sub>2</sub>- PU\_9H E<sub>tot</sub> = -467.033124 a.u.  
 Gibbs free energy E<sub>G</sub> = -466.956984 a.u.

|   |   |          |          |          |
|---|---|----------|----------|----------|
| 7 | N | -2.55977 | 0.000158 | -7.8E-05 |
| 6 | C | -1.95688 | -1.21238 | 0.000259 |
| 7 | N | -0.63701 | -1.49099 | 0.000017 |
| 6 | C | 0.108928 | -0.38424 | 0.000024 |
| 6 | C | -0.37945 | 0.95263  | -5E-06   |
| 6 | C | -1.77335 | 1.093033 | -0.00018 |
| 7 | N | 0.673936 | 1.86926  | 0.000386 |
| 6 | C | 1.758014 | 1.118234 | -0.0003  |
| 7 | N | 1.492011 | -0.25282 | -0.00014 |
| 1 | H | -2.62661 | -2.07814 | -0.00043 |
| 1 | H | 2.78583  | 1.481794 | -0.00041 |
| 1 | H | -2.26034 | 2.074629 | -7.6E-05 |
| 7 | N | 2.398944 | -1.32127 | 0.000175 |
| 1 | H | 2.989935 | -1.25682 | -0.83082 |
| 1 | H | 2.990838 | -1.25558 | 0.830421 |

N7-NH<sub>2</sub>- PU\_7H E<sub>tot</sub> = -467.031592 a.u.  
 Gibbs free energy E<sub>G</sub> = -466.955304 a.u.

|   |   |          |          |          |
|---|---|----------|----------|----------|
| 7 | N | -2.06876 | -1.23992 | -4.4E-05 |
| 6 | C | -2.47113 | 0.05698  | -0.00047 |
| 7 | N | -1.71559 | 1.168069 | -0.00011 |
| 6 | C | -0.39498 | 0.921898 | -4.6E-05 |
| 6 | C | 0.13426  | -0.40174 | -2E-06   |
| 6 | C | -0.74659 | -1.48454 | 0.000049 |
| 7 | N | 1.510939 | -0.23413 | 0.000033 |
| 6 | C | 1.740464 | 1.136477 | -0.00033 |
| 7 | N | 0.634201 | 1.860052 | 0.000354 |
| 1 | H | -3.55485 | 0.211959 | 0.000457 |
| 1 | H | 2.757392 | 1.529885 | -0.00036 |
| 1 | H | -0.41048 | -2.52655 | 0.000131 |
| 7 | N | 2.43607  | -1.29153 | 0.000337 |
| 1 | H | 3.028833 | -1.21395 | -0.82897 |
| 1 | H | 3.028888 | -1.21352 | 0.829568 |

N3-NO<sub>2</sub>- PU\_3H E<sub>tot</sub> = -616.117010 a.u.  
 Gibbs free energy E<sub>G</sub> = -616.058258 a.u.

|   |   |          |          |          |
|---|---|----------|----------|----------|
| 7 | N | -0.34809 | 2.373466 | 0.000179 |
| 6 | C | 0.739387 | 1.629408 | 0.000201 |
| 7 | N | 0.726203 | 0.255127 | 0.000199 |
| 6 | C | -0.46055 | -0.43268 | 0.000151 |
| 6 | C | -1.68192 | 0.383958 | 0.000124 |
| 6 | C | -1.57247 | 1.762835 | 0.00013  |
| 7 | N | -2.74773 | -0.48447 | -9.1E-05 |
| 6 | C | -2.154   | -1.68542 | 0.000575 |
| 7 | N | -0.75972 | -1.72892 | 0.000119 |
| 1 | H | 1.726339 | 2.089856 | 0.000215 |
| 1 | H | -2.72429 | -2.61544 | 0.000339 |
| 1 | H | -2.4466  | 2.420171 | -1.4E-05 |
| 7 | N | 2.135671 | -0.4869  | 0.000067 |
| 8 | O | 2.06469  | -1.68256 | -0.00095 |
| 8 | O | 3.0825   | 0.264903 | -0.00042 |

N1-NO<sub>2</sub>- PU\_1H E<sub>tot</sub> = -616.120089 a.u.  
 Gibbs free energy E<sub>G</sub> = -616.061928 a.u.

|   |   |          |          |          |
|---|---|----------|----------|----------|
| 7 | N | 1.04705  | 0.057802 | -0.00015 |
| 6 | C | 0.635688 | 1.388564 | -2.5E-05 |
| 7 | N | -0.62326 | 1.748897 | 0.000165 |
| 6 | C | -1.53656 | 0.733598 | 0.000236 |
| 6 | C | -1.15379 | -0.68824 | 0.000112 |
| 6 | C | 0.178547 | -1.01567 | -8.3E-05 |
| 7 | N | -2.29706 | -1.45316 | 0.000244 |
| 6 | C | -3.25569 | -0.50881 | 0.000375 |
| 7 | N | -2.86802 | 0.827176 | 0.000432 |
| 1 | H | 1.439147 | 2.122864 | -9.6E-05 |
| 1 | H | -4.31462 | -0.7742  | 0.000536 |
| 1 | H | 0.612911 | -2.01337 | -0.00019 |
| 7 | N | 2.528665 | -0.23668 | -0.00036 |
| 8 | O | 2.818419 | -1.41379 | -0.00041 |
| 8 | O | 3.249297 | 0.738768 | -0.00038 |

N3-CN- PU\_3H E<sub>tot</sub> = -503.884158 a.u.  
 Gibbs free energy E<sub>G</sub> = -503.827426 a.u.

|   |   |          |          |          |
|---|---|----------|----------|----------|
| 7 | N | 0.109033 | 2.292427 | -8.4E-05 |
| 6 | C | 1.149605 | 1.506368 | 0.000095 |
| 7 | N | 1.072742 | 0.102319 | 0.000106 |
| 6 | C | -0.18667 | -0.47977 | 0.000037 |
| 6 | C | -1.35057 | 0.394688 | -0.00013 |
| 6 | C | -1.16005 | 1.763501 | -0.00033 |
| 7 | N | -2.46128 | -0.42412 | 0.000774 |
| 6 | C | -1.92293 | -1.65128 | 0.000362 |
| 7 | N | -0.52557 | -1.75579 | -0.00062 |
| 1 | H | 2.166129 | 1.904287 | -2.4E-05 |
| 1 | H | -2.53485 | -2.55422 | 0.000153 |
| 1 | H | -1.98663 | 2.47918  | 0.000188 |
| 6 | C | 2.211316 | -0.64484 | -5.2E-05 |
| 7 | N | 3.220951 | -1.23788 | -0.00021 |

N1-CN- PU\_1H E<sub>tot</sub> = -503.882294 a.u.  
 Gibbs free energy E<sub>G</sub> = -503.825574 a.u.

|   |   |          |          |          |
|---|---|----------|----------|----------|
| 7 | N | 1.432611 | -0.0258  | -0.00019 |
| 6 | C | 1.021369 | 1.328048 | -6.3E-05 |
| 7 | N | -0.22205 | 1.711225 | 0.000128 |
| 6 | C | -1.15823 | 0.716843 | 0.000204 |
| 6 | C | -0.80873 | -0.71613 | 0.000064 |
| 6 | C | 0.50977  | -1.07972 | -0.00013 |
| 7 | N | -1.97133 | -1.45084 | 0.000223 |
| 6 | C | -2.90626 | -0.48327 | 0.000322 |
| 7 | N | -2.48572 | 0.841911 | 0.000352 |
| 1 | H | 1.846041 | 2.043521 | -0.00013 |
| 1 | H | -3.97127 | -0.72255 | 0.000468 |
| 1 | H | 0.918791 | -2.09005 | -0.00023 |
| 6 | C | 2.762795 | -0.29786 | -0.00038 |
| 7 | N | 3.915358 | -0.51056 | -0.00054 |

|                                                   |    |          |          |                                                   |    |    |          |          |          |
|---------------------------------------------------|----|----------|----------|---------------------------------------------------|----|----|----------|----------|----------|
| N3-CHO- PU_3H $E_{\text{tot}} = -524.989977$ a.u. |    |          |          | N1-CHO- PU_1H $E_{\text{tot}} = -524.996050$ a.u. |    |    |          |          |          |
| Gibbs free energy $E_G = -524.922834$ a.u.        |    |          |          | Gibbs free energy $E_G = -524.928256$ a.u.        |    |    |          |          |          |
| 7                                                 | N  | -0.23901 | 2.364611 | -8.8E-05                                          | 7  | N  | -1.38263 | 0.198685 | 0.000154 |
| 6                                                 | C  | 0.895032 | 1.712687 | -0.00017                                          | 6  | C  | -0.84681 | 1.492327 | 0.000044 |
| 7                                                 | N  | 1.03607  | 0.326184 | -7.6E-05                                          | 7  | N  | 0.426391 | 1.779464 | -0.00013 |
| 6                                                 | C  | -0.12367 | -0.43283 | 0.00005                                           | 6  | C  | 1.266774 | 0.700302 | -0.0002  |
| 6                                                 | C  | -1.40403 | 0.272238 | 0.000122                                          | 6  | C  | 0.781797 | -0.69349 | -8.8E-05 |
| 6                                                 | C  | -1.41654 | 1.652586 | 0.000051                                          | 6  | C  | -0.56664 | -0.92737 | 0.00009  |
| 7                                                 | N  | -2.39775 | -0.68434 | 0.00058                                           | 7  | N  | 1.872832 | -1.53447 | -0.00021 |
| 6                                                 | C  | -1.69966 | -1.82759 | -0.00045                                          | 6  | C  | 2.893448 | -0.66057 | -0.00037 |
| 7                                                 | N  | -0.30297 | -1.74651 | 0.000246                                          | 7  | N  | 2.599691 | 0.700903 | -0.00033 |
| 1                                                 | H  | 1.83612  | 2.268766 | -0.00025                                          | 1  | H  | -1.59114 | 2.293146 | 0.000114 |
| 1                                                 | H  | -2.18564 | -2.80449 | 0.000085                                          | 1  | H  | 3.931874 | -0.99772 | -0.00046 |
| 1                                                 | H  | -2.3407  | 2.237334 | 0.000224                                          | 1  | H  | -1.07531 | -1.89128 | 0.00018  |
| 6                                                 | C  | 2.37697  | -0.2152  | -0.00011                                          | 6  | C  | -2.80558 | 0.048058 | 0.000332 |
| 8                                                 | O  | 2.640104 | -1.38752 | -0.00018                                          | 8  | O  | -3.36167 | -1.02515 | 0.000557 |
| 1                                                 | H  | 3.126358 | 0.60757  | -0.00025                                          | 1  | H  | -3.32406 | 1.029396 | 0.00048  |
| N3-CHO- PU_3H $E_{\text{tot}} = -524.998093$ a.u. |    |          |          | N1-CHO- PU_1H $E_{\text{tot}} = -524.995159$ a.u. |    |    |          |          |          |
| Gibbs free energy $E_G = -524.930545$ a.u.        |    |          |          | Gibbs free energy $E_G = -524.927547$ a.u.        |    |    |          |          |          |
| 7                                                 | N  | 0.343274 | 2.208838 | 0.000014                                          | 7  | N  | -1.34593 | -0.21817 | 0.000198 |
| 6                                                 | C  | 1.255045 | 1.266158 | -0.00019                                          | 6  | C  | -1.05368 | 1.152846 | 0.000066 |
| 7                                                 | N  | 0.979738 | -0.09619 | -0.00014                                          | 7  | N  | 0.153484 | 1.653318 | -0.00012 |
| 6                                                 | C  | -0.34619 | -0.48588 | 0.000016                                          | 6  | C  | 1.173393 | 0.743744 | -0.0002  |
| 6                                                 | C  | -1.37791 | 0.538466 | 0.000233                                          | 6  | C  | 0.9497   | -0.71264 | -6.5E-05 |
| 6                                                 | C  | -0.98888 | 1.865134 | 0.000311                                          | 6  | C  | -0.33682 | -1.17572 | 0.000134 |
| 7                                                 | N  | -2.59599 | -0.11238 | 0.000065                                          | 7  | N  | 2.173361 | -1.34551 | -0.0002  |
| 6                                                 | C  | -2.23859 | -1.40317 | -0.00032                                          | 6  | C  | 3.020458 | -0.3014  | -0.00038 |
| 7                                                 | N  | -0.87171 | -1.70492 | 0.000464                                          | 7  | N  | 2.486198 | 0.983196 | -0.00035 |
| 1                                                 | H  | 2.317097 | 1.514099 | -0.00023                                          | 1  | N  | -1.93497 | 1.794801 | 0.000137 |
| 1                                                 | H  | -2.97363 | -2.20929 | 0.000098                                          | 1  | H  | 4.102495 | -0.44658 | -0.00049 |
| 1                                                 | H  | -1.70433 | 2.692572 | 0.000193                                          | 1  | H  | -0.64623 | -2.22319 | 0.000239 |
| 6                                                 | C  | 2.041186 | -1.078   | -0.00014                                          | 6  | C  | -2.7113  | -0.65173 | 0.000403 |
| 8                                                 | O  | 3.209387 | -0.77191 | -0.00029                                          | 8  | O  | -3.65724 | 0.099456 | 0.000404 |
| 1                                                 | H  | 1.630592 | -2.1058  | -3.6E-05                                          | 1  | H  | -2.78362 | -1.76111 | 0.000417 |
| N3-Cl- PU_3H $E_{\text{tot}} = -871.312447$ a.u.  |    |          |          | N1-Cl- PU_1H $E_{\text{tot}} = -871.305480$ a.u.  |    |    |          |          |          |
| Gibbs free energy $E_G = -871.263308$ a.u.        |    |          |          | Gibbs free energy $E_G = -871.256569$ a.u.        |    |    |          |          |          |
| 7                                                 | N  | 0.008437 | 2.317039 | -0.00015                                          | 7  | N  | 1.292863 | 0.008534 | -0.00015 |
| 6                                                 | C  | 1.059333 | 1.520998 | -0.00011                                          | 6  | C  | 0.910976 | 1.33877  | -3.6E-05 |
| 7                                                 | N  | 0.953657 | 0.151991 | -4E-06                                            | 7  | N  | -0.34706 | 1.712556 | 0.000132 |
| 6                                                 | C  | -0.26434 | -0.45374 | 0.000052                                          | 6  | C  | -1.27926 | 0.723028 | 0.000203 |
| 6                                                 | C  | -1.44244 | 0.416952 | 0.000022                                          | 6  | C  | -0.92517 | -0.7034  | 0.000085 |
| 6                                                 | C  | -1.2476  | 1.791919 | -0.0001                                           | 6  | C  | 0.411337 | -1.04747 | -9.6E-05 |
| 7                                                 | N  | -2.54202 | -0.4037  | 0.000567                                          | 7  | N  | -2.07292 | -1.44736 | 0.000145 |
| 6                                                 | C  | -1.99838 | -1.63403 | -0.00017                                          | 6  | C  | -3.0212  | -0.47997 | 0.000462 |
| 7                                                 | N  | -0.61273 | -1.73586 | -8E-06                                            | 7  | N  | -2.61594 | 0.839141 | 0.000322 |
| 7                                                 | H  | 2.074639 | 1.918997 | -0.00018                                          | 1  | H  | 1.727823 | 2.061672 | -0.00011 |
| 1                                                 | H  | -2.612   | -2.53606 | 0.000015                                          | 1  | H  | -4.08312 | -0.73372 | 0.000488 |
| 1                                                 | H  | -2.07918 | 2.502376 | 0.000143                                          | 1  | H  | 0.825882 | -2.05454 | -0.00021 |
| 17                                                | Cl | 2.430921 | -0.82613 | -5.8E-05                                          | 17 | Cl | 3.008866 | -0.35584 | -0.00041 |

N3-F- PU\_3H  $E_{\text{tot}} = -510.848903$  a.u.  
Gibbs free energy  $E_G = -510.797916$  a.u.

|   |   |          |          |          |
|---|---|----------|----------|----------|
| 7 | N | 1.455888 | 1.68292  | 0.00006  |
| 6 | C | 1.915763 | 0.443999 | -0.00039 |
| 7 | N | 1.079207 | -0.63247 | -0.00028 |
| 6 | C | -0.27044 | -0.52851 | -1E-06   |
| 6 | C | -0.78924 | 0.843868 | 0.000296 |
| 6 | C | 0.112002 | 1.902545 | 0.000496 |
| 7 | N | -2.1568  | 0.740379 | -0.00043 |
| 6 | C | -2.36235 | -0.58893 | -0.00025 |
| 7 | N | -1.25175 | -1.42518 | 0.000801 |
| 7 | H | 2.982679 | 0.217973 | -0.0004  |
| 1 | H | -3.36544 | -1.01777 | -8.4E-05 |
| 1 | H | -0.21407 | 2.94625  | 0.00001  |
| 9 | F | 1.675178 | -1.90486 | -0.00017 |

N1-F- PU\_1H  $E_{\text{tot}} = -510.844843$  a.u.  
Gibbs free energy  $E_G = -510.794099$

|   |   |          |          |          |
|---|---|----------|----------|----------|
| 7 | N | 1.647114 | -0.16703 | -0.0002  |
| 6 | C | 1.406374 | 1.18318  | -0.00011 |
| 7 | N | 0.178172 | 1.658354 | 0.000048 |
| 6 | C | -0.82341 | 0.740237 | 0.000104 |
| 6 | C | -0.58881 | -0.71588 | 0.00003  |
| 6 | C | 0.718256 | -1.16671 | -0.00014 |
| 7 | N | -1.79094 | -1.36139 | 0.000056 |
| 6 | C | -2.65843 | -0.31749 | 0.000346 |
| 7 | N | -2.14825 | 0.960978 | 0.000388 |
| 7 | H | 2.2903   | 1.822088 | -0.00018 |
| 1 | H | -3.73723 | -0.48539 | 0.000447 |
| 1 | H | 1.081232 | -2.19406 | -0.00026 |
| 9 | F | 2.982129 | -0.56878 | -0.00039 |

N3-H- PU\_3H  $E_{\text{tot}} = -411.727345$  a.u.  
Gibbs free energy  $E_G = -411.664858$  a.u.

|   |   |          |          |          |
|---|---|----------|----------|----------|
| 7 | N | 2.072937 | 0.745955 | 0.000539 |
| 6 | C | 2.048809 | -0.57306 | 0.000429 |
| 7 | N | 0.901102 | -1.3226  | -9E-06   |
| 6 | C | -0.30896 | -0.69164 | -0.00031 |
| 6 | C | -0.327   | 0.761381 | -0.00014 |
| 6 | C | 0.888871 | 1.432181 | 0.000271 |
| 7 | N | -1.6492  | 1.149621 | -0.00059 |
| 6 | C | -2.29914 | -0.0285  | 0.000644 |
| 7 | N | -1.54133 | -1.19673 | -0.00084 |
| 1 | H | 0.958232 | 2.524362 | 0.000366 |
| 1 | H | -3.38904 | -0.08448 | 0.000104 |
| 1 | H | 2.985325 | -1.13528 | 0.000592 |
| 1 | H | 0.945502 | -2.34051 | -0.00015 |

N1-H- PU\_1H  $E_{\text{tot}} = -411.722874$  a.u.  
Gibbs free energy  $E_G = -411.660423$  a.u.

|   |   |          |          |          |
|---|---|----------|----------|----------|
| 7 | N | 1.998293 | 0.60907  | 0.000281 |
| 6 | C | 1.944534 | -0.76881 | 0.000166 |
| 7 | N | 0.831723 | -1.46826 | -2.5E-05 |
| 6 | C | -0.31401 | -0.73292 | -9.3E-05 |
| 6 | C | -0.33035 | 0.740831 | 0.00001  |
| 6 | C | 0.875838 | 1.404443 | 0.000212 |
| 7 | N | -1.63187 | 1.170039 | -0.00012 |
| 6 | C | -2.30446 | -0.00402 | -0.00017 |
| 7 | N | -1.58092 | -1.1785  | -0.00034 |
| 1 | H | 1.020069 | 2.486083 | 0.000314 |
| 1 | H | -3.39633 | -0.02647 | -0.00036 |
| 1 | H | 2.913982 | -1.27315 | 0.000243 |
| 1 | H | 2.912345 | 1.049889 | 0.000424 |

N3-Me- PU\_3H  $E_{\text{tot}} = -451.017870$  a.u.  
Gibbs free energy  $E_G = -450.930743$  a.u.

|   |   |          |          |          |
|---|---|----------|----------|----------|
| 7 | N | -1.2689  | 1.849171 | -0.00003 |
| 6 | C | -1.83101 | 0.653586 | 0.000013 |
| 7 | N | -1.15325 | -0.53917 | 0.000074 |
| 6 | C | 0.212758 | -0.4884  | 0.000019 |
| 6 | C | 0.879626 | 0.79907  | -3.6E-05 |
| 6 | C | 0.093052 | 1.943477 | -3.2E-05 |
| 7 | N | 2.236326 | 0.555153 | -0.00005 |
| 6 | C | 2.291318 | -0.78928 | -0.00049 |
| 7 | N | 1.092142 | -1.49379 | 0.000229 |
| 1 | H | -2.92084 | 0.573639 | 0.000093 |
| 1 | H | 3.241552 | -1.32608 | -0.00023 |
| 1 | H | 0.515801 | 2.952788 | -0.00011 |
| 6 | C | -1.8413  | -1.83915 | 0.000196 |
| 1 | H | -1.54158 | -2.40459 | -0.89296 |
| 1 | H | -1.54118 | -2.40462 | 0.893191 |
| 1 | H | -2.92461 | -1.66651 | 0.000439 |

N1-Me- PU\_1H  $E_{\text{tot}} = -451.009572$  a.u.  
Gibbs free energy  $E_G = -450.921889$  a.u.

|   |   |          |          |          |
|---|---|----------|----------|----------|
| 7 | N | -1.67365 | -0.15413 | 0.000273 |
| 6 | C | -1.33739 | 1.186998 | 0.000155 |
| 7 | N | -0.1123  | 1.666916 | -8.5E-05 |
| 6 | C | 0.877218 | 0.735878 | -0.00013 |
| 6 | C | 0.610062 | -0.70855 | -5.5E-05 |
| 6 | C | -0.70185 | -1.12835 | 0.000164 |
| 7 | N | 1.804247 | -1.38067 | -0.00045 |
| 6 | C | 2.691779 | -0.35745 | 0.000371 |
| 7 | N | 2.207619 | 0.932797 | -0.00078 |
| 1 | H | -2.18812 | 1.873412 | 0.000182 |
| 1 | H | 3.767459 | -0.54587 | -0.00043 |
| 1 | H | -1.03376 | -2.16796 | 0.000202 |
| 6 | C | -3.09976 | -0.52155 | 0.000454 |
| 1 | H | -3.59108 | -0.12065 | 0.899258 |
| 1 | H | -3.59131 | -0.12067 | -0.89823 |
| 1 | H | -3.18494 | -1.61449 | 0.000476 |

|                                                   |   |          |          |                                                   |   |   |          |          |          |
|---------------------------------------------------|---|----------|----------|---------------------------------------------------|---|---|----------|----------|----------|
| N3-OMe- PU_3H $E_{\text{tot}} = -526.143912$ a.u. |   |          |          | N1-OMe- PU_1H $E_{\text{tot}} = -526.138516$ a.u. |   |   |          |          |          |
| Gibbs free energy $E_G = -526.055290$ a.u.        |   |          |          | Gibbs free energy $E_G = -526.050245$ a.u.        |   |   |          |          |          |
| 7                                                 | N | 0.28004  | 2.359251 | 0.082993                                          | 7 | N | 1.271897 | 0.041568 | 0.309704 |
| 6                                                 | C | -0.85311 | 1.704759 | -0.10474                                          | 6 | C | 0.883339 | 1.354782 | 0.164942 |
| 7                                                 | N | -0.93567 | 0.343441 | -0.21916                                          | 7 | N | -0.36663 | 1.725412 | -0.01668 |
| 6                                                 | C | 0.191026 | -0.42262 | -0.13789                                          | 6 | C | -1.27826 | 0.717799 | -0.05699 |
| 6                                                 | C | 1.451892 | 0.270605 | 0.082277                                          | 6 | C | -0.92005 | -0.70249 | 0.101558 |
| 6                                                 | C | 1.444349 | 1.657402 | 0.179287                                          | 6 | C | 0.407924 | -1.02258 | 0.294505 |
| 7                                                 | N | 2.434974 | -0.69237 | 0.128362                                          | 7 | N | -2.05785 | -1.45871 | 0.026568 |
| 6                                                 | C | 1.744287 | -1.83195 | -0.0514                                           | 6 | C | -3.00377 | -0.50758 | -0.16736 |
| 7                                                 | N | 0.366854 | -1.74311 | -0.22084                                          | 7 | N | -2.60863 | 0.810498 | -0.22607 |
| 1                                                 | H | -1.80574 | 2.229141 | -0.19344                                          | 1 | H | 1.696905 | 2.079829 | 0.225093 |
| 1                                                 | H | 2.234105 | -2.80681 | -0.06756                                          | 1 | H | -4.05665 | -0.7765  | -0.27512 |
| 1                                                 | H | 2.357609 | 2.239503 | 0.333299                                          | 1 | H | 0.83924  | -2.01225 | 0.445815 |
| 8                                                 | O | -2.18746 | -0.19998 | -0.51313                                          | 8 | O | 2.626801 | -0.21363 | 0.53682  |
| 6                                                 | C | -2.64337 | -1.06648 | 0.568536                                          | 6 | C | 3.305796 | -0.47308 | -0.72212 |
| 1                                                 | H | -2.71046 | -0.48986 | 1.505437                                          | 1 | H | 3.234306 | 0.404596 | -1.38484 |
| 1                                                 | H | -3.64102 | -1.38539 | 0.240188                                          | 1 | H | 4.349719 | -0.65529 | -0.43493 |
| 1                                                 | H | -1.96868 | -1.92756 | 0.671092                                          | 1 | H | 2.880604 | -1.3639  | -1.21243 |
| N3-OH- PU_3H $E_{\text{tot}} = -486.868000$ a.u.  |   |          |          | N1-OH- PU_1H $E_{\text{tot}} = -486.853390$ a.u.  |   |   |          |          |          |
| Gibbs free energy $E_G = -486.803932$ a.u.        |   |          |          | Gibbs free energy $E_G = -486.790443$ a.u.        |   |   |          |          |          |
| 7                                                 | N | -1.50236 | 1.658162 | 0.000008                                          | 7 | N | -1.66575 | -0.16515 | -0.00524 |
| 6                                                 | C | -1.93276 | 0.403854 | -0.00002                                          | 6 | C | -1.38176 | 1.18371  | -0.01293 |
| 7                                                 | N | -1.08333 | -0.66166 | -4.4E-05                                          | 7 | N | -0.15675 | 1.663722 | -0.00367 |
| 6                                                 | C | 0.256884 | -0.46648 | -2.4E-05                                          | 6 | C | 0.839374 | 0.738844 | 0.005915 |
| 6                                                 | C | 0.764006 | 0.884424 | -1.5E-05                                          | 6 | C | 0.59257  | -0.71388 | -0.00402 |
| 6                                                 | C | -0.16745 | 1.922564 | -1.6E-05                                          | 6 | C | -0.71472 | -1.15384 | -0.01977 |
| 7                                                 | N | 2.138815 | 0.782915 | 0.000103                                          | 7 | N | 1.793645 | -1.3685  | -0.00262 |
| 6                                                 | C | 2.346393 | -0.54751 | 0.000028                                          | 6 | C | 2.667431 | -0.33258 | 0.009225 |
| 7                                                 | N | 1.230386 | -1.37872 | -0.00015                                          | 7 | N | 2.166081 | 0.950599 | 0.013905 |
| 1                                                 | H | -2.99678 | 0.164056 | 0.000017                                          | 1 | H | -2.25781 | 1.834384 | -0.03159 |
| 1                                                 | H | 3.349741 | -0.97516 | 0.000044                                          | 1 | H | 3.745328 | -0.50714 | 0.014326 |
| 1                                                 | H | 0.122383 | 2.977179 | -4.5E-05                                          | 1 | H | -1.0722  | -2.18329 | -0.04665 |
| 8                                                 | O | -1.59751 | -1.95575 | 0.000071                                          | 8 | O | -3.01194 | -0.54829 | -0.08329 |
| 1                                                 | H | -0.78227 | -2.50603 | 0.000285                                          | 1 | H | -3.29774 | -0.65588 | 0.843046 |
| N3-OH- PU_3H $E_{\text{tot}} = -486.867999$ a.u.  |   |          |          | N1-OH- PU_1H $E_{\text{tot}} = -486.852982$ a.u.  |   |   |          |          |          |
| Gibbs free energy $E_G = -486.803936$ a.u.        |   |          |          | Gibbs free energy $E_G = -486.790022$ a.u.        |   |   |          |          |          |
| 7                                                 | N | 1.50276  | 1.65784  | -6.9E-05                                          | 7 | N | -1.66871 | -0.15297 | 0.000172 |
| 6                                                 | C | 1.933052 | 0.403605 | -0.00018                                          | 6 | C | -1.38033 | 1.190513 | 0.000058 |
| 7                                                 | N | 1.083279 | -0.66174 | -0.00011                                          | 7 | N | -0.14946 | 1.663061 | -7.1E-05 |
| 6                                                 | C | -0.25686 | -0.46632 | 0.000006                                          | 6 | C | 0.842382 | 0.739622 | -0.00016 |
| 6                                                 | C | -0.76378 | 0.884742 | 0.000122                                          | 6 | C | 0.590238 | -0.71132 | -1.5E-05 |
| 6                                                 | C | 0.16792  | 1.922632 | 0.000092                                          | 6 | C | -0.72234 | -1.14216 | 0.000148 |
| 7                                                 | N | -2.1387  | 0.783327 | 0.000362                                          | 7 | N | 1.783558 | -1.3732  | 0.000075 |
| 6                                                 | C | -2.34636 | -0.54703 | -0.00024                                          | 6 | C | 2.665641 | -0.33901 | -0.00079 |
| 7                                                 | N | -1.23048 | -1.37857 | 0.000179                                          | 7 | N | 2.173577 | 0.943419 | -3.5E-05 |
| 1                                                 | H | 2.997031 | 0.163654 | -0.00025                                          | 1 | H | -2.25189 | 1.846281 | 0.00015  |
| 1                                                 | H | -3.34977 | -0.97458 | 0.000018                                          | 1 | H | 3.742073 | -0.52207 | -0.00044 |
| 1                                                 | H | -0.12167 | 2.97736  | 0.000205                                          | 1 | H | -1.06387 | -2.17989 | 0.0003   |
| 8                                                 | O | 1.596477 | -1.95655 | -0.00015                                          | 8 | O | -3.03649 | -0.46222 | 0.000385 |
| 1                                                 | H | 0.780628 | -2.50587 | -5.7E-05                                          | 1 | H | -3.08068 | -1.4346  | 0.000459 |

N3-NH<sub>2</sub>-PU\_3H E<sub>tot</sub> = -467.018518 a.u.  
Gibbs free energy E<sub>G</sub> = -466.942304 a.u.

|   |   |          |          |          |
|---|---|----------|----------|----------|
| 7 | N | -1.29864 | 1.809859 | -2.1E-05 |
| 6 | C | -1.83895 | 0.608173 | 0.000186 |
| 7 | N | -1.1355  | -0.57734 | 0.000159 |
| 6 | C | 0.233649 | -0.52499 | 0.000019 |
| 6 | C | 0.866383 | 0.791167 | -0.00018 |
| 6 | C | 0.063545 | 1.921733 | -0.00027 |
| 7 | N | 2.227055 | 0.587595 | 0.000081 |
| 6 | C | 2.319641 | -0.75522 | 0.000088 |
| 7 | N | 1.144184 | -1.49685 | -0.00034 |
| 1 | H | -2.92658 | 0.494676 | 0.000232 |
| 1 | H | 3.285112 | -1.26445 | -0.00011 |
| 1 | H | 0.473514 | 2.935965 | -0.00014 |
| 7 | N | -1.78478 | -1.84242 | 0.000159 |
| 1 | H | -2.3817  | -1.88873 | 0.828918 |
| 1 | H | -2.3822  | -1.88847 | -0.82825 |

N1-NH<sub>2</sub>-PU\_1H E<sub>tot</sub> = -467.018746 a.u.  
Gibbs free energy E<sub>G</sub> = -466.942667 a.u.

|   |   |          |          |          |
|---|---|----------|----------|----------|
| 7 | N | -1.67314 | -0.18019 | 0.000204 |
| 6 | C | -1.36445 | 1.171215 | 0.000085 |
| 7 | N | -0.14541 | 1.660718 | -7.9E-05 |
| 6 | C | 0.853993 | 0.737588 | -0.00015 |
| 6 | C | 0.605099 | -0.71144 | -2.7E-05 |
| 6 | C | -0.70056 | -1.1523  | 0.000151 |
| 7 | N | 1.808761 | -1.36678 | -5.5E-05 |
| 6 | C | 2.682141 | -0.33274 | -0.00048 |
| 7 | N | 2.180139 | 0.951859 | -0.00024 |
| 1 | H | -2.23215 | 1.836769 | 0.000161 |
| 1 | H | 3.760255 | -0.50627 | -0.00045 |
| 1 | H | -1.05087 | -2.18415 | 0.000276 |
| 7 | N | -3.02248 | -0.62845 | 0.000408 |
| 1 | H | -3.48471 | -0.24015 | 0.826298 |
| 1 | H | -3.48492 | -0.24025 | -0.82541 |
